# Supplementary material for: A GC-rich sequence feature in the 3′ UTR directs UPF1-dependent mRNA decay in mammalian cells
Source: PubMed Central journal article supplement — Genome Res. 2017 Mar;27(3):407–18. doi: 10.1101/gr.206060.116 (PMC5340968; doi:10.1101/gr.206060.116), 2017-03

# Supplemental Fig S9.

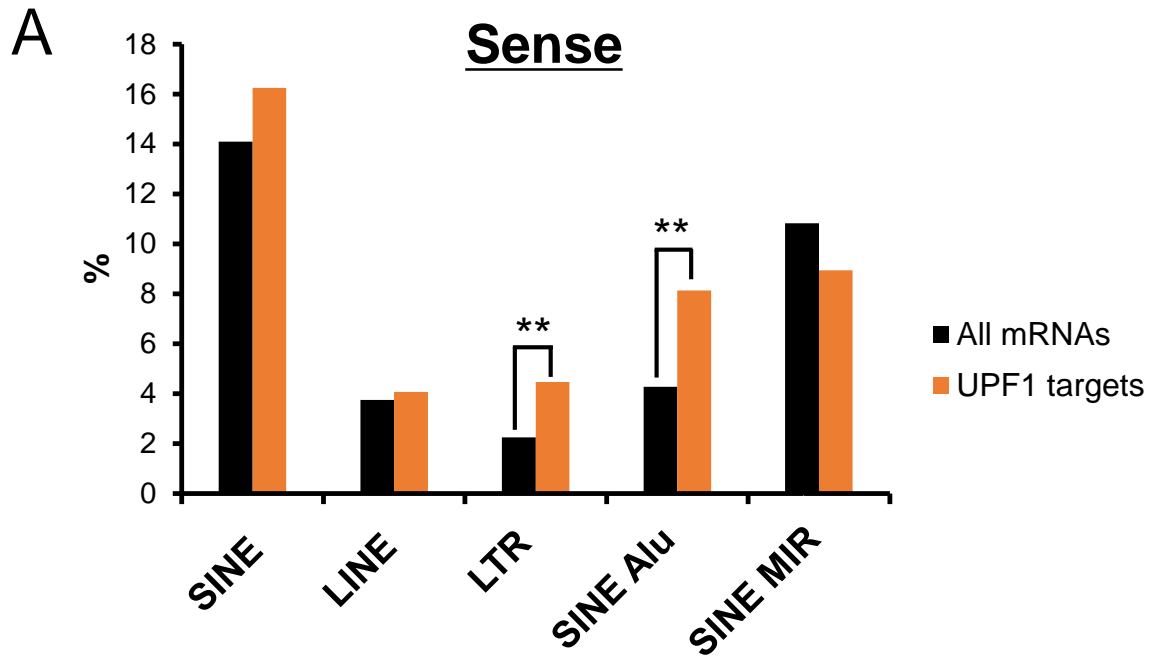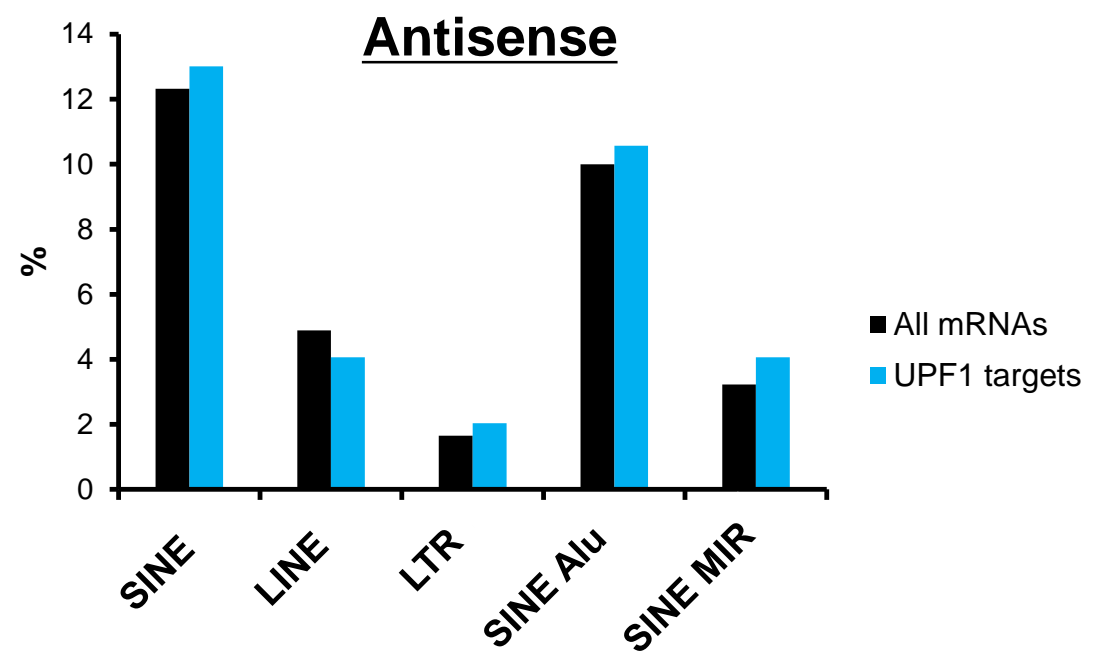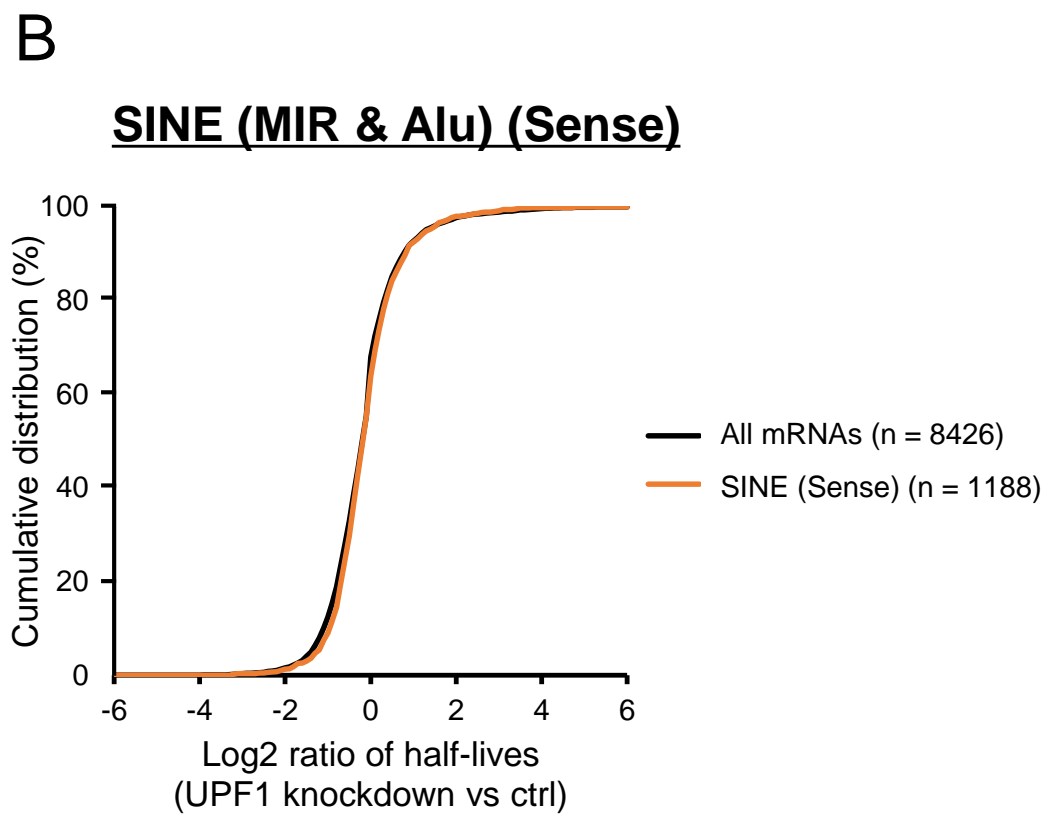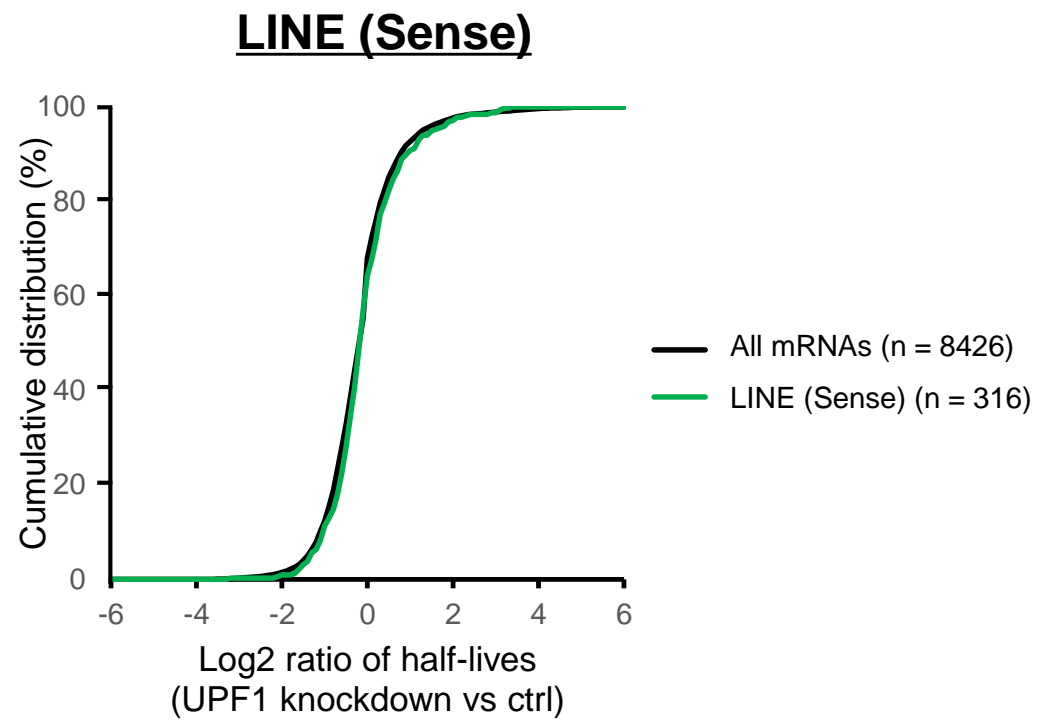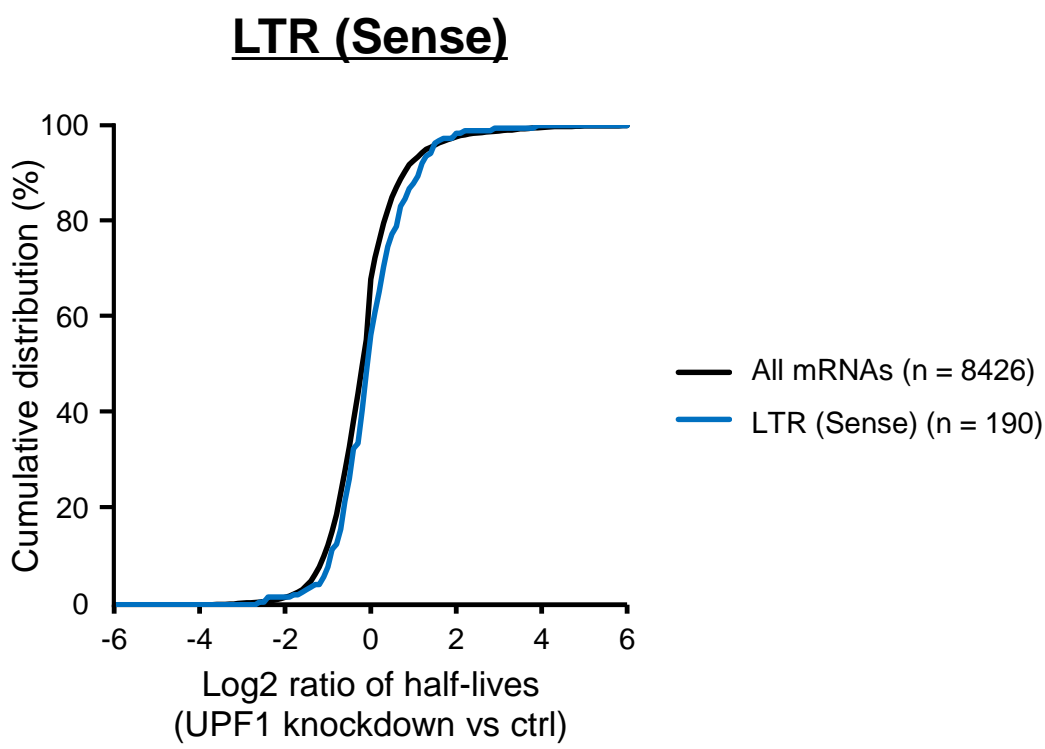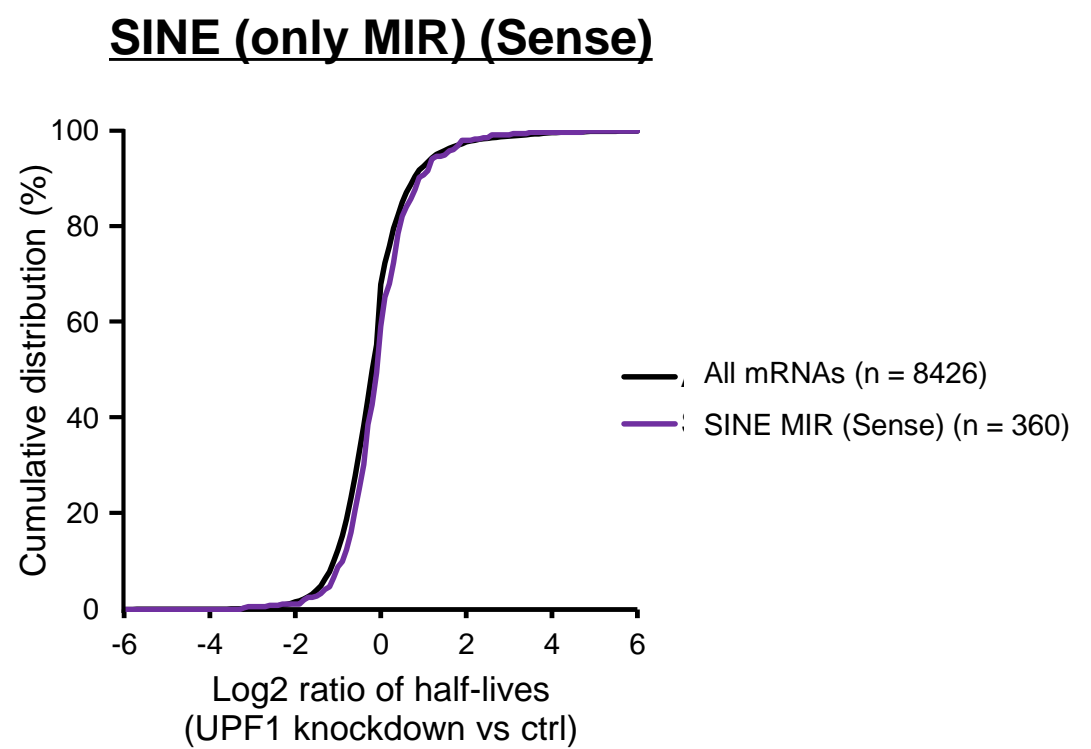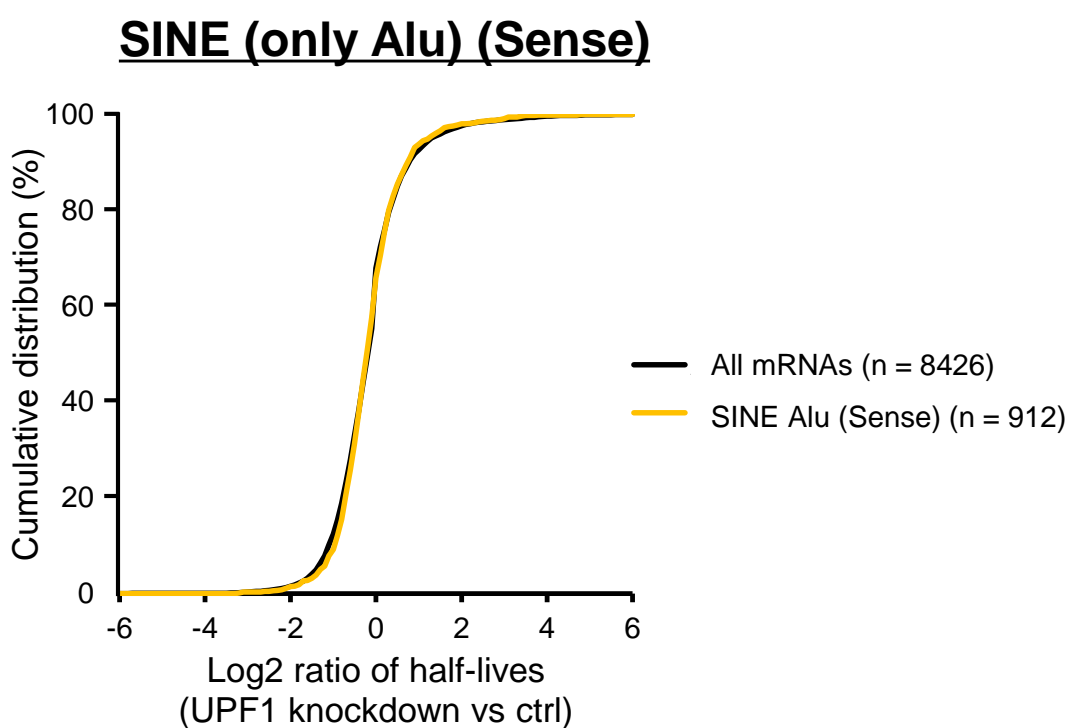

# Supplemental Fig S9.

## C

### SINE (MIR & Alu) (Antisense)

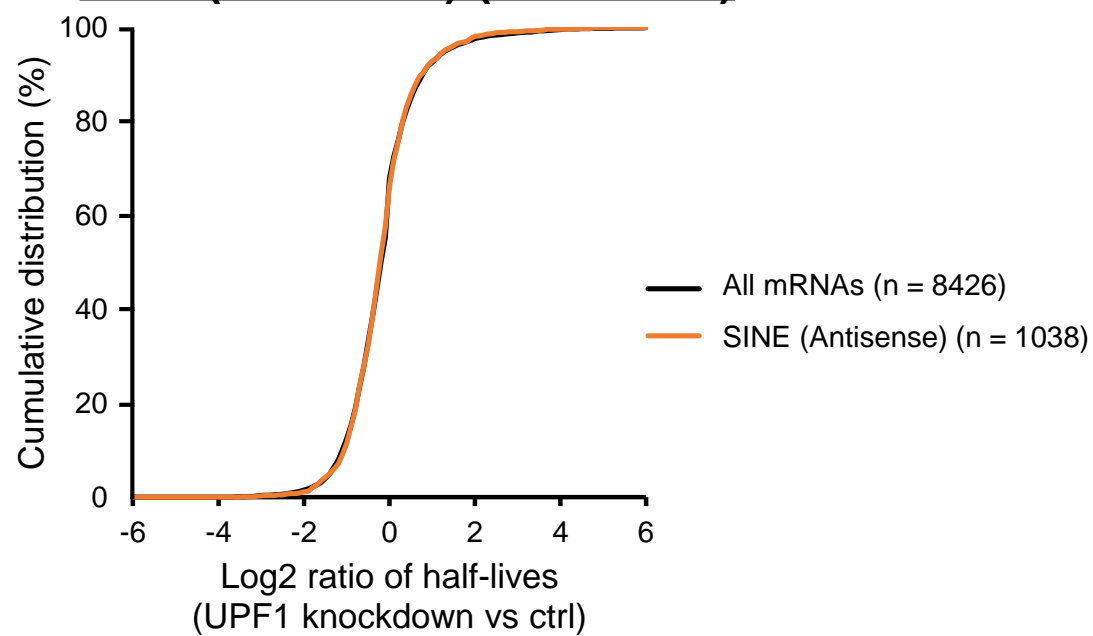

### LINE (Antisense)

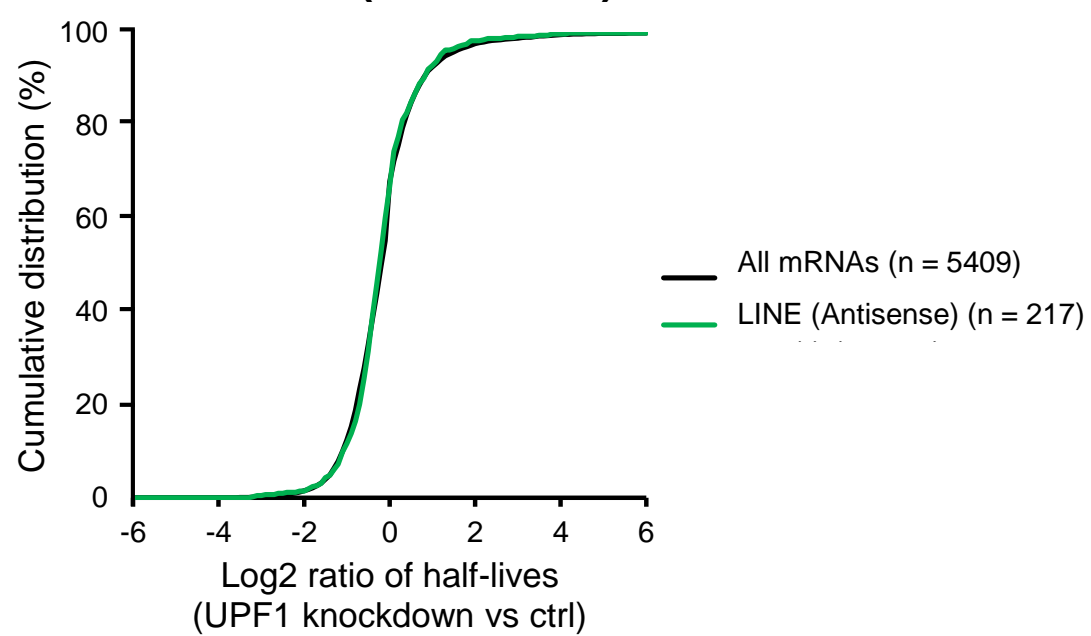

### LTR (Antisense)

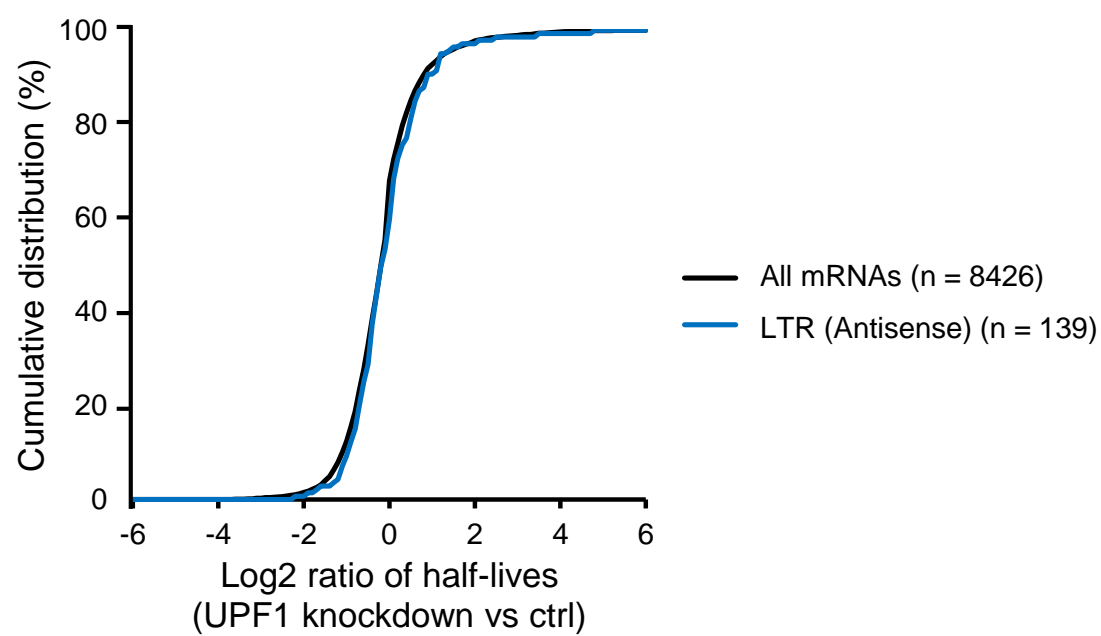

### SINE (only MIR) (Antisense)

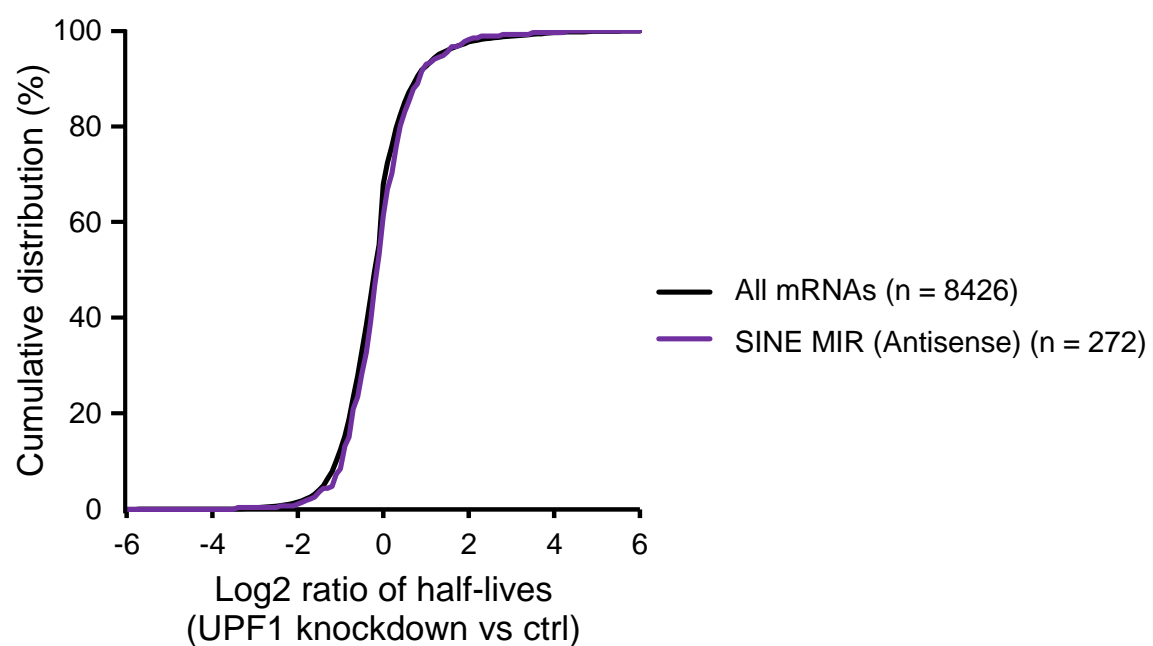

### SINE (only Alu) (Antisense)

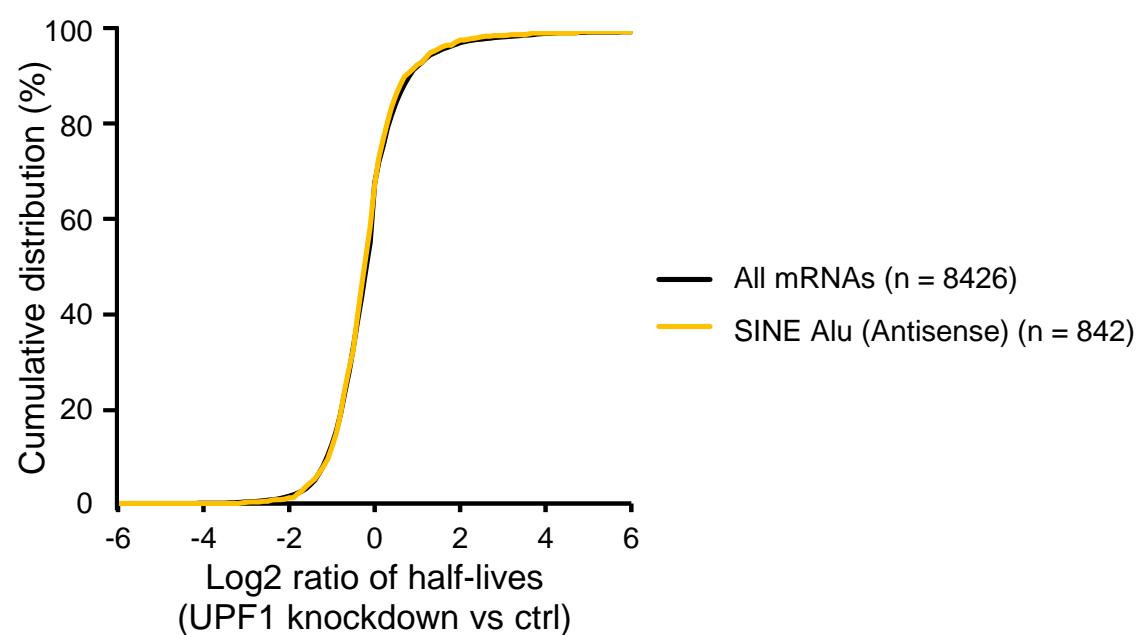

# Supplemental Fig S9.

D

## SINE (MIR & Alu) (Sense)

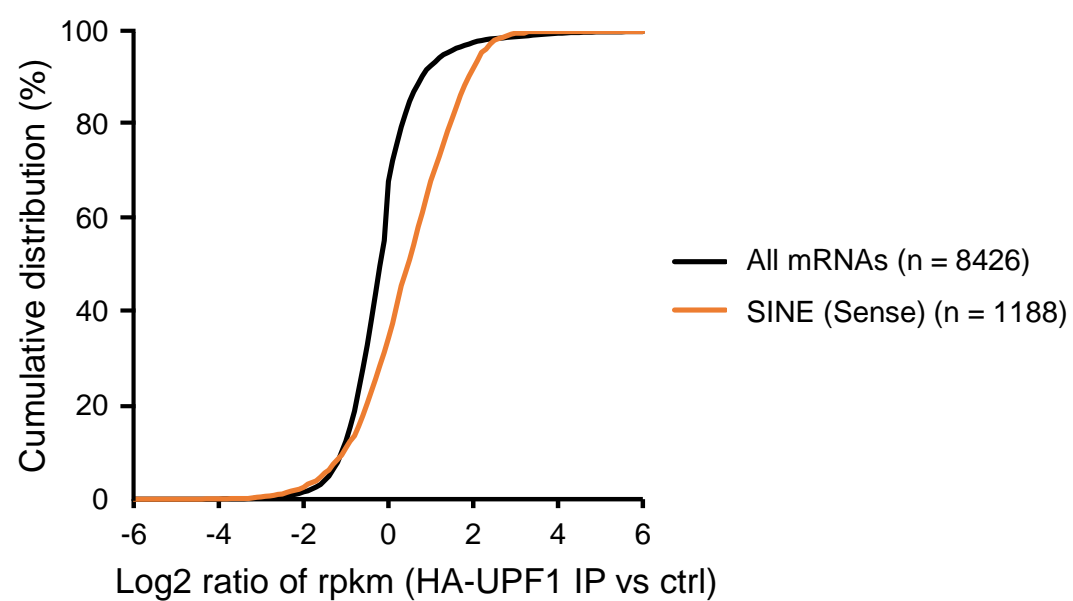

## LINE (Sense)

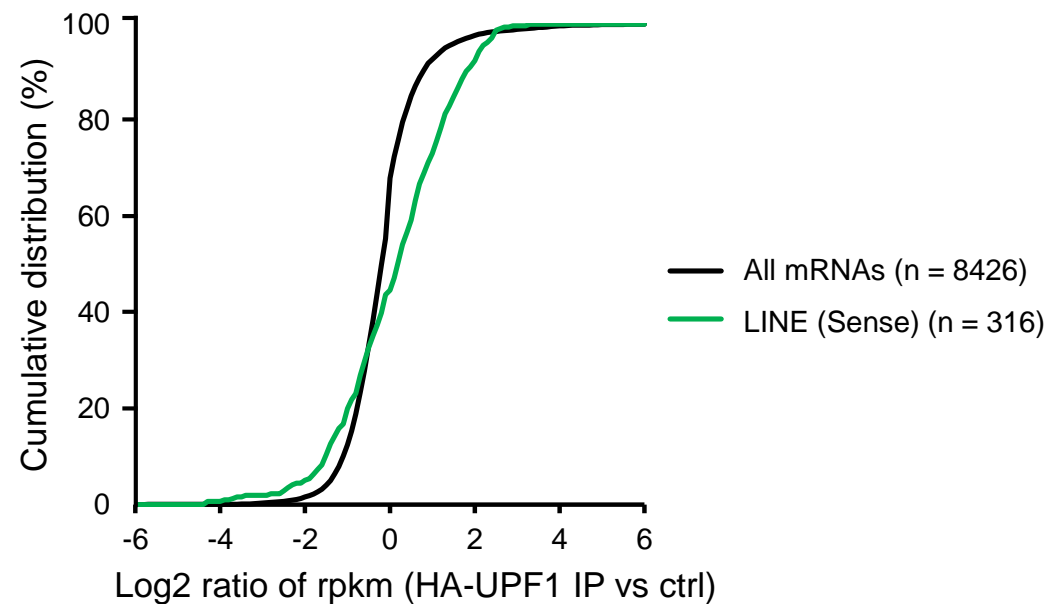

## LTR (Sense)

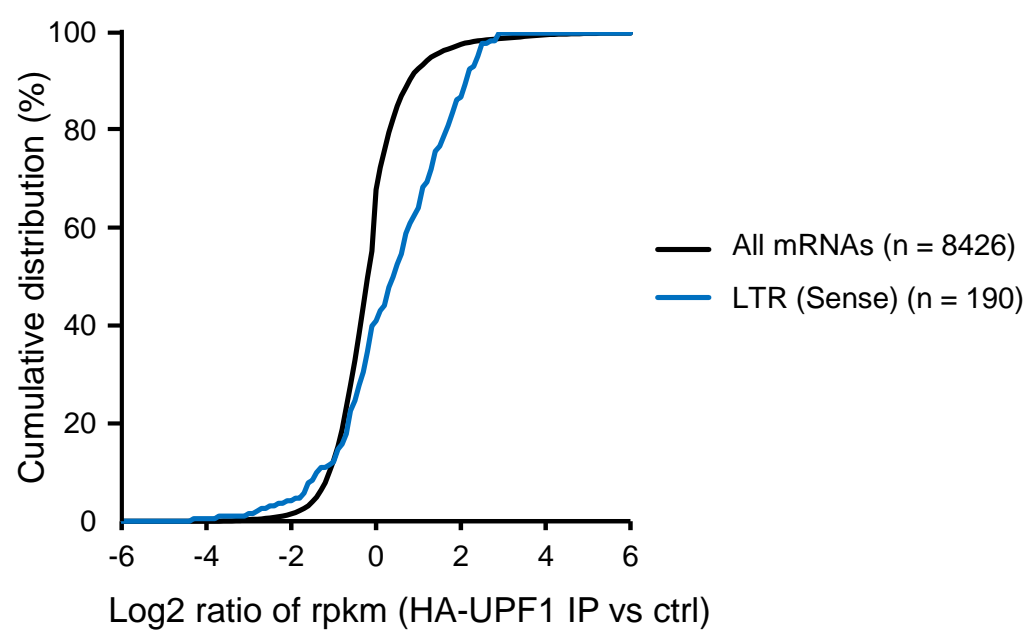

## SINE (only MIR) (Sense)

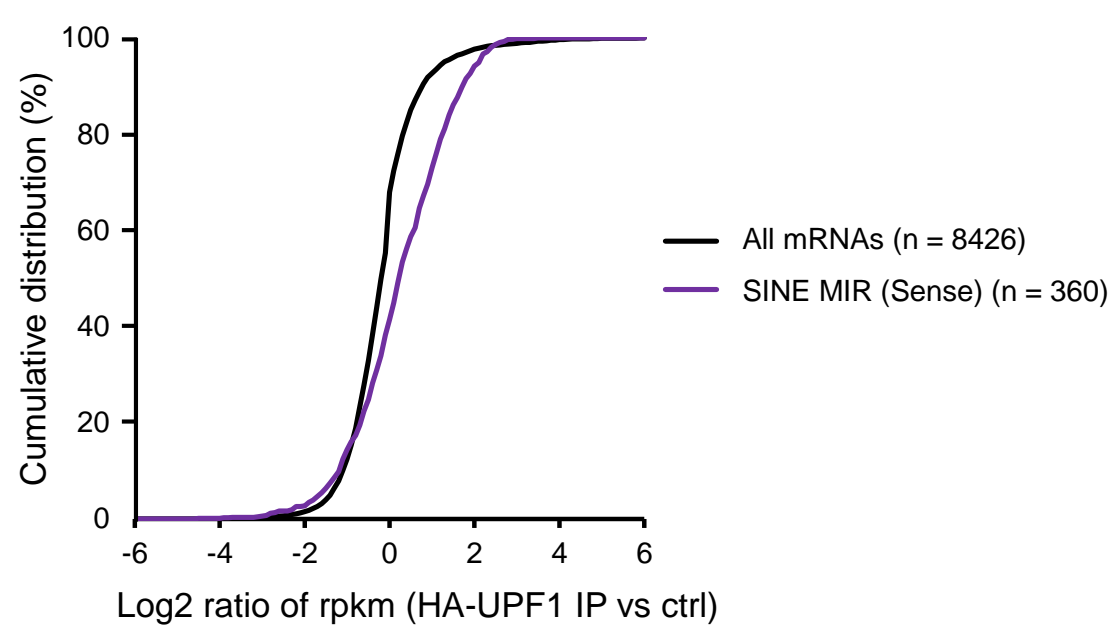

## SINE (only Alu) (Sense)

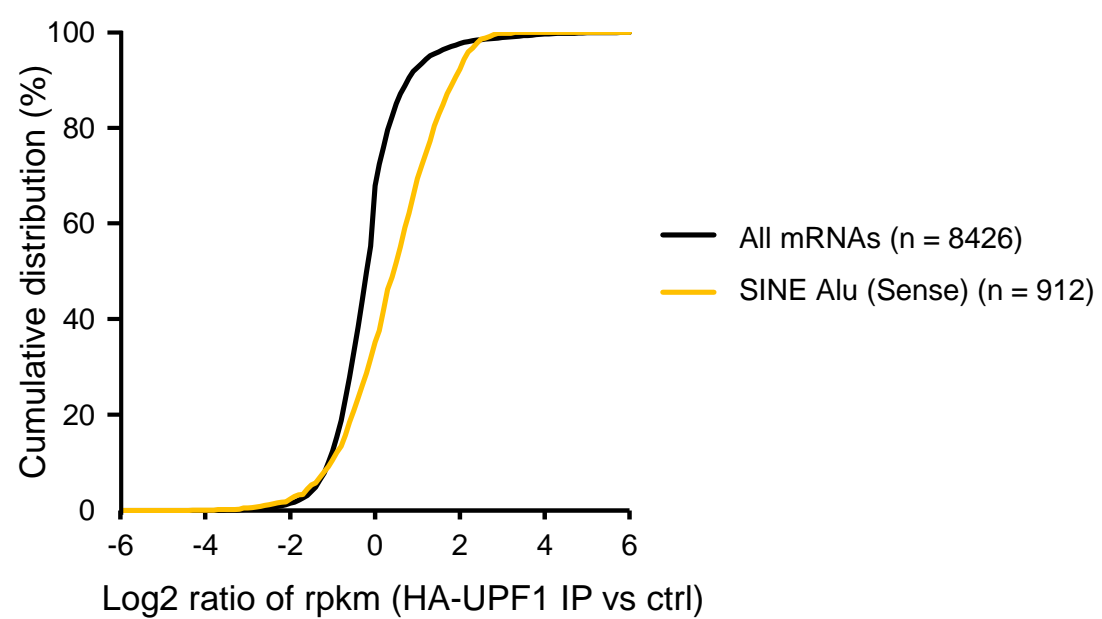

# Supplemental Fig S9.

## E

### SINE (MIR & Alu) (Antisense)

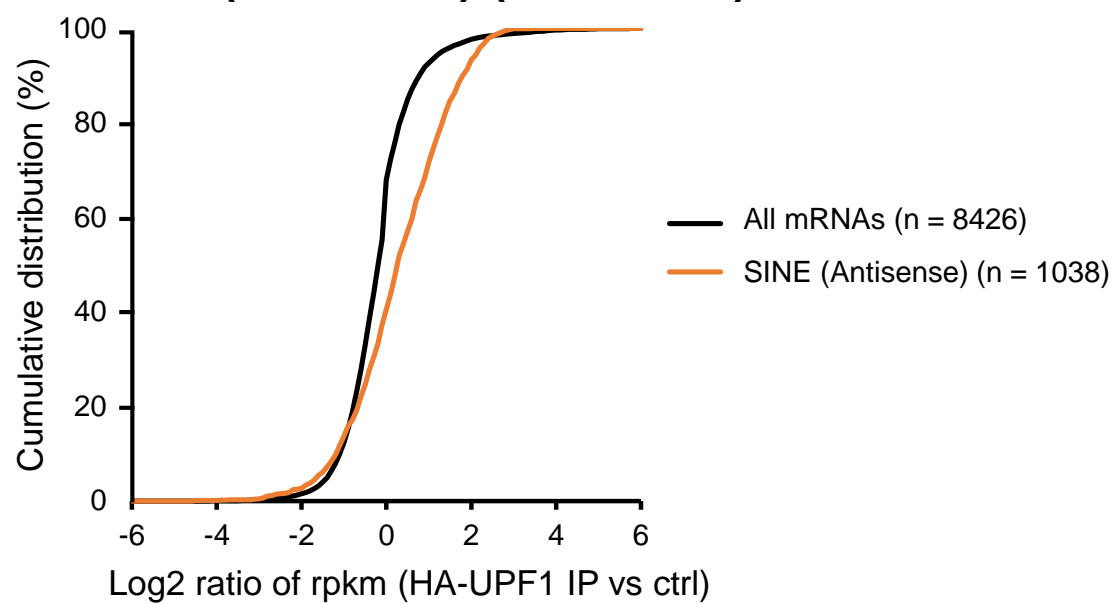

### LINE (Antisense)

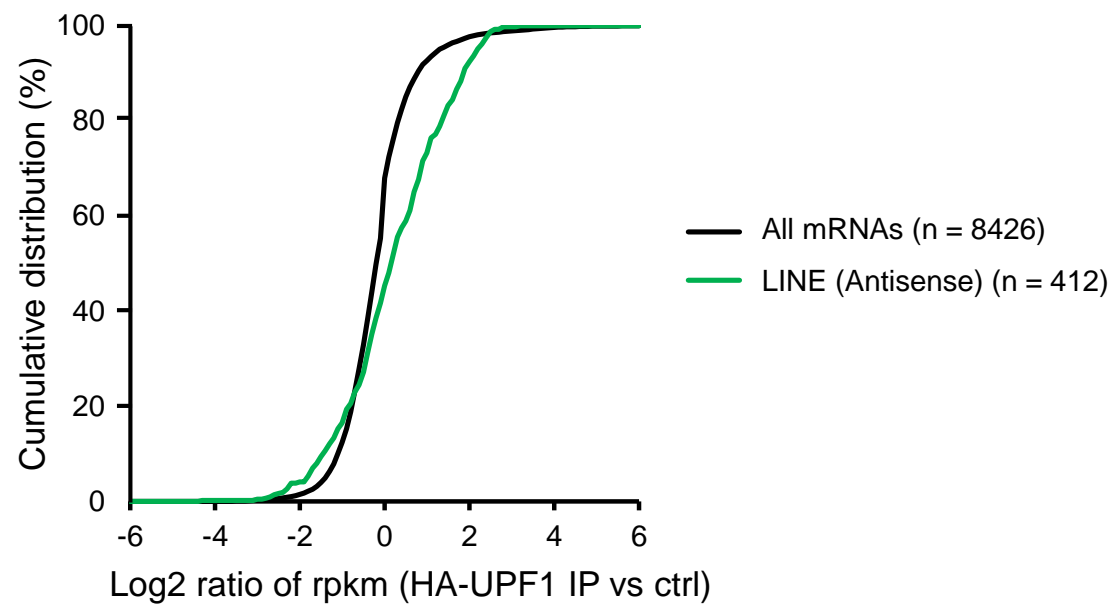

### LTR (Antisense)

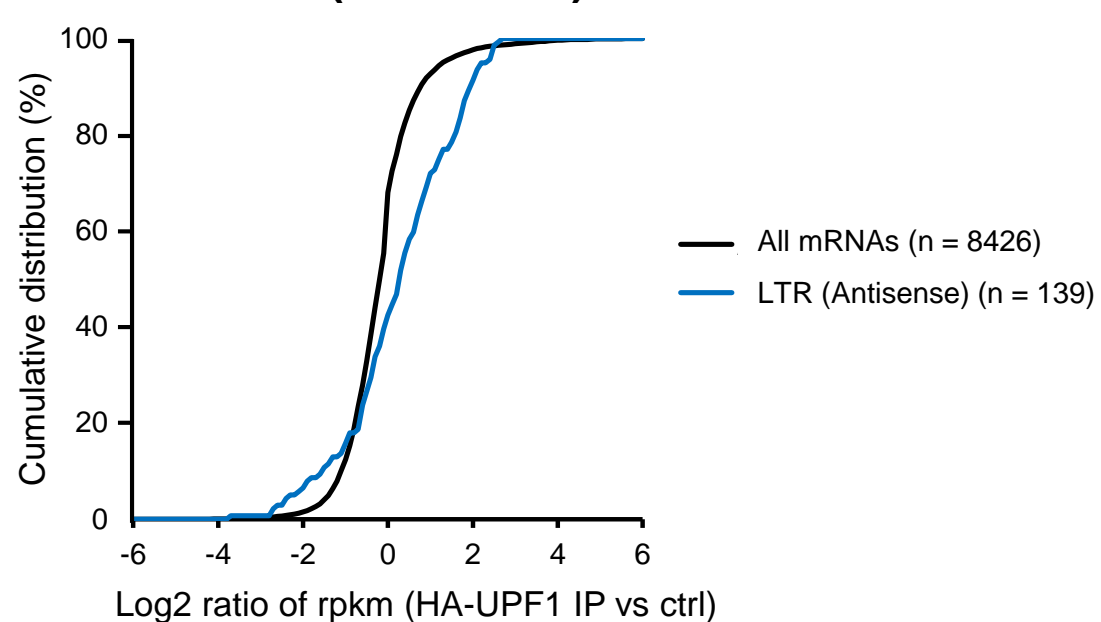

### SINE (only MIR) (Antisense)

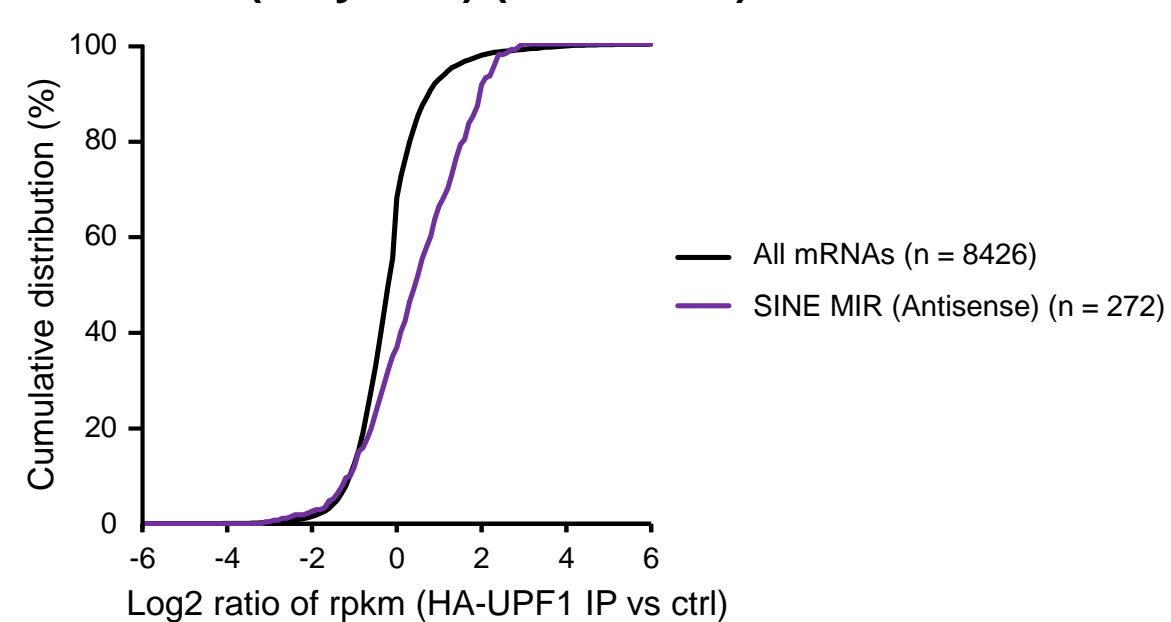

### SINE (only Alu) (Antisense)

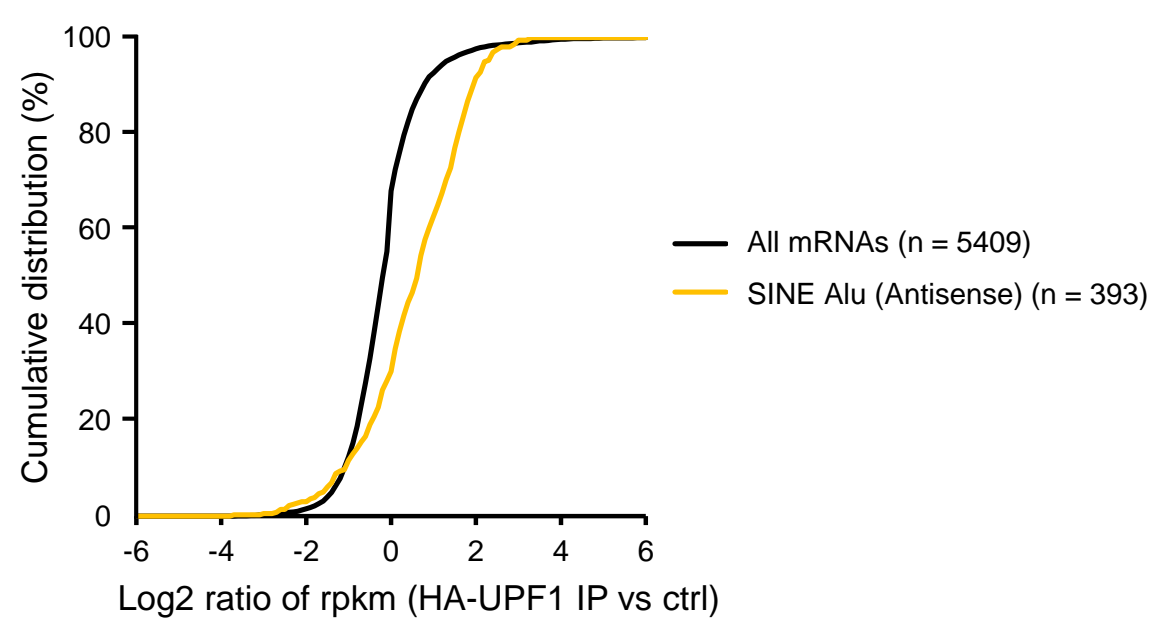

# Supplemental Fig S9.

## F

### SINE (MIR & Alu) (Sense)

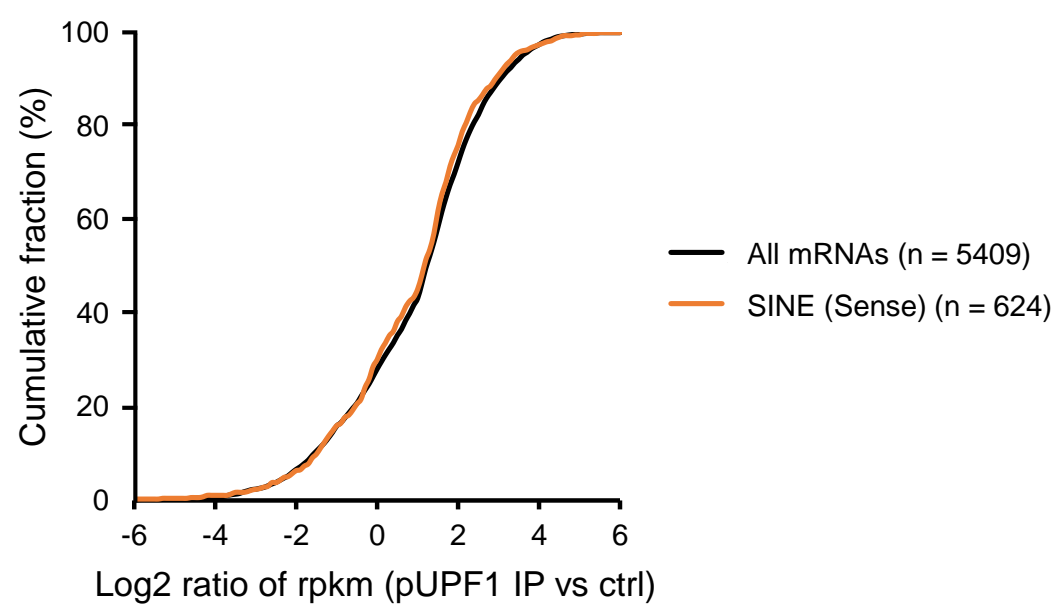

### LINE (Sense)

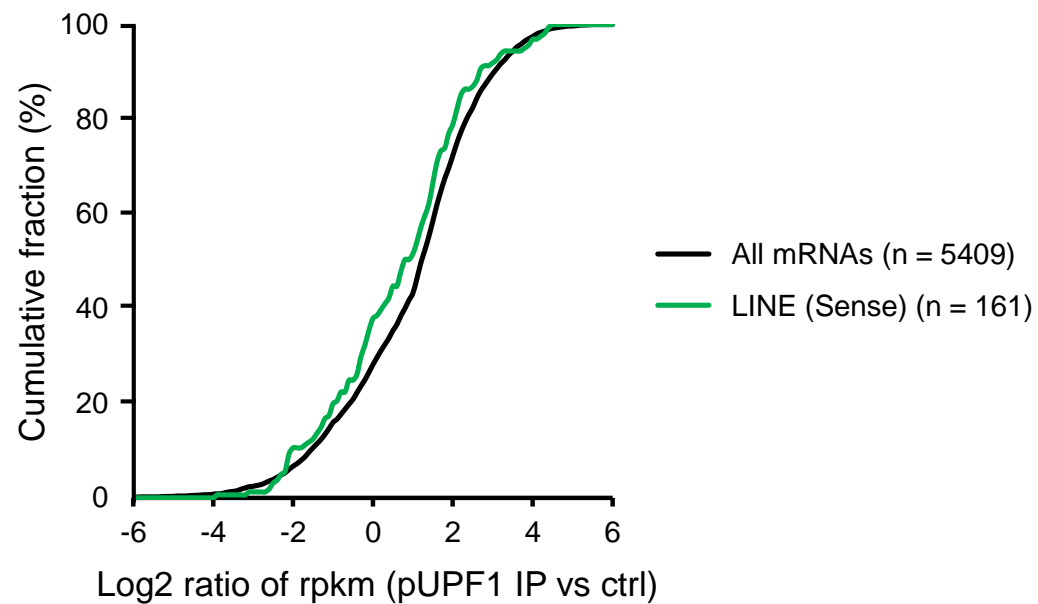

### LTR (Sense)

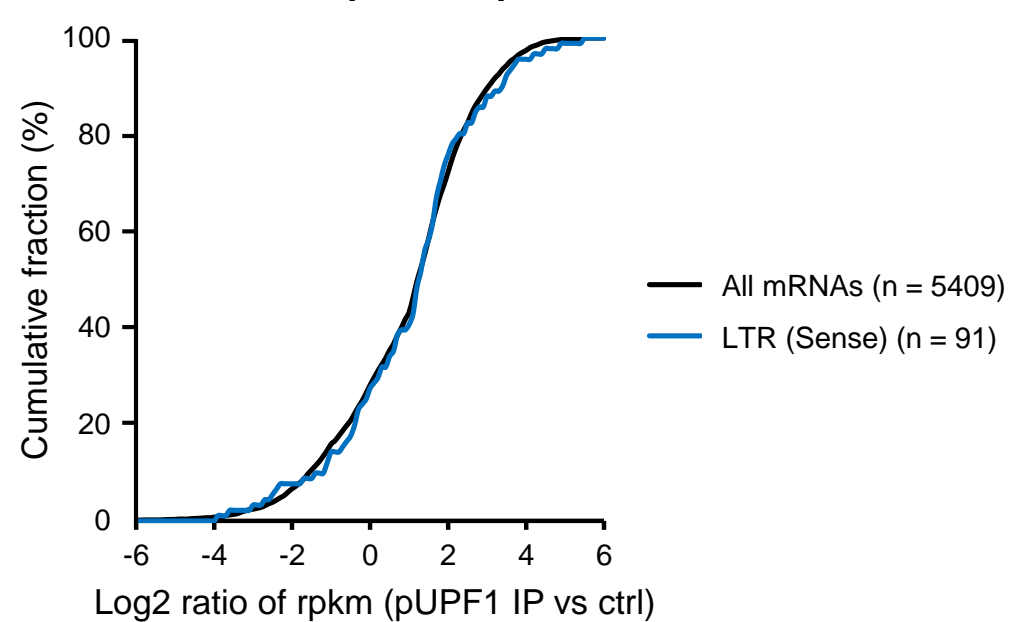

### SINE (only MIR) (Sense)

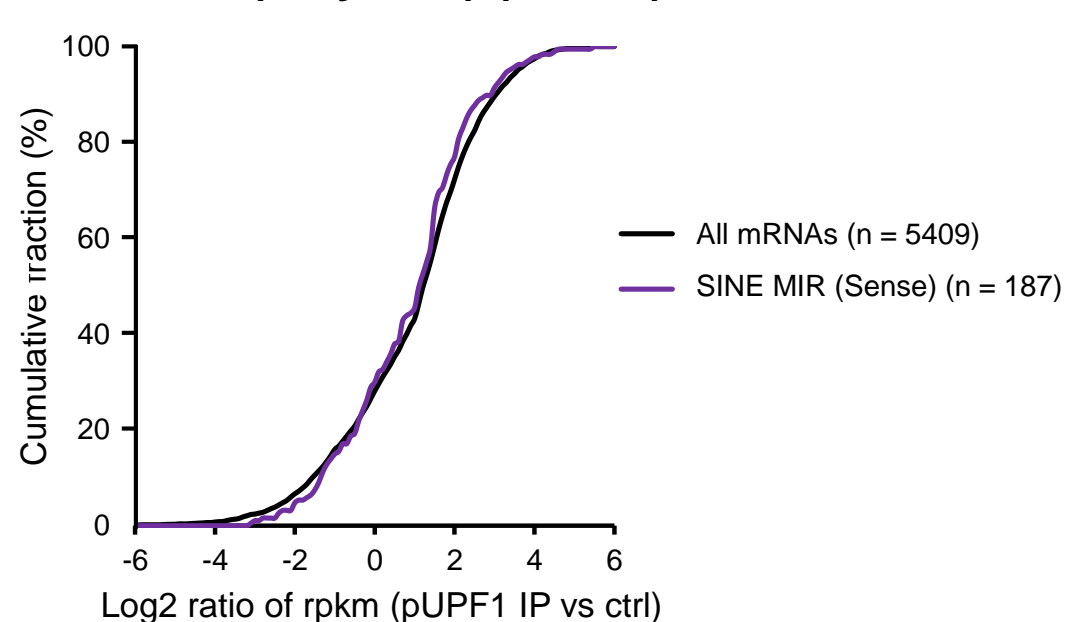

### SINE (only Alu) (Sense)

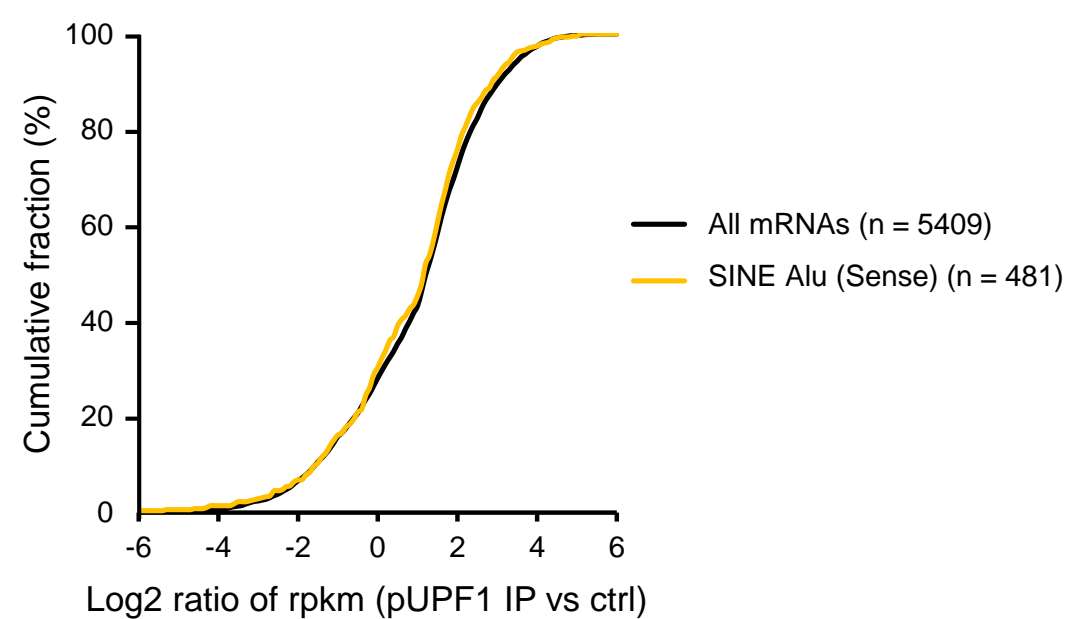

# Supplemental Fig S9.

## G

### SINE (MIR & Alu) (Antisense)

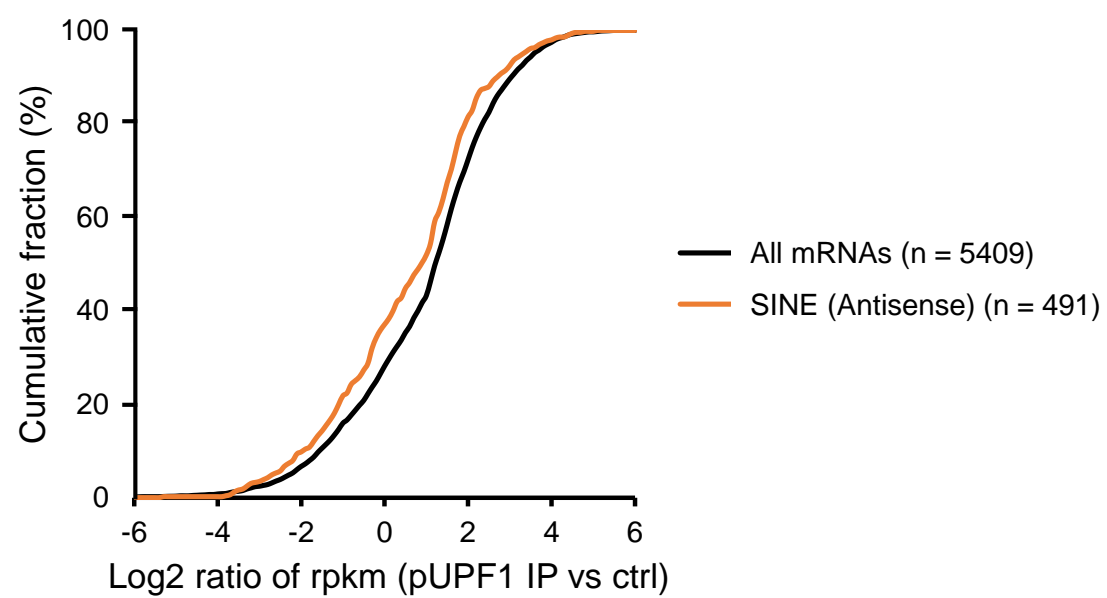

### LINE (Antisense)

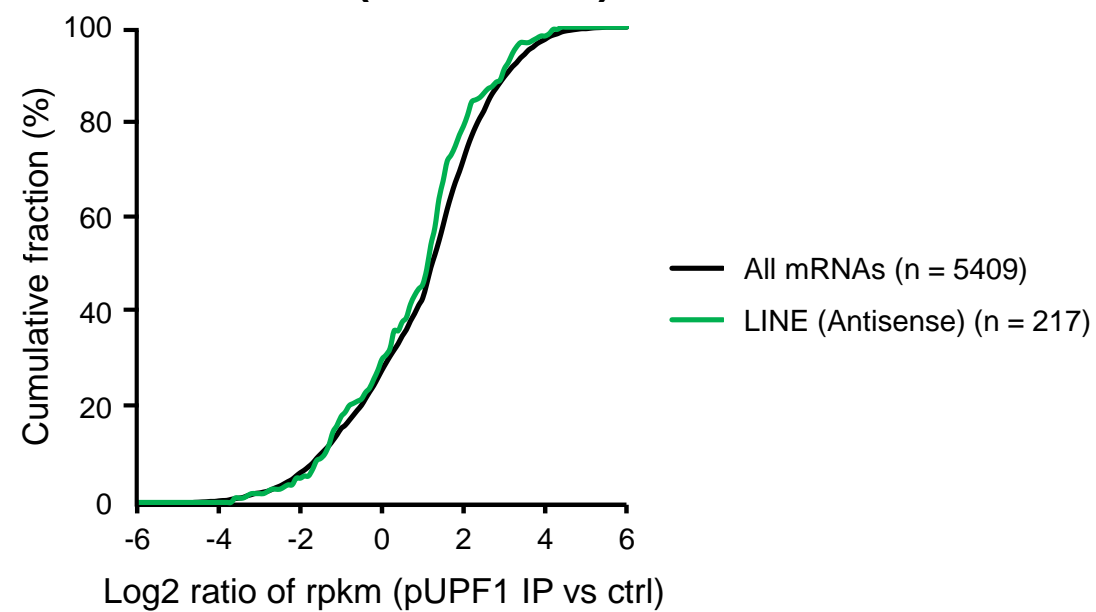

### LTR (Antisense)

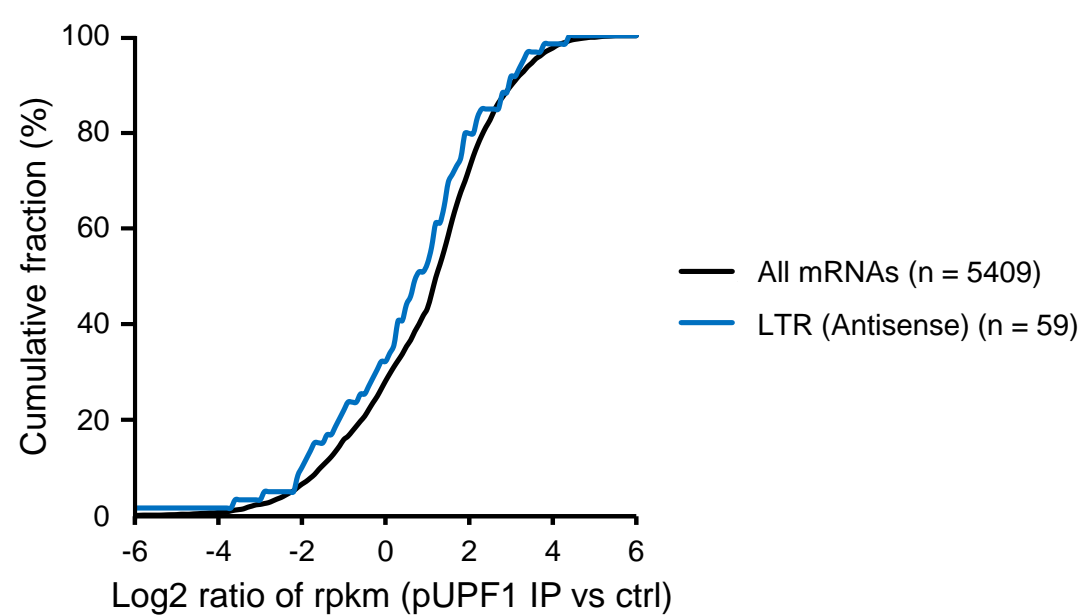

### SINE (only MIR) (Antisense)

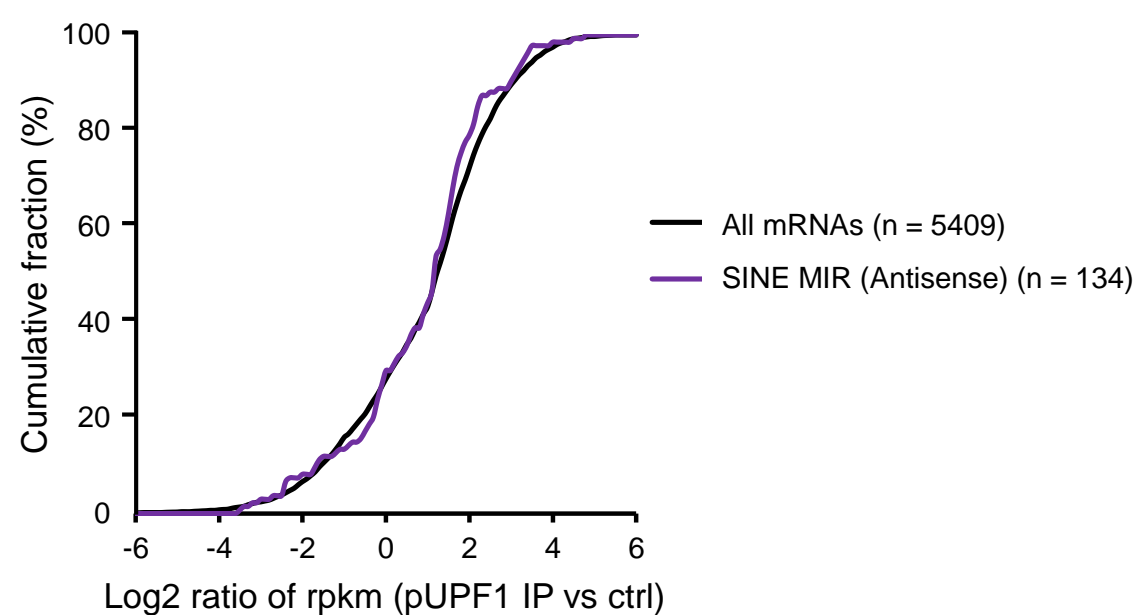

### SINE (only Alu) (Antisense)

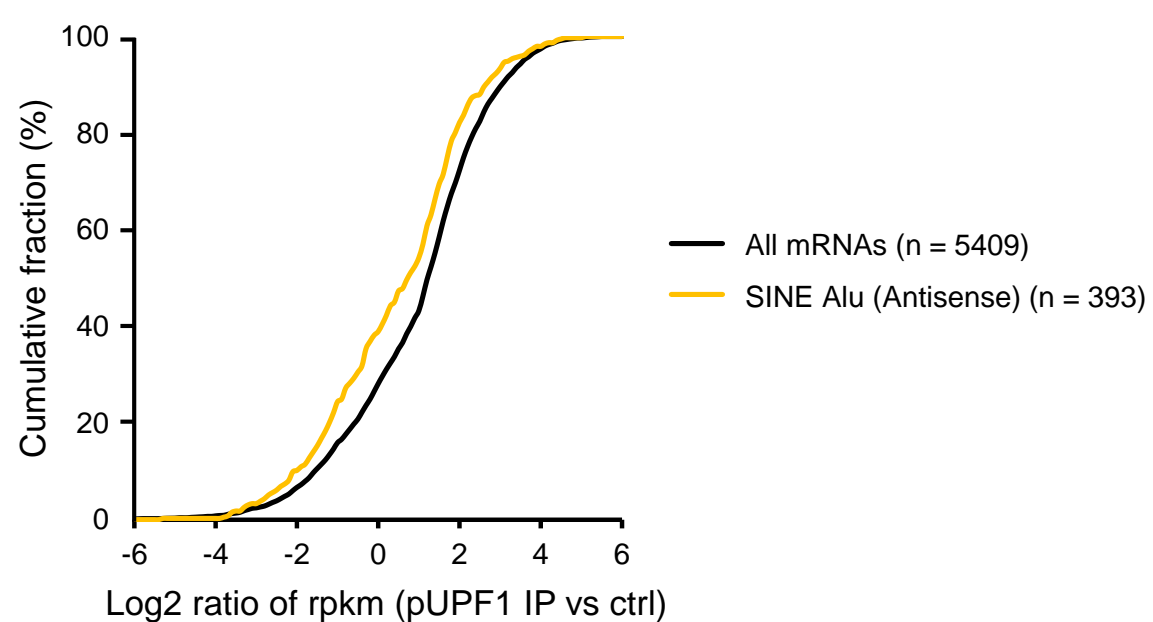

Supplement: supp_gr.206060.116_Supplemental_Fig_S9.pdf [file supp_gr.206060.116_Supplemental_Fig_S9.pdf]
