# Supplementary material for: A GC-rich sequence feature in the 3′ UTR directs UPF1-dependent mRNA decay in mammalian cells
Source: PubMed Central journal article supplement — Genome Res. 2017 Mar;27(3):407–18. doi: 10.1101/gr.206060.116 (PMC5340968; doi:10.1101/gr.206060.116), 2017-03
Supplement: supp_gr.206060.116_Supplemental_Fig_S6.pdf [file supp_gr.206060.116_Supplemental_Fig_S6.pdf]

# Supplemental Fig S6.

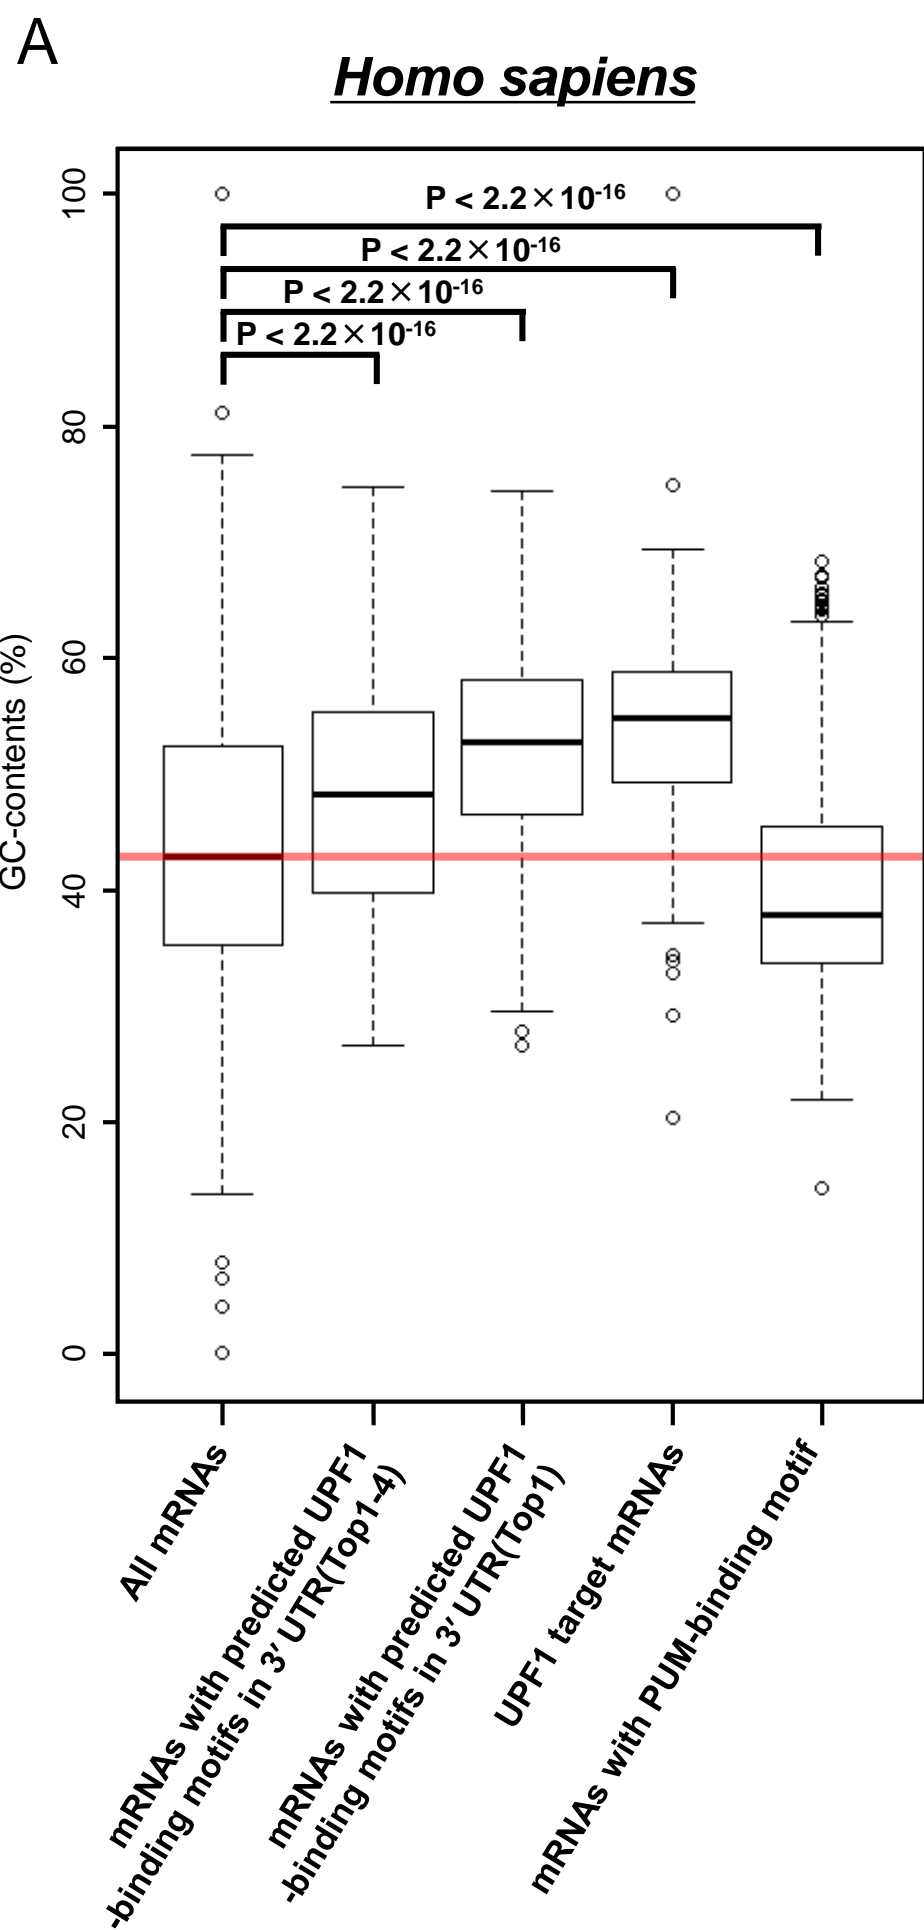

**GC-contents (3' UTR): Median / Mean**

All mRNAs: 42.9 / 43.9

mRNAs with predicted UPF1-binding motifs  
in 3' UTR (Top1-4): 48.2 / 47.8

mRNAs with predicted UPF1-binding motifs  
in 3' UTR (Top1): 52.7 / 51.8

UPF1 target mRNAs: 54.8 / 53.9

mRNAs with PUM-binding motif in 3'UTR: 37.9 / 40.2

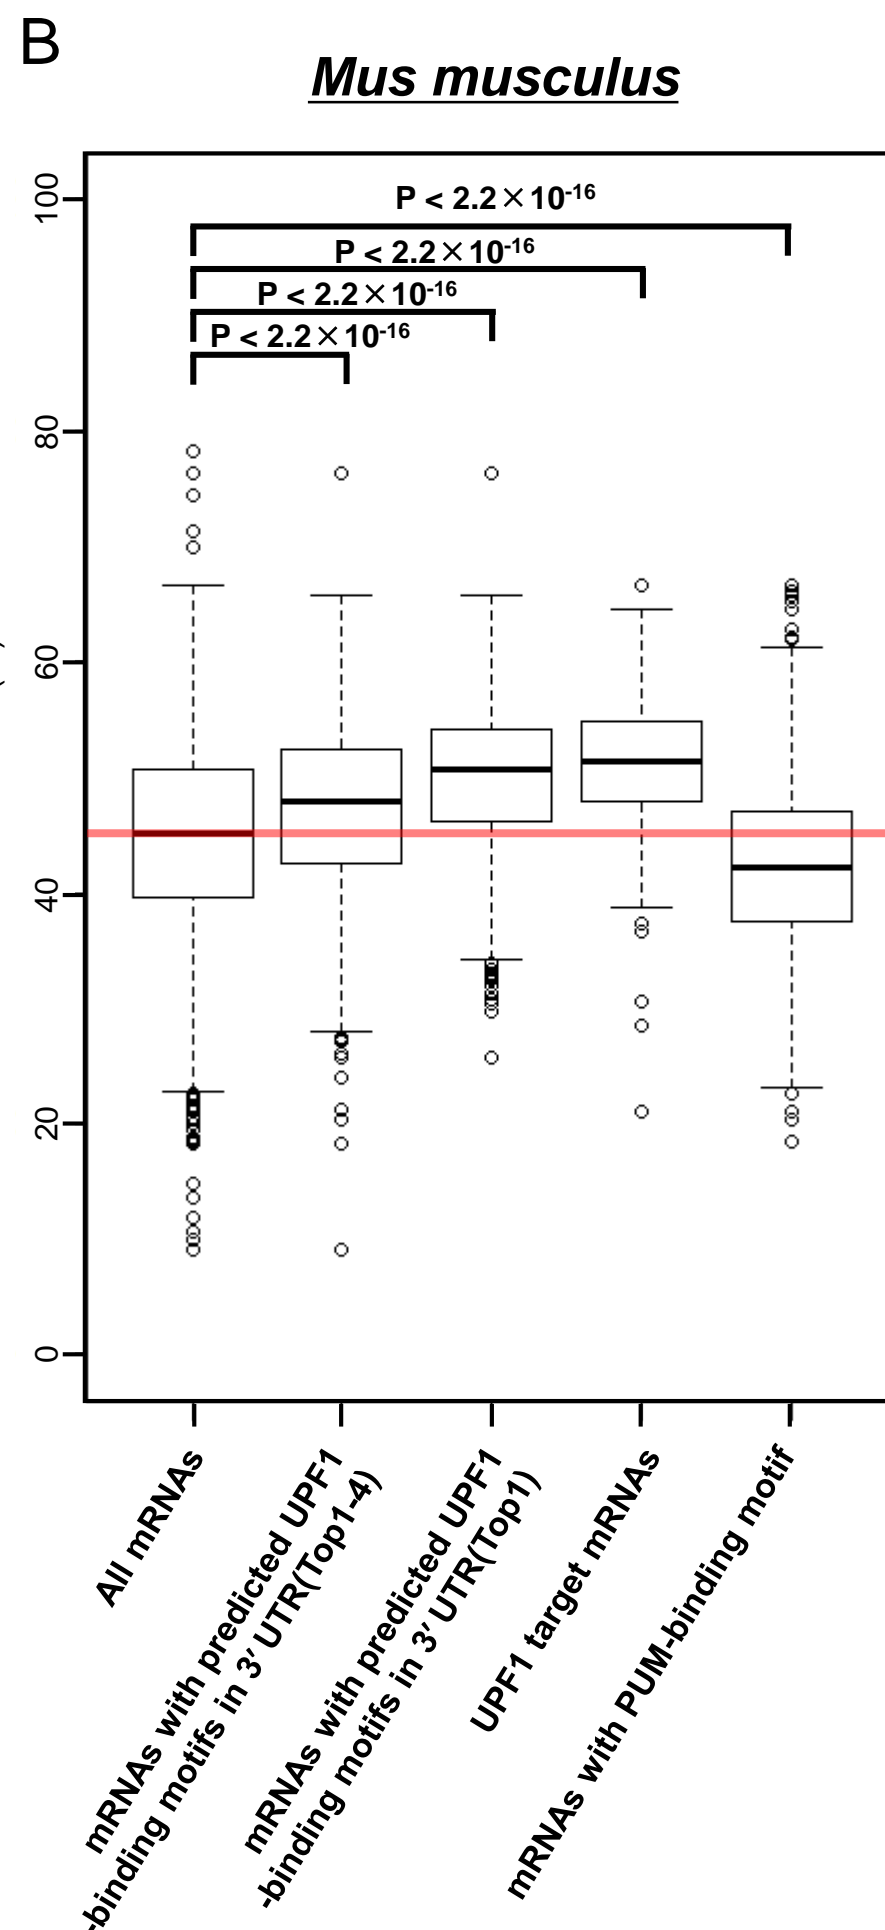

**GC-contents (3' UTR): Median / Mean**

All mRNAs: 45.2 / 45.0

mRNAs with predicted UPF1-binding motifs  
in 3' UTR (Top1-4): 47.9 / 47.3

mRNAs with predicted UPF1-binding motifs  
in 3' UTR (Top1): 50.6 / 49.9

UPF1 target mRNAs: 51.3 / 51.1

mRNAs with PUM-binding motif in 3'UTR: 42.1 / 42.6
