# Supplementary material for: A GC-rich sequence feature in the 3′ UTR directs UPF1-dependent mRNA decay in mammalian cells
Source: PubMed Central journal article supplement — Genome Res. 2017 Mar;27(3):407–18. doi: 10.1101/gr.206060.116 (PMC5340968; doi:10.1101/gr.206060.116), 2017-03
Supplement: supp_gr.206060.116_Supplemental_Fig_S10.pdf [file supp_gr.206060.116_Supplemental_Fig_S10.pdf]

## Supplemental Fig S10.

### GADD45B 3'UTR sequence in pTET-BBB+GADD45B 3'UTR vector

UUGAGUUGCUGCCACAAACAAAAAUACAAUAAAUUUUGAACCCCCUCCCCCCAGCACAACCCCCCAAACAAC  
CCAACCCACGAGGACCAUCGGGGGCAGAGUCGUUGGAGACUGAAGAGGAAGAGGAGGAGAAGGGGAGUGAGCGG  
CCGCCCCAGGGCGGAGAUCCAGGAGCUGGCGGCCGCCGAUCAGAUUGGAGAAGGGGGGACCCAGGCCAGCAGGAGAC  
AGGACCCCCGAAGCUGAGGCCUUGGGGAUGGAGCAGAAGCCGGAGUGGCGGGGCACGCUGCCGCCUCCCCAUCACGG  
AGGGUCCAGACUGUCCACUCGGGGGUGGAGUGAGACUGACUGCAAGCCCCACCCUCCUUGAGACUGGAGCUGG

: pUPF1-binding regions

Δsite1: **CUGAAG** -> AAAAAA

Δsite2: **GUGGCG** -> AAAAAAA

Δsite3: **GUGAGG** -> AACAAAA

Δsite4: **CUGGAGCUGG** -> AAAACAAAAA
