# Supplementary material for: A GC-rich sequence feature in the 3′ UTR directs UPF1-dependent mRNA decay in mammalian cells
Source: HighWire-hosted journal article supplement (doi:10.1101/gr.206060.116), 2016-12-09
Supplement: Supplemental_Material.docx [file Supplemental_Material.docx]

**Supplemental Material**

**Supplemental Figure legends**

**Supplemental Fig S1. The decay of NMD targets was faster than non-NMD targets and was significantly stabilized upon UPF1 depletion**

**(A)** Examples of mRNA decay kinetics of NMD targets (PTC-containing isoforms) in Control (Black line) or *UPF1* (Red line) siRNA transfected cells. RNA degradations were determined by the BRIC-seq method.

**(B)** RNA half-life distribution for PTC-containing isoforms (n=292) and all isoforms (n=292) in Control siRNA (left panel) or *UPF1* siRNA (right panel) transfected cells. P-values were calculated using the Wilcoxon rank sum test. Mean half-lives of all isoforms and PTC-containing isoforms in cells transfected with control siRNA were 7.2 h and 3.9 h, respectively. Mean half-lives of all isoforms and PTC-containing isoforms in cells transfected with UPF1 siRNA were 6.2 h and 6.8 h, respectively.

**Supplemental Fig S2. RNA expression levels of NMD target isoforms and all isoforms (containing NMD and non-NMD targets) upon UPF1, UPF2 or SMG1 depletion**

**(A)** Knockdown efficiencies of *UPF1*, *UPF2* or *SMG1*, as determined by qRT-PCR normalized by the *GAPDH* mRNA level. Values represent mean ± SD from triplicate experiments. Western blot analysis (most left panel) was carried out to confirm the depletion of target proteins by indicated siRNA. Each NMD factor was silenced by two independent siRNAs.

**(B–D)** Changes in RNA expression levels of NMD target isoforms (PTC-containing) and all isoforms upon *UPF1* (**B**), *UPF2* (**C**) or *SMG1* (**D**) silencing. RNA expression levels were qualified by qRT-PCR and normalized by the *GAPDH* mRNA level. *, p < 0.05 (Student’s t-test) for the comparison of the mRNA expression in the control conditions with the indicated knockdown conditions. Values represent mean ± SD from triplicate experiments.

**(E)** Schematic presentation of normal isoforms and PTC-containing isoforms. Thick and thin blocks indicate the coding regions and the untranslated regions, respectively. Arrows indicate qRT-PCR primer pairs that specifically amplify normal (orange arrows) and PTC-containing isoforms (blue arrows).

**Supplemental Fig S3. The cumulative distribution of RNA stability and UPF1 co-IP efficiency (Related with Fig. 1B, 1C).**

**(A)** Cumulative distribution of changes in UPF1 targets (Red line) merged on Fig 1C. Changes in UPF1 binding were calculated as the number of mapped tags of RNA-seq immunoprecipitated with HA-UPF1 by reads per kilobase of transcript per million mapped reads [RPKM] / the number of mapped tag of input RNA-seq [RPKM] ≥ 2.

**(B)** Cumulative distribution of changes in UPF1 targets (Blue line) merged on Fig 1D. Change in RNA stability were determined by the following calculation: The half-life of each transcript in UPF1 depletion / the half-life of each transcript in control.

**Supplemental Fig S4. UPF1 target mRNAs were upregulated by knockdown of *UPF1*, *UPF2* or *SMG1***

**(A–C)** Changes in expression levels of indicated UPF1 target mRNAs in *UPF1* (**A**), *UPF2* (**B**) or *SMG1* (**C**) siRNA transfected cells. RNA expression levels were qualified using qRT-PCR and normalized by the *GAPDH* mRNA level. *, p < 0.05 (Student’s t-test) for the comparison of the mRNA expression in the control conditions with the indicated knockdown conditions. Values represent mean ± SD from triplicate experiments. **(D)** Determination of the direct binding of mRNAs to UPF1 by *in vivo* cross-linking analysis (CLIP). Fold enrichment of the indicated mRNAs in the endogenous-UPF1 immunoprecipitation fraction relative to input RNA (amount of the indicated mRNAs in the isolated total RNA from cells) is shown. qRT-PCR determined the relative mRNA levels, which were normalized to the *PGK1* mRNA levels. Values represent the mean ± SD from triplicate experiments. The dashed line indicates 2-fold enrichment in the endogeous-UPF1 immunoprecipitation. *, p < 0.05 (Student’s t-test) compared with the enrichment of *GAPDH* mRNA in UPF1 immunoprecipitation.

**Supplemental Fig S5. Prediction of UPF1-binding sites in the 3′ UTRs of UPF1 target RNAs**

**(A)** The distribution of mapped reads derived from RNAs associated with UPF1 in the indicated RNA regions.

**(B)** Examples of UPF1 association with *bona fide* UPF1 target genes. The y-axis indicates numbers of sequencing reads derived from RNAs associated with UPF1obtained from data of HITS-CLIP and eCLIP.

**(C)** Relative ratio of nucleotides in pUPF1-binding sites (data from HITS-CLIP and eCLIP) in the 3**′** UTRs of mRNAs.

**(D)** UPF1-binding motifs in 3**′** UTRs of UPF1 target mRNAs (predicted by the analysis of HITS-CLIP and eCLIP) were predicted using MEME software. The motif length was restricted to 5–8bp. The motif with the lowest p-value is shown.

**Supplemental Fig S6. GC-contents of the 3′ UTRs of UPF1 target mRNAs**

(**A, B**)GC-content in the 3**′** UTRs of all mRNAs (i); mRNAs with any of predicted UPF1-binding motifs [top1–4] (CCUGGGG, CCUGGGA, CCUGGAA, CCUGAGA) (ii); mRNAs with predicted UPF1-binding motifs [top1] (CCUGGGG) (iii); UPF1 target mRNAs (iv); and mRNAs with PUM1-binding motifs (UGUANAUA) (v) for *Homo sapiens* (**A**) and *Mus musculus* (**B**), respectively. P-values were calculated using the Wilcoxon rank sum test. Red lines indicate the median value of the GC contents of all mRNA.

**Supplemental Fig S7. Relationship of GC-content in the 3′ UTR of UPF1 target mRNAs (246 genes) with UPF1-dependent RNA decay and UPF1 binding-affinity**

(**A–C**) Cumulative distribution of changes in RNA stability following UPF1 depletion (**A**), differences in UPF1 association (**B**) and in p-UPF1 association (**C**) for all mRNAs (black lines) and mRNAs whose GC-contents in the 3**′** UTR are over 60% (red lines). P-values were calculated using the Wilcoxon rank sum test.

**Supplemental Fig S8. Mono-nucleotide and di-nucleotide contents in the 3′ UTR**

**(A)** Mono-nucleotide contents (A, U, C, G) and **(B)** Di-nucleotide contents (AA, AU, AG, AC, UA, UU, UC, UG, GA, GU, GC, GG, CA, CU, CC, CG) in the 3**′** UTR of UPF1 targets and other genes with more than 55 % GC-content (Median GC-content of UPF1 targets, see Supplemental Fig S6A). P-values between all mRNAs (All) and UPF1 targets (UPF1) were calculated using the Wilcoxon rank sum test ( *: p-value < 0.05).

**Supplemental Fig S9. Transposable elements in 3′ UTRs of UPF1 target mRNAs**

(**A**)Fraction of transposable elements (SINE (MIR and Alu), LINE, LTR, SINE (only MIR) and SINE (only Alu)) in the 3**′** UTRs of all mRNAs and UPF1 targets. Comparison between All mRNAs and UPF1 targets containing indicated transposable elements are shown in left panel. Comparison between All mRNAs and UPF1 targets with antisense sequences of indicated transposable elements are shown in right panels. Transposable elements inserted in the 3**′** UTR were identified by screening the RefSeq database with RepeatMasker 4.0.3. P-values were calculated using Fisher’s exact test (**: p-value < 0.001).

(**B–G**)Cumulative distribution of changes in RNA stability upon UPF1 depletion　(**B**, **C**) and difference in HA-UPF1 association (**D**, **E**) and p-UPF1 association (**F**, **G**) for all mRNAs or mRNAs with indicated transposable elements, respectively.

**Supplemental Fig S10. GADD45B 3′ UTR sequence in the pTET-BBB+GADD45B 3′ UTR vector**

Yellow highlighting indicates p-UPF1 binding regions obtained from genome-wide RNA footprinting for p-UPF1. site1–4 sequences (left side of the arrow) indicate the deleted motifs in the 3**′** UTR. These motifs were also substituted with adenylic acid (A) sequences (right side of the arrow) in the A stretch mutant GADD45B 3**′** UTR.

**Supplemental Fig S11. Insertion of p-UPF1 binding motifs did not destabilize non-UPF1 targets**

The decay of rabbit beta globin mRNA derived from pTET-BBB, pTET-BBB fused with AP2M1, EVL and HNRNPA2B1 3**′** UTR, pTET-BBB fused with AP2M1, EVL and HNRNPA2B1 3**′** UTR with mutation of indicated pUPF1-binding motifs were measured. The sequences of wild type 3**′** UTRs of AP2M1, EVL and HNRNPA2B1 and mutant type of them are described in the section of Plasmid Constructions.

**Supplemental Table S1. siRNAs used for gene knockdown and oligonucleotides used for qRT-PCR.**

**Supplemental Table S2. RNA half-lives of PTC-containing isoforms (NMD-sensitive) and all isoforms.**

**Supplemental Table S3. Lists of GC-contents, motifs in the 3′ UTRs, high-throughput sequencing data and repetitive elements.**

**Supplemental Table S4. Characterization of 246 UPF1 targets.**

**Supplemental Table S5. GO term enrichment analysis for UPF1 targets (246 genes)**

**Supplemental Table S6. The presence of GC-rich motifs in 246 UPF1 targets and all genes.**

**Supplemental Methods**

**Cell culture and siRNA transfection**

HeLa Tet-off cells (Clontech, Mountain View, CA) were cultured in Dulbecco’s modified Eagle’s medium (Wako, Osaka, Japan), supplemented with 10% fetal bovine serum (Thermo Fisher Scientific, Waltham, MA) and antibiotics at 37 °C in a humidified incubator with 5% CO2. Short interfering RNAS (siRNAs) were transfected into cells using Lipofectamine RNAiMAX (Thermo Fisher Scientific), according to the manufacturer’s protocol. Briefly, siRNA duplexes (final concentration, 10 nM) were transfected into cells, followed by incubation for 6 h in 37 °C / 5% CO2 and then medium was changed. The cells were then incubated for 48 h. The siRNA sequences are listed in Supplemental Table S1.

**Plasmid Constructions**

To construct the pTetBBB/GADD45B 3′ UTR vector, first strand cDNA was synthesized using total RNA isolated from HeLa Tet-off cells and SuperScript II Reverse Transcriptase (Thermo Fisher Scientific). PCR amplification was performed using the following primer set: 5**′**-GAAGATCTTGAGTTGCTGCCACAAACAA-3**′** (sense) and 5**′**-GAAGATCTCCAGCTCCAGTCTCAAGGA-3**′** (antisense), where the underlined sequence is the BglII restriction site. The PCR product was digested with BglII and inserted into BglII-digested pTetBBB vector.

To construct pTetBBB/GADD45B site1 (858–862 bp), site4 (1113–1122 bp) and site1site4 (858–862 bp / 1113–1122 bp), the synthesized DNA fragment of GADD45B mRNA (NM_015675.3, 742–1122 bp), deleted at site1 or site4 or site1site4 with BglII digestion sites in 5**′** and 3**′** ends, was prepared and produced by Eurofins Genomics. The three DNA fragments were inserted into BglII digested pTetBBB vector.

To construct pTetBBB/GADD45B site1site2site4 (858­–862 bp / 921–­927 bp / 1113­–1122 bp) and site1site3site4 (858­–862 bp / 985­–991 bp / 1113–1122 bp), pTetBBB/GADD45B site1site4 was used as a template for PCR amplification, and site-directed mutagenesis was performed using the following primer sets: 5**′**-GCCGCCGATCAGATGGAGA-3**′** (sense) and 5**′**-TCCTGGATCTCCGCCCTG-3**′** (antisense) for deleting site2 and 5**′**-CCTTGGGATGGAGCAGAAG-3**′** (sense) and 5**′**-TTCGGGGGTCCTGTCTCC-3**′** (antisense) to deleting site 3.

To construct pTetBBB/GADD45B site1site2site3site4 (858–862 bp / 921–927 bp / 985–991 bp / 1113–1122 bp), pTetBBB/GADD45B site1site2site4 was used as a template for PCR amplification and site-directed mutagenesis was performed using the following primer set: 5**′**-CCTTGGGATGGAGCAGAAG-3**′** (sense) and 5**′**-TTCGGGGGTCCTGTCTCC-3**′** (antisense) to delete site 3. The 5**′** and 3**′** ends of the PCR products were phosphorylated using T4 polynucleotide kinase (Toyobo, Osaka, Japan) and self-ligated.

To construct the adenine substitution mutant for site1-4 of pTetBBB/GADD45B, the synthesized DNA fragment of GADD45B mRNA, substituted at site1-4 with BglII digestion sites in 5**′** and 3**′** ends, was prepared and produced by Eurofins Genomics. The DNA fragment was inserted into BglII digested pTetBBB vector.

To construct pTET-BBB fused with AP2M1, EVL and HNRNPA2B1 3**′** UTR and pTET-BBB fused with AP2M1, EVL and HNRNPA2B1 3**′** UTR substituted with indicated pUPF1-binding motifs, the synthesized DNA fragment of them was prepared and produced by Eurofins Genomics. The DNA fragment was inserted into BglII digested pTetBBB vector.

The cloned sequences are shown as below:

HNRNPA2B1 3**′** UTR

AGATCTTAGGAGAGGATGAGAGCCCAGAGGTAACAGAACAGCTTCAGGTTATCGAAATAACAATGTTAAGGAAACTCTTATCTCAGTCATGCATAAATATGCAGTGATATGGCAGAAGACACCAGAGCAGATGCAGAGAGCCATTTTGTGAATGGATTGGATTATTTAATAACATTACCTTACTGTGGAGGAAGGATTGTAAAAAAAAATGCCTTTGAGACAGTTTCTTAGCTTTTTAATTGTTGTTTCTTTCTAGTGGTCTTTGTAAGAGTGTAGAAGCATTCCTTCTTTGATAATGTTAAATTTGTAAGTTTCAGGTGACATGTGAAACCTTTTTTAAGATTTTTCTCAAAGTTTTGAAAAGCTATTAGCCAGGATCATGGTGTAATAAGACATAACGTTTTTCCTTTAAAAAAATTTAAGTGCGTGTGTAGAGTTAAGAAGCAGATCT

HNRNPA2B1 3**′** UTR with pUPF1-binding motifs (substituted sequences are shown as underlined bold font)

AGATCTTAGGAGAGGATGAGAGCCCAGAGGTAACAG**CCTGGGG**TCAGGTTATCGAAATAACAATGT**CCTGGGG**ACTCTTATCTCAGTCATGCATAA**CCTGGGGG**TGATATGGCAGAAGACACCAGA**CCTGGGG**CAGAGAGCCATTTTGTGAATGGA**CCTGGGG**ATTTAATAACATTACCTTACTGT**CCTGGGG**GGATTGTAAAAAAAATGCCTTT**CCTGGGG**TTTCTTAGCTTTTTAATTGTTGT**CCTGGGG**TAGTGGTCTTTGTAAGAGTGTAG**CCTGGGG**CCTTCTTTGATAATGTTAAATTT**CCTGGGG**TCAGGTGACATGTGAAACCTTTT**CCTGGGG**TTTTCTCAAAGTTTTGAAAAGCT**CCTGGGG**AGGATCATGGTGTAATAAGACAT**CCTGGGG**TTCCTTTAAAAAAATTTAAGTGC**CCTGGGG**GAGTTAAGAAGCAGATCT

AP2M1 3**′** UTR

AGATCTCTGCCACTAGGCAGCTAGCCCACCTCCCCAGCCACCCTCCTCCACAGGTCCAGGTGCCGCTCCCTCCCCCACCACACATCAGTGTCTCCTCCCTCCTGCTTTGCTGCCTTCCCTTTGCACCAGCCCGAGTCTAGGTCTGGGCCAAGCACATTACAAGTGGGACCGGTGGAGCAGCCCCTGGGCTCCCTGGGCAGGGGAGTTCTGAGGCTCCTGCTCTCCCATCCACCTGTCTGTCCTGGCCTAATGCCAGGCTCTGAGTTCTGTGACCAAAGCCAGGTGGGTTCCCTTTCCTTCCCACCCCTGTGGCCACAGCTCTGGAGTGGGAGGGTTGGTTGCCCCTCACCTCAGAGCTCCCCCAAAGGCCAGTAATGGATCCCCGGCCTCAGTCCCTACTCTGCTTTGGGATAGTGTGAGCTTCATTTTGTACACGTGTGACTTCGTCCAGTTACAAACCCAATAAACTCTGTAGAGTGGAGATCT

AP2M1 3**′** UTR with pUPF1-binding motifs (substituted sequences are shown as underlined bold font)

AGATCTCTGCCACTAGGCAGCTAGCCCACCTCCCCA**CCTGGGG**TCCTCCACAGGTCCAGGTGCCGC**CCTGGGG**CCCACCACACATCAGTGTCTCCT**CCTGGGG**GCTTTGCTGCCTTCCCTTTGCAC**CCTGGGG**AGTCTAGGTCTGGGCCAAGCACA**CCTGGGG**TGGGACCGGTGGAGCAGCCCCTG**CCTGGGG**TGGGCAGGGGAGTTCTGAGGCTC**CCTGGGG**CCCATCCACCTGTCTGTCCTGGC**CCTGGGG**CAGGCTCTGAGTTCTGTGACCAA**CCTGGGG**TGGGTTCCCTTTCCTTCCCACCC**CCTGGGG**CACAGCTCTGGAGTGGGAGGGTT**CCTGGGG**CCTCACCTCAGAGCTCCCCCAAA**CCTGGGG**AATGGATCCCCGGCCTCAGTCCC**CCTGGGG**CTTTGGGATAGTGTGAGCTTCAT**CCTGGGG**ACGTGTGACTTCGTCCAGTTACA**CCTGGGG**TAAACTCTGTAGAGTGGAGATCT

EVL 3**′** UTR

AGATCTGGGGCCGGCCTCGCTGCGCTGATTCGTCGAGCCCATCCGGCGACAGAGGACAGCCAGAAGCCCAGCCAGCCCCAGACTCCAGTGCACCAGAGCACGCACAGGAGCCTGGGCGCGCTGCTGTGAAACGTCCTGACCTGTGATCACACATGACAGTGAGGAAACCAAGTGCAACTCCTGGGTTTTTTTAGATTCTGCCTGACACGGAACACCAGGTCTGCTCGTCTTTTTTGTGTTTTATATTTGCTTATTTAAGGTACATTTCTTTGGGTTTCTAGAGACGCCCCTAAGTCACCTGCTTCATTAGACGGTTTCCAGGTTTTCTCCCAGGTGACGCTGTTAGCGCCTCAGCTGGCGGTGACAGCCGGCCCAGCGTGGCGCCACCACACACCGCAGAGCTGTCCAGGCACAGCTCCGTCCCCAGCGCTCATGGTGTTGAAACTGTCTGTCATGCACCACGGTGTCTGTGTCCACACAGTAATAAACGGTTTACTGTCCGCAGATCT

EVL 3**′** UTR with pUPF1-binding motifs (substituted sequences are shown as underlined bold font)

AGATCTGGGGCCGGCCTCGCTGCGCTGATTCGTCGA**CCTGGGG**CGGCGACAGAGGACAGCCAGAAG**CCTGGGG**AGCCCCAGACTCCAGTGCACCAG**CCTGGGG**ACAGGAGCCTGGGCGCGCTGCTG**CCTGGGG**TCCTGACCTGTGATCACACATGA**CCTGGGG**GAAACCAAGTGCAACTCCTGGGT**CCTGGGG**GATTCTGCCTGACACGGAACACC**CCTGGGG**CTCGTCTTTTTTGTGTTTTATAT**CCTGGGG**TTTAAGGTACATTTCTTTGGGTT**CCTGGGG**ACGCCCCTAAGTCACCTGCTTCA**CCTGGGG**GTTTCCAGGTTTTCTCCCAGGTG**CCTGGGG**TAGCGCCTCAGCTGGCGGTGACA**CCTGGGG**CAGCGTGGCGCCACCACACACCG**CCTGGGG**GTCCAGGCACAGCTCCGTCCCCA**CCTGGGG**TGGTGTTGAAACTGTCTGTCATG**CCTGGGG**GTGTCTGTGTCCACACAGTAATA**CCTGGGG**TACTGTCCGCAGATCT

**RNA-immunoprecipitation sequencing (RIP-seq)**

HA-tagged UPF1 plasmid was transfected into HeLa Tet-off cells using Lipofectamine 2000 (Thermo Fisher Scientific), according to the manufacturer’s protocol. The next day, cells were harvested and washed in cold PBS. The cell pellet was resuspended in RIPA buffer [50 mM Tris-HCl (pH 8), 150 mM NaCl, 1 mM EDTA, 0.1% SDS, 1% Triton X-100, 0.1% DOC, 0.5 U/μL RNasin plus RNase inhibitor (Promega, Madison, WI) and protease inhibitor cocktail (Sigma, St Louis, MO)], and then sonicated using a Bioruptor UCD-250 (Cosmo Bio, Tokyo, Japan). The supernatants were obtained by centrifugation, and used for immunoprecipitation using an anti-HA High Affinity rat antibody (Roche, Mannheim, Germany, cat# 3F10). Antibodies were incubated with Dynabeads protein G (Thermo Fisher Scientific) for 1 h at 4 °C, followed by washing three times in RIPA buffer. The supernatants were mixed with antibody-bead conjugates and rotated for 2 h at 4 °C. Beads were washed three times in cold RIPA buffer. ISOGEN LS (Nippon Gene, Tokyo, Japan) was then added, followed by RNA isolation according to the manufacturer’s protocol. The isolated RNA was used for high-throughput sequencing. A RIP-seq complementary DNA library was prepared from 1µg of total RNA using the mRNA Seq Sample Preparation Kit (Illumina, San Diego, CA), according to the manufacturer’s protocol. Thirty-six base pair single-end read RNA-seq tags were generated using Illumina HiSeq 2000, according to the standard protocol. The fluorescent images were processed to nucleotide sequences using the analysis Pipeline supplied by Illumina.

**Quantitative real-time reverse transcription PCR (qRT-PCR)**

Isolated total RNAs were reverse-transcribed into the complementary DNAs (cDNAs) using the PrimeScript RT Master Mix (Takara, Shiga, Japan). The targeted cDNAs were amplified using SYBR Premix Ex Taq II (Takara), according to the manufacturer’s protocol. qRT-PCR analysis was performed using a Thermal Cycler Dice Real Time System (Takara). The RNA expressions for each mRNA measured by qRT-PCR were normalized by the *GAPDH* mRNA expression level. The primer sets for qRT-PCR are listed in Supplemental Table S1.

**In vivo cross-linking analysis (CLIP)**

Cells were treated for 12 h with 150 μm 4**′**-thio-uridine The next day, the cells were harvested and washed in cold PBS, followed by irradiation on ice with 360 nm UV light. The cell pellets were resuspended in 200 μl of lysis buffer (2% SDS, 50 mM Tris-HCl (pH 8), 1 mM EDTA, 1 mM DTT) and boiled at 95 °C for 5 min. After dilution with four volumes of dilution buffer (1.25% NP-40, 0.625% DOC, 62.5 mM Tris-HCl (pH 8), 1.75 mM EDTA, 187.5 mM NaCl), each sample was gently sonicated three times and centrifuged for 90 min at 14,000×g, 4 °C. The supernatants were obtained by centrifugation and used for immunoprecipitation using an anti-UPF1 goat antibody (Bethyl, Montgomery, CA, USA, A300-038A). Antibodies were incubated with Dynabeads protein G (Thermo Fisher Scientific) for 3 h at 4 °C, followed by washing three times in NET2 buffer (50mM Tris-HCl (pH 8), 100 mM NaCl, 0.05% NP40, 0.5 mM DTT). The supernatants were mixed with antibody-bead conjugates and rotated for 3 h at 4 °C as described above. The beads were then washed five times in NET2 buffer. ISOGEN LS (Nippon Gene) was then added, followed by RNA isolation according to the manufacturer’s protocol. The levels of transcripts of interest were determined by qRT-PCR.

**mRNA decay assay**

HeLa Tet-off cells were transfected with 975ng of pGL4.13[luc2/SV40] plasmid (Promega), which produce Luciferase to control for transfection efficiency, and 25 ng of a Tet-responsive reporter construct which encoded the rabbit beta globin transcript (kindly donated by Dr. Ann-Bin Shyu). The reporter constructs were pTetBBB containing the rabbit beta globin coding region and the 3**′** UTR, and pTetBBB/GADD45B containing the rabbit beta globin coding region and the GC-rich region of GADD45B 3**′** UTR. After 24 h, 1 µg/ml doxycycline was added to the medium to stop transcription from the tet-responsive promoter. Total RNAs were isolated at 0, 2, 4, and 6 h after doxycycline treatment using RNAiso Plus (Takara). qRT-PCR was performed to measure Luciferase and beta globin mRNA expression levels at each time point, and to determine the relative RNA remaining. For each time point, the beta globin mRNA expression level was normalized to the Luciferase mRNA level.

**Preparation of GST-human UPF1 protein**

GST-human UPF1 was induced in *Escherichia coli* strain BL21-CodonPlus (DE3)-RIPL by 3hr of incubation in the presence of 1mM IPTG. The bacterial body was sonicated in GST buffer [50mM Tris-HCl (pH = 8), 1M NaCl, 5% Glycerol] containing 1mM PMSF, 2 mM DTT and 4 mg Lysozyme. The obtained lysate was clarified by centrifugation and then incubated with Glutathione Sepharose 4B (GE Healthcare, England, 17075601) for 1 h at 4 °C. The beads were washed once GST buffer containing 1mM PMSF, 2 mM DTT, and twice with GST buffer containing 2 mM DTT. GST-human UPF1 was eluted with GST elusion buffer [50 mM Tris-HCl (pH = 8), 150 mM NaCl, 5% Glycerol, 10mM reduced L-Glutathione (Sigma, St Louis, MO, G4251) and 1mM DTT]. The eluted recombinant proteins were dialyzed with dialysis buffer (50 mM Tris-HCl (pH = 8), 150 mM NaCl, 5% Glycerol and 1 mM DTT) for 2 h.

**RNA electrophoretic mobility shift assay**

A uniformly 32P -labeled 393-nt RNAs were produced by *in vitro* transcription of a pGEM-T vector harboring the GADD45B 3**′** UTR sequence or its adenine substitution mutant at sites1–4 using T7 RNA polymerase (Takara) and [-32P] UTP (800 Ci/mmol) (PerkinElmer, Waltham, MA, USA). Binding reaction containing binding buffer [20mM HEPES, 50mM KAc, 2.5mM Mg(Ac)2, 2mM DTT, 1.5% BSA, 10% Glycerol, pH7.0], 0.5 pmol labeled RNA and 500ng UPF1 were incubated for 15 min at 10 °C. Alternatively, after incubation, 1 pmol of non-labeled RNA was added to the binding reaction and incubated for another 15 min. The RNA-protein complexes formed were separated by electrophoresis through a 4.5% native PAGE gel (60:1 acrylamide:bisacrylamide in 0.5 × TBE containing 10% glycerol). Gels were dried and autoradiographed using an imaging plate (Fuji Film). Development was carried out using an FLA9000 laser scanner (Fuji Film)

**Preprocessing, mapping and quantification of sequencing data**

Low quality reads were discarded using FASTX-toolkit and then reads containing fewer than 10 bp were eliminated using Bowtie (Langmead et al. 2009). The filtered reads were mapped to the reference human genome (hg19) and transcriptome from RefSeq downloaded from illumine iGenomes (downloaded on 2nd July 2013) using TopHat (version 2.0.12) (Kim et al. 2013). Mapped reads were quantified to measure the RNA expression level for each gene using Cufflinks (version 2.1.1) (Trapnell et al. 2010). The abundance of RefSeq transcripts was calculated from BRIC-seq and RIP-seq sequence reads, based on reads per kilobase of exon model per million mapped reads (RPKM), as a means of normalizing for gene length and depth of sequencing. We used 8426 RefSeq transcripts that passed the cutoff of at least greater than 1RPKM for each data analysis.

**PTC-containing isoform analysis**

mRNA candidates that harbor PTCs were selected from RefSeq and Gencode v19 annotation data, which were annotated with “nonsense_mediated_decay”. PTC-containing mRNAs that had additional exons or had ≥100 bp 5**′**/3**′** splice-site extensions resulting in PTC-containing mRNAs were extracted from these candidates. The GTF file of these PTC-containing mRNAs was merged with the GTF file of RefSeq annotation such that the file only contained mRNAs with NM accession numbers. The expression level of PTC-containing mRNA isoforms was estimated using the above GTF file and Cufflinks software.

**GC-content estimation**

The ortholog RefSeq gene dataset was downloaded from the RefSeq FTP site [http://​ftp.​ncbi.​nlm.​nih.​gov/​refseq/​supplemental/​ProtCore/​SM1.​txt] (Fong et al. 2013). Mouse orthologous genes for human genes were extracted from the dataset. GC-contents in the 3**′** UTRs for human and mouse were calculated, based on RefSeq annotation data.

**Repetitive element analysis**

Repetitive elements inserted in 3**′** UTRs were identified by screening the RefSeq database with RepeatMasker 4.0.3.

**GO term enrichment analysis**

GO term enrichment analysis was performed using a Functional Annotation Chart in DAVID Bioinformatics Resources 6.7 (http://david.abcc.ncifcrf.gov/home.jsp) (Huang et al. 2009).

**References for Supplemental Materials**

Fong JH, Murphy TD, Pruitt KD. 2013. Comparison of RefSeq protein-coding regions in human and vertebrate genomes. *BMC Genomics*. **14**: 654.

Huang W, Sherman BT, Lempicki RA. 2009. Systematic and integrative analysis of large gene lists using DAVID bioinformatics resources. *Nat Protocol*. **4**: 44-57.
