# Supplementary material for: A GC-rich sequence feature in the 3′ UTR directs UPF1-dependent mRNA decay in mammalian cells
Source: HighWire-hosted journal article supplement (doi:10.1101/gr.206060.116), 2016-12-09
Supplement: Supplemental_Table_S3.xlsx [file Supplemental_Table_S3.xlsx]

## Sheet: Supplemental Table S3
Supplemental Table S3. lLists of GC-contents, motifs in the 3' UTRs, Highhigh-throughput sequencing data and repetitive elements.
Gene information			GC-contents						Motifs in 3'UTR			High-throughput sequencing data								Transposable element
Gene_symbol	RefSeq_ID (Human)	RefSeq_ID (Mouse)	GC-content_5UTR (Mouse)	GC-content_CDS (Mouse)	GC-content_3UTR (Mouse)	GC-content_5UTR (Human)	GC-content_CDS (Human)	GC-content_3UTR (Human)	Predicted_UPF1_motifs (Top4: CCUGGGG, CCUGGGA, CCUGGAA, CCUGAGA)	Predicted_UPF1_motifs (Top1: CCUGGGG)	PUM-binding_motifs (UGUANAUA)	RNA_HalfLife (hr)(siCTRL) [BRIC-seq/Tani et al]	RNA_HalfLife (hr)((siUPF1) [BRIC-seq/Tani et al]	FC_RNA_HalfLife log2(siUPF1/siCTRL) [BRIC-seq/Tani et al]	Fold_Enrichment log2(HA-UPF1-IP/Input) [RIP-seq]	Fold_Enrichment log2(pUPF1-IP/Ctrl) [RNA footprint/Kurosaki et al.]	RNA_HalfLife (hr)((siCTRL) [BRIC-seq/maekawa et al.]	RNA_HalfLife (hr)((siSTAU1) [BRIC-seq/maekawa et al.]	FC_RNA_HalfLife log2(siSTAU1/siCTRL) [BRIC-seq/maekawa et al.]	SINE(+)	SINE(-)	SINE_Alu(+)	SINE_Alu(-)	SINE_MIR(+)	SINE_MIR(-)	LINE(+)	LINE(-)	LTR(+)	LTR(-)
AAAS	NM_001173466,NM_015665	NM_153416	60.9929	54.5399	32.3529	61.3497	57.404	27.2727	0	0	0	24	15.3063	-0.648914	-0.466479	NA	23.4438	12.6969	-0.884729	0	0	0	0	0	0	0	0	0	0
AACS	NM_023928	NM_030210	71.7791	58.2467	52.1246	81.5534	55.6216	50.8212	1	0	0	8.73438	15.1937	0.798702	2.44103	2.16596	5.27734	5.98438	0.181389	0	0	0	0	0	0	0	0	0	0
AADAT	NM_016228,NM_182662	NM_011834	57.3034	44.9922	31.477	68.7135	41.3928	33.5694	0	0	0	7.83281	8.37969	0.097366	-0.649602	NA	9.025	14.0844	0.642097	1	0	1	0	0	0	0	0	0	0
AAED1	NM_153698	NM_025370	76.9231	54.0382	33.5849	80.5556	53.7445	32.874	0	0	1	6.97344	4.2	-0.731481	-1.47623	NA	14.1125	23.3125	0.72413	0	0	0	0	0	0	1	0	0	0
AAGAB	NM_001271885,NM_001271886,NM_024666	NA	NA	NA	NA	43.038	45.2496	41.5191	0	0	0	8.18594	7.94688	-0.0427601	1.38742	3.01041	7.38125	7.12969	-0.0500262	0	0	0	0	0	0	0	0	0	0
AAMDC	NM_024684	NM_183251	60	52.5745	42.5287	59.1837	50.4065	40.5405	0	0	0	17.8062	24	0.430651	-2.23672	0.228903	24	24	0	0	0	0	0	0	0	0	0	0	0
AAMP	NM_001087	NM_146110	65.2174	57.5688	54.5685	69.0476	58.5441	53.7129	0	0	1	13.0906	8.9625	-0.546561	1.67133	7.24002	8.67656	7.20937	-0.267249	0	0	0	0	0	0	0	0	0	0
AAR2	NM_001271874,NM_015511	NA	NA	NA	NA	60.7407	56.7965	52.0903	1	0	0	2.38203	2.18203	-0.126521	2.11988	NA	1.82422	1.57422	-0.212643	0	0	0	0	0	0	0	0	0	0
AARS	NM_001605	NM_028274,NM_146217	63.4465	54.1108	57.9675	64.5455	53.2164	52.2936	0	0	0	8.62813	4.26094	-1.01788	1.20651	3.56227	6.92656	6.78281	-0.0302559	0	0	0	0	0	0	0	0	0	0
AARS2	NM_020745	NM_198608	69.2308	60.8902	53.0612	66.6667	61.6971	51.2356	1	0	0	5.4	4.81562	-0.165236	1.96219	14.2027	4.45312	3.41094	-0.38465	1	0	1	0	0	0	0	1	0	0
AARSD1	NM_001261434	NM_144829	52.8634	56.4165	50	68.9655	53.9144	43.2836	0	0	0	12.7094	10.5312	-0.271217	-0.512085	8.64725	24	24	0	0	0	0	0	0	0	0	0	0	0
AASDHPPT	NM_015423	NM_026276	63.7931	43.871	33.6876	72.6027	43.3333	32.1008	0	0	0	5.47656	2.43086	-1.1718	-0.49959	0.221153	7.79063	7.15	-0.123796	0	0	0	0	0	0	1	1	0	1
AATF	NM_012138	NM_019816	69.2857	49.6521	42.5743	69.7211	50.208	58.9372	1	0	0	7.58281	4.41875	-0.779095	-1.67923	10.4495	8.08437	7.34687	-0.138006	0	0	0	0	0	0	0	0	0	0
ABCA2	NM_001606,NM_212533	NM_007379	86.5672	57.2035	57.3795	87.8378	63.1377	64.1727	1	0	1	7.775	9.29063	0.256933	1.21557	8.98926	5.29609	6.81562	0.363917	0	0	0	0	0	0	0	0	0	0
ABCA7	NM_019112	NM_013850	NA	58.9506	51.8182	66.2338	64.6018	65.0685	1	0	0	4.3	7.05781	0.714885	1.39489	3.34438	2.29473	3.22187	0.489578	0	0	0	0	0	0	0	0	0	0
ABCB10	NM_012089	NM_019552	76.699	58.2402	44.5105	81.3953	56.2923	28.9919	0	0	0	10.0922	4.34844	-1.21467	0.0274938	1.2	8.17656	7.90469	-0.048786	0	0	0	0	0	0	0	0	0	0
ABCB6	NM_005689	NM_023732	63.1387	55.5556	45.3988	74.1325	58.2839	45.3488	0	0	0	10.325	8.69375	-0.248091	0.600843	NA	5.89687	5.68672	-0.0523541	0	0	0	0	0	0	0	0	0	0
ABCB7	NM_001271696,NM_001271697,NM_001271698,NM_001271699,NM_004299	NM_009592	50	44.6215	33.4022	52.9412	44.3855	26.2626	0	0	0	24	11.2188	-1.09712	-1.67537	NA	22.5125	24	0.0923081	0	0	0	0	0	0	0	0	0	0
ABCB8	NM_007188	NM_029020	52.0958	58.2173	55.6541	61.2903	63.0042	57.9942	7	2	0	14.0875	14.225	0.014013	0.858327	3.99127	6.66406	19.975	1.58372	0	0	0	0	0	0	1	1	0	0
ABCB9	NM_001243013,NM_001243014,NM_019624,NM_019625,NM_203444	NM_019875	70.7113	60.4194	54.9868	69.0323	61.9296	59.7388	1	1	0	7.64375	7.70937	0.0123333	2.02292	1.01742	3.95078	4.03125	0.0290894	0	0	0	0	0	0	0	0	0	0
ABCC1	NM_004996	NM_008576	86.1111	52.9976	46.7497	87.4286	56.5057	47.7121	6	1	0	6.54297	5.07969	-0.365206	1.07407	3.55132	4.08047	5.17734	0.343477	0	0	0	0	0	0	0	0	0	0
ABCC10	NM_001198934,NM_033450	NM_170680	69.2308	60.364	52.7881	59.5349	61.3083	49.7006	0	0	0	4.68359	6.85156	0.548817	1.27925	7.37009	2.36797	3.725	0.65359	0	0	0	0	0	0	0	0	0	0
ABCC4	NM_001105515,NM_005845	NM_001033336,NM_001163675	79.0909	51.634	43.3272	79.8319	44.4696	35.4525	1	0	1	16.1094	13.7375	-0.229781	0.0761845	NA	9.39531	13.8063	0.555308	0	0	0	0	0	0	0	0	0	0
ABCC5	NM_001023587,NM_005688	NM_013790	57.7889	51.009	48.2706	60	51.414	47.2141	1	1	1	4.06953	3.36172	-0.275663	0.225922	1.62941	2.94766	4.01016	0.44409	0	0	0	0	0	0	0	0	0	0
ABCD1	NM_000033	NM_007435	61.9816	57.1687	55.5334	69.1729	64.79	66.7965	1	1	0	7.94688	6.55312	-0.278205	2.60632	NA	5.75156	5.88125	0.0321688	0	0	0	0	0	0	0	0	0	0
ABCD3	NM_001122674,NM_002858	NM_008991	73.1959	45.101	39.0318	76.4706	41.7677	31.8123	1	0	0	11.8438	7.40625	-0.677311	-0.456063	0.895046	13.1438	15.5219	0.239926	0	0	0	0	0	0	0	0	0	0
ABCD4	NM_005050,NR_003256	NM_008992	68.4932	54.5305	48.2143	65.7895	56.0681	41.5541	0	0	0	5.00938	5.73594	0.195399	1.24708	6.61181	3.07773	2.61992	-0.232345	0	0	0	0	0	0	0	0	0	0
ABCE1	NM_001040876,NM_002940	NM_015751	60.8889	40.8889	36.8568	57.3363	38.8889	30.9072	0	0	0	12.8344	4.25312	-1.59342	-0.31502	0.103846	12.7188	22.7875	0.841286	0	0	0	0	0	0	0	1	0	0
ABCF1	NM_001025091,NM_001090	NM_013854	74.4186	54.7733	55.4636	70.5263	53.9191	48.1348	0	0	0	6.825	5.26875	-0.373368	0.373057	7.52632	6.04609	7.86094	0.378698	0	0	0	0	0	0	0	0	0	0
ABCF2	NM_005692,NM_007189	NM_001190443,NM_013853	68.9441	51.5633	54.8571	61.2613	51.2286	52.7494	2	1	0	7.24062	6.09844	-0.247674	0.79359	1.92443	7.9125	8.80312	0.153882	1	0	1	0	0	0	0	0	0	0
ABCF3	NM_018358	NM_013852	63.5417	53.3803	49.3056	68.4211	56.4789	59.5469	0	0	0	4.45859	4.08281	-0.127025	0.709557	7.075	2.96367	2.89453	-0.0340562	0	0	0	0	0	0	0	0	0	0
ABCG1	NM_004915,NM_016818,NM_207174,NM_207627,NM_207628,NM_207629	NM_009593	76.0684	56.7716	47.5871	86.7925	57.2214	45.1878	0	0	0	5.36172	3.57656	-0.584122	2.14498	NA	3.94141	2.0707	-0.92859	0	0	0	0	0	0	0	0	0	0
ABHD10	NM_001272069,NM_018394,NR_073570,NR_073571	NM_001272070,NM_172511	75	48.6577	37.5132	58.0645	46.5798	32.1797	0	0	1	4.68438	2.90859	-0.687535	-0.644597	NA	4.11016	6.0875	0.566657	0	0	0	0	0	0	0	0	1	1
ABHD11	NM_001145364,NM_148912,NM_148913,NR_026910,NR_026912	NM_145215	61.2591	56.8182	51.2821	71.9298	62.1308	52.381	0	0	0	4.73203	4.05	-0.224538	0.995419	NA	3.43516	3.69219	0.1041	1	0	1	0	0	0	0	0	0	0
ABHD12	NM_001042472,NM_015600	NM_024465	77.8351	51.5455	54.4408	79.5699	54.6366	60.8964	1	0	0	24	24	0	1.60684	4.38882	18.0594	10.65	-0.761895	0	0	0	0	0	0	0	0	0	0
ABHD14A	NM_015407	NM_145919,NM_001110271	58.8757	56.4926	52.6316	77.2727	62.2549	56.5934	1	0	0	24	24	0	-1.47946	NA	24	24	0	0	0	0	0	0	0	0	0	0	0
ABHD14B	NM_001146314,NM_001254753,NM_032750	NM_029631	56.3218	58.9258	50.7246	63.5447	62.8752	53.7118	0	0	0	24	24	0	0.569943	NA	24	24	0	0	0	0	0	0	0	0	0	0	0
ABHD16A	NM_001177515,NM_021160,NR_033488,NR_033489	NM_178592	79.4118	59.8092	43.5897	54.7541	58.9354	41.4449	0	0	0	11.8344	7.9625	-0.571691	-0.395494	5.3185	9.54063	8.98438	-0.0866656	0	0	0	0	0	0	0	0	0	0
ABHD16B	NM_080622	NM_183181	61.3861	56.6316	44.1767	59.1463	69.9291	57.8947	0	0	0	2.44062	24	3.29771	0.86052	NA	0.531836	0.643213	0.274315	0	0	0	0	0	0	0	0	0	0
ABHD2	NM_007011,NM_152924	NM_018811	57.551	54.1471	48.5052	57.8846	52.9734	45.8844	7	1	1	8.07188	6.69688	-0.269416	1.47945	0.833334	5.14297	8.55625	0.734377	1	0	1	0	1	0	0	0	0	0
ABHD3	NM_138340	NM_134130	60	51.3754	31.2112	79.2857	46.3415	27.0893	0	0	1	22.8062	7.30938	-1.64161	-1.63382	NA	11.0953	10.9203	-0.0229362	0	0	0	0	0	0	0	0	0	0
ABHD4	NM_022060	NM_134076	69.2308	54.4944	52.0579	68.1159	55.102	54.713	0	0	0	6.30391	17.075	1.43757	2.52473	NA	4.69375	3.51719	-0.416319	0	1	0	0	0	1	0	0	0	0
ABHD6	NM_020676	NM_025341	68.75	50.3462	46.8716	71.2195	51.3807	44.8916	0	0	0	3.58008	2.90469	-0.301608	1.04952	NA	2.1543	2.45391	0.187863	0	0	0	0	0	0	0	0	0	0
ABHD8	NM_024527	NM_022419	73.0769	61.5152	61.0766	75	64.0909	68.4906	1	0	0	4.96875	5.51094	0.149415	0.812627	NA	7.25625	3.90469	-0.894017	0	0	0	0	0	0	0	0	0	0
ABI1	NM_001012750,NM_001012751,NM_001012752,NM_001178116,NM_001178119,NM_001178120,NM_001178121,NM_001178122,NM_001178123,NM_001178124,NM_001178125,NM_005470	NM_001077190	54.386	48.8243	32.6087	62.9464	46.6108	30.6991	0	0	1	5.38125	4.01016	-0.424283	-0.71915	1.09109	6.35	10.2562	0.691675	0	0	0	0	0	0	0	0	0	0
ABI2	NM_005759	NM_198127	70.1087	49.9627	39.0997	74.8936	48.1793	38.9662	2	1	0	8.46875	8.84219	0.0622544	-0.513364	3.48219	7.93438	18.4625	1.21841	1	0	1	0	0	0	0	0	0	0
ABL1	NM_005157,NM_007313	NM_001283046,NM_001283047,NM_001112703	54.1401	57.9761	54.1413	0	59.0333	57.2791	1	0	0	3.375	3.27891	-0.041673	2.09391	12.6635	2.46406	2.22441	-0.147614	0	0	0	0	0	0	0	0	0	0
ABL2	NM_001136000,NM_001136001,NM_001168236,NM_001168237,NM_001168238,NM_001168239,NM_005158,NM_007314	NM_009595	NA	54.3815	NA	42.2222	50.8301	41.7352	4	1	4	2.43242	0.90564	-1.42538	0.613779	2.16363	2.85586	1.79356	-0.671103	1	1	1	0	1	1	0	0	0	0
ABLIM1	NM_001003407,NM_001003408,NM_002313,NM_006720	NM_178688	57.3333	54.1377	47.0942	57.9439	49.7076	43.1456	0	0	1	12.7094	16.4219	0.369726	0.115353	NA	22.25	24	0.109229	0	0	0	0	0	0	0	0	0	0
ABR	NM_001092,NM_001159746,NM_001256847,NM_021962,NR_046393	NM_198894	NA	53.0713	51.1608	75	55.9336	57.1819	4	1	0	6.36875	6.43594	0.0151402	2.18458	14.8353	4.86562	5.56406	0.193514	0	0	0	0	0	0	0	0	0	0
ABRACL	NM_021243	NM_028440	59.375	42.6829	32.5203	61.5	39.8374	29.5739	0	0	0	16.5188	4.05156	-2.02755	-2.08423	NA	24	24	0	0	0	0	0	0	0	0	0	0	0
ABT1	NM_013375	NM_013924	58.8235	58.2716	43.5484	60	61.4164	42.1652	0	0	0	1.70234	3.01992	0.826989	-0.103374	NA	1.77461	1.70059	-0.0614692	0	0	0	0	0	0	0	0	0	0
ABTB2	NM_145804	NM_178890	70.024	60.065	50.6567	69.4118	62.7031	53.5714	1	1	0	3.1707	2.54023	-0.319841	2.23085	NA	2.1166	2.38535	0.172452	0	0	0	0	0	0	0	0	0	0
ACAA1	NM_001130410,NM_001607,NR_024024	NA	NA	NA	NA	63.7681	60.1569	49.5549	0	0	0	24	23.7563	-0.0147273	1.32052	NA	24	24	0	0	0	0	0	0	0	0	0	0	0
ACAA2	NM_006111	NM_177470	67.9245	53.4338	47.3881	62.4685	46.1474	39.9417	0	0	0	24	13.75	-0.803603	-0.0530833	4.31963	24	24	0	0	0	0	0	0	0	0	0	0	0
ACACA	NM_198834,NM_198836,NM_198837,NM_198838,NM_198839	NM_133360	30.7692	48.4086	52.2936	59.1623	47.6211	49.6558	1	0	0	4.75078	6.28281	0.403246	1.55881	0.0821886	4.64062	8.475	0.868894	0	0	0	0	0	0	0	0	0	0
ACACB	NM_001093	NM_133904	NA	57.0845	54.5374	22.2222	55.9035	50.5099	2	1	0	1.91016	24	3.65127	1.5727	1.76316	2.6	3.20938	0.303781	0	1	0	1	0	0	0	0	0	0
ACAD11	NM_032169	NM_175324	58.6667	51.0684	41.3542	57.6316	44.5583	42.0168	0	0	0	24	10.7094	-1.16416	0.0497485	10.2154	24	24	0	1	0	1	0	0	0	0	0	0	0
ACAD8	NM_014384	NM_025862	56.6038	52.8986	37.9156	65.5738	55.6891	42.2646	1	1	0	7.42031	4.8875	-0.602383	1.71697	NA	4.02578	6.59063	0.711147	0	0	0	0	0	0	0	0	0	0
ACAD9	NM_014049,NR_033426	NA	NA	NA	NA	65.3465	53.6442	50.6903	2	0	0	12.8688	17.3125	0.427942	0.0908869	13.2269	10.4688	10.9437	0.064018	0	0	0	0	0	0	0	0	0	0
ACADM	NM_000016,NM_001127328	NA	NA	NA	NA	70.4651	40.8373	26.7916	0	0	0	17.525	6.30938	-1.47385	-1.86833	0.274513	16.1687	24	0.569826	0	0	0	0	0	0	0	0	0	0
ACADS	NM_000017	NA	NA	NA	NA	76.2712	62.3083	66.25	3	3	0	10.05	5.67422	-0.824702	2.32575	NA	8.00625	9.925	0.30994	0	0	0	0	0	0	0	0	0	0
ACADVL	NM_000018,NM_001033859,NM_001270447,NM_001270448	NA	NA	NA	NA	47.619	57.5847	53.5294	0	0	0	24	24	0	-0.00295802	4.4228	24	24	0	0	0	0	0	0	0	0	0	0	0
ACAP2	NM_012287	NM_030138	74.8988	46.5197	40.1983	75.1037	42.0625	33.2317	0	0	2	5.74688	4.14062	-0.472929	-0.349248	NA	6.25391	8.18125	0.387564	0	1	0	1	0	1	0	0	0	0
ACAP3	NM_030649	NM_207223	71.0297	56.7946	59.6899	85.1351	64.3912	66.1864	3	3	0	6.90469	8.35469	0.27501	2.16747	2.92351	4.51094	4.68828	0.0556316	0	0	0	0	0	0	0	0	0	0
ACAT1	NM_000019	NM_144784	70.0935	48.9412	42.0168	69.7368	44.1589	35.9173	0	0	0	24	24	0	-2.45765	0.389041	24	24	0	0	0	0	0	0	0	0	0	0	0
ACAT2	NM_005891	NA	NA	NA	NA	73.2824	47.9062	30.0885	0	0	0	24	12.1844	-0.978002	-2.12271	0.372301	24	24	0	0	0	0	0	0	0	0	0	0	0
ACBD3	NM_022735	NM_133225	72.8814	52.7883	39.0403	68.0851	51.6698	32.9363	0	0	2	3.18672	3.12188	-0.029659	-0.360951	1.11	3.73281	3.80313	0.0269221	0	0	0	0	0	0	0	0	0	0
ACBD5	NM_001042473,NM_001271512,NM_145698,NR_024150,NR_073195,NR_073196,NR_073197	NM_001102438	68.8119	46.1035	33.0989	64.3275	44.535	34.4765	0	0	2	4.42891	4.60859	0.0573763	-0.353949	NA	3.81406	5.20625	0.448916	0	1	0	1	0	0	0	0	0	0
ACBD6	NM_032360	NM_028250	72.2868	52.0612	41.8027	69.4042	48.881	34.9315	0	0	0	9.40156	6.75859	-0.476177	-1.5021	NA	12.1	15.9156	0.395437	0	0	0	0	0	0	0	0	0	0
ACD	NM_001082486,NM_001082487,NM_022914	NM_001012638	72.7273	58.1934	43.299	58.1602	64.3425	47.8723	0	0	0	14.7	8.85	-0.732067	0.275929	NA	7.65313	9.24531	0.272673	0	0	0	0	0	0	0	0	0	0
ACER3	NM_018367	NM_025408	69.3182	41.5423	35.5143	83.6538	41.5423	37.2233	0	0	0	7.45156	13.2063	0.825606	-0.403631	NA	NA	24	NA	1	0	1	0	0	0	0	0	0	0
ACIN1	NM_001164814,NM_001164815,NM_001164816,NM_001164817,NM_014977	NM_023190,NM_001085473	52.9801	55.1655	49.7354	60.7143	57.1274	49.5712	0	0	0	6.9375	4.12656	-0.749475	-0.393377	21.122	5.60234	5.11719	-0.130679	0	0	0	0	0	0	0	0	0	0
ACLY	NM_001096,NM_198830	NM_001199296	63.7555	54.5675	40.1796	67.4847	55.1119	38.914	1	0	0	24	14.3812	-0.738845	0.8192	4.90018	15.7562	14.975	-0.0733682	0	0	0	0	0	0	0	0	0	0
ACO1	NM_002197	NM_007386	65.7841	51.236	45.7526	74.1935	47.4532	43.4302	0	0	0	24	24	0	0.337065	NA	22.9531	24	0.0643435	0	0	0	0	0	0	0	0	0	0
ACO2	NM_001098	NM_080633	56.8627	54.4174	46.3612	40.9091	57.3197	49.2021	0	0	0	24	24	0	-0.589613	0.664723	24	24	0	0	0	0	0	0	0	0	0	0	0
ACOT13	NM_001160094,NM_018473	NM_025790	61.1374	46.3357	40.2299	60.262	44.6809	40.0637	0	0	0	10.9125	8.51875	-0.357268	-2.30548	NA	24	24	0	1	1	0	1	1	0	1	0	0	1
ACOT2	NM_006821,NR_046028	NM_134188	53.6585	62.1145	39.2182	53.2967	60.1928	31.0345	1	0	0	10.6969	4.08125	-1.39011	-0.324921	2.53992	5.30312	3.825	-0.471383	0	0	0	0	0	0	0	0	0	0
ACOT7	NM_007274,NM_181864,NM_181865,NM_181866	NM_133348	81.0811	58.4211	53.5714	60.6061	60	52	0	0	0	24	24	0	0.0809863	NA	24	24	0	0	0	0	0	0	0	0	0	0	0
ACOT8	NM_005469	NM_133240	53.8462	59.2939	50	58.5106	60.7292	52.1368	2	1	0	17.6625	24	0.442345	-0.260827	2.24212	24	5.30625	-2.17727	0	0	0	0	0	0	0	0	0	0
ACOT9	NM_001033583,NM_001037171	NM_019736	64.6226	42.8788	41.3636	70.5479	45.2116	41.0256	0	0	0	14.2094	6.30469	-1.17235	-0.77654	NA	17.0625	17.7	0.0529203	0	0	0	0	0	0	0	0	0	0
ACOX1	NM_001185039,NM_004035,NM_007292	NA	NA	NA	NA	68.144	49.5209	41.4885	7	2	0	8.8	8.45937	-0.0569524	0.751991	1.63281	7.38438	7.95312	0.107046	1	1	1	1	0	0	0	0	0	0
ACOX3	NM_001101667,NM_003501	NM_030721	54.3689	54.9691	49.3701	55.4348	56.3005	45.2135	0	0	0	6.70625	4.90781	-0.450426	1.66501	NA	4.51406	3.63008	-0.314426	0	0	0	0	0	0	0	0	0	0
ACP1	NM_001040649,NM_004300,NM_007099,NR_024080	NM_021330	66.25	44.4444	41.2941	78.125	45.4927	39.3661	0	0	0	11.2656	13.3719	0.247274	-1.26632	0.522576	24	24	0	0	0	0	0	0	0	0	0	0	0
ACP2	NM_001131064,NM_001610	NM_007387	50	52.7516	45.0566	60.6838	59.434	54.4226	1	0	0	11.225	16.0125	0.512483	0.907976	9.42975	9.92656	10.475	0.0775841	0	0	0	0	0	0	0	0	0	0
ACSF3	NM_001127214,NM_001243279,NM_174917,NR_023316,NR_045666,NR_045667	NM_144932	68.1818	57.6484	57.8488	70.8661	60.9474	60.9897	3	2	0	5.97656	4.75234	-0.330677	2.09802	NA	3.94219	2.86992	-0.457985	0	0	0	0	0	0	0	0	0	0
ACSL1	NM_001995	NM_001302163,NM_007981	68.4685	49.8095	45.1305	70.2247	48.784	39.3464	1	0	0	10.3406	8.99844	-0.200578	1.34772	NA	9.11094	16.5656	0.862522	0	0	0	0	0	0	0	0	0	0
ACSL3	NM_004457,NM_203372	NM_028817,NM_001033606	64.5181	42.4411	36.646	64.5349	40.4993	31.3681	0	0	0	8.20625	4.96719	-0.724294	-0.963809	0.433723	12.0594	15.3625	0.349257	0	0	0	0	0	0	0	0	0	0
ACSL4	NM_004458,NM_022977	NM_001033600,NM_019477	58.926	43.5171	33.6066	67.0886	41.8778	30.735	2	0	0	8.50625	4.21953	-1.01144	-0.347641	NA	11.1062	24	1.11166	0	0	0	0	0	0	0	0	0	0
ACSS2	NM_001076552,NM_001242393,NM_018677	NM_019811	66.6667	54.2735	43.0931	68.595	54.8908	50.3989	0	0	0	13.0281	17.65	0.438038	2.31863	NA	NA	9.33437	NA	0	0	0	0	0	0	0	0	0	0
ACTB	NM_001101	NM_007393	65.1376	56.5603	39.9707	76.1905	60.5496	42.1667	1	0	0	24	24	0	-0.0793361	0.902972	24	10.8781	-1.1416	0	0	0	0	0	0	0	0	0	0
ACTL6A	NM_004301,NM_177989,NM_178042	NM_019673	62.1777	49.3798	35.8491	64.7399	43.4884	29.1139	0	0	0	21.9438	6.375	-1.78331	-1.44021	NA	19.3656	16.8	-0.205037	0	0	0	0	0	0	0	0	0	0
ACTL8	NM_030812	NA	NA	NA	NA	57.8704	59.5822	49.8162	3	0	0	24	9.48125	-1.33989	0.662772	NA	18.3875	NA	NA	0	0	0	0	0	0	0	0	0	0
ACTN1	NM_001102,NM_001130004,NM_001130005	NM_134156	73.2143	54.5726	40.1282	72.2581	57.5215	40.4891	0	0	0	12.8812	7.61875	-0.757646	0.394769	1.13673	11.5312	13.7562	0.254538	0	0	0	0	0	0	0	0	0	0
ACTN4	NM_004924	NM_021895	72.6115	56.444	49.7452	78.1513	60.0877	52.6843	1	0	0	16.1187	10.7875	-0.579379	1.51833	2.23213	19.0813	24	0.330879	0	0	0	0	0	0	0	0	0	0
ACTR10	NM_018477	NM_019785	72.449	45.5343	39.5506	72.8155	42.4242	34.7786	0	0	0	13.5469	5.18125	-1.38659	-1.46331	0.150273	16.9812	24	0.499092	0	1	0	1	0	0	0	0	0	0
ACTR1A	NM_005736	NM_016860	63.7931	52.6083	54.4108	68.5185	52.4315	56.4259	3	1	0	5.59297	8.98438	0.683804	2.53435	19.6623	4.54375	3.81406	-0.252555	0	0	0	0	0	0	0	0	0	0
ACTR1B	NM_005735	NM_146107	75.4839	54.7303	53.5168	79.8077	57.8249	56.4744	0	0	0	9.6875	11.2984	0.221927	1.83987	2.80198	7.79375	9.04688	0.215102	0	0	0	0	0	0	0	0	0	0
ACTR2	NM_001005386,NM_005722	NM_146243	77.0492	45.0633	37.0231	67.4419	42.616	34.0603	1	0	1	24	10.2094	-1.23314	-0.72078	0.187932	24	24	0	0	0	0	0	0	0	0	0	0	0
ACTR3	NM_005721	NM_023735,NM_001205385,NM_001205386	73.816	44.9483	36.9532	67.5	42.0048	32.2467	0	0	1	17.8813	8.14375	-1.13468	-0.398156	0.344557	24	24	0	1	0	0	0	1	0	0	1	0	0
ACTR3B	NM_001040135,NM_020445,NR_073000,NR_073001	NM_001004365	77.9661	49.0851	52.1739	84.3284	49.4033	41.5254	0	0	3	7.38438	4.88594	-0.59584	1.16783	2.06675	4.91172	4.62422	-0.0870183	0	0	0	0	0	0	0	0	0	0
ACTR5	NM_024855	NM_175419	64.1732	60.7006	55.4517	80	55.4276	47.619	1	1	1	4.18672	2.8625	-0.548544	0.121208	NA	3.71016	3.42578	-0.115047	1	0	1	0	0	0	0	0	0	0
ACTR6	NM_022496,NR_048568,NR_048569	NM_025914	59.2593	40.3862	29.6943	52.4183	36.1041	31.0413	0	0	1	12.075	2.75156	-2.1337	-0.75295	NA	5.25781	8.26875	0.653206	0	0	0	0	0	0	0	0	0	0
ACTR8	NM_022899	NM_027493	69.7674	50.72	29.9145	71.2871	47.2	39.3462	0	0	0	4.26562	4.09609	-0.0585083	0.305236	NA	4.36016	3.97344	-0.133992	0	0	0	0	0	0	0	0	0	0
ACVR1B	NM_004302,NM_020327,NM_020328	NM_007395	80.7692	54.2161	52.3252	87.013	53.9526	51.4315	3	1	1	1.90644	2.43457	0.352782	2.11684	8.05441	1.44561	1.49297	0.0465108	0	0	0	0	0	0	0	1	0	0
ACY1	NM_000666,NM_001198895,NM_001198896,NM_001198897,NM_001198898	NM_025371,NM_001276442	67.3267	55.9902	51	73.4568	58.8427	51.9685	2	1	0	24	24	0	-0.0940972	NA	24	24	0	0	0	0	0	0	0	0	0	0	0
ACYP1	NM_001107,NM_203488	NM_025421	59.7015	50	25.7009	65.9091	44	26.9406	0	0	0	6.48281	2.19219	-1.56425	-2.62338	0.254546	24	24	0	0	0	0	0	0	0	0	0	0	0
ADAM10	NM_001110	NM_007399	73.5577	44.9333	36.0656	68.9189	41.611	33.7379	0	0	3	11.3531	6.4625	-0.812926	-0.863774	NA	12.825	24	0.904076	0	0	0	0	0	0	0	0	0	0
ADAM12	NM_003474,NM_021641	NM_007400	68.1818	55.4941	45.7306	65.1332	53.9927	40.4956	2	0	0	24	24	0	0.660706	NA	17.2937	24	0.472784	0	0	0	0	0	0	0	0	0	0
ADAM15	NM_001261464,NM_001261465,NM_001261466,NM_003815,NM_207191,NM_207194,NM_207195,NM_207196,NM_207197,NR_048577,NR_048578,NR_048579	NM_001037722	76.1468	59.8073	52.3985	80.8696	61.4315	63.5036	0	0	0	24	24	0	0.502029	9.71936	24	24	0	0	0	0	0	0	0	0	0	0	0
ADAM17	NM_003183	NM_001291871,NM_009615	63.5	46.9002	40.9323	66.1202	44.6061	36.5363	0	0	0	6.19688	3.7875	-0.710295	0.189632	3.00433	5.04609	5.29219	0.0686972	1	0	1	0	0	0	0	0	0	0
ADAM22	NM_004194,NM_016351,NM_021721,NM_021722,NM_021723	NM_001098225	75	49.0602	42.485	76.2791	44.7006	38.8235	0	0	0	6.525	7.78125	0.254024	-0.395465	NA	4.91719	NA	NA	0	0	0	0	0	0	0	0	0	0
ADAM9	NM_003816,NR_027638,NR_027639,NR_027878	NM_007404	67.7419	50.7918	34.6907	62.8205	44.5122	28.0128	0	0	1	24	24	0	-0.194467	1.03998	24	24	0	0	0	0	0	0	0	0	0	0	0
ADAMTS1	NM_006988	NM_009621	58.0645	54.4892	38.8183	62.1978	54.5455	36.9195	0	0	1	0.902136	24	4.73355	0.826317	15.4303	0.997501	1.00571	0.0118305	0	0	0	0	0	0	0	0	0	0
ADAP1	NM_006869	NM_172723	84.2308	57.6	59.8976	84.6591	61.7778	68.2664	3	2	0	5.44844	9.22969	0.760439	2.62678	4.24796	4.80781	NA	NA	0	0	0	0	0	0	0	0	0	0
ADAR	NM_001025107,NM_001111,NM_001193495,NM_015840,NM_015841	NM_019655	61.9048	53.9173	50.2165	54.4177	50.6438	46.6885	1	0	0	6.76094	4.41016	-0.616394	1.58649	3.98128	7.2125	6.47578	-0.155445	0	0	0	0	0	0	0	0	0	0
ADARB1	NM_001112,NM_001160230,NM_015833,NM_015834,NR_027672,NR_027673,NR_027674,NR_073200	NM_130895	61.4987	55.9829	50.7396	66.6667	55.2111	50.8933	2	2	0	5.30781	5.88906	0.149921	0.676742	NA	4.4125	5.65625	0.35825	0	0	0	0	0	0	0	0	0	0
ADARB2	NM_018702	NM_052977	55.2113	55.8534	40.4797	69.6319	67.4324	50.2551	9	0	3	2.09648	2.87344	0.454806	1.06535	NA	2.02012	2.01133	-0.00629048	0	1	0	1	0	0	0	1	0	1
ADAT1	NM_012091,NR_036460	NM_013925	61.4907	53.0667	47.53	53.8462	51.1597	44.1885	1	0	0	3.91406	2.56133	-0.611775	0.659727	0.480707	4.06953	3.31953	-0.293883	1	0	1	0	0	0	0	1	1	1
ADCK1	NM_001142545,NM_020421	NM_028105	63.9344	55.3866	48.8593	71.7172	56.4249	52.7531	0	0	0	9.23125	6.51953	-0.501758	1.21205	NA	9.56563	4.61875	-1.05036	0	0	0	0	0	0	0	0	0	0
ADCK2	NM_052853	NM_178873	68.2243	53.7217	44.0476	79.7753	59.6491	50.8197	0	0	0	4.61016	5.20625	0.175429	0.686829	2.97097	3.55586	3.24258	-0.133057	0	0	0	0	0	0	0	0	0	0
ADCK3	NM_020247	NM_023341,NM_001163290	58.5501	56.1404	48.0062	74.4186	60.2881	51.6089	0	0	0	6.24297	4.66563	-0.420162	2.03699	15.6445	3.60352	3.47812	-0.0510955	0	0	0	0	0	0	0	0	0	0
ADCK4	NM_001142555,NM_024876	NM_133770	61.039	59.4881	58.5882	68.4211	63.3598	60.6719	1	1	0	6.55312	7.1625	0.12828	2.57611	3.46349	3.58125	4.22813	0.239555	0	0	0	0	0	0	0	0	0	0
ADCY3	NM_004036	NM_001159537,NM_001159536	68.2883	56.1281	48.645	62.3116	58.1659	48.9501	0	0	0	7.79063	6.43281	-0.276289	1.87419	6.47708	6.09844	5.68125	-0.102231	0	0	0	0	0	0	0	0	0	0
ADCY6	NM_015270,NM_020983	NM_007405	50.6494	57.1429	53.6078	88.2353	59.3489	53.7819	2	0	0	4.57891	6.07266	0.407325	2.1956	8.5106	2.86719	3.56641	0.314834	0	0	0	0	0	0	0	0	0	0
ADCY7	NM_001114	NM_001037724,NM_007406,NM_001037723,NM_001109756	58.6213	56.6364	44.6828	66.4179	60.9312	44.233	1	0	1	5.48125	5.56875	0.0228486	1.32212	NA	3.67305	4.36016	0.247402	0	0	0	0	0	0	0	0	0	0
ADCY9	NM_001116	NM_009624	61.9048	54.1113	54.6742	80.1484	57.8533	52.0154	5	1	1	4.33437	3.68906	-0.23257	1.58518	1.43846	3.44062	3.82187	0.15161	0	0	0	0	0	0	0	0	0	0
ADD1	NM_001119,NM_014189,NM_014190,NM_176801	NM_001024458	62.2951	52.7627	51.3405	74.4681	52.7552	53.8015	1	1	0	8.38281	6.7125	-0.320584	2.44973	3.49151	8.54688	7.65313	-0.159348	0	0	0	0	0	0	0	0	0	0
ADD3	NM_001121,NM_016824,NM_019903	NM_013758,NM_001164099,NM_001277100	53.225	51.1551	38.312	64.6277	43.4229	30.9194	1	0	1	13.175	6.46172	-1.02781	-0.882064	0.678871	22.425	24	0.0979264	0	0	0	0	0	0	0	0	0	0
ADH5	NM_000671	NM_001288578,NM_007410	67.4157	50.2222	37.4359	75	45.7778	36.1613	0	0	0	15.7875	6.03594	-1.38713	0.805357	NA	18.1875	12.4422	-0.547707	0	0	0	0	0	0	0	1	0	0
ADI1	NM_018269	NM_134052	77.2727	52.4074	43.211	69.5652	55.7407	38.6973	1	0	0	24	17.8313	-0.428627	0.19502	12.71	24	24	0	0	0	0	0	0	0	0	0	0	0
ADIPOR1	NM_015999,NR_046083	NM_028320	71.5232	55.2305	45.6586	71.5686	52.4823	40.8907	0	0	0	12.7438	8.29688	-0.61915	-0.577177	0.500835	11.3344	21.3125	0.910994	0	0	0	0	0	0	0	0	0	0
ADIPOR2	NM_024551	NM_197985	50.6702	49.2679	48.9057	62.9442	47.7175	45.3778	1	1	1	4.91641	4.02695	-0.287915	1.03936	6.53036	4.63125	4.81016	0.054682	0	0	0	0	0	0	0	0	0	0
ADK	NM_001123,NM_001202449,NM_001202450,NM_006721	NM_134079,NM_001243041	70.7692	47.8821	34.7619	62.766	42.7916	28.5548	1	0	0	24	10.7937	-1.15284	-1.8032	NA	24	24	0	0	0	0	0	0	0	0	0	0	0
ADM5	NM_001101340	NA	NA	NA	NA	63.66	65.5844	56.338	1	1	0	1.56211	20.2375	3.69546	1.2458	NA	0.531348	NA	NA	0	0	0	0	0	0	0	0	0	0
ADNP	NM_015339,NM_181442	NM_009628	78.4926	45.5966	40.4336	66.087	43.7897	37.5826	1	0	0	1.3625	1.98359	0.541861	0.301435	0.640644	2.96016	2.2957	-0.366737	0	0	0	0	0	0	0	0	0	0
ADNP2	NM_014913	NM_175028	76.1538	52.4014	41.185	69.2308	50.3828	36.1328	0	0	0	1.05724	1.41494	0.42044	0.211546	NA	1.90859	1.65918	-0.20204	0	0	0	0	0	0	0	0	0	0
ADO	NM_032804	NM_001005419	80.2198	68.2231	42.1942	77.3026	69.0037	38.2815	0	0	0	1.0868	2.21758	1.02889	1.20757	NA	1.82129	2.79375	0.617243	0	0	0	0	0	0	0	0	0	0
ADORA2B	NM_000676	NM_007413	72.0339	56.1562	38.8736	78.6145	55.3554	40.2527	0	0	0	2.22109	3.01094	0.438943	-0.0390941	NA	2.94219	2.04785	-0.522778	1	0	1	0	0	0	0	0	0	0
ADPGK	NM_031284,NR_023318,NR_023319	NM_028121	67.7419	56.0027	43.6205	71.2766	54.9296	41.6838	1	0	0	4.95625	3.92266	-0.337418	0.682342	NA	4.29297	4.59687	0.0986777	0	0	0	0	0	0	0	0	0	0
ADPRHL2	NM_017825	NM_133883	72.7273	61.2758	57.4144	66.0377	60.5311	54.7619	1	0	0	2.30176	2.66172	0.209622	2.30763	4.00137	1.71309	1.77168	0.0485205	0	0	0	0	0	0	0	0	0	0
ADRBK1	NM_001619	NM_130863	63.3094	54.5267	57.4158	87.594	60.3865	63.0866	0	0	0	6.31562	4.99219	-0.339253	1.68478	5.96362	3.54531	3.82617	0.109989	0	0	0	0	0	0	0	0	0	0
ADRM1	NM_007002,NM_175573	NM_019822	76.5854	58.9052	45.283	77.5	63.5621	54.4554	0	0	0	5.44375	8.27812	0.604703	-0.786782	19.9266	5.16563	6.18906	0.260778	0	0	0	0	0	0	0	0	0	0
ADSL	NM_000026,NM_001123378	NM_009634	63.7931	54.8454	44.3383	67.7966	50.1718	32.6531	0	0	0	24	13.3094	-0.850591	-1.34295	0.866129	24	14.8031	-0.697132	0	0	0	0	0	0	0	0	0	0
ADSS	NM_001126	NM_007422	67.5214	44.9307	37.3344	76.0252	42.5966	31.4442	0	0	0	4.88359	2.66602	-0.873258	-1.26781	NA	5.78203	6.09531	0.076124	0	0	0	0	0	0	0	0	0	0
ADSSL1	NM_152328,NM_199165	NM_007421	63.8889	58.2242	44.7674	74.3243	58.952	42.9967	0	0	0	14.725	14.3688	-0.0353331	-0.044502	NA	9.875	24	1.28118	0	0	0	0	0	0	0	0	0	0
AEBP2	NM_001114176,NM_001267043,NM_153207	NM_001005605	81.1224	61.0329	37.549	76.9231	56.6799	30.2523	0	0	2	2.26465	2.69375	0.250329	-0.291443	NA	3.57422	6.76562	0.920595	0	0	0	0	0	0	0	0	0	0
AEN	NM_022767	NM_026531	63.1579	60.0396	47.1578	65.5629	62.2699	52.0886	2	1	0	1.13616	2.78945	1.29582	2.42664	17.9778	1.11201	0.85271	-0.383045	1	0	0	0	1	0	0	0	0	0
AES	NM_001130,NM_198969,NM_198970	NM_001276288,NM_010347	85.1351	58.5859	55.6054	86.1272	58.9226	54.8955	0	0	1	24	21.7	-0.145339	0.704189	0.643826	24	24	0	0	0	0	0	0	0	0	0	0	0
AFAP1	NM_001134647,NM_198595	NM_027373	71.4286	55.7377	47.8561	79.1209	55.2212	49.4656	0	0	2	3.53047	3.46328	-0.0277204	1.25427	7.71138	2.69414	2.55	-0.0793281	0	0	0	0	0	0	0	0	0	0
AFAP1L1	NM_001146337,NM_152406	NM_178928	74.7748	57.9974	45.809	83.2061	58.7776	43.3484	0	0	0	8.55625	10.6609	0.317284	1.48517	NA	8.425	6.60781	-0.350504	1	1	1	0	1	1	0	0	0	0
AFF1	NM_001166693,NM_005935	NM_133919	71.8563	56.5217	45.1656	70.1818	52.3106	38.3523	1	0	3	2.83477	1.77539	-0.675093	-0.576984	4.20385	3.21836	4.11875	0.355881	0	0	0	0	0	0	0	0	0	0
AFF4	NM_014423	NM_033565	78.4053	48.8372	40.5226	73.5294	46.2486	35.7218	0	0	0	4.77109	3.23516	-0.560485	0.239732	0.958064	5.39687	5.3125	-0.0227333	0	0	0	0	0	0	0	0	0	0
AFG3L2	NM_006796	NM_027130	73.9394	51.7227	48.728	79.8969	47.8279	47.182	0	0	1	9.0625	5.10234	-0.828749	1.18677	5.06585	6.7875	5.69844	-0.252314	0	0	0	0	0	0	0	0	0	0
AFMID	NM_001010982,NM_001145526,NR_027083	NM_027827	69.2308	55.8824	51.1208	64.8148	56.4693	48.822	0	0	0	6.59922	6.44375	-0.0343948	1.15244	1.93992	6.4	4.75	-0.430144	0	1	0	1	0	0	0	0	0	0
AFTPH	NM_001002243,NM_017657,NM_203437	NM_181411	70.5696	44.825	36.091	67.0588	41.2821	31.1662	0	0	2	2.54219	2.23633	-0.184939	-0.781765	NA	3.83984	5.53203	0.526762	0	0	0	0	0	0	0	0	0	0
AGAP1	NM_001037131,NM_001244888,NM_014914	NM_178119	71.7949	57.77	50.3153	83.4448	58.1974	50.3647	6	1	4	7.74844	5.97031	-0.376099	1.0881	0.372986	7.01094	NA	NA	1	0	0	0	1	0	0	1	0	0
AGAP3	NM_001042535,NM_031946	NM_139153	86.6667	61.727	56.5315	100	64.2544	54.3611	0	0	1	4.8625	7.18125	0.562537	1.42211	13.8694	3.51367	2.90078	-0.276538	0	0	0	0	0	0	0	0	0	0
AGBL5	NM_001035507,NM_021831	NM_001048192	74.5902	55.5687	50.3949	71.4286	54.364	40.9091	0	0	0	24	24	0	-0.911812	1.35484	24	24	0	0	0	0	0	0	0	0	0	0	0
AGFG1	NM_001135187,NM_001135188,NM_001135189,NM_004504	NM_010472	81.25	49.7619	38.2266	83.2	47.4837	33.1946	2	1	2	7.40625	4.17734	-0.826157	-0.942806	NA	7.25	6.7375	-0.105768	1	0	1	0	0	0	0	0	0	0
AGFG2	NM_006076	NM_178162	69.3878	60.5556	48.9891	70.5882	62.379	56.581	3	2	0	3.41055	3.17734	-0.102182	2.18997	NA	1.92676	1.95859	0.023643	0	0	0	0	0	0	0	0	0	0
AGGF1	NM_018046	NA	NA	NA	NA	66.7539	41.8182	33.3165	0	0	2	3.51719	3.37031	-0.0615399	-1.53279	1.86667	5.125	4.7375	-0.113426	1	0	0	0	1	0	0	0	0	0
AGK	NM_018238	NM_023538	64.4068	49.2101	45.7778	70.7602	48.1481	39.1246	1	1	1	6.75625	7.77344	0.20233	0.824904	NA	6.67344	6.025	-0.147469	0	0	0	0	0	0	0	0	0	0
AGMAT	NM_024758	NM_001081408	60.8696	60.1671	45.3125	72.028	60.6232	44.7234	1	0	0	17.8813	6.96875	-1.35948	1.65656	NA	10.6422	9.57812	-0.15198	1	1	1	1	0	0	0	0	0	0
AGO1	NM_012199	NM_153403	74.6914	54.3512	47.7177	74.6479	54.7009	46.7278	4	2	0	16.3156	24	0.55678	0.977439	2.2	9.05312	13.1813	0.541999	0	0	0	0	0	0	0	0	0	0
AGO2	NM_001164623,NM_012154	NM_153178	86.2069	54.2005	47.162	90.2439	56.7054	41.6382	0	0	0	5.90234	6.0875	0.0445619	-0.244133	1.05498	3.93594	4.04453	0.0392649	0	0	0	0	0	0	0	0	0	0
AGO3	NM_024852,NM_177422	NM_153402	68.1481	46.6512	40.2919	73.913	45.5285	34.0307	0	0	0	5.60625	6.12344	0.127306	-0.453529	1.83	6.2875	6.6125	0.0727093	0	0	0	0	0	0	0	0	0	0
AGPAT1	NM_006411,NM_032741	NM_018862,NM_001163379	61.9271	59.2075	55.4622	0	0	0	0	0	0	24	10.4469	-1.19996	-0.0942741	1.64906	9.87813	9.89531	0.00250812	0	0	0	0	0	0	0	0	0	0
AGPAT2	NM_001012727,NM_006412	NM_026212	79.5082	55.675	56.7925	82.3529	63.7993	66.5025	3	1	0	9.27187	8.325	-0.155411	1.53401	2.43575	7.73125	6.19688	-0.319161	0	0	0	0	0	0	0	0	0	0
AGPAT3	NM_001037553,NM_020132	NM_053014	65.2174	56.9408	53.9548	77.027	57.2944	52.0185	9	5	1	5.82969	5.15859	-0.176441	1.51598	2.5339	4.36953	4.10625	-0.089657	0	0	0	0	0	0	0	1	0	0
AGPAT5	NM_018361	NM_026792	79.1519	45.9927	41.5088	78.8462	45.0228	34.6304	0	0	1	5.39531	3.32656	-0.697674	-0.0358445	NA	5.06641	5.81719	0.199359	1	0	1	0	0	0	0	0	0	0
AGPAT6	NM_178819	NM_018743	55.8428	49.5988	52.3039	51.7572	50.1823	53.45	4	2	0	5.20937	5.30156	0.0253075	1.74951	21.8541	3.72812	4.24219	0.186358	1	1	0	1	1	0	0	0	0	0
AGPAT9	NM_001256421,NM_001256422,NM_032717	NM_172715	66.8919	50.3417	38.1589	65.0327	46.5134	36.224	0	0	0	5.09922	2.48789	-1.03535	0.0900685	0.0612321	4.32422	2.32969	-0.892303	0	0	0	0	0	0	0	0	0	0
AGPS	NM_003659	NM_172666	75	47.6687	38.9486	72.3404	44.3601	33.5756	1	0	1	15.6375	6.36875	-1.29593	-0.89788	0.489793	19.525	24	0.297712	0	0	0	0	0	0	0	0	0	0
AGRN	NM_198576	NM_021604	82.3529	59.4758	50.9749	88	68.5239	61.6872	1	0	0	5.13906	5.65	0.136746	2.0802	10.2477	3.16367	4.76719	0.591538	0	0	0	0	0	0	0	0	0	0
AGTRAP	NM_001040194,NM_001040195,NM_001040196,NM_001040197,NM_020350	NM_001301281,NM_009642	75	57.4074	51.7826	76.6129	60.2083	61.8307	2	0	0	24	24	0	1.84269	3.5208	17.5031	18.6281	0.0898699	0	0	0	0	0	0	0	0	0	0
AGXT2L2	NM_153373	NM_028398	73.4375	53.2764	43.932	73.8095	57.5758	46.3235	0	0	0	3.25156	11.1125	1.77298	0.110786	1.77778	1.93301	1.53672	-0.330994	0	0	0	0	0	0	0	0	0	0
AHCTF1	NM_015446	NM_026375	74.3284	44.7861	38.1515	74.2268	40.8612	31.0082	0	0	1	4.14844	2.59453	-0.677094	-1.07606	NA	3.10938	4.26016	0.454282	0	0	0	0	0	0	0	0	0	0
AHCY	NM_000687,NM_001161766	NM_016661	61.9048	55.2733	47.0588	61.8705	58.5065	48.6346	3	0	0	24	24	0	1.74641	1.67029	24	24	0	0	0	0	0	0	0	0	0	0	0
AHCYL1	NM_001242673,NM_001242674,NM_001242675,NM_001242676,NM_006621	NM_145542	78.7986	50.2825	39.6074	74.3056	50.7219	39.9127	0	0	0	24	17.9281	-0.420809	0.681035	2.06315	23.6625	23.9812	0.0193044	0	0	0	0	0	0	0	0	0	0
AHCYL2	NM_001130720,NM_001130722,NM_001130723,NM_015328	NM_001171001	45.9302	48.5265	44.0761	71.4286	53.0278	41.7877	0	0	0	21.825	11.2188	-0.96007	0.904296	4.18382	12.4734	12.1125	-0.0423627	0	1	0	1	0	0	0	0	0	0
AHI1	NM_001134830,NM_001134831,NM_001134832,NM_017651	NM_026203	59.3407	46.9784	42.3249	65.4008	39.2648	35.2062	1	1	0	8.4375	6.075	-0.473931	-1.31796	2.66384	7.58281	11.4766	0.597885	1	0	1	0	0	0	0	0	0	0
AHNAK	NM_001620,NM_024060	NA	NA	NA	NA	71.6667	49.3069	42.6366	2	0	1	7.29063	6.80469	-0.0995135	0.459813	NA	5.28281	5.8875	0.156349	0	0	0	0	0	0	0	0	0	0
AHR	NM_001621	NM_013464	77.3494	51.4061	36.7956	74.7145	42.0495	32.9122	1	0	1	0.44751	0.437988	-0.0310269	0.563645	NA	2.84063	2.94062	0.0499144	1	1	1	1	0	0	0	0	0	0
AHRR	NM_001242412,NM_020731	NM_009644	68.8073	52.6116	44.1906	50	63.8783	53.3854	4	1	0	0.651245	6.45781	3.30977	1.79652	3.28471	1.78076	1.61397	-0.141885	1	0	1	0	0	0	0	0	0	0
AHSA1	NM_012111	NM_146036	66.6667	51.6224	48.2906	66.25	49.4592	51.5695	0	0	1	8.075	5.78906	-0.480132	-1.30359	2.8	9.04219	11.3016	0.321778	0	0	0	0	0	0	0	0	0	0
AHSA2	NM_152392	NM_172391	76.1364	47.1888	40.9508	58.4233	42.7536	35.6863	1	0	0	0.467432	7.03281	3.91127	-3.40337	NA	1.13599	1.68477	0.568603	0	0	0	0	0	0	0	0	0	0
AIDA	NM_022831	NM_181732	68.2979	43.0283	40.7817	72.6829	40.9338	37.2872	2	0	0	14.4844	12.2375	-0.243189	-0.113184	NA	21.15	24	0.182377	0	0	0	0	0	0	0	0	0	0
AIF1L	NM_001185095,NM_001185096,NM_031426,NR_033701	NM_145144	72.1698	53.4216	49.7145	79.2208	52.3179	51.9081	5	2	0	9.82344	21.6375	1.13923	1.87198	2.92772	11.7703	6.725	-0.807546	0	1	0	0	0	1	0	1	0	0
AIFM1	NM_001130846,NM_001130847,NM_004208,NM_145812,NM_145813	NM_012019	64	48.7221	36.4162	65.368	49.4571	37.6289	1	0	0	24	17.7	-0.439285	-0.492842	3.59955	24	24	0	0	0	0	0	0	0	0	0	0	0
AIFM2	NM_001198696,NM_032797	NM_178058,NM_001039194	61.1578	57.041	52.6077	74.2991	58.8235	52.4333	1	1	0	4.27813	5.19453	0.280015	0.99175	NA	2.99453	2.82734	-0.0828826	0	1	0	1	0	0	0	0	0	0
AIG1	NM_016108	NM_025446	82.4121	50.6971	43.9024	75	48.1172	38.535	1	0	0	24	24	0	-0.455742	0.142993	24	24	0	0	0	0	0	0	0	0	0	0	0
AIMP1	NM_001142415,NM_001142416,NM_004757	NM_007926	67.0588	48.2292	29.8701	56.0976	42.4332	31.7232	0	0	0	7.26094	3.96016	-0.874599	-1.61397	0.632846	11.1656	12.7781	0.194612	0	0	0	0	0	0	0	0	0	1
AIMP2	NM_006303	NM_001172146	61.2903	53.9979	43.8776	63.7168	52.8557	33.5664	0	0	0	6.97969	6.16406	-0.179281	-2.02662	NA	9.08594	4.875	-0.898233	0	0	0	0	0	0	0	0	0	0
AIP	NM_003977	NM_016666	62.5	56.3948	55.8621	61.6	60.8258	56.5217	0	0	1	11.3187	8.19688	-0.465569	-1.37318	NA	8.775	6.36406	-0.463451	0	0	0	0	0	0	0	0	0	0
AJUBA	NM_032876,NM_198086	NM_010590	71.5365	62.5912	50.0684	71.3137	63.8837	41.8822	2	0	0	2.39766	3.13203	0.385474	2.16656	NA	1.99297	2.16016	0.116216	0	1	0	1	0	0	0	0	0	0
AK1	NM_000476	NM_001198790,NM_001198792,NM_001198791	58.1387	54.359	54.3904	73.8562	57.265	56.8717	1	1	0	15.6438	10.9781	-0.510954	-0.100316	3.49693	24	24	0	1	0	1	0	0	0	0	0	0	0
AK2	NM_001199199,NM_001625,NM_013411,NR_037591,NR_037592	NM_016895	60.8333	55.0787	49.6881	65.0602	53.3619	44.2021	0	0	0	17	15.6844	-0.116206	0.523922	2.10355	24	20.4219	-0.232919	1	1	0	0	1	1	0	0	0	0
AK3	NM_001199852,NM_001199853,NM_001199855,NM_001199856,NM_016282	NM_021299	75	53.2164	43.9538	76.5766	51.1696	36.8236	1	0	1	17.3906	5.30703	-1.71233	-0.0809981	NA	13.7125	24	0.807543	1	1	1	1	0	0	0	0	0	0
AK4	NM_001005353,NM_013410,NM_203464	NM_001177605,NM_009647,NM_001177602,NM_001177604	73.9281	51.6369	46.4844	69.2946	50.1488	39.8291	5	0	0	7.44844	3.25234	-1.19546	0.541953	NA	7.52656	6.375	-0.239566	1	1	1	0	1	1	0	0	0	0
AKAP1	NM_001242902,NM_001242903,NM_003488	NM_009648,NM_001042541	65.4129	55.3225	45.5867	72.2944	56.1947	39.6098	1	0	2	4.54375	2.50742	-0.857679	0.117028	1.82251	3.51016	3.91484	0.15742	0	0	0	0	0	0	0	0	0	0
AKAP10	NM_007202	NM_019921	68.75	46.355	43.1831	68.3616	44.7964	38.5352	1	0	0	0.474658	0.38645	-0.296606	0.636045	5.27907	2.12031	2.18125	0.0408779	0	0	0	0	0	0	0	0	0	0
AKAP11	NM_016248	NM_001164503	70.1493	42.5858	39.83	46.8571	40.028	33.0775	0	0	1	4.625	3.43516	-0.429078	-1.34999	NA	5.20391	7.09844	0.447907	0	0	0	0	0	0	0	0	0	0
AKAP12	NM_005100,NM_144497	NM_031185	62.1053	54.0059	40.9409	65.7576	50.2275	35.1494	2	0	2	10.1	8.90781	-0.181212	-1.69201	3.89513	11.3938	24	1.07479	0	1	0	1	0	0	0	0	0	0
AKAP13	NM_001270546,NM_006738,NM_007200	NM_029332	73.4513	50.09	50.4516	42.9577	48.6411	48.8784	8	1	0	4.61875	3.40859	-0.438326	0.819175	5.72326	3.70391	3.4457	-0.104249	0	0	0	0	0	0	0	0	0	0
AKAP2	NM_001004065,NM_001136562,NM_001198656	NM_001035532	55.2941	55.3916	43.4404	54.5894	54.4574	39.3124	0	0	1	3.09531	2.62539	-0.237553	0.620567	NA	2.45469	2.19492	-0.16137	0	1	0	0	0	1	0	0	0	0
AKAP8	NM_005858	NM_019774	58	52.8101	39.5952	65.7143	58.6821	41.8938	0	0	0	3.30039	3.49063	0.0808484	1.33973	4.56001	2.62969	2.32812	-0.175723	1	0	1	0	0	0	0	0	0	0
AKAP8L	NM_014371	NM_017476	64.6341	54.5691	61.194	62.6263	59.2478	63.5135	0	0	0	6.33984	6.72813	0.0857572	-0.715966	6.28891	4.95156	4.92188	-0.00867598	0	0	0	0	0	0	0	0	0	0
AKIP1	NM_001206646,NM_001206647,NM_001206648,NM_020642,NR_045417,NR_045418	NM_020616	69.8925	54.7731	39.8649	67.1053	54.3444	47.0785	0	0	0	6.36406	6.36562	0.000354053	1.29013	NA	7.8375	3.86797	-1.01882	0	1	0	1	0	0	0	0	0	0
AKIRIN1	NM_001136275,NM_024595	NM_023423	71.2707	55.9028	42.0044	75.9124	55.2677	39.9502	1	0	0	1.9	3.32969	0.809388	1.01924	2.48819	2.78008	3.36875	0.277088	1	0	1	0	0	0	0	0	0	0
AKIRIN2	NM_018064	NM_001007589	82.4074	51.8152	37.7745	68.7822	51.3072	36.4993	0	0	1	1.84102	3.05352	0.729969	-0.159236	0.85	2.38906	1.73848	-0.458621	0	0	0	0	0	0	0	0	0	0
AKR1A1	NM_001202413,NM_001202414,NM_006066,NM_153326	NM_021473	62.3563	51.8405	43.617	66.2069	54.3967	51.5789	0	0	0	24	24	0	0.782461	NA	24	24	0	0	0	0	0	0	0	0	0	0	0
AKR1B1	NM_001628	NM_009658	58.6957	53.5226	47.9339	70.2703	54.6793	46.6488	0	0	0	24	24	0	-0.396869	0.18421	24	24	0	0	0	0	0	0	0	0	0	0	0
AKR1C3	NM_001253908,NM_001253909,NM_003739	NA	NA	NA	NA	44.9275	46.5021	45.3552	0	0	0	24	6.46172	-1.89304	-2.44836	NA	24	24	0	0	0	0	0	0	0	0	0	0	0
AKR7A2	NM_003689	NM_025337	72.7273	63.3152	56.6474	77.2727	63.8889	48.5168	2	1	0	24	24	0	-0.773176	NA	24	24	0	1	1	1	1	0	0	0	0	0	0
AKT1	NM_001014431,NM_001014432,NM_005163	NM_001165894,NM_009652	80	57.1726	55.4162	84.0708	59.6674	55.0959	2	1	0	12.4094	18.4969	0.575851	1.26732	5.16206	8.725	9.43281	0.112533	0	0	0	0	0	0	0	0	0	0
AKT1S1	NM_001098632,NM_001098633,NM_032375	NM_026270,NM_001253920	61.9792	66.7959	58.51	55.6962	68.2231	61.1174	1	1	0	24	7.30078	-1.71691	1.43755	3.045	10.85	7.0375	-0.62456	0	0	0	0	0	0	0	0	0	0
AKT2	NM_001243027,NM_001243028,NM_001626	NM_007434,NM_001110208	62.1418	54.4952	54.6128	74.2475	58.4371	56.8214	5	2	1	7.98438	6.9	-0.210583	2.13164	4.97793	5.95469	6.26562	0.0734325	1	0	1	0	0	0	0	0	0	0
ALAD	NM_000031	NM_008525	68.4211	57.8046	47.5	70.297	59.4159	47.334	4	1	0	5.29219	6.47344	0.290668	0.802403	7.95386	2.87617	5.06406	0.816145	0	1	0	0	0	1	0	1	0	0
ALAS1	NM_000688,NM_199166	NM_020559	65.2893	54.1731	46.8048	62.9268	51.7941	30.6122	1	0	0	4.9625	4.11719	-0.269408	0.256314	3.57701	4.32031	6.4	0.566936	0	0	0	0	0	0	0	0	0	0
ALCAM	NM_001243280,NM_001243281,NM_001243283,NM_001627	NM_009655	57.7999	45.0913	34.8785	64.2241	42.2374	32.9407	0	0	1	24	18.35	-0.387254	-0.531054	0.307244	24	24	0	0	0	0	0	0	0	0	0	0	0
ALDH16A1	NM_001145396,NM_153329	NM_145954	63.0435	61.3533	47.8764	62.931	68.0365	52.3236	1	0	0	15.6156	10.3625	-0.591619	1.51472	4.4165	24	8.01562	-1.58215	0	1	0	1	0	0	0	0	0	0
ALDH18A1	NM_001017423,NM_002860	NM_153554	56.4935	55.0798	48.9338	64.4628	51.0888	41.7767	0	0	0	13.0828	8.79219	-0.573378	1.34334	1.4876	11.3781	7.64062	-0.574501	0	0	0	0	0	0	0	0	0	0
ALDH1B1	NM_000692	NM_028270	63.0573	57.2436	48.8812	71.2418	58.4299	42.6999	0	0	0	3.63125	3.02031	-0.265768	1.10994	NA	2.525	2.48945	-0.0204546	0	1	0	1	0	0	1	0	0	0
ALDH1L2	NM_001034173,NR_027752	NM_153543	65.873	51.5512	43.5922	79.5276	45.8514	38.75	1	0	1	24	20.0938	-0.256288	-0.521718	1.10687	13.1687	24	0.865916	1	1	0	1	1	1	1	1	0	0
ALDH2	NM_000690,NM_001204889	NM_009656	62.6822	59.2308	49.8473	73.9583	58.7516	36.5854	0	0	0	24	24	0	-0.142137	NA	24	24	0	0	0	0	0	0	0	0	0	0	0
ALDH3A2	NM_000382,NM_001031806	NM_007437	63.1285	49.2096	45.8476	71.4932	45.0617	42.1651	2	0	0	8.43281	5.98281	-0.49519	0.469254	NA	8.69375	11.9781	0.462352	1	0	1	0	0	0	0	0	0	0
ALDH3B1	NM_000694,NM_001030010,NM_001161473	NM_026316	67.1642	57.5693	52.8678	62.1622	64.2968	56.6193	1	0	0	9.75	13.2	0.437064	2.05921	NA	8.21562	7.7875	-0.0772101	1	0	1	0	1	0	0	0	1	0
ALDH4A1	NM_001161504,NM_003748,NM_170726	NM_175438	56.7766	58.9106	53.9437	53.1646	60.582	59.5053	2	1	0	19.3125	24	0.313499	2.70794	NA	12.7875	13.1687	0.0423842	0	0	0	0	0	0	0	0	0	0
ALDH6A1	NM_005589	NM_134042	72.7273	49.2537	36.4323	68.6869	48.5075	39.3235	0	0	0	24	24	0	-0.0404498	NA	24	24	0	1	0	1	0	0	0	0	0	0	0
ALDH7A1	NM_001182,NM_001202404	NM_138600	69.4118	53.5802	45.4545	68.75	49.2593	42.6056	1	0	0	24	24	0	-1.09344	NA	24	24	0	1	1	1	1	0	0	1	0	0	0
ALDH9A1	NM_000696	NM_019993	64.898	53.8857	43.3688	76.1905	49.3899	37.9475	0	0	1	17.6906	6.33984	-1.48047	0.677574	1.23333	17.5813	9.37969	-0.906426	0	0	0	0	0	0	0	0	0	0
ALDOA	NM_000034,NM_001127617,NM_001243177,NM_184041,NM_184043	NM_007438,NM_001177308	57.3892	56.5297	53.1169	67.7536	59.3607	61.5385	0	0	0	24	24	0	-1.23924	1.26498	24	24	0	0	0	0	0	0	0	0	0	0	0
ALDOC	NM_005165	NM_009657	51.9802	55.9524	49.5074	62.069	55.9817	52.3114	2	0	0	24	24	0	0.859352	NA	24	24	0	0	0	0	0	0	0	0	0	0	0
ALG1	NM_019109	NM_145362	79.3103	57.833	49.0975	70.7317	57.6344	48.9191	1	0	0	11.9875	7.56875	-0.663404	1.17401	0.884964	6.31094	6.46328	0.0344123	1	1	1	1	0	0	0	0	0	0
ALG12	NM_024105	NM_001142357	61.9048	54.2779	48.2051	64.5985	59.9864	57.2785	0	0	0	7.80469	7.65625	-0.027703	2.42555	2.56214	5.81875	5.59141	-0.0574982	0	0	0	0	0	0	0	0	0	0
ALG13	NM_001039210,NM_001099922,NM_001168385,NM_001257230,NM_001257231,NM_001257234,NM_001257235,NM_001257237,NM_001257239,NM_001257240,NM_001257241,NM_018466,NR_033125	NM_026247	64.1921	44.5783	33.1771	53.4979	44.7818	31.1728	0	0	0	13.3844	5.63281	-1.24862	-1.23778	4.20861	16.5063	24	0.540022	0	1	0	0	0	1	0	0	0	0
ALG14	NM_144988	NM_024178	58.0645	51.682	28	60.3774	47.7727	32.0113	1	0	0	16.3531	5.71172	-1.51757	-1.18306	0.258479	14.8969	24	0.688024	0	0	0	0	0	0	0	0	0	0
ALG2	NM_033087,NR_024532	NM_019998	65.9574	55.0481	42.6999	70	54.0368	34.3936	0	0	0	1.11335	0.520215	-1.09773	-0.724079	NA	3.08906	3.22578	0.0624792	1	0	0	0	1	0	1	0	0	0
ALG3	NM_001006941,NM_005787,NR_024533,NR_024534	NM_145939	50	54.8216	48.0769	67.7419	59.2255	54.5946	1	1	0	24	24	0	-0.783689	0.223848	24	19.8625	-0.272987	0	0	0	0	0	0	0	0	0	0
ALG5	NM_001142364,NM_013338	NM_025442	80	49.5385	36.8071	74.6269	43.1795	26.3158	0	0	0	24	8.94063	-1.42459	-1.5496	NA	24	24	0	0	0	0	0	0	0	0	0	0	0
ALG8	NM_001007027,NM_024079	NM_199035	65.625	47.6913	41.1168	63.0769	42.3782	31.8182	0	0	0	24	22.8938	-0.0680806	-2.7438	0.108702	24	24	0	0	0	0	0	0	0	0	0	0	0
ALG9	NM_001077690,NM_001077691,NM_001077692,NM_024740	NM_133981	50.5464	51.9063	49.1803	56.5657	46.5686	41.1233	2	0	0	24	11.2078	-1.09853	-1.12161	NA	14.2156	NA	NA	0	1	0	1	0	1	0	0	0	0
ALKBH1	NM_006020	NM_001102565	66.6667	53.2479	42.1407	88.8889	52.4786	38.4068	0	0	0	1.39922	4.66406	1.73697	0.941601	NA	2.64023	1.70859	-0.627856	1	0	0	0	1	0	0	0	0	0
ALKBH2	NM_001001655,NM_001145374,NM_001145375,NM_001205179,NM_001205180	NM_175016	65.861	57.5	13.6364	51.9084	54.8346	16.6667	0	0	0	3.06094	0.785742	-1.96185	-1.63926	NA	2.06523	2.61172	0.338694	0	0	0	0	0	0	0	0	0	0
ALKBH3	NM_139178	NM_026944	53.7815	52.8455	47.1774	57.1106	49.3612	45.6604	0	0	0	7.61875	9.0625	0.250355	0.567961	17.142	8.27187	23.1562	1.48512	0	0	0	0	0	0	0	0	0	0
ALKBH4	NM_017621	NM_028070	54.8387	61.5741	52.179	84.2105	66.5567	51.448	1	0	0	1.5957	1.50527	-0.084167	2.60681	4.45373	1.15046	0.915576	-0.329464	1	0	1	0	0	0	0	0	0	0
ALKBH5	NM_017758	NM_172943	69.8876	62.7104	44.1543	73.6614	63.2911	48.4265	2	0	0	4.74688	4.10313	-0.210255	1.09499	1.0459	4.78281	4.46016	-0.100765	0	0	0	0	0	0	0	0	0	0
ALKBH6	NM_032878,NM_198867	NM_198027	58.7413	59.8326	43.4426	66.6667	64.1698	53.5294	0	0	0	12.0312	7.33125	-0.714655	0.377202	3.95051	4.86562	9.275	0.930722	0	0	0	0	0	0	0	0	0	0
ALKBH7	NM_032306	NM_025538	52.381	59.6096	44.7826	57.732	68.3183	56.6787	0	0	0	18.1875	9.75	-0.899473	-2.29387	NA	24	7.575	-1.66372	0	0	0	0	0	0	0	0	0	0
ALKBH8	NM_138775	NM_026303	22.2222	43.208	30.4527	58.8652	43.4085	33.3506	1	0	0	5.30312	4.2625	-0.315143	-0.458515	NA	5.47656	4.65	-0.23604	1	0	0	0	1	0	1	1	1	0
ALMS1	NM_015120	NM_145223	70.4348	45.0697	26.9565	71.1712	44.4098	32.899	0	0	0	4.46016	7.01328	0.652995	-1.01011	NA	6.76562	6.66719	-0.0211448	0	0	0	0	0	0	0	0	0	0
ALPK1	NM_001102406,NM_001253884,NM_025144	NM_027808	51.8359	49.7024	NA	38.326	47.3896	40.9871	1	0	0	3.27578	1.57676	-1.05488	0.249826	NA	NA	NA	NA	0	0	0	0	0	0	1	1	1	1
ALPL	NM_000478,NM_001127501,NM_001177520	NM_007431,NM_001287172,NM_001287176	67.4897	56.3175	52.983	68.4825	59.4921	57.3298	0	0	0	24	24	0	0.682265	NA	24	24	0	0	0	0	0	0	0	0	0	0	0
ALS2	NM_001135745,NM_020919	NM_001159948,NM_146109,NM_028717	62.5885	50.7062	50.5547	59.5506	47.1049	38.3501	0	0	0	3.27656	4.21875	0.364632	0.164159	NA	3.65547	4.43594	0.279183	0	0	0	0	0	0	0	0	0	0
ALX3	NM_006492	NM_007441	82.7586	64.6318	48.924	81.8182	66.1822	57.2626	0	0	0	3.25	3.84531	0.242661	1.1019	2.23056	0.590479	1.33115	1.17272	0	0	0	0	0	0	0	0	0	0
ALX4	NM_021926	NM_007442	62.9091	63.1667	52.3822	76.9231	65.3722	56.6651	6	3	0	2.19062	2.34492	0.0981974	2.95225	NA	1.71289	1.60293	-0.0957219	0	1	0	0	0	1	0	0	0	0
ALYREF	NM_005782	NM_011568	77.7778	60.2865	42.9356	83.3333	63.6478	40.2027	0	0	0	19.7	6.10078	-1.69113	-1.02997	0.288889	20.6062	10.5422	-0.966907	0	0	0	0	0	0	0	0	0	0
AMACR	NM_001167595,NM_014324,NM_203382	NM_008537	66.6667	56.1955	41.9636	69.7917	52.3934	39.2027	3	1	0	2.19551	4.08281	0.895009	0.496588	NA	3.28672	3.89453	0.244801	1	1	1	0	0	1	0	0	0	0
AMBRA1	NM_001267782,NM_001267783,NM_017749	NM_001080754	60	54.4628	52.2417	57.1823	57.2034	54.9133	0	0	0	3.04531	2.5875	-0.235032	2.6873	7.04636	2.36602	1.91406	-0.305822	0	0	0	0	0	0	0	0	0	0
AMD1	NM_001033059,NM_001634	NA	NA	NA	NA	43.1677	42.7861	34.766	0	0	0	1.89961	1.08108	-0.813231	-0.0624556	0.672947	2.3832	2.0791	-0.196941	0	0	0	0	0	0	0	0	0	0
AMDHD2	NM_001145815,NM_015944	NM_172935	66.6667	60.9756	56.7073	75.2577	66.5909	68.4524	0	0	0	8.09844	19.3125	1.25382	0.560038	0.296775	1.36836	2.17676	0.669734	0	0	0	0	0	0	0	0	0	0
AMER1	NM_152424	NM_175179	57.7558	50.7208	43.1373	64.1026	55.5751	47.4171	6	1	0	2.48516	1.84932	-0.426345	1.05638	NA	2.27852	1.37353	-0.730201	0	0	0	0	0	0	0	0	0	0
AMFR	NM_001144	NM_011787	83.6634	53.8542	45.9785	83.8863	54.6584	44.4063	2	1	0	20.575	18.5625	-0.148501	1.79308	1.36923	9.44375	11.4375	0.27634	0	0	0	0	0	0	0	0	0	0
AMIGO2	NM_001143668,NM_181847	NM_001164602,NM_001164563,NM_178114	73.3333	51.2179	40.6181	67.0229	46.9726	31.0552	0	0	0	3.31641	2.68125	-0.306715	-0.0553716	NA	4.83594	4.54688	-0.0889204	0	0	0	0	0	0	0	0	0	0
AMIGO3	NM_198722	NM_177275	59.276	58.2187	53.3333	65.2941	65.1485	61.504	1	1	0	0.737988	4.79375	2.69948	1.4665	NA	2.03125	1.86836	-0.120596	0	0	0	0	0	0	0	0	0	0
AMMECR1	NM_001025580,NM_001171689,NM_015365	NM_019496	53.3333	58.2609	36.7221	67.9012	55.6886	35.4176	0	0	1	8.30937	4.69062	-0.82496	-0.191553	NA	7.28125	3.77813	-0.946516	0	0	0	0	0	0	0	0	0	0
AMMECR1L	NM_001199140,NM_031445	NM_001242430,NM_153515	58.2692	49.3033	44.6019	57.7061	50.911	45.4493	1	0	0	0.522217	2.22852	2.09336	1.36743	2.69686	2.03965	1.84394	-0.145525	0	0	0	0	0	0	0	0	0	0
AMOTL1	NM_130847	NM_001081395	73.8532	57.2755	47.6656	67.6471	56.6353	44.6794	3	0	2	3.57266	2.92109	-0.290488	0.947696	2.86177	3.48516	3.31562	-0.0719424	0	1	0	0	0	1	0	0	0	0
AMOTL2	NM_016201	NM_019764	64.9832	62.527	47.1963	67.6056	64.0205	47.7302	1	0	1	2.50273	13.2312	2.40237	1.73197	NA	1.77812	1.69922	-0.0654849	0	0	0	0	0	0	0	0	0	0
AMPD2	NM_001257360,NM_001257361,NM_004037,NM_139156,NM_203404	NM_028779	65	56.529	54.5135	66.886	60.0751	57.9181	2	0	0	6.74688	8.55312	0.342232	2.0049	3.37927	4.42109	4.30703	-0.0377097	0	0	0	0	0	0	0	0	0	0
AMTN	NM_212557	NM_027793	37.3626	53.271	34.9481	40.4494	51.9048	27.4368	0	0	0	24	24	0	-3.9932	NA	24	24	0	0	0	0	0	0	0	0	0	0	0
AMZ2	NM_001033569,NM_001033570,NM_001033571,NM_001033572,NM_001033574,NM_016627	NM_025275,NM_001252193	52.9199	47.3443	49.2983	63.6752	43.4543	32.3077	0	0	0	18.2125	8.09531	-1.16977	-0.405278	0.150556	13.4313	23.4625	0.804763	0	0	0	0	0	0	0	0	0	0
ANAPC1	NM_022662	NM_008569	60.4563	47.7121	43.8819	63.1579	44.9871	40.2056	0	0	1	12.6906	12.2953	-0.0456556	0.683276	0.840579	9.75	12.4422	0.351766	0	0	0	0	0	0	0	0	1	0
ANAPC11	NM_001002244,NM_001002245,NM_001002246,NM_001002247,NM_001002248,NM_001002249,NM_016476	NM_025389,NM_001038230	68.3092	54.5098	51.5786	62.7027	59.2157	55.2133	3	1	0	24	24	0	0.21809	0.622158	24	24	0	0	0	0	0	0	0	0	0	0	0
ANAPC13	NM_001242374,NM_001242375,NM_015391	NM_181394	67.9487	54.2222	45.8042	65.9794	45.3333	36.0045	1	0	0	5.13438	3.70391	-0.471141	0.383803	NA	6.34375	24	1.91963	0	0	0	0	0	0	0	0	0	0
ANAPC15	NM_014042	NM_001291352,NM_027532	57.2917	51.1278	49.4996	59.9099	50.5464	56.8027	0	0	0	24	24	0	-0.544926	2.23579	24	24	0	0	0	0	0	0	0	0	0	0	0
ANAPC16	NM_001242546,NM_001242547,NM_001242548,NM_173473,NR_038391,NR_038392	NM_025514	67.3171	56.4565	45.2816	55.8943	51.0511	41.7638	4	1	0	13.6906	9.89531	-0.468372	0.500167	NA	24	24	0	1	1	1	1	0	0	0	0	0	0
ANAPC2	NM_013366	NM_175300	60.5263	56.2053	49.115	71.2329	62.9	70.2532	0	0	0	5.96094	4.01094	-0.5716	0.414792	1.86153	4.38438	4.52656	0.0460448	0	0	0	0	0	0	0	0	0	0
ANAPC4	NM_013367	NM_024213	71.4859	43.6056	40.6621	77.5194	39.2254	33.6207	0	0	0	5.93281	2.62305	-1.17747	-1.13154	NA	6.36328	7.74844	0.284135	0	0	0	0	0	0	0	0	0	0
ANAPC5	NM_001137559,NM_016237	NM_001289519,NM_021505,NM_001042491	70.3704	51.6869	41.4201	64.7541	49.8677	37.4468	0	0	0	24	8.29219	-1.53321	-0.77407	1.35053	24	24	0	0	0	0	0	0	0	0	0	0	0
ANAPC7	NM_001137664,NM_016238	NM_019805	70.8955	53.1213	53.9717	100	47.9444	48.1511	2	1	0	6.825	5.17109	-0.40036	0.392462	3.61678	6.44375	9.00313	0.482525	0	0	0	0	0	0	0	0	0	0
ANGEL1	NM_015305	NM_144524	76.1194	56.0878	54.6374	81.4159	56.2842	50.7305	2	1	1	6.36328	4.97813	-0.354168	1.63278	NA	4.84844	4.95469	0.0312742	0	0	0	0	0	0	0	0	0	0
ANGEL2	NM_144567	NM_021421	70.1923	47.3394	41.5286	59.3548	42.7523	35.6768	1	0	1	4.86094	3.47852	-0.482763	-0.449773	6.00001	6.06719	3.72578	-0.703485	0	1	0	1	0	0	0	0	0	0
ANKFY1	NM_001257999,NM_016376,NR_047571	NM_009671	84.2105	48.8604	45.1233	68.4211	53.8571	44.9637	1	0	0	5.92188	5.84453	-0.0189668	1.49254	2.49024	4.44375	5.42969	0.289092	0	0	0	0	0	0	0	1	0	0
ANKH	NM_054027	NM_020332	73.3945	54.1582	44.6809	72.5076	54.2258	42.942	2	0	1	10.2656	7.29219	-0.493399	0.260533	NA	6.05156	7.39687	0.289608	1	0	1	0	1	0	0	0	0	0
ANKHD1	NM_001197030,NM_017747,NM_017978,NM_024668	NM_175375	69.2913	46.6327	32.0713	64.9351	46.1397	31.5068	0	0	0	8.07812	4.97813	-0.698418	-0.252962	1.26585	6.92656	4.15313	-0.737942	0	0	0	0	0	0	0	0	0	0
ANKHD1-EIF4EBP3	NM_020690	NA	NA	NA	NA	64.9351	46.575	50.7331	1	1	0	4.02813	8.53125	1.08265	-0.769607	4.60692	3.63281	4.51484	0.313589	0	0	0	0	0	0	0	0	0	0
ANKIB1	NM_019004	NM_001289527,NM_001003909	70.8054	47.9128	37.6633	65.1596	44.9235	33.0595	0	0	0	6.95469	5.81719	-0.257664	-0.676383	NA	6.1375	9.0625	0.562258	0	0	0	0	0	0	0	0	0	0
ANKLE1	NM_152363	NM_172756	65.3846	61.4953	46.9307	71.3768	64.1775	50.5032	2	1	0	2.06094	2.49336	0.27479	0.627326	NA	1.60527	2.01758	0.329806	1	0	1	0	0	0	0	0	1	0
ANKLE2	NM_015114	NM_027922,NM_001253814	75.1073	49.3955	37.9165	89.5522	53.5676	42.3126	0	0	0	4.38438	5.62812	0.360283	0.557313	11.0182	3.49141	3.61563	0.0504369	0	0	0	0	0	0	0	0	0	0
ANKMY1	NM_016552,NM_017844	NM_172850	45.7447	54.5576	52.4476	68.8	60.3993	56.1497	0	0	0	2.85	5.21953	0.872958	1.26183	2.1947	1.14299	1.83828	0.685541	0	0	0	0	0	0	0	0	0	0
ANKMY2	NM_020319	NM_146033	60.9442	48.0726	44.0449	61.4754	42.8356	37.7665	0	0	0	2.67266	5.49297	1.03931	-0.128381	3.91199	3.95625	5.47969	0.46996	0	0	0	0	0	0	0	0	0	0
ANKRD10	NM_017664	NM_001281974,NM_133971,NM_001281975	64.9635	57.6923	43.9512	73.3333	54.9485	36.1896	1	1	0	4.49922	4.18281	-0.105201	0.296548	NA	3.63633	4.04648	0.154187	0	0	0	0	0	0	0	0	0	0
ANKRD11	NM_001256182,NM_001256183,NM_013275,NR_045839	NM_001081379	46.3415	54.6394	49.0172	72.885	57.7327	52.6254	0	0	1	6.33984	4.64453	-0.448914	0.953649	19.9493	3.19375	2.57969	-0.308055	0	0	0	0	0	0	0	0	0	0
ANKRD13A	NM_033121	NM_026718	76.4493	54.9519	49.7139	78.7645	48.1669	42.5906	2	2	2	8.55469	11.2125	0.390321	1.2091	3.12308	6.71719	13.8844	1.04753	0	0	0	0	0	0	0	0	0	0
ANKRD13B	NM_152345	NM_172945	85.7143	60.9278	59.16	89.3805	63.53	63.1043	1	1	0	5.60938	4.98906	-0.169071	1.68702	2.83111	6.03594	5.61953	-0.103128	0	0	0	0	0	0	0	0	0	0
ANKRD13C	NM_030816	NM_001013806	86.8852	50.3075	39.2523	67.7914	46.064	32.786	0	0	2	3.94844	3.48945	-0.178281	-0.581524	NA	3.76758	4.49531	0.254784	0	0	0	0	0	0	0	0	0	0
ANKRD13D	NM_207354,NR_030767	NM_026720	72.1212	58.0308	50	85.8824	63.0363	55.2632	0	0	0	2.75	4.25	0.628031	1.49708	8.0974	1.26797	2.30938	0.864983	0	0	0	0	0	0	0	0	0	0
ANKRD16	NM_001009941,NM_001009943,NM_019046	NM_177268	54.0816	55.4328	41.9355	75.3223	61.6393	50.3704	0	0	0	4.425	2.76719	-0.677257	-0.196365	NA	1.79688	4.84297	1.4304	1	0	1	0	0	0	0	0	0	0
ANKRD17	NM_032217,NM_198889	NM_030886	79.7101	48.5919	36.0421	75.2137	46.9755	31.9502	0	0	0	4.44688	4.09687	-0.118268	-0.862554	9.24828	4.3125	4.80938	0.157325	0	0	0	0	0	0	0	0	0	0
ANKRD27	NM_032139	NM_145633	60	53.2571	45.8248	61.5385	51.9505	39.8601	0	0	0	4.96875	5.32344	0.0994753	0.540497	2.19707	4.01875	3.92656	-0.0334798	0	0	0	0	0	0	0	0	0	0
ANKRD28	NM_001195098,NM_001195099,NM_015199	NM_001024604	74.1935	45.5092	37.5062	78.3217	44.0544	34.6522	2	1	1	7.80156	5.72344	-0.446881	0.262964	NA	6.74688	7.325	0.118609	0	0	0	0	0	0	0	1	0	0
ANKRD29	NM_173505	NM_001190371	85	53.0108	37.5	82.5806	53.0905	35.8086	0	0	0	10.1281	6.06172	-0.740569	-0.0452612	NA	10.1547	14.5813	0.521968	0	0	0	0	0	0	0	0	0	0
ANKRD32	NM_032290	NM_134071	57.0248	38.2306	27.5488	66.25	37.3308	29.1367	0	0	0	3.98047	3.07344	-0.373085	-1.19996	NA	4.24492	6.83125	0.686412	0	0	0	0	0	0	0	0	0	0
ANKRD39	NM_016466	NM_026241	59.6154	62.1377	47.2629	84.375	63.587	43.949	0	0	0	7.48594	7.50938	0.00450974	-0.564737	NA	3.4332	14.9187	2.1195	0	0	0	0	0	0	1	0	0	0
ANKRD40	NM_052855	NM_027799	84.1897	51.6484	46.4519	84.7059	49.6838	42.4296	0	0	1	2.50625	0.586182	-2.09611	0.512295	3.28	2.18789	2.14297	-0.0299299	0	1	0	1	0	0	0	0	0	0
ANKRD50	NM_001167882,NM_020337	NM_001167883	49.7908	56.5584	42.3004	46.2428	42.7972	32.6319	0	0	1	0.359619	1.3456	1.90371	-0.449389	0.866801	1.98379	2.17266	0.131201	1	1	0	0	0	0	0	0	0	0
ANKRD52	NM_173595	NM_172790	85.5769	56.8864	53.5464	84.4444	57.3197	55.7826	13	9	0	7.08437	14.1687	1	2.30621	2.10858	4.35078	5.44766	0.324361	0	0	0	0	0	0	0	0	0	0
ANKRD54	NM_138797,NR_036556	NM_144849	71.5909	64	56.1135	73.1481	65.0055	54.6875	1	0	0	5.82344	5.05156	-0.205141	2.86308	2.44108	4.64062	3.12734	-0.569381	0	0	0	0	0	0	0	0	1	0
ANKRD9	NM_152326	NM_175207	67.4419	64.7299	55.06	70.6868	75.2621	46.6667	0	0	0	3.65469	3.31406	-0.141147	1.31305	2.23138	0.884351	2.29609	1.37649	0	0	0	0	0	0	0	0	0	0
ANKS1A	NM_015245	NM_181413	71.3115	59.4266	56.0197	73.2394	57.6505	51.1412	1	0	2	4.60938	3.23516	-0.510736	2.11893	4.01848	3.53203	2.74063	-0.365993	0	0	0	0	0	0	0	0	0	0
ANKS3	NM_001242929,NM_133450,NR_040252	NM_028301	72.5	55.0813	55.1899	76.3393	62.6061	61.809	2	1	0	4.81406	6.45469	0.423092	1.84125	4.44524	1.71162	3.40625	0.992821	0	0	0	0	0	0	0	0	0	0
ANKS6	NM_173551	NM_001024136	88.4615	61.9281	56.308	95.2381	61.2768	50.7539	4	0	1	7.50625	13.7875	0.877197	1.62272	NA	4.79297	6.2875	0.391567	1	1	0	0	1	1	0	1	0	1
ANKZF1	NM_001042410,NM_018089	NM_026187	54.7945	54.1611	48	58.4158	56.442	48.2143	2	1	0	3.41953	5.4125	0.662497	-0.311136	4.08135	2.90078	2.74063	-0.0819364	0	0	0	0	0	0	0	0	0	0
ANLN	NM_018685	NM_028390	64.3836	46.8212	37.4183	55.8824	42.1333	30.8144	0	0	0	6.05156	3.59219	-0.752445	-2.0789	2.51764	6.54141	9.09375	0.475275	0	0	0	0	0	0	0	0	0	0
ANO10	NM_001204831,NM_001204832,NM_001204833,NM_001204834,NM_018075	NA	NA	NA	NA	75.4386	43.2678	58.9655	0	0	0	22.1438	13.2063	-0.745679	1.40949	5.43351	23.0063	23.0063	0	0	0	0	0	0	0	0	0	0	0
ANO6	NM_001025356,NM_001142678,NM_001142679,NM_001204803	NM_001253813,NM_175344	74.4681	49.4883	48.2447	70.7463	43.176	38.7829	2	1	0	13.175	6.525	-1.01375	0.271889	0.999002	7.85313	13.6375	0.79624	0	0	0	0	0	0	0	0	0	0
ANP32A	NM_006305	NM_009672	61.6279	47.5806	45.7811	63.7427	47.8667	39.8706	0	0	1	7.4875	4.78906	-0.644741	-0.459793	2.96521	13.875	11.15	-0.315444	0	0	0	0	0	0	0	0	0	0
ANP32B	NM_006401	NM_130889	76.9036	46.6422	40.5567	74.4986	43.9153	36.9863	0	0	1	13.2469	5.34453	-1.30952	-2.74326	6.35558	24	11.8688	-1.01587	0	0	0	0	0	0	0	0	0	0
ANP32E	NM_001136478,NM_001136479,NM_030920	NM_023210	58.9744	47.3819	41.1682	52.7027	42.5031	31.4587	0	0	1	10.1828	4.53359	-1.16741	-1.86145	0.384304	8.77969	17.2688	0.975922	0	0	0	0	0	0	0	0	0	0
ANPEP	NM_001150	NM_008486	63.3663	52.3613	51.4286	69.1781	57.3003	58.1498	1	1	1	24	24	0	-0.285476	NA	18.4625	24	0.378436	0	0	0	0	0	0	0	0	0	0
ANTXR1	NM_018153,NM_032208,NM_053034	NM_054041	59.7598	55.4766	44.8936	62.6404	52.8614	40.2655	3	0	1	13.5938	12.1656	-0.160132	0.220973	0.477272	13.1625	13.65	0.0524674	0	0	0	0	0	0	1	0	0	0
ANXA1	NM_000700	NM_010730	45.8213	46.0134	32.1678	31.0811	44.5725	29.9296	0	0	0	23.3125	7.02187	-1.73118	-3.37472	NA	24	24	0	0	0	0	0	0	0	0	0	0	0
ANXA11	NM_001157,NM_145868,NM_145869	NM_013469	64.1892	57.0106	50	72.1254	59.2885	47.3251	1	0	0	16.8625	10.1984	-0.72547	0.383951	2.74013	18.8656	14.1875	-0.41114	0	0	0	0	0	0	0	0	0	0
ANXA2	NM_001002857,NM_001002858,NM_001136015,NM_004039	NM_007585	64.2336	51.9608	51.7241	61.8182	48.1373	44.0501	0	0	0	24	24	0	0.17022	NA	24	24	0	0	0	0	0	0	0	0	0	0	0
ANXA3	NM_005139	NM_013470	63.1336	47.428	38.4804	66.129	42.7984	30.3571	0	0	0	24	13.775	-0.800982	-2.11404	NA	NA	24	NA	0	0	0	0	0	0	0	0	0	0
ANXA4	NM_001153	NM_013471	59.6639	51.1458	39.1775	62.5551	50	29.1886	0	0	0	24	24	0	-1.00872	NA	24	24	0	0	0	0	0	0	0	0	0	0	0
ANXA5	NM_001154	NM_009673	65.3061	49.2708	43.0622	66.0606	44.0291	36.9427	0	0	0	24	24	0	0.208451	1.5125	24	24	0	0	0	0	0	0	0	0	0	0	0
ANXA6	NM_001155,NM_001193544	NM_013472	64.6018	52.819	57.0621	74.1228	53.6597	51.3477	0	0	0	24	24	0	1.56525	3.28629	24	23.8125	-0.0113153	1	0	0	0	1	0	0	0	0	0
ANXA7	NM_001156,NM_004034	NM_009674,NM_001110794	60.4225	52.3707	42.6929	72.6027	49.4647	30.5723	0	0	0	16.0281	6.86406	-1.22347	-0.277811	2.4283	15.9688	12.175	-0.39133	0	0	0	0	0	0	0	1	0	0
AP1AR	NM_001128426,NM_018569	NM_145964	82.0225	52.7313	41.7278	71.1048	42.4642	28.8578	0	0	1	4.44219	2.38906	-0.894826	-1.35949	NA	4.50781	5.99375	0.411031	0	0	0	0	0	0	0	0	0	0
AP1B1	NM_001127,NM_001166019,NM_145730	NM_001243043	46.1538	53.86	53.1483	71.6578	58.2624	59.2463	3	3	0	24	24	0	2.38133	6.22892	24	24	0	0	0	0	0	0	0	0	0	0	0
AP1G1	NM_001030007,NM_001128	NM_001301211,NM_009677	71.3592	45.8434	42.8286	57.9618	44.0664	39.9901	4	1	0	5.08203	3.49375	-0.540629	0.905667	1.60592	6.02344	4.76719	-0.337449	0	0	0	0	0	0	0	0	0	0
AP1G2	NM_003917	NM_007455	62.069	56.734	48.0952	58.1602	58.0153	56.9061	1	0	0	3.13594	23.0063	2.87506	-0.0802151	4.48282	3.71953	4.88203	0.392361	0	0	0	0	0	0	0	0	0	0
AP1M1	NM_001130524,NM_032493	NM_007456	66.8478	52.9874	57.4841	73.4104	57.8616	59.6703	1	0	0	7.00312	6.04609	-0.211995	2.56419	3.90009	5.63125	5.45	-0.047199	0	0	0	0	0	0	0	0	0	0
AP1M2	NM_005498	NM_009678	67.0588	53.1447	51.7333	72.619	55.0314	55.1899	0	0	0	21.0125	11.5219	-0.866872	0.546958	NA	24	24	0	0	0	0	0	0	0	0	0	0	0
AP1S1	NM_001283	NM_007457	67.2	52.6205	56.0586	70	52.8302	55.7746	1	0	1	24	10.5906	-1.18025	0.775753	NA	24	24	0	0	0	0	0	0	0	0	0	0	0
AP1S3	NM_001039569	NM_183027	65.8333	40.6452	37.8437	69.7368	38.2796	38.7001	2	0	1	5.46016	3.17188	-0.783606	0.0607216	NA	2.62891	2.87305	0.128119	1	1	1	1	0	0	0	0	0	0
AP2A1	NM_014203,NM_130787	NM_007458	80	58.0777	60.274	79.6209	61.4714	59.322	1	0	0	24	18.7	-0.359996	0.546743	4.63851	24	15.2063	-0.65837	0	0	0	0	0	0	0	0	0	0
AP2A2	NM_001242837,NM_012305	NM_007459	78.8889	52.9996	52.1924	79.8122	56.2766	61.1111	2	1	0	7.67031	9.42031	0.29649	1.01336	6.97946	5.48594	4.88125	-0.168488	0	0	0	0	0	0	0	0	0	0
AP2B1	NM_001030006,NM_001282	NM_001035854	57.1429	48.1092	50.3555	59.2593	46.091	46.1369	1	0	1	24	24	0	1.56774	0.904092	24	24	0	0	1	0	0	0	1	0	0	0	0
AP2M1	NM_001025205,NM_004068	NM_009679	67.2727	52.1407	47.3361	71.9745	52.3041	59.7895	0	0	0	24	24	0	-0.0546364	3.94355	24	24	0	0	0	0	0	0	0	0	0	0	0
AP2S1	NM_004069,NM_021575	NM_198613	68.254	52.6807	66.065	66.6667	51.2821	67.9715	0	0	0	24	24	0	-0.0205756	1.07598	24	24	0	0	0	0	0	0	0	0	0	0	0
AP3B1	NM_001271769,NM_003664	NM_009680	72.9167	48.1615	42.4731	67.0455	41.4307	36.2847	0	0	0	20.4812	7.53047	-1.44349	-1.1157	1.18596	24	24	0	0	0	0	0	0	0	0	0	0	0
AP3D1	NM_001261826,NM_003938	NM_007460	73.6364	55.25	51.2088	81.1659	58.3882	57.4684	1	0	0	15.8094	15.9781	0.0153178	2.10323	13.2489	9.59219	8.00625	-0.260733	0	0	0	0	0	0	0	0	0	0
AP3M1	NM_012095,NM_207012	NM_018829	61.7834	42.4821	40.8448	50.1577	41.8457	40.1914	1	0	0	6.10469	4.62266	-0.401196	0.182837	NA	7.2	7.0625	-0.0278179	1	0	1	0	0	0	0	0	0	0
AP3M2	NM_001134296,NM_006803	NM_029505,NM_001122820	65.8768	51.6309	48.9745	65.5172	46.9372	42.6484	0	0	0	1.33276	3.8625	1.53511	0.578598	2.95322	2.46797	2.2375	-0.141437	0	0	0	0	0	0	0	0	0	0
AP3S1	NM_001284	NM_009681	84.375	40.0344	33.7079	79.3103	38.1443	33.5025	0	0	0	24	8.02656	-1.58018	-2.17259	NA	24	24	0	0	0	0	0	0	0	0	0	0	0
AP3S2	NM_005829,NR_023361,NR_037582	NM_009682	60.3175	47.7663	50.3494	64.2202	47.079	50	3	0	0	3.40469	12.0938	1.82867	2.34151	8.52849	2.59414	2.23769	-0.213243	1	1	1	1	0	1	1	1	0	0
AP4B1	NM_001253852,NM_001253853,NM_006594	NM_026193,NM_001163552	60.7821	49.7519	37.8793	58.6022	47.8378	35.443	0	0	0	3.28594	2.73633	-0.264064	-0.751394	NA	3.575	2.99297	-0.256366	0	0	0	0	0	0	0	0	0	0
AP4M1	NM_004722	NM_021392	56.6138	53.6296	46.1187	67.7885	58.0764	51.3423	0	0	0	4.53594	3.91875	-0.211007	0.827095	NA	1.90459	3.06875	0.688171	0	0	0	0	0	0	0	0	0	0
AP4S1	NM_001128126,NM_001254726,NM_001254727,NM_001254728,NM_001254729,NM_007077	NM_021710	66.1905	41.1494	41.8605	56.2982	35.8621	44.8316	0	0	0	4.04844	2.97422	-0.444855	0.10809	NA	2.99063	1.60635	-0.896663	1	1	1	1	0	0	0	0	0	0
AP5B1	NM_138368	NM_001033448	64.8438	61.5735	54.5455	0	67.2355	52.3749	6	1	0	1.56611	2.34492	0.582352	1.7407	NA	1.43437	1.34893	-0.088611	1	1	1	1	1	1	0	1	1	1
AP5M1	NM_018229,NR_026895	NM_144535	56.7568	43.0414	36.7479	51.2881	39.5112	32.887	0	0	1	3.87422	3.40977	-0.184233	-1.62048	NA	4.54141	5.33906	0.233448	0	0	0	0	0	0	0	0	0	0
AP5S1	NM_001204446,NM_001204447,NM_018347	NM_027129	53.0686	57.5636	56.3725	68.9243	62.6866	54.9505	1	0	0	1.9084	5.68984	1.57603	3.28244	2.29845	1.98281	1.68154	-0.237763	1	0	1	0	0	0	0	0	0	0
AP5Z1	NM_014855	NM_172725	64.6341	61.2211	51.5867	70.5882	66.0891	62.8571	4	2	1	4.13516	6.0375	0.54601	2.40393	2.24258	2.40078	3.29297	0.455885	0	0	0	0	0	0	0	0	1	0
APAF1	NM_001160,NM_013229,NM_181861,NM_181868,NM_181869	NM_009684,NM_001042558	66.3856	46.16	39.1712	67.2444	41.0195	37.67	0	0	0	4.15234	2.79336	-0.571925	0.373428	0.887399	3.83281	3.48672	-0.136534	1	1	1	1	0	0	0	0	0	0
APBA3	NM_004886	NM_018758	59.0909	63.6946	41.2698	73.4463	66.2616	55.336	1	0	0	6.7	4.58672	-0.546699	0.361513	NA	4.34063	2.81641	-0.624047	0	0	0	0	0	0	0	0	0	0
APBB2	NM_001166050,NM_001166051,NM_001166052,NM_001166053,NM_001166054,NM_004307,NM_173075	NM_001201413	57.4713	54.1063	46.3303	54.4444	51.2719	38.0379	1	0	1	4.39375	2.67188	-0.7176	0.0811561	NA	NA	NA	NA	0	1	0	1	0	1	0	0	0	0
APBB3	NM_006051,NM_133172,NM_133173,NM_133174	NM_146085	65.7321	56.1259	48.3871	71.0306	59.8625	49.8423	0	0	0	3.64297	6.50781	0.837058	-0.566229	NA	1.59092	3.79375	1.25377	0	0	0	0	0	0	0	0	0	0
APEH	NM_001640	NM_146226	65	56.6621	52.8302	72.25	58.1173	55.3459	0	0	0	24	24	0	0.950407	6.45153	24	17.0437	-0.493792	0	0	0	0	0	0	0	0	0	0
APEX1	NM_001244249,NM_001641,NM_080648,NM_080649	NM_009687	59.6639	51.6771	43.3735	58.4337	52.6646	35.2273	1	0	0	6.58125	4.6125	-0.512813	-2.609	1.62239	9.6375	15.9313	0.725129	0	0	0	0	0	0	0	0	0	0
APEX2	NM_001271748,NM_014481	NM_029943	52.0548	54.2876	47.6923	66	57.5466	49.0868	1	1	0	3.15	3.95	0.326501	-0.133905	1.06192	2.81328	2.64219	-0.0905205	0	0	0	0	0	0	0	0	0	0
APH1A	NM_001077628,NM_001243771,NM_001243772,NM_016022,NR_045033,NR_045034,NR_045035	NM_146134	72.2772	54.6366	NA	67.6692	55.1075	52.6269	2	2	0	9.73438	6.69531	-0.539937	1.40228	1.14954	8.7875	7.10469	-0.306681	0	0	0	0	0	0	0	0	0	0
API5	NM_001142930,NM_001142931,NM_001243747,NM_006595,NR_024625	NM_007466	72.2222	45.3465	39.7689	67.052	41.7822	34.6506	0	0	2	8.6125	4.09063	-1.07411	-0.264545	0.270089	15.9875	24	0.58609	0	0	0	0	0	0	0	0	0	0
APIP	NM_015957	NM_019735	63.7168	47.9339	35	70.3704	43.4842	26.1283	0	0	0	17.375	6.44688	-1.43034	-2.14928	NA	24	24	0	0	0	0	0	0	0	0	0	0	0
APITD1	NM_199294,NR_036462	NM_027263	70.7547	52.2145	55.3043	67.5481	44.8441	34.878	0	0	0	6.52344	6.61406	0.0199043	-0.672346	NA	8.98594	24	1.41729	0	0	0	0	0	0	0	0	0	0
APMAP	NM_020531	NM_027977	59.0909	50.2404	44.1602	70.297	54.0368	49.4822	1	0	0	24	24	0	1.20265	1.36667	15.6094	24	0.620621	0	0	0	0	0	0	0	0	0	0
APOA1BP	NM_144772	NM_144897	60	55.8304	44.4444	89.7436	58.3622	48.3721	2	1	0	24	22.2375	-0.11004	-1.17521	0.583334	24	24	0	0	0	0	0	0	0	0	0	0	0
APOBEC3B	NM_001270411,NM_004900	NA	NA	NA	NA	49.0909	53.3507	35.9281	0	0	0	24	10.9563	-1.13128	-1.63417	NA	23.9563	22.3562	-0.0997239	0	0	0	0	0	0	0	0	0	0
APOL2	NM_030882,NM_145637	NA	NA	NA	NA	54.4643	53.0572	51.6318	2	0	0	2.86719	3.30313	0.204195	1.02555	NA	2.16445	2.3375	0.110964	0	1	0	1	0	0	0	0	1	0
APOM	NM_001256169,NM_019101,NR_045828	NM_018816	54.7401	54.6248	53.0973	0	0	0	0	0	0	24	24	0	-0.568467	NA	24	24	0	0	0	0	0	0	0	0	0	0	0
APOO	NM_024122,NR_026545	NM_026673	78.3784	43.0486	35.3333	67.2269	46.0637	34.0136	1	0	0	24	8.45625	-1.50494	-3.28473	NA	24	24	0	0	0	0	0	0	0	0	0	0	0
APOOL	NM_198450	NM_026565	56.8182	43.2331	32.3467	52.381	43.6183	36.4958	1	0	0	7.40469	6.54531	-0.177977	-0.610233	NA	7.55938	12.3875	0.712546	1	1	1	1	0	0	1	0	0	1
APOPT1	NM_032374	NM_026511	75	52.1589	43.6123	0	47.504	51.5498	2	1	0	6.62656	4.4375	-0.578514	-0.30603	6.66225	14.8812	24	0.689539	1	0	1	0	0	0	0	0	0	0
APP	NM_000484,NM_001136016,NM_001136129,NM_001136130,NM_001136131,NM_001204301,NM_001204302,NM_001204303,NM_201413,NM_201414	NM_001198825,NM_007471,NM_001198824,NM_001198826,NM_001198823	74.4966	55.4598	36.9248	76.5	52.3936	36.9643	0	0	1	24	24	0	-0.513215	2.50498	24	24	0	0	0	0	0	0	0	0	0	0	0
APPBP2	NM_006380	NM_025825	72.5857	46.0182	40.0547	69.4444	41.0125	35.64	0	0	0	3.09687	3.10859	0.00544905	-0.20346	NA	4.14844	5.5125	0.410139	0	1	0	1	0	0	0	0	0	0
APPL1	NM_012096	NM_145221	54.7558	42.0904	38.4177	80.2721	41.4085	34.2321	0	0	1	7.59375	4.575	-0.731041	-1.56187	0.401952	7.11953	7.93906	0.157187	0	1	0	1	0	0	0	0	0	0
APPL2	NM_001251904,NM_001251905,NM_018171	NM_145220	76.4331	49.7738	41.4188	79.8165	46.5664	38.5447	1	0	0	5.52969	6.04531	0.128619	0.0871024	0.598176	5.70078	7.34375	0.365357	0	0	0	0	0	0	0	0	0	0
APRT	NM_000485,NM_001030018	NM_009698	61.3333	59.4843	55.6452	80	64.6409	58.5153	2	2	0	24	24	0	-0.675911	0.844244	24	24	0	0	0	0	0	0	0	0	0	0	0
APTX	NM_001195248,NM_001195249,NM_001195250,NM_001195251,NM_001195252,NM_001195254,NM_175069,NM_175073,NR_036576,NR_036577,NR_036578,NR_036579	NM_025545	53.6723	50.5345	47.8334	70.2703	49.2849	42.9372	1	0	0	6.07969	4.82812	-0.332534	0.476101	3.6991	5.47422	5.76094	0.0736506	0	0	0	0	0	0	0	0	0	0
AQP3	NM_004925	NM_016689	70.2703	57.9067	46.0591	77.6699	60.5233	50.2812	0	0	1	10.0656	6.62188	-0.604126	0.958002	NA	9.22031	6.08437	-0.599707	0	0	0	0	0	0	0	0	0	0
AQR	NM_014691	NM_009702	67.052	47.8408	29.368	61.326	41.8573	30.1587	0	0	0	9.32656	6.52109	-0.516232	-0.525802	NA	10.575	13.7125	0.374834	0	0	0	0	0	0	0	0	0	0
AR	NM_000044,NM_001011645	NM_013476	52.459	55.3333	40.4578	57.9372	58.5233	42.1216	6	3	1	4.35781	3.91484	-0.154649	0.559813	NA	4.44688	3.89688	-0.190474	0	0	0	0	0	0	0	0	1	0
ARAF	NM_001256196,NM_001256197,NM_001654	NM_009703	56.9343	56.2534	48.5222	60.6635	59.4179	55.6034	1	0	0	7.725	7.05234	-0.131432	0.303789	2.62684	5.91016	5.89531	-0.0036278	0	0	0	0	0	0	0	0	0	0
ARAP1	NM_001040118,NM_001135190,NM_015242	NM_001040111	66.5323	59.154	54.7993	65.0794	62.3248	59.1597	1	1	0	6.75625	5.5625	-0.280489	2.70052	17.7576	4.72578	5.07188	0.101966	0	0	0	0	0	0	0	0	0	0
ARAP3	NM_022481	NM_139206,NM_001205336	54.2373	57.5482	49.4526	75.641	60.2157	48.2696	1	0	0	4.95625	5.16094	0.0583843	2.11732	0.550002	4.32031	4.40469	0.027904	1	0	0	0	1	0	0	0	0	0
ARCN1	NM_001142281,NM_001655	NM_145985	73.4104	44.0755	41.7266	69.5652	44.401	41.2425	1	0	1	6.97969	4.57422	-0.609637	0.82821	1.5081	7.60313	4.32031	-0.815457	0	1	0	1	0	0	0	0	0	0
ARF1	NM_001024226,NM_001024227,NM_001024228,NM_001658	NM_007476,NM_001130408	70.2417	52.0147	48.1267	68.5315	57.5092	51.7932	0	0	1	10.55	8.54063	-0.304829	2.00367	2.49016	7.62344	5.875	-0.375853	0	0	0	0	0	0	0	0	0	0
ARF3	NM_001659	NM_007478	69.4704	53.2967	52.1018	66.7984	52.9304	50.9861	0	0	1	11.8984	6.67969	-0.83292	0.975055	0.297562	10.7312	10.3031	-0.0587355	0	0	0	0	0	0	0	0	0	0
ARF4	NM_001660	NM_007479	70.8092	45.1197	35.6583	64.6552	42.3573	33.4511	1	0	0	15.7281	7.69375	-1.03159	0.431046	0.211198	18.8031	24	0.352062	0	0	0	0	0	0	0	0	0	0
ARF5	NM_001662	NM_007480	86.0465	56.7219	56.0811	83.6735	55.8011	59.1133	0	0	0	24	24	0	0.203069	0.00516129	24	24	0	0	0	0	0	0	0	0	0	0	0
ARF6	NM_001663	NM_007481	77.9412	58.1439	37.5094	74.7182	55.8712	33.871	1	0	1	1.79883	1.28379	-0.486649	-0.41136	0.631251	1.52109	1.54492	0.0224247	0	0	0	0	0	0	0	0	0	0
ARFGAP1	NM_018209,NM_175609	NM_145760,NM_001177710	66.4537	54.7791	54.9308	75.8929	58.9681	63.5889	4	0	0	3.12891	3.28594	0.0706469	2.78538	16.8185	1.98711	2.30293	0.2128	0	0	0	0	0	0	0	0	0	0
ARFGAP2	NM_001242832,NM_032389	NM_023854	66.5738	52.4632	55.1483	74.2647	56.0664	56.7568	2	1	0	4.4375	7.46094	0.74961	2.54832	4.57507	3.03906	2.85938	-0.0879267	0	0	0	0	0	0	0	0	0	0
ARFGAP3	NM_001142293,NM_014570	NM_025445	65.3061	54.2857	46.455	75.9091	45.648	36.7232	0	0	0	6.02813	3.79297	-0.668382	-0.0555353	NA	6.46406	6.73438	0.0591028	0	0	0	0	0	0	0	0	0	0
ARFGEF2	NM_006420	NM_001085495	82.6772	52.0915	46.1703	84.8684	47.9843	36.4625	2	0	0	6.79063	5.82656	-0.220899	0.177015	3.65045	4.65156	6.28906	0.43513	0	0	0	0	0	0	0	0	0	0
ARFIP1	NM_001025593,NM_001025595,NM_014447	NM_001081093	69.6833	43.5829	NA	59.058	39.2788	33.8061	1	0	0	4.82344	2.6332	-0.873243	-0.0167503	NA	4.87812	5.39687	0.145798	0	0	0	0	0	0	0	0	0	0
ARFIP2	NM_001242854,NM_001242855,NM_001242856,NM_012402	NM_029802	64.9533	55.0682	49.3857	68.5259	55.1657	51.1934	1	1	0	7.32188	6.58125	-0.153852	1.70514	2.66581	6.08281	5.33594	-0.188997	1	0	1	0	1	0	0	1	0	0
ARFRP1	NM_001134758,NM_001267544,NM_001267545,NM_001267546,NM_001267547,NM_001267548,NM_001267549,NM_003224,NR_051954,NR_051955,NR_051956,NR_051957,NR_051958	NM_001165991,NM_001165992,NM_029702	71	50	47.4101	78	57.5908	64.2222	4	2	0	2.98008	9.55	1.68015	2.20154	6.11078	0.65542	1.50508	1.19935	0	0	0	0	0	0	0	0	0	0
ARG2	NM_001172	NM_009705	59.1398	47.8873	34.4444	71.5517	47.6995	40.801	1	0	0	19.4	18.2688	-0.0866787	-0.521804	NA	24	24	0	0	0	0	0	0	0	0	0	0	0
ARGLU1	NM_018011	NM_176849	80.9091	54.4118	37.9259	67.2065	53.2847	32.5513	0	0	1	1.92266	2.88047	0.583203	-3.12517	5.81251	2.40937	3.66328	0.604477	0	0	0	0	0	0	0	0	0	0
ARHGAP1	NM_004308	NM_146124	53.1792	53.1061	52.1398	64.6341	56.5152	57.3904	3	3	0	7.83281	7.4	-0.0820052	2.19998	2.79713	5.10703	4.74219	-0.106932	0	1	0	1	0	0	0	0	0	0
ARHGAP10	NM_024605	NM_030113	78.2258	50.0212	56.962	0	46.5057	55.6835	2	2	0	9.26562	13.2063	0.511261	1.05097	2.71506	5.93125	10.45	0.817095	0	0	0	0	0	0	0	0	0	0
ARHGAP11A	NM_014783,NM_199357	NM_181416	60.3175	45.3441	45.41	59.5568	39.2904	34.0285	0	0	2	3.47734	4.07266	0.227984	-1.41424	0.0818735	3.00898	3.97187	0.400544	0	1	0	1	0	0	0	0	0	0
ARHGAP11B	NM_001039841	NA	NA	NA	NA	59.3103	43.5323	32.3529	0	0	0	3.01953	9.0875	1.58956	-0.45861	2.27268	1.575	2.31211	0.553858	0	0	0	0	0	0	0	0	0	0
ARHGAP17	NM_001006634,NM_018054	NM_001122641,NM_144529	77.0642	54.1126	41.866	80.6452	54.195	46.0081	0	0	0	6.8875	3.09922	-1.15208	0.816362	1.14966	4.96328	6.2875	0.341192	0	0	0	0	0	0	0	0	0	0
ARHGAP18	NM_033515	NM_176837	55.1402	46.0843	37.1778	50.5618	44.0261	31.6643	0	0	2	6.27266	3.60586	-0.798733	-1.26494	NA	4.53984	5.05781	0.155871	0	0	0	0	0	0	0	0	0	0
ARHGAP19	NM_001204300,NM_001256423,NM_032900	NM_027667	65	48.0135	46.1923	60.8696	45.9259	42.9223	1	0	0	4.66641	3.64023	-0.358281	1.35986	2.16477	NA	NA	NA	0	0	0	0	0	0	0	0	0	0
ARHGAP21	NM_020824	NM_001128084	48.5531	49.8466	34.3001	57.7002	44.6146	32.3786	0	0	1	3.79375	3.21602	-0.23835	-1.24558	1.45882	3.60586	4.95156	0.457541	0	0	0	0	0	0	0	0	0	0
ARHGAP22	NM_001256024,NM_001256025,NM_001256026,NM_021226,NR_045675	NM_153800	52.6718	59.3172	57.0225	61.791	63.5897	54.918	0	0	0	2.3375	4.40625	0.914585	1.40739	2.67758	1.03851	1.94981	0.908811	0	0	0	0	0	0	0	0	0	0
ARHGAP23	NM_001199417	NM_021493	62.7566	63.7715	52.2353	80	66.6443	54.5775	0	0	2	4.43594	4.51562	0.0256865	2.07822	NA	2.85039	2.94375	0.0464953	0	0	0	0	0	0	0	0	0	0
ARHGAP35	NM_004491	NM_172739	69.425	48.3111	49.8983	0	47.7333	56.814	2	2	0	4.61094	3.61875	-0.349569	1.21909	4.35482	4.03281	3.45742	-0.22209	0	0	0	0	0	0	0	0	0	0
ARHGAP39	NM_025251	NM_001168288	68.7861	57.7778	57.2718	44.3243	65.7997	61.9469	0	0	0	3.79062	3.24063	-0.226164	2.12064	2.03781	2.39219	2.50195	0.0647239	0	0	0	0	0	0	0	0	0	0
ARHGAP44	NM_014859	NM_001099288	77.8195	57.0552	47.9937	80.1223	56.4917	47.6223	2	2	2	6.89375	6.25469	-0.140351	1.9275	NA	4.57656	5.33984	0.222533	0	0	0	0	0	0	0	0	0	0
ARHGAP5	NM_001030055,NM_001173	NM_009706	30.9942	37.234	31.7121	52.0635	37.3919	30.0837	0	0	4	6.74688	2.4168	-1.48112	-1.77873	NA	6.44375	14.4563	1.16572	0	0	0	0	0	0	0	0	0	0
ARHGDIA	NM_001185077,NM_001185078,NM_004309	NM_133796	68	53.3333	61.1358	68.3824	60.3252	66.5801	0	0	0	9.10313	8.26719	-0.138965	1.67295	5.00538	6.71719	5.13203	-0.388328	0	0	0	0	0	0	0	0	0	0
ARHGEF1	NM_004706,NM_198977,NM_199002	NM_001130152,NM_001130153,NM_008488	74.1451	59.5729	55.8833	77.9817	63.4173	60.8219	1	0	0	8.99844	5.15	-0.805102	2.53603	3.91191	5.54063	5.70937	0.0432841	0	0	0	0	0	0	0	0	0	0
ARHGEF10	NM_014629	NM_172751	71.4894	56.2407	44.8606	75.2809	53.6307	39.9855	0	0	0	5.55625	5.83594	0.070853	0.691007	2.37243	4.84687	6.53594	0.431339	0	0	0	0	0	0	0	0	0	0
ARHGEF10L	NM_001011722,NM_018125	NM_172415	78.75	60.2665	46.1386	60.4651	63.2823	49.2929	1	0	1	3.93906	4.25938	0.112789	1.98209	4.13973	2.11992	2.45293	0.210495	0	0	0	0	0	0	0	0	0	0
ARHGEF11	NM_014784,NM_198236	NM_001003912	48.3137	54.7757	47.7981	38.9423	56.8396	50.6897	1	0	2	5.79219	3.8793	-0.578313	1.37387	3.00771	4.20937	4.95	0.233822	0	0	0	0	0	0	0	0	0	0
ARHGEF12	NM_001198665,NM_015313	NM_027144	62.0079	49.6224	46.236	54.0299	45.1944	38.0531	1	0	0	18.2875	13.8438	-0.401623	0.0773488	4.24679	16.525	24	0.538384	0	0	0	0	0	0	0	1	0	0
ARHGEF16	NM_014448	NM_001112744	79.0323	58.6835	51.4894	81.8548	63.4742	62.3574	1	1	0	5.97813	5.875	-0.0251042	2.55109	NA	3.50156	2.93281	-0.255714	0	0	0	0	0	0	0	0	0	0
ARHGEF17	NM_014786	NM_001081116	69.1943	60.8844	51.861	61.9048	63.9212	54.5625	3	2	0	3.17773	3.86094	0.280953	1.94532	NA	2.10234	2.76602	0.395811	1	0	0	0	1	0	0	0	0	0
ARHGEF18	NM_001130955,NM_015318	NM_133962	68.3453	57.6973	50.2904	72.3301	61.3189	59.2574	2	0	0	5.91875	5.4875	-0.109143	2.8691	4.62611	3.51914	3.45312	-0.0273208	0	0	0	0	0	0	0	0	0	0
ARHGEF19	NM_153213	NM_172520	60.9375	62.7646	55.0365	67.1533	63.8439	55.6936	0	0	1	3.77578	3.00078	-0.331437	1.77974	NA	2.10859	2.30742	0.130001	0	0	0	0	0	0	0	0	0	0
ARHGEF2	NM_001162383,NM_001162384,NM_004723	NM_008487	71.8954	55.7133	48.2759	71.1864	59.2705	48.9574	4	1	0	3.1375	4.47422	0.51202	1.47489	6.33335	2.27969	2.47695	0.11973	0	0	0	0	0	0	0	0	0	0
ARHGEF3	NM_001128615,NM_001128616,NM_019555	NM_001289688,NM_001289686,NM_001289687,NM_027871	62.5	52.5063	43.9481	71.8182	49.3739	39.0389	1	1	3	2.13516	0.985498	-1.11542	0.522308	NA	3.27813	2.68008	-0.290596	0	0	0	0	0	0	0	0	0	0
ARHGEF39	NM_032818	NM_001013377	64.7727	58.6473	45.5224	73.2143	60.4167	48.846	1	0	0	4.26328	2.96367	-0.524578	0.205984	NA	5.06641	5.13125	0.0183476	1	0	1	0	0	0	0	1	0	0
ARHGEF40	NM_018071	NM_198249	77.4834	59.8375	49.8908	82.7586	62.6316	50.9781	2	0	0	4.8625	4.22813	-0.20168	2.01906	NA	3.44375	3.41914	-0.0103465	0	0	0	0	0	0	0	0	0	0
ARHGEF7	NM_001113511,NM_001113512,NM_001113513,NM_003899,NM_145735	NM_001113517	85.7143	53.9804	47.8189	49.4792	48.9438	48.0351	0	0	4	3.7625	2.2584	-0.736392	1.31523	NA	3.14883	3.06992	-0.036613	0	0	0	0	0	0	0	0	0	0
ARID1A	NM_006015,NM_139135	NM_001080819	NA	59.6322	41.421	78.0161	59.8279	40.0295	1	0	1	1.69121	0.455249	-1.89333	0.362976	3.44207	2.85039	2.41602	-0.23853	0	0	0	0	0	0	0	0	0	0
ARID1B	NM_017519,NM_020732	NM_001085355	85.7143	60.2673	41.8472	0	60.1848	34.349	0	0	2	5.57812	3.61719	-0.624912	0.221715	2.7465	5.10234	4.16563	-0.292627	0	0	0	0	0	0	0	0	0	0
ARID2	NM_152641	NM_175251	67.2131	49.7357	37.6812	0	44.0632	33.0629	1	0	5	2.38711	0.659814	-1.85513	-0.771263	0.26826	4.94141	5.3125	0.104469	0	0	0	0	0	0	0	0	0	0
ARID4B	NM_001206794,NM_016374,NM_031371	NM_194262	70	42.0279	32.4125	66.8675	39.3755	31.4724	0	0	0	0.425342	0.414062	-0.0387741	-0.982916	1.02318	2.41211	3.19375	0.404956	0	0	0	0	0	0	0	0	0	0
ARIH1	NM_005744	NM_019927	82.397	48.9209	39.1183	77.0701	48.7455	38.6148	0	0	1	3.96914	3.87891	-0.033177	0.135402	1.22857	4.11562	5.26562	0.355493	0	0	0	0	0	0	0	0	0	0
ARIH2	NM_006321	NM_011790	57.0492	49.2901	49.2056	57.6923	49.9325	48.1922	1	0	0	7.64687	8.11719	0.0861097	0.956365	6.86652	6.44688	7.74844	0.265305	0	0	0	0	0	0	0	0	0	0
ARL1	NM_001177	NM_025859	56.7951	42.1245	37.56	65.7718	40.6593	35.9046	1	0	0	7.30938	4.24297	-0.784674	-1.48676	NA	12.4969	14.0125	0.165146	0	1	0	0	0	1	1	0	0	0
ARL14EP	NM_152316	NM_173750,NM_001025102	52.0245	45.2467	38.9006	55.4878	39.4636	35.8445	0	0	1	1.46094	1.58086	0.113814	-0.652612	0.473691	2.52734	3.97969	0.655033	0	0	0	0	0	0	0	0	0	0
ARL15	NM_019087	NM_172595	57.6389	49.2683	40.7678	58.5106	44.2276	32.5267	0	0	0	3.71133	5.09687	0.457677	0.0810109	0.0733837	NA	NA	NA	0	0	0	0	0	0	0	0	0	0
ARL16	NM_001040025	NM_197995	57.6271	53.2567	50.4717	54.5455	59.7643	50.7782	1	0	0	8.39531	8.98906	0.0985866	0.685974	2.83123	5.66094	5.29844	-0.095474	1	0	1	0	0	0	0	0	0	0
ARL2	NM_001199745,NM_001667	NM_019722	64.918	57.4775	60.2113	71.5789	59.4595	62.7273	0	0	0	24	24	0	0.2875	0.900009	24	24	0	0	0	0	0	0	0	0	0	0	0
ARL2BP	NM_012106	NM_024191	77.9817	47.561	49.0377	76.4463	42.8862	41.5813	1	1	0	9.84062	3.70273	-1.41016	0.0469459	NA	5.88281	7.89062	0.423633	0	0	0	0	0	0	0	0	0	0
ARL3	NM_004311	NM_019718	69.7674	49.7268	52.1739	71.519	44.6266	48.437	4	3	0	17.925	11.0219	-0.701603	-1.44237	NA	24	24	0	0	0	0	0	0	0	0	0	0	0
ARL4A	NM_001037164,NM_001195396,NM_005738,NM_212460	NM_007487,NM_001039515	65.7545	43.1177	37.7668	63.3987	39.9668	33.6705	0	0	0	0.373486	0.22522	-0.729722	-1.18483	NA	2.23769	1.76445	-0.342792	0	0	0	0	0	0	0	0	0	0
ARL5A	NM_001037174,NM_012097,NM_177985	NM_182994	80.4511	43.3333	37.5141	78.0564	38.3333	29.3506	0	0	2	6.25156	4.63281	-0.432328	-0.709584	NA	14.8812	24	0.689539	0	0	0	0	0	0	0	0	0	0
ARL5B	NM_178815	NM_029466	73.7762	44.0147	37.8901	72.4409	41.2963	31.127	1	0	0	2.29648	0.909009	-1.33706	-1.19092	NA	2.84063	3.95938	0.479064	0	0	0	0	0	0	0	0	0	0
ARL6IP1	NM_015161	NM_019419	60.3306	46.4052	43.2548	63.7681	44.9346	36.7025	0	0	1	6.85625	3.06875	-1.15977	-0.359191	0.2125	5.28125	4.92578	-0.100527	0	0	0	0	0	0	0	0	0	0
ARL6IP4	NM_001002251,NM_001002252,NM_016638,NM_018694	NM_144509	68.2997	56.6667	50.3226	67.2727	66.1001	64.9789	0	0	0	8.52187	24	1.49379	-1.14251	4.42876	24	24	0	0	0	0	0	0	0	0	0	0	0
ARL6IP5	NM_006407	NM_022992	58.3333	51.6755	45.3567	62.3853	49.5591	33.4022	0	0	0	12.7375	6.71094	-0.924496	-0.107158	0.571429	17.4594	24	0.459032	0	0	0	0	0	0	0	0	0	0
ARL8A	NM_001256129,NM_138795	NM_026823	85.0649	52.4064	49.0982	82.4561	53.1194	53.81	0	0	1	2.81367	1.67383	-0.749303	0.543662	3.25582	1.63203	2.06777	0.341409	0	0	0	0	0	0	0	0	0	0
ARL8B	NM_018184	NM_026011	75	45.9893	40.2579	75.5656	43.8503	35.724	0	0	1	10.6219	5.42188	-0.970175	0.561018	NA	12.6531	9.0875	-0.477539	0	0	0	0	0	0	0	0	0	0
ARMC1	NM_018120	NM_028840	63.9175	46.0542	39.1635	59.6078	44.0518	32.1465	0	0	0	4.84219	3.03125	-0.675746	0.271108	NA	5.86328	10.0828	0.782118	0	0	0	0	0	0	0	0	0	0
ARMC10	NM_001161009,NM_001161010,NM_001161011,NM_001161012,NM_001161013,NM_031905	NM_026034	64.2857	49.4028	41.9145	74.4898	44.7681	39.0909	1	0	0	13.6031	5.325	-1.35309	-0.165048	NA	16.1375	24	0.572617	1	0	1	0	0	0	0	1	0	0
ARMC5	NM_001105247,NM_024742	NM_146205	57.1429	63.1787	50.1767	68.0529	68.2336	56.1151	2	0	0	2.82539	3.03359	0.102577	2.35663	NA	1.88769	1.56133	-0.273852	0	0	0	0	0	0	0	0	0	0
ARMC6	NM_001199196,NM_033415	NM_133972	61.9835	58.3511	54.7667	69.1729	61.2858	59.8182	0	0	0	5.74219	5.30703	-0.113696	2.7598	2.61471	4.50156	3.42344	-0.39498	0	0	0	0	0	0	0	0	0	0
ARMC7	NM_024585	NM_177778	63.7037	60.469	51.7588	62.2517	63.4841	56.5607	1	0	0	0.323633	2.94883	3.18771	2.67625	9.80819	1.83262	0.958325	-0.935318	0	0	0	0	0	0	0	0	0	0
ARMC8	NM_001267041,NM_001267042,NM_014154,NM_015396,NM_213654,NR_049770	NM_028768	67.5889	45.2522	43.6341	57.5	42.1212	38.4122	0	0	0	2.58984	0.392188	-2.72325	-0.312887	NA	2.78906	2.25312	-0.307853	0	0	0	0	0	0	0	0	0	0
ARMC9	NM_001271466,NM_025139	NM_030184	57.7465	53.4637	49.1545	66.25	49.8498	30.0971	0	0	0	8.00156	5.18828	-0.625025	-0.289405	3.38048	7.08125	10.0047	0.498601	1	0	1	0	0	0	0	0	0	0
ARMCX2	NM_014782,NM_177949	NM_026139,NM_001166397,NM_001166398	55.1111	51.5499	40.6824	54.3599	51.9747	34.0686	0	0	0	3.50156	2.37773	-0.558412	-0.569301	NA	3.39141	3.89375	0.199277	0	0	0	0	0	0	0	1	0	0
ARMCX3	NM_016607,NM_177947,NM_177948	NM_027870	52.6316	44.2982	38.1571	55.4455	43.3333	34.7851	0	0	0	3.77461	4.08203	0.11296	-0.768166	9.65508	3.20859	4.35469	0.440628	1	0	0	0	1	0	1	1	0	0
ARMCX5	NM_001168478,NM_001168479,NM_001168480,NM_001168482,NM_001168485,NM_022838	NM_001009575	53.0806	42.7787	28.9231	49.8054	42.7549	30.3835	0	0	0	3.33438	3.25039	-0.0368031	-1.04188	NA	3.71016	5.625	0.600373	0	0	0	0	0	0	0	0	0	0
ARMCX6	NM_001009584,NM_001184768,NM_019007,NR_033669,NR_033670	NM_001007578	50	50.1104	51.8258	54.7826	50.0554	48.8333	0	0	0	2.70996	2.075	-0.385161	1.04452	NA	1.60371	2.39023	0.575738	0	0	0	0	0	0	0	0	0	0
ARNT	NM_001197325,NM_001668,NM_178427	NM_001037737	71.1409	51.5152	40.2299	73.1343	51.0127	40.7599	0	0	0	6.34844	4.88906	-0.376844	0.277324	2.9411	6.175	5.68125	-0.120231	0	0	0	0	0	0	0	0	0	0
ARNTL	NM_001030272,NM_001030273,NM_001178	NM_007489,NM_001243048	57.1154	49.5481	34.1948	56.0907	46.6454	33.5953	0	0	0	3.6918	4.16094	0.172586	-0.159412	NA	3.93359	5.03594	0.356412	0	0	0	0	0	0	0	0	0	0
ARPC1A	NM_001190996,NM_006409	NM_019767	63.0058	52.5606	43.6416	63.9752	51.3028	40.5405	0	0	0	24	9.7	-1.30698	-1.01642	3.06649	20.3	24	0.241555	0	0	0	0	0	0	0	0	0	0
ARPC1B	NM_005720	NM_023142	73.9726	58.2663	47.2283	80	61.3047	44.863	0	0	0	22.8062	13.3031	-0.777664	-0.871768	1.28572	24	24	0	0	0	0	0	0	0	0	0	0	0
ARPC2	NM_005731,NM_152862	NM_029711	75.4045	45.7364	48.4375	81.25	47.2868	37.8753	0	0	0	24	10.7406	-1.15996	-1.70795	0.72622	24	24	0	0	0	0	0	0	0	0	0	0	0
ARPC3	NM_005719	NA	NA	NA	NA	68.8172	41.527	39.3701	0	0	0	24	11.375	-1.07717	-2.35455	1.26667	24	24	0	0	0	0	0	0	0	0	0	0	0
ARPC4	NM_001024959,NM_001024960,NM_001198780,NM_005718	NM_026552,NM_001170486	72.5275	49.5069	53.1699	56.7568	45.5696	56.8539	1	1	0	16.025	14.8344	-0.11138	1.73393	3.92331	15.2875	8.99531	-0.765107	0	0	0	0	0	0	0	0	0	0
ARPC5	NM_001270439,NM_005717	NM_026369	71.5847	53.5088	40	69.5035	51.0965	34.354	0	0	1	8.2375	4.05469	-1.02262	0.516596	2.33882	12.4734	16.7625	0.426378	0	0	0	0	0	0	0	0	0	0
ARPC5L	NM_030978	NM_028809	75.4386	51.7316	43.883	81.3953	55.4113	45.0734	0	0	0	5.10703	3.50625	-0.542556	1.06747	2.04999	4.90469	6.23594	0.346445	0	0	0	0	0	0	0	0	0	0
ARPP19	NM_006628	NM_021548	74.3719	49.8525	37.8563	72.5806	48.0826	35.7523	0	0	2	6.20156	3.2	-0.95456	0.276915	0.440451	7.32188	8.13906	0.15265	0	1	0	1	0	0	0	0	0	0
ARRB2	NM_001257328,NM_001257329,NM_001257330,NM_001257331,NM_004313,NM_199004,NR_047516	NM_145429,NM_001271360	86.4802	55.2311	50.2804	77.6316	57.3171	51.6269	1	0	0	11.5547	24	1.05456	0.74155	4.24207	7.18281	5.62812	-0.351895	0	0	0	0	0	0	0	0	0	0
ARRDC1	NM_152285	NM_001162485	73.8318	58.0077	55.1181	87.8378	63.5177	64.4144	2	1	1	9.1375	5.325	-0.779018	0.128457	NA	6.15313	5.35156	-0.201359	0	0	0	0	0	0	0	0	0	0
ARRDC2	NM_001025604,NM_015683	NM_027560	59.5611	64.5425	52.4173	76.6667	67.4111	54.3134	3	1	0	3.24844	4.33047	0.414777	2.20924	12.4867	1.60205	1.48867	-0.105894	0	0	0	0	0	0	0	1	0	0
ARRDC3	NM_020801	NM_001042591	39.1667	47.3092	37.572	40.8333	43.8554	34.3049	0	0	0	0.56206	0.256445	-1.13207	-0.0756552	NA	0.943591	0.678857	-0.475054	0	0	0	0	0	0	0	0	0	0
ARSB	NM_000046,NM_198709	NM_009712	68.6869	55.7632	45.7768	48.1337	54.5568	43.1668	2	1	0	24	15.6844	-0.613706	0.169791	NA	24	14.9187	-0.685908	0	1	0	1	0	0	1	0	0	0
ARSJ	NM_024590	NM_173451	55.227	49.4157	34.9125	57.4324	47.6111	33.2161	0	0	0	0.323828	1.37373	2.0848	0.0313326	NA	1.40205	1.88027	0.423403	0	0	0	0	0	0	0	0	0	0
ARSK	NM_198150	NM_029847	53.5714	44.4644	33.8059	61.3924	41.2787	33.566	0	0	1	6.71563	3.06328	-1.13244	0.0304341	NA	NA	NA	NA	1	0	1	0	0	0	1	1	0	0
ARV1	NM_022786	NM_026855	71.1111	51.4357	43.2602	51.7241	43.9951	32.8333	0	0	0	6.19688	5.20625	-0.251296	-2.54396	NA	24	24	0	0	0	0	0	0	0	1	0	0	0
ASAH1	NM_001127505,NM_004315,NM_177924	NM_019734	69.8413	42.7848	40.4575	67.6282	43.0976	37.2987	0	0	0	24	24	0	-0.0565611	NA	24	24	0	0	0	0	0	0	0	0	0	0	0
ASAP1	NM_001247996,NM_018482	NM_010026	76.9565	50.4646	45.1542	75.4386	48.0236	36.8241	0	0	2	6.41719	7.05234	0.136162	-0.439483	1.08935	7.10469	10.2937	0.534925	0	0	0	0	0	0	0	0	0	0
ASAP3	NM_001143778,NM_017707	NM_001008232	64.9351	59.1897	52.2861	83.871	59.8451	51.1214	1	0	0	5.17109	8.41406	0.702333	1.94103	NA	4.33047	4.37031	0.0132133	0	0	0	0	0	0	0	0	0	0
ASB1	NM_001040445	NM_001039126	63.9405	57.1711	47.438	76.7442	59.9206	50.636	8	3	0	2.49258	3.975	0.673316	1.40296	NA	1.43291	1.4748	0.0415762	0	0	0	0	0	0	0	1	0	0
ASB13	NM_024701,NR_024581,NR_037164	NM_178283	69.3069	57.2282	42.9448	84.0909	62.0072	52.8711	2	0	1	3.69687	3.15	-0.230954	2.50768	1.40721	2.34707	2.36914	0.0135032	1	0	1	0	0	0	0	0	0	0
ASB3	NM_001201965,NM_016115,NM_145863	NM_023906	62.234	42.7757	32.8317	65.3465	42.5819	30.0191	0	0	0	3.81016	3.26875	-0.221111	-0.300378	NA	3.48086	2.59375	-0.424404	0	0	0	0	0	0	0	0	0	0
ASB6	NM_001202403,NM_017873,NM_177999	NM_133346	53.6563	60.3023	57.0659	78.8235	60.6635	56.3402	2	2	0	2.67891	4.57812	0.773113	2.15609	11.4088	1.95781	1.63447	-0.260417	0	1	0	1	0	0	0	0	0	0
ASB7	NM_024708,NM_198243	NM_080443	61.2	50.5747	40.7637	61.2484	47.8579	37.6583	2	0	1	0.991072	0.192407	-2.36483	0.571463	NA	1.32656	1.42783	0.106133	0	0	0	0	0	0	0	0	0	0
ASB8	NM_024095	NM_030121,NM_001170710,NM_001170711	61.6225	54.6713	50.6769	57.9882	51.3264	41.7248	3	1	0	1.51826	3.78203	1.31674	0.57231	0.320001	2.70898	2.03203	-0.414829	1	0	1	0	0	0	0	0	0	0
ASB9	NM_001031739,NM_001168530,NM_001168531,NM_024087	NM_027027	51.6854	51.5464	38.6364	54.5455	52.5424	35.2601	0	0	0	18.2875	11.2391	-0.702336	-0.523889	NA	17.175	11.9484	-0.523488	0	0	0	0	0	0	0	0	0	0
ASCC1	NM_001198798,NM_001198799,NM_001198800,NR_045564	NM_026937,NM_001199187	58.2953	49.113	60	58.209	43.9479	43.5484	1	0	0	5.12031	3.8625	-0.406697	0.578111	2.63012	5.24062	6.18047	0.237977	0	0	0	0	0	0	0	1	0	0
ASCC2	NM_001242906,NM_032204	NM_029291	58.0645	53.3778	56.3518	71.5278	55.4529	58.5185	2	1	0	11.0094	18.8531	0.776071	0.296397	11.5388	10.4375	13.7875	0.401585	0	0	0	0	0	0	0	0	0	0
ASCC3	NM_006828,NM_022091	NM_198007	69.0037	42.0343	35.3038	61.7021	40.4146	32.4159	0	0	0	10.5375	7.03125	-0.58368	-0.327233	2.19345	15.3187	24	0.647736	0	0	0	0	0	0	0	0	0	0
ASF1A	NM_014034	NM_025541	58.0786	43.5772	33.009	55.7864	41.1382	30.1414	0	0	1	3.67969	0.412305	-3.1578	-2.12747	1.00909	12.9875	24	0.885911	0	0	0	0	0	0	0	0	0	0
ASF1B	NM_018154	NM_024184	62.1118	54.6798	45.9743	72.093	59.1133	52.1053	0	0	0	5.1375	4.325	-0.248366	1.52096	2.64115	5.0875	5.2	0.0315547	0	0	0	0	0	0	0	0	0	0
ASH1L	NM_018489	NM_138679	37	45.4208	41.5103	62.5	44.0135	38.6411	0	0	3	3.62461	2.42031	-0.582632	0.247031	4.0556	4.13594	4.29766	0.0553354	0	0	0	0	0	0	0	0	0	0
ASH2L	NM_001105214,NM_001261832,NM_004674,NR_049736	NM_011791	63.6364	50.2671	46.4463	62.069	49.5495	43.6075	0	0	0	5.69688	6.175	0.116268	1.37335	2.71893	6.21563	5.48125	-0.181395	0	0	0	0	0	0	0	0	0	0
ASIC1	NM_001095,NM_001256830,NM_020039,NR_046389	NM_009597	78.7565	55.5977	55.455	79.7297	57.5929	54.7897	1	1	1	12.6562	12.15	-0.0588937	1.53401	2.37233	3.55625	10.3359	1.53924	0	0	0	0	0	0	0	0	0	0
ASL	NM_000048,NM_001024943,NM_001024944,NM_001024946	NA	NA	NA	NA	70.2703	60.8602	54.6512	0	0	0	24	21.575	-0.153674	0.847109	2.17641	24	24	0	1	0	1	0	0	0	0	0	0	0
ASNA1	NM_004317	NM_019652	69.2308	55.3964	59.4737	50	57.7841	60.7306	0	0	0	18.1656	10.0219	-0.858058	-0.730853	2.14863	19.525	9.34062	-1.06373	0	0	0	0	0	0	0	0	0	0
ASNS	NM_001178075,NM_001178076,NM_001178077,NM_001673,NM_133436,NM_183356	NM_012055	63.3136	47.8055	41.7808	60.1594	43.1198	39.4366	0	0	0	24	10.9328	-1.13437	-0.96207	0.341531	24	24	0	0	0	0	0	0	0	0	0	0	0
ASNSD1	NM_019048	NM_133728	51.9101	42.8875	34.5133	46.0829	38.9752	20.9524	0	0	0	4.33828	3.57812	-0.27792	-1.69032	0.548001	3.90117	7.05	0.853716	0	0	0	0	0	0	0	0	0	0
ASPH	NM_001164750,NM_001164751,NM_001164752,NM_001164753,NM_001164754,NM_001164755,NM_001164756,NM_004318,NM_020164,NM_032466,NM_032467,NM_032468	NM_023066	70.2381	51.168	39.6822	76.2082	46.603	33.0472	0	0	3	21.1969	15.1656	-0.483046	-0.516443	4.56682	23.8969	24	0.00621214	0	0	0	0	0	0	0	1	0	0
ASPHD1	NM_181718	NM_001039645	67.3684	58.1818	59.1398	56.8493	66.7519	57.8616	0	0	0	8.09531	10.1906	0.332084	-1.8444	NA	24	24	0	0	0	0	0	0	0	0	0	0	0
ASPM	NM_001206846,NM_018136	NM_009791	59.1195	44.6579	27.2189	54.0856	37.806	24.3655	0	0	0	4.11016	2.83516	-0.535765	-1.98071	0.822973	5.10234	7.64375	0.58312	0	0	0	0	0	0	0	0	0	0
ASPSCR1	NM_001251888,NM_024083,NR_045351	NM_026877	64.9351	59.5886	58.8889	72.1649	65.4031	60.7143	0	0	0	8.92188	5.9625	-0.58143	0.0900064	NA	6.33437	4.85703	-0.383128	0	0	0	0	0	0	0	0	0	0
ASRGL1	NM_001083926,NM_025080	NM_025610	64.6341	53.7207	45.4023	71.831	53.8296	48.1874	0	0	0	16.3531	15.9563	-0.0354452	1.07324	NA	24	24	0	1	0	1	0	0	0	0	0	0	0
ASS1	NM_000050,NM_054012	NM_007494	64.3564	53.8337	51.3725	78.9116	56.0936	51.7787	0	0	0	24	24	0	-0.422308	NA	24	24	0	0	0	0	0	0	0	0	0	0	0
ASTN2	NM_001184734,NM_001184735,NM_014010,NM_198186,NM_198187,NM_198188	NM_207109	72.51	55.6541	49.6148	62.2881	53.6752	33.5565	0	0	0	3.36953	2.82773	-0.252901	1.7181	0.587857	2.55117	1.56094	-0.708747	0	0	0	0	0	0	0	1	0	0
ASUN	NM_018164	NM_138757	61.5385	46.0209	30.5732	61.0801	39.8868	26.7296	0	0	0	9.59219	13.0188	0.440659	-2.21818	1.72222	22.75	24	0.0771679	0	0	0	0	0	0	0	0	0	0
ASXL1	NM_001164603,NM_015338	NM_001039939	76.4826	52.0132	44.726	79.3981	53.8046	46.8955	2	0	0	1.94063	3.18438	0.714489	0.521637	4.43195	2.43281	1.94004	-0.32654	0	0	0	0	0	0	0	0	0	0
ASXL2	NM_018263	NM_172421,NM_001270988	67.451	47.8969	37.234	70.5882	49.8143	39.5085	1	0	1	1.48496	3.03437	1.03097	-0.819784	NA	3.03203	2.54219	-0.254214	0	0	0	0	0	0	0	0	0	0
ATAD1	NM_032810	NM_026487	56.5217	42.2652	35.3956	61.2137	41.1602	31.9949	0	0	2	6.8375	4.24023	-0.689325	-0.513393	0.790479	7.39687	13.9313	0.913337	0	0	0	0	0	0	0	0	0	0
ATAD2	NM_014109	NM_027435	66.6667	43.7118	33.5135	67.5926	41.3372	29.4622	0	0	1	5.00781	3.88672	-0.365628	-1.52377	2.34359	6.13281	11.2188	0.871291	0	0	0	0	0	0	0	0	0	0
ATAD3A	NM_001170535,NM_001170536,NM_018188	NA	NA	NA	NA	69.9482	62.7297	66.3415	1	0	0	11.0031	16.3531	0.571653	2.49932	9.5125	8.63281	7.69688	-0.165558	0	0	0	0	0	0	0	0	0	0
ATAD3B	NM_031921	NA	NA	NA	NA	81.1881	64.2013	65.4545	1	1	0	9.53438	12.8594	0.431611	1.62089	8.75615	5.16719	6.94062	0.425686	0	0	0	0	0	0	0	0	0	0
ATE1	NM_001001976,NM_007041	NM_013799	78.2051	45.9059	43.4037	82.9268	45.729	33.8596	0	0	0	7.10625	3.91836	-0.858839	-0.49101	NA	5.98438	6.46875	0.112286	0	0	0	0	0	0	0	0	0	0
ATF1	NM_005171	NM_007497	76.2963	50.1235	35.4864	64.6104	44.2402	27.5887	0	0	0	2.02148	2.275	0.170452	-1.77437	NA	4.48594	7.29141	0.700787	0	0	0	0	0	0	0	0	0	0
ATF2	NM_001256090,NM_001256091,NM_001256092,NM_001256093,NM_001256094,NM_001880,NR_045768,NR_045769,NR_045770,NR_045771,NR_045772,NR_045773,NR_045774	NM_001025093	49.2492	47.6093	35.0601	46.2766	46.2798	29.7584	0	0	1	5.61953	3.29297	-0.771061	-1.18062	NA	4.59141	5.16563	0.170007	0	0	0	0	0	0	0	0	0	0
ATF3	NM_001030287,NM_001040619,NM_001206484,NM_001206486,NM_001206488,NM_001674	NM_007498	67.0635	50.7326	49.747	46.1039	51.0989	46.6448	0	0	0	0.941791	4.05156	2.105	2.28171	7.59673	2.70508	5.35469	0.985132	0	0	0	0	0	0	0	0	0	0
ATF4	NM_001675,NM_182810	NM_001287180,NM_009716	60.9428	51.619	36.25	59.6429	52.5568	39.2857	0	0	1	4.40781	5.67344	0.36416	1.12893	5.51873	2.49297	6.4	1.36021	0	0	0	0	0	0	0	0	0	0
ATF5	NM_001193646,NM_012068	NM_030693	51.1945	65.2582	52.7119	65.5172	65.4888	52.0142	0	0	0	2.05254	15.8094	2.9453	1.3691	NA	2.24883	4.88906	1.12038	1	0	1	0	0	0	0	0	0	0
ATF6	NM_007348	NM_001081304	61.4286	49.0614	44.5917	50.4274	44.9578	39.808	2	0	0	16.3938	6.64531	-1.30274	-0.804047	NA	16.4312	23.4812	0.515067	1	0	1	0	0	0	0	0	0	0
ATF6B	NM_001136153,NM_004381	NM_017406	73.5294	61.7162	50.1326	66.6667	59.534	48.1953	0	0	0	24	12.4719	-0.944355	0.429844	2.10071	23.5625	16.475	-0.516214	0	0	0	0	0	0	0	0	0	0
ATF7	NM_001130060,NM_001206682,NM_001206683,NM_006856,NR_073163	NM_146065	63.7168	51.6908	36.7493	61.3924	44.3503	33.8028	0	0	0	7.01328	5.02734	-0.480293	-1.04127	NA	10.9	24	1.13871	0	0	0	0	0	0	0	0	0	0
ATF7IP	NM_018179	NM_019426	66.8639	51.0329	43.7636	65.8228	44.2434	34.2029	0	0	0	3.58008	1.30723	-1.45348	-1.61874	NA	3.45312	3.45859	0.00228311	0	0	0	0	0	0	0	0	0	0
ATG12	NM_004707,NR_033362,NR_033363,NR_073603,NR_073604,NR_073605	NM_026217	63.6364	52.3474	42.5971	57.1906	48.227	34.5717	1	0	1	4.89687	5.3	0.114131	0.546786	NA	5.47656	13.6813	1.32086	1	1	1	1	0	0	1	0	0	0
ATG13	NM_001142673,NM_001205119,NM_001205120,NM_001205121,NM_001205122,NM_014741	NM_145528	61.8076	50	53.3937	56.4327	48.9951	53.2556	8	6	0	7.91875	6.86094	-0.206867	2.36971	3.53428	5.46172	5.10469	-0.0975323	0	0	0	0	0	0	0	0	0	0
ATG14	NM_014924	NM_172599	57.1429	53.0088	46.6804	55.5556	50.3043	41.8216	0	0	1	1.6502	3.21016	0.960007	0.612491	NA	2.13828	2.2875	0.0973203	1	1	1	1	0	0	0	0	0	0
ATG16L1	NM_001190266,NM_001190267,NM_017974,NM_030803,NM_198890	NM_029846	68.4492	51.2061	52.1001	66.9261	50.2547	48.1873	1	0	1	1.51494	1.85547	0.292522	1.44131	2.37895	1.79512	1.88867	0.0732943	0	0	0	0	0	0	0	0	0	0
ATG2A	NM_015104	NM_194348	76.5625	59.7041	58.6345	78.2609	63.7442	63.9456	1	1	0	5.72187	8.16719	0.513351	2.39141	2.18181	4.49375	4.49375	0	0	0	0	0	0	0	0	0	0	0
ATG3	NM_022488	NM_026402	71.1111	43.1746	36.261	69.0909	41.7989	28.3422	0	0	0	14.425	9.60313	-0.586995	-3.0455	1.88	24	24	0	0	0	0	0	0	0	0	0	0	0
ATG4A	NM_052936,NM_178270	NM_174875	54.5455	44.9202	38.0753	59.4937	43.1078	39.7289	1	0	0	4.85625	2.53477	-0.93799	-0.139254	NA	7.50938	5.69844	-0.398126	0	0	0	0	0	0	0	0	0	0
ATG4B	NM_013325,NM_178326	NM_174874	75	51.8613	49.2108	77.6699	55.9222	60.3643	3	2	0	7.82969	6.35781	-0.300424	1.77403	11.5142	4.40703	5.41016	0.295863	0	0	0	0	0	0	0	0	0	0
ATG4D	NM_032885	NM_153583	70.6522	59.8596	54.2918	81.6667	64.6316	58.4046	0	0	0	10.1766	10.8031	0.0861994	1.74183	8.89456	4.99531	3.98828	-0.324808	0	0	0	0	0	0	0	0	0	0
ATG5	NM_004849	NM_053069	64.2105	44.5652	40.113	63.1728	39.0097	34.9491	0	0	0	4.35156	3.10195	-0.488357	0.534757	NA	6.36875	5.09687	-0.321397	0	0	0	0	0	0	0	0	0	0
ATG7	NM_001136031,NM_001144912,NM_006395	NM_001253717	53.75	53.6837	52.0453	67.5214	48.6269	52.3742	2	0	0	8.46094	7.49844	-0.174228	0.691891	NA	5.11641	8.3375	0.704484	0	0	0	0	0	0	0	0	0	0
ATG9A	NM_001077198,NM_024085	NM_001003917	61.413	57.8968	56.0377	72.3881	57.8175	59.7938	0	0	0	18.3656	16.9187	-0.118385	2.14827	16.9187	10.3781	12.0375	0.213989	0	0	0	0	0	0	0	0	0	0
ATHL1	NM_025092	NM_145387	67.0455	56.8741	53.1707	78.2609	63.505	61.5548	1	0	0	4.46563	5.24062	0.230877	0.5222	NA	2.45332	4.66328	0.92661	0	0	0	0	0	0	0	0	0	0
ATIC	NM_004044	NM_026195	70.7547	51.0961	46.1458	71.123	46.9927	33.8983	0	0	0	24	23.1	-0.0551416	-0.00919837	0.813793	22.3188	24	0.104778	0	0	0	0	0	0	0	0	0	0
ATL2	NM_001135673,NM_022374,NR_024191	NM_019717	50	46.1758	36.7289	36.6667	41.9521	33.243	0	0	2	3.80469	1.85996	-1.03251	-0.571723	NA	4.0125	4.76719	0.248637	0	0	0	0	0	0	0	0	0	0
ATL3	NM_015459	NM_146091	64.6067	44.7109	40.1356	71.3768	45.449	40.9605	0	0	0	6.78594	5.45	-0.316292	-1.02142	NA	5.74297	6.15937	0.100987	0	0	0	0	0	0	0	0	0	0
ATMIN	NM_015251	NM_177700	79.4118	55.9626	47.8625	88.8889	49.2314	38.468	0	0	1	3.26484	3.41602	0.0653007	-1.0729	0.426725	4.12188	4.59375	0.156372	1	0	1	0	0	0	0	0	0	0
ATN1	NM_001007026,NM_001940	NM_007881	71.8833	62.1315	54.1667	59.5652	63.2802	57.3013	0	0	0	8.55625	6.38594	-0.42208	0.0627334	4.81834	4.78594	5.69688	0.251369	0	0	0	0	0	0	0	0	0	0
ATOX1	NM_004045	NM_009720	69.1781	55.0725	56.383	72.449	49.7585	57.6087	1	0	0	24	24	0	-2.26643	2.75756	24	24	0	0	0	0	0	0	0	0	0	0	0
ATP10D	NM_020453	NA	NA	NA	NA	50.6098	45.737	33.8242	1	0	3	12.1531	6.96094	-0.803974	0.162598	NA	8.52031	8.66719	0.0246576	0	0	0	0	0	0	0	0	0	0
ATP11A	NM_015205,NM_032189	NM_015804	83.557	52.2727	48.8411	81.8182	52.377	49.5298	1	0	1	6.2	7.60625	0.294917	0.929005	2.70033	4.48125	5.11562	0.191009	0	0	0	0	0	0	0	0	0	0
ATP11C	NM_001010986,NM_173694	NA	NA	NA	NA	42.4242	39.494	32.2631	0	0	0	16.675	9.75	-0.774213	-0.386384	0.343298	24	NA	NA	0	0	0	0	0	0	0	0	0	0
ATP13A1	NM_020410	NM_133224	61.9565	58.3403	56.3636	67.8571	62.4896	62.8959	0	0	0	6.25	24	1.94111	0.769983	4.18573	6.65937	11.3	0.762864	0	0	0	0	0	0	0	0	0	0
ATP13A2	NM_001141973,NM_001141974,NM_022089	NM_029097	78.3505	62.0513	55.1587	83.1579	63.4208	61.9772	1	1	0	24	24	0	1.32103	3.28677	24	10.9437	-1.13293	0	0	0	0	0	0	0	0	0	0
ATP13A3	NM_024524	NM_001128094	69.5341	41.5574	34.776	31.8408	40.3151	31.8336	0	0	2	12.6906	4.58594	-1.46847	-0.0663628	1.30323	7.53437	9.11875	0.275348	0	0	0	0	0	0	0	0	0	0
ATP1A1	NM_000701,NM_001160233,NM_001160234	NM_144900	76.1905	53.125	50.4451	35.8491	49.7147	48.4848	1	0	0	24	24	0	0.905331	0.899453	24	24	0	0	0	0	0	0	0	0	0	0	0
ATP1B1	NM_001677	NM_009721	74.0964	50.6011	38.132	77.686	46.1623	34.4473	1	1	1	8.65625	3.76758	-1.2001	-0.684919	NA	7.49531	9.00781	0.265188	0	0	0	0	0	0	0	0	0	0
ATP1B3	NM_001679	NM_007502	77.4306	44.325	41.1968	77.0115	42.381	34.6841	0	0	2	24	13.1937	-0.86318	-0.621445	0.5125	24	24	0	0	0	0	0	0	0	0	0	0	0
ATP2A2	NM_001681,NM_170665	NM_009722	79.6296	49.4161	40.9266	78.508	48.4302	36.8488	0	0	1	13.2375	6.19062	-1.09647	0.799201	1.63278	7.66563	7.35	-0.0606592	0	0	0	0	0	0	0	0	0	0
ATP2B1	NM_001001323,NM_001682	NM_026482	54.4018	45.8094	37.037	31.4917	40.0764	32.9813	0	0	3	7.84531	3.76953	-1.05745	-0.0700711	0.111551	6.33203	8.55312	0.433783	1	0	0	0	1	0	0	0	0	0
ATP2B4	NM_001001396,NM_001684	NM_213616	45.9227	51.5202	45.6311	54.4036	50.8845	41.6134	1	1	1	7.19688	6.42188	-0.164376	0.403029	NA	6.64844	9.68281	0.542411	0	0	0	0	0	0	0	0	0	0
ATP2C1	NM_001001485,NM_001001486,NM_001001487,NM_001199179,NM_001199180,NM_001199181,NM_001199182,NM_001199183,NM_001199184,NM_001199185,NM_014382	NM_001253831	57.2727	44.666	33.7854	60.5556	42.2807	34.6983	0	0	0	18.4969	9.50625	-0.960334	-0.481591	1.52327	9.65625	22.075	1.19288	0	0	0	0	0	0	0	0	0	0
ATP5A1	NM_001001935,NM_001001937,NM_001257334,NM_001257335,NM_004046	NM_007505	49.3789	52.9483	43.1211	62.2951	47.7738	32.6087	0	0	0	24	24	0	-1.16655	0.633378	24	24	0	0	0	0	0	0	0	0	0	0	0
ATP5B	NM_001686	NM_016774	72.2222	53.1447	38.6029	64.7619	51.2579	41.2162	0	0	0	24	24	0	-0.758753	0.714816	24	24	0	0	0	0	0	0	0	0	0	0	0
ATP5C1	NM_001001973,NM_005174	NM_020615	71.028	47.2687	35.8025	73.0769	43.8127	31.5789	0	0	0	24	18.0156	-0.413785	-3.20264	1.56367	24	24	0	0	0	0	0	0	0	0	0	0	0
ATP5D	NM_001001975,NM_001687	NM_025313	65.5629	61.7357	57.5092	79.2079	68.0473	65.2174	0	0	0	24	24	0	-0.173667	6.90012	24	24	0	0	0	0	0	0	0	0	0	0	0
ATP5E	NM_006886	NM_025983	67.8899	51.5723	48.366	66.3793	44.2308	35.3293	0	0	0	24	20.8594	-0.202338	-4.53909	6.85175	24	24	0	0	0	0	0	0	0	0	0	0	0
ATP5F1	NM_001688	NM_009725	59.8165	47.0817	34.375	56.2945	46.1738	39.824	0	0	0	24	20.1938	-0.249126	-1.32671	0.0861903	24	24	0	1	0	1	0	0	0	0	0	0	0
ATP5G1	NM_001002027,NM_005175	NA	NA	NA	NA	57.8125	54.2579	51.4851	0	0	0	24	20.3938	-0.234907	-3.9677	1.71374	24	24	0	0	0	0	0	0	0	0	0	0	0
ATP5G2	NM_001002031,NM_005176	NA	NA	NA	NA	64.6617	56.6164	50	1	1	0	24	24	0	-2.94271	0.558705	24	24	0	0	0	0	0	0	0	0	0	0	0
ATP5G3	NM_001002258,NM_001190329,NM_001689	NA	NA	NA	NA	66.1111	48.7179	34.532	0	0	1	24	24	0	-2.2047	0.174999	24	24	0	0	0	0	0	0	0	1	0	0	0
ATP5H	NM_001003785,NM_006356	NM_027862	58.75	49.177	50.8475	60.9375	44.6502	34.7222	0	0	0	24	16.4406	-0.545769	-4.73001	2.6108	24	24	0	0	0	0	0	0	0	0	0	0	0
ATP5I	NM_007100,NR_033743	NM_007507	58.6207	53.7037	48.5294	62.6374	53.8095	51.5625	0	0	0	24	24	0	-4.49393	8.80049	24	24	0	0	0	0	0	0	0	0	0	0	0
ATP5J	NM_001003696,NM_001003697,NM_001003701,NM_001003703,NM_001685	NM_001302214,NM_016755	72.9114	43.4251	26.4368	74.8571	42.8135	28.125	0	0	0	24	13.1062	-0.872779	-3.58803	0.275451	24	24	0	0	0	0	0	0	0	0	0	0	0
ATP5J2	NM_001003713,NM_001003714,NM_001039178,NM_004889	NM_020582	48.2633	52.4345	52.4823	66.6667	50.1873	52.4096	0	0	0	23.5	24	0.0303736	-4.03836	0.425896	24	24	0	0	0	0	0	0	0	0	0	0	0
ATP5L	NM_006476,NR_033759	NM_013795	67.9012	48.3974	35.5932	52.3466	49.6795	32.7103	0	0	0	24	19.1375	-0.326632	-1.91721	0.163474	24	24	0	0	0	0	0	0	0	0	0	0	0
ATP5O	NM_001697	NM_138597	61.3636	52.8037	48.4375	63.7363	46.8847	35.6164	0	0	0	24	24	0	-3.94647	0.424999	24	24	0	0	0	0	0	0	0	0	0	0	0
ATP5SL	NM_001167867,NM_001167868,NM_001167869,NM_001167870,NM_001167871,NM_018035,NR_030765	NM_025504	50.0522	57.1059	54.4207	53.8462	59.4315	53.4502	1	1	0	8.775	10.7375	0.291187	2.40296	NA	6.62656	5.59453	-0.244244	0	0	0	0	0	0	0	0	1	0
ATP6AP1	NM_001183	NM_018794	64.6341	53.0172	46.1538	68.8525	59.6603	53.92	1	0	1	24	24	0	0.0649695	0.939999	24	24	0	0	0	0	0	0	0	0	0	0	0
ATP6AP2	NM_005765	NM_027439	65.2632	46.3438	33.2483	77.451	44.8243	30.9875	0	0	1	24	24	0	-2.02327	NA	24	24	0	0	0	0	0	0	0	0	0	0	0
ATP6V0A1	NM_001130020,NM_001130021,NM_005177	NM_001243049,NM_016920	65.5367	50.3774	57.9909	64.0719	46.875	58.0535	1	0	0	24	24	0	1.67122	2.34869	11.5406	9.82188	-0.232652	0	0	0	0	0	0	0	0	0	0
ATP6V0A2	NM_012463	NM_011596	78.5047	53.0144	41.0557	79.8387	47.569	38.4471	0	0	0	9.61562	7.65937	-0.328154	0.222608	NA	8.32031	9.94844	0.257832	0	1	0	1	0	0	0	0	0	0
ATP6V0B	NM_001039457,NM_004047	NM_033617	76.3441	53.0744	55.3633	75.6757	56.7961	55.9727	1	0	0	24	24	0	1.14223	0.333042	16.5656	10.2656	-0.690371	0	0	0	0	0	0	0	0	0	0
ATP6V0C	NM_001198569,NM_001694	NM_009729	65.5367	56.8376	52.2305	74.6667	63.4615	58.9958	0	0	0	24	24	0	0.359615	0.276807	24	24	0	0	0	0	0	0	0	0	0	0	0
ATP6V0D1	NM_004691	NM_013477	75.5556	51.8939	50.2283	71	55.4924	59.3385	4	3	0	21.8719	10.0188	-1.12637	0.468143	NA	18.075	11.5031	-0.651969	0	0	0	0	0	0	0	0	0	0
ATP6V0E1	NM_003945	NM_025272	67.0886	50	47.1215	67.3267	48.7805	43.3645	0	0	0	7.05312	5.05312	-0.481087	0.81268	NA	9.69063	24	1.30837	0	0	0	0	0	0	0	0	0	0
ATP6V0E2	NM_001100592,NM_145230	NM_133764	62.6374	56.5041	51.9231	63.5121	67.9389	59.7252	2	1	0	10.4406	24	1.20083	2.98282	1.29957	8.13438	11.7875	0.535154	0	0	0	0	0	0	0	0	0	0
ATP6V1A	NM_001690	NM_007508	50.838	50.5394	37.9822	62.963	45.1996	36.412	1	1	0	24	7.64062	-1.65127	-0.196096	0.716281	24	24	0	0	1	0	1	0	0	0	0	0	0
ATP6V1B2	NM_001693	NM_007509	76.1905	50.3255	47.1979	75.2336	48.0469	42.0402	0	0	1	7.41719	4.33906	-0.773489	1.11451	NA	5.69219	5.47813	-0.0553011	0	0	0	0	0	0	0	0	0	0
ATP6V1C1	NM_001695	NM_025494	66.0377	44.3864	41.8478	58.3673	39.4256	39.3039	1	0	1	9.09375	4.21641	-1.10886	-0.595043	0.395509	10.1609	16.0031	0.65532	1	1	0	1	1	0	0	1	0	0
ATP6V1D	NM_015994	NM_023721	64.2458	45.8333	40.625	61.6393	42.0699	38.7054	0	0	0	10.7094	6.75469	-0.664914	-0.946748	NA	22.1438	24	0.116135	0	0	0	0	0	0	0	0	0	0
ATP6V1E1	NM_001039366,NM_001039367,NM_001696	NM_007510	61.5385	46.4023	50.3282	54.0107	44.0529	47.2998	0	0	0	8.45781	5.75625	-0.555155	-0.231329	6.8314	10.575	14.5219	0.457571	0	0	0	0	0	0	0	0	0	0
ATP6V1F	NM_001198909,NM_004231	NM_025381	70.7071	54.4444	50.4098	69.6078	57.7778	50.9225	0	0	0	24	11.1719	-1.10316	-3.07	0.2	24	24	0	0	0	0	0	0	0	0	0	0	0
ATP6V1G1	NM_004888	NM_024173	64.3836	57.423	39.2405	65.6	53.5014	34.9867	2	1	0	5.71406	3.94141	-0.535807	-2.89102	0.0733333	16.5063	24	0.540022	0	0	0	0	0	0	0	0	0	0
ATP6V1H	NM_015941,NM_213619,NM_213620	NM_133826	62.6609	43.6639	30.4945	63.2588	44.2149	34.9169	0	0	0	7.17969	3.84609	-0.900527	-0.567444	NA	7.27187	8.0375	0.144419	0	0	0	0	0	0	0	0	0	0
ATP8B2	NM_001005855,NM_020452	NM_001081182	73.9691	53.8483	55.5921	0	54.2484	49.9543	3	0	0	7.0625	9.6375	0.44848	1.47933	3.74333	5.4875	5.55156	0.016745	0	1	0	1	0	0	0	0	0	0
ATP8B3	NM_001178002,NM_138813,NR_047593	NM_026094	73.1092	54.4661	56.338	64.8536	59.3646	54.9843	3	1	0	12.9281	21.8	0.753815	0.38994	NA	7.0125	7.00781	-0.000964588	0	0	0	0	0	0	0	0	0	0
ATP9A	NM_006045	NM_015731	92.1569	56.9656	60.1796	0	55.4389	44.8151	3	1	1	8.59375	7.55938	-0.185021	1.07216	NA	6.825	8.62187	0.337173	0	0	0	0	0	0	0	0	0	0
ATPAF1	NM_001042546,NM_001243728,NM_001256418,NM_022745	NM_181040	70.9091	54.7278	41.5027	86.1111	54.7348	41.791	0	0	0	24	11.6469	-1.04309	0.515006	NA	24	24	0	0	0	0	0	0	0	0	0	0	0
ATPAF2	NM_145691	NM_145427	58.8652	55.5184	48.129	64.0523	57.7011	51.7958	2	0	0	7.68125	7.36719	-0.060227	1.30462	0.58889	7.96094	6.47344	-0.298406	0	0	0	0	0	0	0	0	0	0
ATPIF1	NM_016311,NM_178190,NM_178191	NM_007512	62.6374	52.0249	48.0315	62.3656	53.5826	40.1575	0	0	0	8.60313	13.5312	0.653362	-4.58908	0.838136	24	24	0	0	0	0	0	0	0	0	0	0	0
ATR	NM_001184	NM_019864	71.0938	41.0926	10	68.0328	39.9874	23.7113	0	0	0	8.26094	5.95234	-0.472848	0.0873373	4.87259	6.825	10.3172	0.596149	0	0	0	0	0	0	0	0	0	0
ATRAID	NM_001170795,NM_016085,NM_080592	NM_027855,NM_212470	55.2632	51.7857	47.3684	55.5556	51.8841	41.3043	0	0	0	24	15.475	-0.633095	0.241578	0.0936708	24	24	0	0	0	0	0	0	0	0	0	0	0
ATRIP	NM_001271022,NM_001271023,NM_032166,NM_130384	NM_172774	66.6667	52.4597	56.383	48.2085	53.7343	55.4455	0	0	0	3.70625	3.94062	0.0884643	0.22905	2.56456	2.70195	2.65625	-0.0246116	0	0	0	0	0	0	0	0	0	0
ATRN	NM_001207047,NM_139321,NM_139322	NM_009730	71.2121	51.038	46.0155	74.4444	49.9767	44.5146	6	1	5	19.575	24	0.294022	0.253567	0.805241	8.61719	9.06563	0.0731893	0	0	0	0	0	0	0	0	0	0
ATXN10	NM_001167621,NM_013236	NM_016843	65.4762	48.4594	44.1402	72.5564	46.2885	38.7531	1	0	0	20.5312	10.3234	-0.991898	-1.12576	0.504761	24	15.65	-0.616872	0	0	0	0	0	0	0	0	0	0
ATXN1L	NM_001137675	NM_001080930	64.9425	56.1047	46.754	65.529	57.1014	47.5285	5	5	1	1.80352	1.45801	-0.306814	1.0762	NA	1.78672	1.77012	-0.013468	1	0	0	0	1	0	0	0	0	0
ATXN2	NM_002973	NM_009125	85.1852	57.0837	37.5643	72.8395	54.1096	33.9465	0	0	1	1.08135	9.95312	3.20232	-0.521171	2.58947	7.4875	9.57188	0.354317	0	0	0	0	0	0	0	0	0	0
ATXN2L	NM_007245,NM_017492,NM_145714,NM_148414,NM_148415,NM_148416	NM_183020	72.6531	58.0952	49.345	76.4151	60.347	57.4074	1	0	0	9.63906	7.93281	-0.28106	0.967222	1.95964	5.64062	4.63359	-0.283723	0	0	0	0	0	0	0	0	0	0
ATXN7L1	NM_020725,NM_138495,NM_152749	NM_001033436	41.2214	54.5495	42.9245	48.1481	52.3589	41.5854	0	0	2	3.17969	4.33594	0.447459	0.138835	NA	2.14609	3.675	0.776031	1	0	0	0	1	0	1	0	0	0
ATXN7L2	NM_153340	NM_175183	60.5392	59.4452	44.5255	86.6667	61.8718	43.4343	0	0	0	2.18184	4.7875	1.13373	0.161243	NA	1.31982	1.49082	0.175761	0	0	0	0	0	0	0	0	0	0
ATXN7L3	NM_001098833,NM_020218	NM_001098837	78.8927	50.1916	57.5796	60.4396	51.8199	58.5842	2	2	1	2.96172	3.27656	0.145749	1.80681	6.83217	1.84199	2.15625	0.227258	0	0	0	0	0	0	0	0	0	0
ATXN7L3B	NM_001136262	NM_001033474	70.696	59.5238	43.1811	65.4971	53.7415	45.371	2	2	1	2.34941	2.2457	-0.0651338	0.394877	0.661538	2.33184	2.0707	-0.171346	0	0	0	0	0	0	0	0	0	0
AUH	NM_001698	NM_016709	50	54.709	41.6901	65.7143	52.451	29.6435	1	0	0	8.18594	4.91016	-0.737379	-1.5641	NA	6.54844	9.52656	0.540805	0	0	0	0	0	0	0	0	0	0
AUP1	NM_181575	NM_007517	76.7442	59.2424	57.5342	71.1009	57.5831	54.6053	0	0	0	24	24	0	-1.14195	1.11145	24	23.1969	-0.0491036	0	0	0	0	0	0	0	0	0	0
AURKA	NM_003600,NM_198433,NM_198434,NM_198435,NM_198436,NM_198437	NM_011497	60.7843	52.0734	49.1667	58.4806	44.1419	44.0832	0	0	0	3.27422	2.04082	-0.682002	-0.217672	1.43573	4.11016	5.72656	0.478476	0	0	0	0	0	0	0	0	0	0
AURKAIP1	NM_001127229,NM_001127230,NM_017900	NM_025338	61.0048	55.5556	44.9275	74.6479	65.1667	57.1429	0	0	0	15.2562	13.6312	-0.162483	-1.7965	3.55128	24	24	0	0	0	0	0	0	0	0	0	0	0
AURKB	NM_001256834,NM_004217	NM_011496	66.343	55.4913	40.2985	64.5349	55.9211	42.8571	0	0	0	4.95547	4.27656	-0.21257	-1.26464	3.77604	4.00859	3.02617	-0.405602	0	0	0	0	0	0	0	0	0	0
AVEN	NM_020371	NM_028844	77.7778	56.9485	44.224	82.1429	55.831	43.2642	0	0	0	10.9	5.54063	-0.976208	-0.0156981	NA	9.12969	7.14531	-0.353568	0	0	0	0	0	0	0	0	0	0
AVL9	NM_015060	NM_030235	74.8718	46.8718	39.3899	71.2329	45.9168	46.9231	0	0	0	4.49766	4.775	0.0863274	0.120853	NA	3.41172	3.01211	-0.179725	0	0	0	0	0	0	0	0	0	0
AVPI1	NM_021732	NM_027106	62.8141	62.704	48.3173	65.6064	63.2883	49.2135	2	1	0	1.37778	14.075	3.35271	0.510092	NA	2.40313	3.53594	0.557181	0	0	0	0	0	0	0	0	0	0
AXIN1	NM_003502,NM_181050	NM_009733	75.2381	54.6989	52.6667	77.3779	61.8702	59.5308	0	0	1	3.85664	2.85625	-0.433223	2.00761	9.44931	2.86094	2.59609	-0.140146	0	0	0	0	0	0	0	0	0	0
AXL	NM_001699,NM_021913	NM_001190975,NM_009465	66.5072	57.9303	45.1404	71.5789	60.298	42.9108	0	0	0	24	24	0	1.12139	NA	14.6125	13.5312	-0.110908	1	1	0	1	1	0	0	0	0	0
AZI1	NM_001009811,NM_014984	NM_009734	76.6839	60.8176	56.5854	76.5	65.0632	61.9318	0	0	0	4.86094	3.92813	-0.307394	0.617852	3.10775	3.47266	5.17109	0.57443	0	0	0	0	0	0	0	0	0	0
AZI2	NM_001134432,NM_001134433,NM_001271650,NM_022461	NM_001286508,NM_013727	69.0323	45.3202	34.1506	66.9173	39.485	32.381	0	0	0	6.74844	2.98906	-1.17486	-0.858199	1.85665	10.3781	24	1.20949	0	0	0	0	0	0	0	0	0	0
AZIN1	NM_015878,NM_148174	NM_018745,NM_001102458	53.3078	40.0148	35.7852	53.5235	39.4952	33.0677	0	0	0	6.5375	3.62031	-0.852625	0.347197	0.817979	4.67031	6.95937	0.575439	0	0	0	0	0	0	0	0	0	0
B2M	NM_004048	NM_009735	59.6154	49.4444	32.3661	60	45.5556	33.8624	0	0	0	24	24	0	-1.98343	NA	24	24	0	0	0	0	0	0	0	0	0	0	0
B3GALNT1	NM_001038628,NM_003781,NM_033167,NM_033168,NM_033169	NM_020026	69.112	46.2851	35.5757	51.3126	40.9639	33.1023	1	0	0	8.14375	5.51562	-0.562169	0.231517	NA	6.31797	7.46719	0.241104	0	0	0	0	0	0	0	0	0	0
B3GALNT2	NM_152490	NM_178640	70.9924	49.703	39.8034	78.6026	48.7026	37.8514	0	0	0	10.5156	10.7312	0.0292828	0.0988196	NA	8.74062	9.28125	0.0865827	1	1	0	1	1	0	0	0	0	0
B3GALT6	NM_080605	NM_080445	81.8182	66.8712	43.7644	96.6667	75.3535	57.4492	2	1	0	2.41172	2.30156	-0.0674479	2.42724	8.66816	1.55391	1.69082	0.121824	0	0	0	0	0	0	0	0	0	0
B3GAT3	NM_012200	NM_024256	78.7565	60.4167	56.5	75.4386	63.5913	61.9753	0	0	0	13.0969	21.125	0.689728	1.4453	2.02413	8.42031	7.58125	-0.151438	0	0	0	0	0	0	0	0	0	0
B3GNT1	NM_006876	NM_175383	72.8477	57.8526	44.6541	78.6207	62.4199	45.0517	1	0	1	6.57188	3.83594	-0.776726	1.65947	2.38461	4.61484	3.50937	-0.395068	1	0	0	0	1	0	0	0	0	0
B3GNT9	NM_033309	NA	NA	NA	NA	76.6355	68.2382	51.9149	2	0	0	2.58203	3.16719	0.294696	1.50944	NA	3.49297	3.3293	-0.0692363	0	0	0	0	0	0	0	0	0	0
B3GNTL1	NM_001009905	NM_178664	62.8099	53.7244	50.03	85.7143	59.5764	57.2438	0	0	0	6.70469	9.61562	0.52021	0.485752	NA	6.25	9.3	0.573375	0	0	0	0	0	0	0	0	0	0
B4GALNT1	NM_001276468,NM_001276469,NM_001478	NM_008080,NM_027739	72.8767	58.9263	56.8047	71.1268	63.048	54.5347	0	0	0	7.07188	6.98281	-0.0182844	0.690007	3.0903	4.64766	5.11172	0.137305	0	0	0	0	0	0	0	0	0	0
B4GALNT4	NM_178537	NM_177897	NA	59.1304	NA	100	67.5	58.4615	0	0	0	8.44531	4.57188	-0.885365	1.94171	7.40003	3.66328	4.18125	0.190798	0	0	0	0	0	0	0	0	0	0
B4GALT1	NM_001497	NM_022305	73.5	54.5	47.0383	76.1905	56.2239	46.9605	3	0	1	7.41719	6.34375	-0.225536	1.96573	NA	5.38906	6.74688	0.324185	0	0	0	0	0	0	0	0	0	0
B4GALT2	NM_001005417,NM_003780,NM_030587	NM_001253381,NM_017377	75.625	58.5586	56.3712	61.8421	61.8574	60.4426	3	0	0	11.4437	9.73438	-0.2334	1.86572	14.3246	8.29844	7.50625	-0.144747	1	0	0	0	1	0	0	0	0	0
B4GALT3	NM_001199873,NM_001199874,NM_003779	NM_020579	58.5034	57.7441	52.7132	61.0482	57.868	52.3715	0	0	0	6.57188	6.40625	-0.0368249	0.5212	2.86675	5.27656	4.50625	-0.227671	0	0	0	0	0	0	0	0	0	0
B4GALT4	NM_003778,NM_212543	NM_019804	60.4	51.6908	39.843	51.5513	46.9565	38.4139	0	0	0	5.48594	5.30859	-0.0474085	0.89063	NA	4.37578	5.6	0.355886	0	0	0	0	0	0	0	0	0	0
B4GALT5	NM_004776	NM_019835	84.106	55.0985	51.971	83.5052	49.443	45.5437	0	0	1	1.74277	0.651733	-1.41903	0.971297	NA	1.80879	3.47812	0.943286	0	1	0	1	0	0	0	0	0	0
B4GALT7	NM_007255	NM_146045	73.0769	58.9431	49.3446	84.9462	63.313	56.7692	1	0	0	6.21563	6.97266	0.165809	2.40726	4.3411	4.83437	4.81406	-0.00607436	0	0	0	0	0	0	0	0	0	0
B9D1	NM_001243473,NM_001243475,NM_015681	NM_013717	69.2308	54.6341	48.9051	69.5122	57.7236	55.0336	0	0	0	13.3156	18.625	0.48412	-0.874286	NA	19.5813	24	0.293562	0	0	0	0	0	0	0	0	0	0
B9D2	NM_030578	NM_172148	45.8515	60.7955	55.303	62.7273	64.0152	56.5371	0	0	0	2.59453	14.8438	2.51631	0.0452795	NA	0.223633	1.59756	2.83667	1	0	0	0	1	0	0	0	0	0
BABAM1	NM_001033549,NM_014173	NM_026636	61.1111	57.1856	47.3262	61.8644	57.6768	51.1475	0	0	0	24	24	0	-0.938341	3.27926	24	24	0	0	0	0	0	0	0	0	0	0	0
BACE1	NM_001207048,NM_001207049,NM_012104,NM_138971,NM_138972,NM_138973	NM_011792	67.6339	57.4369	45.346	76.1388	58.3665	43.7371	0	0	1	17.6625	11.4062	-0.630865	1.59869	NA	10.0406	14.4719	0.527403	0	0	0	0	0	0	0	0	0	0
BACE2	NM_012105,NM_138991,NM_138992	NM_019517	79.7297	53.4628	44.9693	79.9136	56.4547	45.7348	3	2	0	24	24	0	0.59554	NA	15.0375	24	0.67447	0	0	0	0	0	0	0	0	0	0
BAD	NM_004322,NM_032989	NM_007522	62.987	62.439	57.2193	75.6098	67.0611	62.9921	1	1	0	8.76875	12.4812	0.509319	2.29348	3.7034	10.6891	4.94219	-1.11291	0	0	0	0	0	0	0	0	0	0
BAG1	NM_001172415	NA	NA	NA	NA	73.6111	48.7734	45.3222	2	1	1	7.87188	10.8969	0.469136	0.568713	3.9525	10	24	1.26303	1	1	1	0	0	1	1	0	0	0
BAG2	NM_004282	NM_145392	80.7692	54.0284	46.0374	73.7245	45.4403	31.25	0	0	0	2.9625	2.10098	-0.495755	-1.70168	NA	2.88711	3.91562	0.439617	0	0	0	0	0	0	0	1	0	0
BAG3	NM_004281	NM_013863	61.9565	59.5156	44.2341	69.281	60.8796	37.3832	0	0	0	0.770825	24	4.96049	0.187296	NA	2.46934	2.17813	-0.181036	0	0	0	0	0	0	0	0	0	0
BAG4	NM_001204878,NM_004874	NM_026121	78.9474	56.2591	38.0095	64.8936	52.0378	31.6595	0	0	0	2.14297	1.72852	-0.310077	-0.174605	0.420479	5.01094	8.65625	0.788661	0	0	0	0	0	0	0	1	0	0
BAG5	NM_001015048,NM_001015049,NM_004873	NM_027404	71.1297	51.8601	37.2302	72.2467	44.7173	39.7925	0	0	0	1.07888	0.871631	-0.307748	-0.656695	NA	2.57363	2.1125	-0.284855	0	1	0	1	0	0	0	0	0	0
BAG6	NM_001098534,NM_001199697,NM_001199698,NM_004639,NM_080702,NM_080703	NM_057171	69.3811	59.4228	46.5116	64.9682	59.8117	45.6311	0	0	0	24	24	0	-0.550539	1.75185	24	24	0	0	0	0	0	0	0	0	0	0	0
BAHD1	NM_014952	NM_001045523	82.4451	62.182	52.863	78.8732	63.2949	53.8352	3	1	0	2.21406	2.36016	0.0921859	3.10206	3.90636	1.66055	1.69658	0.0309726	0	0	0	0	0	0	0	0	0	0
BAIAP2	NM_001144888,NM_006340,NM_017450,NM_017451	NM_130862	71.9907	57.6801	52.1424	71.2963	61.5581	57.5958	3	1	1	5.0875	9.47813	0.897645	2.20936	2.54267	3.15937	3.06719	-0.0427226	0	0	0	0	0	0	0	0	0	0
BAIAP2L1	NM_018842	NM_025833	68.6347	49.9676	45.0035	77.1863	49.0885	50.6681	2	1	1	5.71563	4.46875	-0.35504	0.89253	3.78155	4.70234	4.2875	-0.133243	1	0	1	0	0	0	0	0	0	0
BAK1	NM_001188	NM_007523	58.0189	56.1905	57.0027	63.6667	59.2767	57.2792	1	1	0	4.20625	8.73438	1.05417	3.27584	4.52301	2.06973	1.62178	-0.351865	0	0	0	0	0	0	0	0	0	0
BANF1	NM_001143985,NM_003860	NM_001286608,NM_011793,NM_001038231	66.463	54.8148	50.1348	58.6614	56.2963	49.7326	0	0	0	20.7781	8.13906	-1.35213	0.119229	1.79641	24	24	0	0	0	0	0	0	0	0	0	0	0
BANP	NM_001173539,NM_001173540,NM_001173541,NM_001173542,NM_001173543,NM_017869,NM_079837	NM_016812,NM_001110100	63.2184	56.7092	48.6061	52.4887	60.8974	54.0335	0	0	0	1.49316	5.37188	1.84705	1.98987	2.86411	1.94004	1.57422	-0.301449	0	0	0	0	0	0	0	0	0	0
BAP1	NM_004656	NM_027088	71.4286	54.824	52.5792	78.2609	58.4475	57.3886	2	0	2	7.91875	5.65625	-0.485427	1.86748	5.32309	5.03594	5.03594	0	0	0	0	0	0	0	0	0	0	0
BARD1	NM_000465	NM_007525	64.3068	48.4334	41.6942	67.4074	43.916	30.4	0	0	0	1.2124	2.76484	1.18933	-0.842077	NA	3.53906	5.625	0.668486	0	0	0	0	0	0	0	0	0	0
BARX1	NM_021570	NM_007526	83.1933	65.7516	59.8058	88.3333	68.7582	64.432	3	0	0	14.1125	5.83672	-1.27374	0.778837	5.32628	24	7.4125	-1.695	0	0	0	0	0	0	0	0	0	0
BASP1	NM_001271606,NM_006317	NM_027395	72.5225	74.1557	40.2542	74.1313	69.2982	39.2593	0	0	0	4.78516	3.23359	-0.565427	-1.57913	0.733915	10.1391	15.2	0.584147	0	0	0	0	0	0	0	0	0	0
BATF3	NM_018664	NM_030060	79.8507	60.5042	58.0645	81.6143	61.7188	53.7433	2	0	0	5.85625	5.92656	0.0172185	0.209606	NA	8.47188	24	1.50228	0	0	0	0	0	0	0	0	0	0
BAX	NM_004324,NM_138761,NM_138763,NM_138764,NR_027882	NM_007527	74.7967	59.0674	47.3054	85.5072	60.9672	50.6173	0	0	0	7.06406	4.28672	-0.720624	-1.15313	4.15214	6.87969	5.46875	-0.331132	0	0	0	0	0	0	0	0	0	0
BAZ1A	NM_013448,NM_182648	NM_013815	65.8667	46.2331	33.1565	58.2746	40.805	29.601	0	0	0	4.74688	2.77461	-0.774694	-1.38551	2.96676	4.79063	5.77813	0.270388	0	0	0	0	0	0	0	0	0	0
BAZ1B	NM_032408	NM_011714	72.7979	48.9189	50.6603	76.9886	46.743	44.3936	0	0	0	5.125	4.59844	-0.156408	0.183346	2.02912	4.62109	5.03516	0.123802	0	0	0	0	0	0	0	0	0	0
BAZ2A	NM_013449	NM_054078	67.7419	52.9661	48.3529	55.1546	54.4071	47.9153	1	1	0	5.27187	4.75234	-0.149677	0.575327	0.95	3.71797	4.45	0.259291	0	0	0	0	0	0	0	0	0	0
BBS1	NM_024649	NM_001033128	64	57.688	49.0991	66.6667	58.6981	50.5711	0	0	0	12.1344	24	0.983934	1.05025	2.09092	7.09922	NA	NA	0	0	0	0	0	0	0	1	0	0
BBS2	NM_031885	NM_026116	60.5664	49.3998	41.3043	71.3675	46.3527	31.6425	0	0	0	13.4125	7.11406	-0.914833	-0.517939	1.94	9.23438	10.5625	0.193865	0	0	0	0	0	0	0	0	0	0
BBS4	NM_001252678,NM_033028,NR_045565,NR_045566	NM_175325	68	47.2809	43.6947	67.3469	46.4103	42.1822	1	0	0	8.31094	24	1.52995	1.48074	NA	8.16719	8.70156	0.0914351	0	0	0	0	0	0	0	0	0	0
BBS5	NM_152384	NM_028284	67.1053	42.2027	27.8689	63.7931	37.6218	59.672	0	0	0	1.75185	3.22266	0.879367	0.692239	NA	1.25327	0.760571	-0.720543	0	0	0	0	0	0	0	0	0	0
BBS7	NM_018190,NM_176824	NM_027810	70.8333	43.7151	36.5994	69.5652	40.5151	28.0193	0	0	0	11.6125	5.30156	-1.13119	-2.11698	1.77222	9.79063	24	1.29356	0	0	0	0	0	0	0	0	0	0
BBX	NM_001142568,NM_001276286,NM_020235	NM_027444	56.9079	47.5771	39.86	52.2936	44.1886	36.2057	2	0	2	5.09844	4.17812	-0.2872	-0.149917	1.97011	5.68125	6.71953	0.242152	0	0	0	0	0	0	0	0	0	0
BCAP29	NM_001008405,NM_018844,NR_027830	NM_007530,NM_001164090	66.2603	39.4191	34.413	67.5516	36.9146	37.7271	3	0	1	13.95	6.19688	-1.17065	-0.506004	NA	13.1188	24	0.871404	1	1	0	0	1	1	1	0	1	0
BCAP31	NM_001139441,NM_001139457,NM_001256447,NM_005745	NM_012060	54.902	47.832	45.3826	68.5897	52.2267	57.9775	1	0	0	24	24	0	0.697646	2.4007	24	24	0	0	0	0	0	0	0	0	0	0	0
BCAR1	NM_001170714,NM_001170715,NM_001170716,NM_001170717,NM_001170718,NM_001170719,NM_001170720,NM_001170721,NM_014567	NM_001198839,NM_009954	80.5369	60.5714	50.6297	63.3333	66.3292	60.7069	0	0	1	2.52656	3.84844	0.607097	2.36993	3.53629	1.92148	1.84297	-0.0601892	0	0	0	0	0	0	0	0	0	0
BCAR3	NM_001261408,NM_001261409,NM_001261410,NM_003567	NM_013867	66.506	56.151	34.0476	77.7778	56.1743	29.011	0	0	2	2.5125	2.98438	0.248305	0.922638	NA	2.76602	1.97129	-0.48867	0	0	0	0	0	0	0	0	0	0
BCAS2	NM_005872	NM_026602	62.7119	49.115	38.301	49.0566	43.0678	32.1053	0	0	0	5.14297	3.52773	-0.54386	-2.99433	NA	15.7812	24	0.604823	0	1	0	0	0	1	0	0	0	0
BCAS4	NM_001010974,NM_017843,NM_198799	NA	NA	NA	NA	84.375	64.8693	52.3726	0	0	0	7.66563	6.36406	-0.268455	1.49394	NA	5.55625	6.1375	0.14354	0	1	0	1	0	0	0	0	0	0
BCAT2	NM_001164773,NM_001190,NR_028450,NR_028451	NM_009737	68.6099	57.022	56.0109	71.4286	62.237	57.4176	0	0	0	15.0375	14.5156	-0.0509575	1.88917	6.47021	24	5.78906	-2.05163	0	0	0	0	0	0	0	0	0	0
BCCIP	NM_016567,NM_078468,NM_078469	NM_025392	76	48.4753	28.7313	69.5652	42.963	29.5374	0	0	0	10.4297	6.10156	-0.773446	-3.39213	5.82626	23.3687	24	0.0384538	0	0	0	0	0	0	0	0	0	0
BCKDHA	NM_000709,NM_001164783	NM_007533	47.619	59.8061	58.1509	58.9744	60.5381	61.461	0	0	0	24	24	0	1.46929	0.466805	24	24	0	0	0	0	0	0	0	0	0	0	0
BCKDHB	NM_000056,NM_183050	NM_199195	44.2953	49.1228	37.1429	74.6269	48.1764	25.9868	0	0	1	24	12.075	-0.991011	-1.49619	NA	11.8438	16.7	0.495722	0	0	0	0	0	0	0	0	0	0
BCKDK	NM_001122957,NM_001271926,NM_005881	NA	NA	NA	NA	70.7989	58.9253	60.6579	2	1	0	10.475	12.1344	0.21215	1.55975	NA	8.51094	7.24062	-0.233204	0	0	0	0	0	0	0	0	0	0
BCL2	NM_000633,NM_000657	NM_009741	51.2195	60.9001	42.8431	44.0162	67.1521	62.1053	1	1	0	2.43086	2.44512	0.00843729	0.514331	2.00531	2.57461	1.97344	-0.383642	0	0	0	0	0	0	0	0	0	0
BCL2L1	NM_001191,NM_138578	NM_001289717,NM_009743	55.8824	55.8405	56.6689	55.7377	56.8376	56.6063	0	0	1	3.15313	5.20937	0.724328	1.84271	NA	2.31094	2.23516	-0.048103	0	0	0	0	0	0	0	0	0	0
BCL2L11	NM_001204106,NM_001204107,NM_001204108,NM_001204109,NM_001204110,NM_001204111,NM_001204112,NM_001204113,NM_006538,NM_138621,NM_138622,NM_138623,NM_138624,NM_138625,NM_138626,NM_138627,NM_207002,NM_207003	NM_207680	62.5551	55.4992	46.2067	65.9722	57.0175	43.2152	3	1	5	0.218066	3.04141	3.8019	-0.070529	NA	2.21328	1.88242	-0.233597	0	0	0	0	0	0	0	0	0	0
BCL2L12	NM_001040668,NM_138639	NM_029410	57.6	62.7604	33.5165	55.132	64.5771	42.2619	0	0	0	6.48828	5.00312	-0.375007	-1.14259	NA	8.8375	24	1.44132	0	0	0	0	0	0	0	0	0	0
BCL2L13	NM_001270726,NM_001270727,NM_001270728,NM_001270729,NM_001270730,NM_001270731,NM_001270732,NM_001270733,NM_001270734,NM_001270735,NM_015367,NR_073068,NR_073069	NM_153516	62.7119	55.0192	47.4775	63.7394	51.0288	44.6552	2	2	0	4.39375	6.14766	0.484584	1.48768	5.11434	3.58945	3.28828	-0.12643	0	0	0	0	0	0	0	0	0	0
BCL2L2	NM_001199839,NM_004050	NM_007537	67.6991	61.512	49.0929	69.5652	62.543	48.6757	1	0	0	5.25312	7.54375	0.522106	0.465	NA	1.87871	3.14062	0.741309	0	0	0	0	0	0	0	0	0	0
BCL2L2-PABPN1	NM_001199864	NA	NA	NA	NA	70.3057	55.988	45.495	1	1	0	8.28281	7.97344	-0.0549189	-1.20758	0.881629	24	19.275	-0.316304	0	0	0	0	0	0	0	0	0	0
BCL3	NM_005178	NM_033601	78.4946	64.0683	54.3902	82.8571	68.8645	55.711	0	0	0	2.09023	9.8	2.22912	0.279661	NA	2.00156	1.64531	-0.282765	0	0	0	0	0	0	0	0	0	0
BCL7A	NM_001024808,NM_020993	NM_029850	68.6813	54.5024	51.587	74.4526	54.6603	52.2735	0	0	0	1.78027	0.212158	-3.06889	1.50895	11.7907	1.43467	1.13059	-0.34364	0	0	0	0	0	0	0	0	0	0
BCL7B	NM_001197244,NM_001707,NR_036682	NM_009745	79.0179	55.3366	52.1081	84.0764	57.4713	52.4868	0	0	0	4.59297	4.64062	0.0148921	1.80112	18.1114	3.75937	4.62969	0.300422	0	0	0	0	0	0	0	0	0	0
BCL7C	NM_004765	NM_009746	80.2956	61.7737	50	85.0746	64.6789	52.8571	0	0	0	24	10.7063	-1.16458	-2.1028	2.2176	24	24	0	0	0	0	0	0	0	0	0	0	0
BCL9L	NM_182557	NM_030256	64.0187	62.4972	57.8512	69.2228	65.5778	57.1491	0	0	1	1.51982	2.51875	0.728804	1.25146	NA	1.90488	1.98242	0.0575617	0	0	0	0	0	0	0	0	0	0
BCLAF1	NM_001077440,NM_001077441,NM_014739	NM_001025392	49.3617	44.7464	32.8419	47.0356	42.49	32.211	3	1	2	10.0188	5.89062	-0.76621	-1.22134	1.22534	12.8125	13.4437	0.0693836	0	0	0	0	0	0	0	0	0	0
BCOR	NM_001123383,NM_001123384,NM_001123385,NM_017745	NM_029510	72.6452	53.5227	33.07	66.7808	54.1812	31.518	0	0	1	2.23652	0.945764	-1.24171	0.538252	5.31627	2.48516	1.8541	-0.422616	0	0	0	0	0	0	0	0	0	0
BCR	NM_004327,NM_021574	NM_001081412	82.3077	58.1956	52.6985	82.7181	61.4256	54.5527	4	0	0	6.26719	5.37734	-0.220925	2.07167	17.9331	4.52266	5.69062	0.331417	0	0	0	0	0	0	0	0	0	0
BCS1L	NM_001079866,NM_001257342,NM_001257343,NM_001257344,NM_004328	NM_025784	57.0881	51.8695	45.9677	62.0438	55.7937	52.6316	0	0	0	23.3125	10.8	-1.11007	0.586129	3.0176	10.9	7.86719	-0.470408	0	0	0	0	0	0	0	0	0	0
BDH1	NM_004051,NM_203314,NM_203315	NM_175177,NM_001122683	60.5796	54.7481	46.9045	70.8	57.2674	54.072	0	0	0	4.95625	3.98281	-0.315461	0.26585	NA	3.87578	4.26797	0.139063	0	1	0	1	0	0	0	0	0	0
BDH2	NM_020139	NM_027208	48.4716	49.8645	44.878	45.7143	46.0705	34.8098	0	0	1	24	17.8	-0.431157	-2.66381	NA	24	24	0	1	0	1	0	1	0	0	0	0	1
BDNF	NM_001143805,NM_001143806,NM_001143807,NM_001143808,NM_001143809,NM_001143810,NM_001143811,NM_001143812,NM_001143813,NM_001143814,NM_001143816,NM_001709,NM_170731,NM_170732,NM_170733,NM_170734,NM_170735	NM_007540	48.6656	52.0672	36.1121	72.5434	50.2688	38.1066	0	0	2	1.11046	2.45977	1.14736	-1.01017	NA	1.49883	2.06992	0.465742	0	0	0	0	0	0	0	0	0	0
BECN1	NM_003766	NM_019584	69.4268	51.8189	40.5103	67.9012	49.7413	33.4395	0	0	0	9.56563	7.575	-0.336613	-0.756571	3.18908	14.9656	12.2594	-0.287767	0	0	0	0	0	0	0	0	0	0
BEND3	NM_001080450	NM_199028	72.541	59.2413	46.098	52.4615	61.3189	45.7281	2	0	0	1.99707	3.51719	0.816538	1.09193	10.296	1.81572	1.8332	0.0138224	0	0	0	0	0	0	0	0	0	0
BET1	NM_005868	NM_009748	57.0621	38.3754	35.5397	60.4938	38.3754	34.107	0	0	0	5.2875	3.02305	-0.806582	-0.552042	NA	6.44062	12.5375	0.960977	1	0	0	0	1	0	0	0	0	0
BET1L	NM_001098787,NM_016526	NM_018742	61.1111	55.0595	52.7985	76.2376	56.8452	55.8032	2	1	0	2.5625	3.0707	0.261017	2.32051	73.2466	1.55039	1.47959	-0.0674346	0	0	0	0	0	0	0	0	0	0
BFAR	NM_016561	NM_025976	57.9661	50.1848	42.4354	57.2954	48.7805	44.7126	1	0	0	2.98359	2.84687	-0.0676721	1.66807	1.25882	3.4	4.19375	0.302706	1	0	1	0	0	0	0	0	0	0
BHLHA15	NM_177455	NM_010800	65.3226	61.4478	54.2507	67.8571	70.1754	75	0	0	0	0.874341	3.425	1.96984	2.91831	NA	NA	NA	NA	0	0	0	0	0	0	0	0	0	0
BHLHE40	NM_003670	NM_011498	62.3239	53.8835	43.5656	66.7752	55.4479	43.75	0	0	1	0.862817	4.29063	2.31406	-0.0386142	3.06355	1.63516	1.09014	-0.584919	0	0	0	0	0	0	0	0	0	0
BICC1	NM_001080512	NM_031397	84.5238	53.9196	41.4007	0	47.5897	45.8763	0	0	0	6.29219	6.59766	0.0683918	-0.73358	NA	6.4125	5.9125	-0.117119	0	0	0	0	0	0	0	0	0	0
BICD1	NM_001003398,NM_001714	NM_009753	60.6742	46.0925	31.9929	64.1975	49.2424	40.2299	0	0	0	2.68711	2.53359	-0.0848695	-1.44519	NA	4.39062	4.825	0.136103	0	0	0	0	0	0	0	0	0	0
BICD2	NM_001003800,NM_015250	NM_029791	81.1475	59.4803	43.9239	75.4386	62.5859	42.1405	1	0	0	3.73047	4.58047	0.296138	1.00637	4.53853	2.90781	3.14883	0.11488	0	0	0	0	0	0	0	0	0	0
BID	NM_001196,NM_001244567,NM_001244569,NM_001244570,NM_001244572,NM_197966,NM_197967	NM_007544	66.6667	53.4014	47.232	73.9884	58.3333	41.1806	0	0	0	12.7094	8.24375	-0.624521	0.907806	NA	10.5	13.3	0.341037	0	0	0	0	0	0	0	0	0	0
BIN1	NM_004305,NM_139343,NM_139344,NM_139345,NM_139346,NM_139347,NM_139348,NM_139349,NM_139350,NM_139351	NM_009668	74.2105	57.8381	53.8462	78.9062	60.5303	55.2684	0	0	0	9.44844	9.13438	-0.0487698	2.33417	2.21284	7.9625	6.85938	-0.215144	0	0	0	0	0	0	0	0	0	0
BIN3	NM_018688	NM_021328	61.3636	52.4934	49.8896	59.7938	55.643	56.7814	1	1	0	2.97656	3.77188	0.341634	2.01269	6.03703	2.12051	2.56328	0.273582	0	0	0	0	0	0	0	0	0	0
BIRC2	NM_001166,NM_001256163,NM_001256166	NM_007465	38.4813	45.6226	39.2996	71.9388	40.1754	31.2115	0	0	0	4.66641	5.03281	0.109053	-1.22061	NA	6.5	11.9187	0.874721	0	0	0	0	0	0	0	0	0	0
BIRC5	NM_001012270,NM_001012271,NM_001168	NM_009689	69	52.9551	45.5189	72.7273	52.9138	50.3123	3	0	0	8.68281	9.0375	0.0577612	1.87922	3.68337	6.10078	5.12266	-0.252102	0	0	0	0	0	0	0	0	0	0
BIRC6	NM_016252	NM_007566	73.4104	47.0045	32.888	72.3881	43.6119	31.0865	0	0	0	8.24375	7.1	-0.215482	0.246549	3.64848	5.74062	7.81562	0.445153	0	0	0	0	0	0	0	0	0	0
BIRC7	NM_022161,NM_139317	NM_001163247	58.0645	56.993	48.4694	64.1618	66.6667	60.7143	0	0	0	7.67812	5.92812	-0.373178	-0.571162	NA	2.88672	5.26406	0.866746	0	0	0	0	0	0	0	0	0	0
BIVM	NM_001159596,NM_017693	NM_144558	54.0416	43.4062	37.1622	56.305	41.6076	35.7442	0	0	0	4.81875	6.10938	0.342366	0.165168	NA	3.23789	NA	NA	1	0	1	0	0	0	0	0	0	0
BLCAP	NM_001167820,NM_001167821,NM_001167822,NM_001167823,NM_006698	NM_016916	67.4051	55.6818	48.4293	68.8889	57.197	48.4605	1	1	0	3.55391	1.93184	-0.879433	1.19763	NA	3.99844	3.20938	-0.317144	0	0	0	0	0	0	0	0	0	0
BLM	NM_000057	NM_001042527	71.6049	43.8015	37.9699	68.0412	39.8684	31.6384	0	0	1	4.80703	2.95156	-0.703667	-0.535258	5.05295	4.77656	6.49375	0.443079	0	0	0	0	0	0	0	0	0	0
BLMH	NM_000386	NM_178645	65.7825	46.4181	50.6649	77.2334	46.7105	43.7956	0	0	0	7.14375	4.97187	-0.522892	1.19873	3.35555	6.27031	5.71172	-0.134612	0	0	0	0	0	0	0	0	0	0
BLOC1S1	NM_001487,NR_037655,NR_037656,NR_037657	NM_015740	66.2921	56.0847	48.1928	61.1111	59.3074	59.1837	0	0	0	16.1375	24	0.572617	-1.99189	0.257458	24	24	0	0	0	0	0	0	0	0	0	0	0
BLOC1S2	NM_173809,NR_046296,NR_046314,NR_046315	NM_028607	63.3333	50.2315	44.9519	73.5849	48.951	39.8352	0	0	2	4.49922	3.66875	-0.294386	-0.126443	0.481485	6.83125	22.6031	1.7263	0	1	0	1	0	0	1	1	0	0
BLOC1S3	NM_212550	NM_177692	75	72.2789	48	62.5	76.5189	53.8259	3	3	0	1.1012	1.03577	-0.0883718	1.46821	NA	1.19544	1.05583	-0.179159	0	1	0	1	0	0	0	0	0	0
BLOC1S5	NM_001199322,NM_001199323,NM_201280	NM_139063	70.5882	54.3011	47.6316	78.9474	49.4505	39.0548	0	0	0	0.763623	2.61992	1.77859	0.456304	1.06653	NA	1.50313	NA	1	0	1	0	0	0	0	0	0	0
BLOC1S6	NM_012388	NM_019788	60.8333	52.4085	42.9174	63.1111	44.5087	35.5959	2	0	1	8.29219	4.62031	-0.843762	-0.28805	0.18508	6.86094	12.5563	0.871928	1	0	1	0	0	0	0	0	0	0
BLVRA	NM_000712,NM_001253823	NA	NA	NA	NA	72.2892	50.0561	40.1869	0	0	0	8.45625	5.87812	-0.524662	-2.97568	3.31171	24	8.48438	-1.50015	0	0	0	0	0	0	0	0	0	0
BLVRB	NM_000713	NM_144923	70	59.7424	44.1948	69.2308	62.4799	50.4762	0	0	0	24	24	0	-2.87284	NA	24	24	0	0	0	0	0	0	0	0	0	0	0
BLZF1	NM_003666	NM_001160209,NM_001160208	47.769	46.6997	36.5591	45.3089	40.9809	40.3846	1	0	1	2.53594	0.57168	-2.14924	-2.03914	NA	6.14062	6.81406	0.15013	1	0	1	0	0	0	1	0	0	0
BMI1	NM_005180	NM_007552	68.5775	43.8974	32.3557	66.2055	40.9786	31.0859	1	0	0	4.57344	2.88125	-0.666584	0.0144735	NA	3.825	5.48125	0.519045	0	0	0	0	0	0	0	0	0	0
BMP1	NM_001199,NM_006129,NR_033403,NR_033404	NM_009755	76.6816	57.2245	56.0932	71.0526	60.1148	59.7663	1	1	0	24	24	0	0.931634	NA	17.7	24	0.439285	0	0	0	0	0	0	0	0	0	0
BMP2K	NM_017593,NM_198892	NM_080708	80.7531	51.2438	39.5872	79.5181	46.2708	29.8701	0	0	0	5.13984	4.50781	-0.189297	-0.956401	NA	6.66094	5.76797	-0.207662	0	0	0	0	0	0	0	0	0	0
BMP5	NM_021073	NM_007555	37.8601	47.1795	36.4005	35.2528	44.3956	26.8817	0	0	0	3.90625	3.03906	-0.362158	-2.03067	NA	5.97734	9.45156	0.661048	0	0	0	0	0	0	0	0	0	0
BMP6	NM_001718	NM_007556	75.576	60.8611	51.9697	76.4045	61.2192	39.7112	0	0	1	6.89141	3.76016	-0.874006	1.14072	NA	NA	NA	NA	0	0	0	0	0	0	0	0	0	0
BMPR1A	NM_004329	NM_009758	61.9744	43.9024	37.2703	56.0219	44.2777	34.6494	1	0	1	3.05938	2.2168	-0.46476	0.274969	NA	2.73633	2.87734	0.0724965	0	0	0	0	0	0	0	0	0	0
BMPR1B	NM_001203,NM_001256792,NM_001256793,NM_001256794	NM_007560	47.0914	48.8403	38.7468	55.1095	44.8641	34.4453	2	0	4	1.66709	2.36856	0.506675	-0.0539595	NA	2.71328	NA	NA	0	0	0	0	0	0	0	0	0	0
BMPR2	NM_001204	NM_007561	64.9641	46.9041	35.3383	62.9791	45.4283	32.9789	0	0	1	5.05938	4.35781	-0.215355	-0.455549	0.83404	7.80469	9.49687	0.283112	1	1	1	0	0	1	0	1	0	0
BMS1	NM_014753	NM_194339	62.5767	48.6641	49.6269	62.5698	45.986	38.5316	2	1	1	8.92188	5.96797	-0.580107	-0.792765	3.61538	6.85156	8.32812	0.281559	1	0	1	0	0	0	1	0	0	0
BNIP1	NM_001205,NM_013978,NM_013979,NM_013980	NM_172149	57.1429	50.0728	61.1979	66.3462	47.7438	51.7167	1	1	0	4.08594	4.28047	0.0671016	1.65686	NA	3.61563	2.81562	-0.36079	0	0	0	0	0	0	0	0	0	0
BNIP2	NM_004330	NM_001008238	67.9012	44.8677	40.8772	100	47.3242	31.7579	0	0	3	3.79844	2.18359	-0.798702	-1.32869	NA	7.56719	14.975	0.984727	0	0	0	0	0	0	0	0	0	0
BNIP3	NM_004052	NM_009760	68.1416	47.5177	35.7739	75.2	49.9145	31.432	1	1	0	20.8313	6.22813	-1.74188	-1.68884	0.447175	24	24	0	0	0	0	0	0	0	0	0	0	0
BNIP3L	NM_004331	NM_009761	62.3656	52.207	38.545	69.3548	50.4545	33.3947	1	0	1	13.6031	10.0828	-0.432041	-1.19742	NA	24	24	0	0	0	0	0	0	0	0	0	0	0
BOD1	NM_001159651,NM_138369	NM_001024919	81.5217	58.6207	47.5291	67.8414	59.6774	43.5161	1	1	0	5.54375	4.96016	-0.160477	0.294831	0.420498	6.16094	6.71563	0.124372	0	0	0	0	0	0	0	0	0	0
BOD1L1	NM_148894	NM_001081422	NA	46.3787	35.814	71.7949	44.2224	33.0181	0	0	0	4.69141	4.86016	0.0509823	-1.7725	6.13179	3.66797	5.45312	0.572102	0	0	0	0	0	0	0	0	0	0
BOK	NM_032515	NM_016778	73.6607	62.9283	54.3189	78.7671	68.3881	62.9953	1	0	0	4.81875	5.8125	0.2705	2.72767	NA	2.68008	1.75508	-0.61074	0	0	0	0	0	0	0	0	0	0
BOLA1	NM_016074	NM_026975	57.5	63.5266	48.7273	67.7686	66.4251	48.1366	0	0	0	2.94297	3.29688	0.163827	1.00958	0.330184	24	0.229199	-6.71029	0	0	0	0	0	0	0	0	0	0
BOLA3	NM_001035505,NM_212552	NM_175277	72.7273	55.8559	50.052	73.6842	49.0741	34.375	0	0	0	17.5938	8.25156	-1.09232	-5.36721	NA	24	24	0	0	0	0	0	0	0	0	0	0	0
BOP1	NM_015201	NM_013481	75	58.5266	51.9651	82.3529	65.3726	60.9375	1	1	0	12.0656	8.13906	-0.567969	0.0459069	3.54285	7.67188	6.99219	-0.133835	0	0	0	0	0	0	0	0	0	0
BORA	NM_024808	NM_175265	59.4796	48.289	38.0145	60.5042	40.3571	35.3183	1	0	1	2.26992	4.26562	0.910114	-1.10334	NA	5.82344	3.66406	-0.668427	0	0	0	0	0	0	0	0	0	0
BPGM	NM_001724,NM_199186	NM_007563	55.0725	50	48.2818	58.6364	46.4103	37.2449	0	0	0	4.05625	2.79844	-0.535525	-0.41245	NA	4.49922	10.3031	1.19534	0	0	0	0	0	0	0	0	0	0
BPHL	NM_004332,NR_026648,NR_026649,NR_026650	NM_026512	63.6364	53.7671	40.5145	65.3061	53.3105	42.3756	0	0	0	9.15312	24	1.3907	0.808159	0.97145	9.53125	24	1.3323	1	0	1	0	0	0	0	0	0	0
BPNT1	NM_006085	NM_011794	64.7541	53.8296	37.1851	52.907	45.1996	38.7665	1	0	0	9.41094	4.46953	-1.07422	-0.436925	0.454843	5.47422	5.97187	0.125531	1	1	1	1	0	0	0	0	0	0
BPTF	NM_004459,NM_182641	NM_176850	NA	51.6769	41.3299	78.6885	45.6956	34.4498	0	0	1	4.91172	3.57266	-0.459231	-1.11191	15.4651	5.60938	6.16641	0.13659	0	0	0	0	0	0	0	0	0	0
BRAF	NM_004333	NM_139294	85.119	48.8199	39.5521	75.4098	46.1538	31.8493	0	0	0	3.67969	6.47969	0.816341	-0.865474	NA	5.54375	4.0375	-0.4574	0	0	0	0	0	0	0	0	0	0
BRAP	NM_006768	NM_028227	77.9412	53.7725	50.5125	75.7732	47.4424	39.6006	2	0	0	2.325	6.61875	1.50933	0.0327288	NA	3.65781	3.96406	0.115999	0	0	0	0	0	0	0	0	0	0
BRAT1	NM_152743	NM_181066	69.5122	60.6318	48.0818	70.1389	66.7478	47.8764	0	0	0	5.44375	4.84297	-0.168709	1.01445	2.68589	3.00156	2.88828	-0.0555028	0	0	0	0	0	0	0	0	0	0
BRCA1	NM_007294,NM_007297,NM_007298,NM_007299,NM_007300,NR_027676	NM_009764	57.6923	46.6998	41.7747	31.5789	44.5175	42.8055	2	0	0	7.46094	6.79844	-0.134154	-0.186109	5.63818	5.6	8.5	0.602036	1	0	1	0	0	0	0	0	0	0
BRCC3	NM_001018055,NM_001242640,NM_024332	NM_001166459,NM_145956,NM_001166457	68.1319	44.5205	32.2166	74.0741	47.4886	37.0588	0	0	0	5.97031	5.36562	-0.15406	-0.461469	NA	9.43906	12.6969	0.427758	1	0	1	0	0	0	1	0	0	0
BRD1	NM_014577	NM_001033274	82.4451	54.6499	39.6189	56.4682	59.2068	39.5127	0	0	1	1.75742	2.71563	0.627824	1.1134	7.93797	1.47256	1.36431	-0.110157	0	0	0	0	0	0	0	0	0	0
BRD2	NM_001113182,NM_001199455,NM_001199456,NM_005104,NR_037625	NM_010238,NM_001204973	68.4497	51.0638	50.7246	61.3924	50.8609	47.141	1	1	1	1.30845	4.21719	1.68843	1.54418	24.7835	1.52432	1.25942	-0.275398	0	0	0	0	0	0	0	0	0	0
BRD3	NM_007371	NM_001113573,NM_023336	67.0177	55.0206	46.431	71.2766	58.8721	47.0912	2	2	1	3.57422	3.33555	-0.0997047	1.32891	6.4812	2.38496	2.38828	0.00200692	0	0	0	0	0	0	0	0	0	0
BRD4	NM_014299,NM_058243	NM_020508	51.0373	56.2217	49.2558	54.0541	60.7483	58.1736	0	0	0	7.01328	8.85625	0.336606	1.57555	4.00462	5.94609	5.39375	-0.140654	0	0	0	0	0	0	0	0	0	0
BRD7	NM_001173984,NM_013263	NM_012047	77.5	47.955	41.0077	86.875	44.5808	33.1606	1	0	1	7.38281	6.48828	-0.186334	-1.71189	3.77751	12.8344	24	0.903021	0	0	0	0	0	0	0	0	0	0
BRD8	NM_001164326,NM_006696,NM_139199	NA	NA	NA	NA	63.6364	49.6849	41.358	0	0	0	3.44375	3.00703	-0.195641	-0.280859	35.0468	3.39453	3.59531	0.0829051	0	0	0	0	0	0	0	0	0	0
BRD9	NM_001009877,NM_023924,NR_027633	NM_001024508	67.8571	51.0033	44.6043	61.4379	53.6391	54.5703	2	1	0	4.51875	6.21016	0.458706	1.76512	5.25428	3.01328	3.49922	0.215698	0	0	0	0	0	0	0	0	0	0
BRE	NM_001261840,NM_004899,NM_199191,NM_199192,NM_199193,NM_199194	NM_144541	67.9426	48.4375	54.717	71.8254	45.9201	51.1628	2	0	0	24	15.3375	-0.645971	-0.897406	0.393001	22.6938	24	0.0807394	0	0	0	0	0	0	0	0	0	0
BRF1	NM_001242786,NM_001242787,NM_001242788,NM_001242789,NM_001242790,NM_001519,NM_145685	NM_028193	76.6038	56.0315	51.1983	67.7536	60.0758	64.664	0	0	0	3.76875	3.47734	-0.1161	2.8329	14.7281	2.59609	2.4627	-0.0761047	0	0	0	0	0	0	0	0	0	0
BRF2	NM_018310	NM_025686	63.7931	56.5321	41.9355	63.0769	56.8254	47.377	0	0	0	1.24092	2.63594	1.08691	2.37528	3.06768	0.759473	0.723828	-0.069351	0	0	0	0	0	0	0	0	0	0
BRI3	NM_001159491,NM_015379	NM_018772	85.4167	65.0794	43.418	89.1473	64.5503	44.3662	0	0	0	24	8.84062	-1.44081	-2.39712	NA	24	24	0	0	0	0	0	0	0	0	0	0	0
BRI3BP	NM_080626	NM_029752	77.6596	62.7297	45.6611	82.5175	65.0794	40.4826	0	0	0	5.70156	3.75664	-0.601914	0.192073	2.85001	4.38438	5.90781	0.430253	0	0	0	0	0	0	0	0	0	0
BRICD5	NM_182563	NM_175682	59.0504	56.381	57.037	64.6809	65.2111	68.8073	0	0	0	5.1	13.7969	1.43577	0.713294	0.417718	2.64297	4.07109	0.623257	0	0	0	0	0	0	0	0	0	0
BRIX1	NM_018321	NM_026396	72.2222	42.9379	39.6641	75	40.678	22.9947	0	0	1	3.29062	2.21094	-0.573703	-3.49734	0.8	9.30937	24	1.36628	0	0	0	0	0	0	0	0	0	0
BRK1	NM_018462	NM_133937	100	48.6842	50.2917	75.4717	48.6842	44.581	1	0	0	20.5375	12.1078	-0.762323	-0.731914	0.341817	24	24	0	0	0	0	0	0	0	0	0	0	0
BRMS1	NM_001024957,NM_015399	NM_134155	70.2128	55.4656	57.6541	68.0272	57.085	61.7486	1	0	0	7.9	7.87188	-0.00514534	1.20534	10.1775	7.64375	7.5875	-0.010656	0	0	0	0	0	0	0	0	0	0
BRMS1L	NM_032352	NM_001037756	71.7391	45.3704	42.3764	72.2222	40.4321	31.7631	0	0	3	4.96328	3.45156	-0.524044	-0.963995	3.00661	9.94063	NA	NA	0	0	0	0	0	0	0	0	0	0
BROX	NM_144695	NM_027861	56.701	47.3301	40.8	56.2025	39.4822	30	0	0	0	10.9	8.8875	-0.294479	-1.19628	NA	24	24	0	0	0	0	0	0	0	0	0	0	0
BRPF1	NM_001003694,NM_004634	NM_030178	66.129	55.3061	47.7037	75.188	57.5034	50.7508	2	1	1	1.58477	2.10742	0.411209	1.38656	10.5061	1.71221	1.44395	-0.245841	0	0	0	0	0	0	0	0	0	0
BRPF3	NM_015695	NM_001081315	79.8658	57.5934	52.1317	82.5893	56.3571	48.5099	0	0	1	3.21172	3.84922	0.26122	1.05865	6.91923	2.07109	2.57891	0.316366	0	0	0	0	0	0	0	0	0	0
BRWD1	NM_001007246,NM_018963,NM_033656	NM_145125,NM_001103179	80.9524	47.1294	39.5086	76.6102	54.5455	34.9319	1	0	0	5.48125	4.95	-0.147076	0.247297	2.02105	3.57227	3.74531	0.0682468	1	0	0	0	1	0	0	1	0	0
BSCL2	NM_001122955,NM_001130702,NM_032667,NR_037948,NR_037949	NM_001136064,NM_008144	56.391	56.0811	44.898	67.8899	55.2083	56.4189	1	0	0	24	24	0	-0.678469	4.25154	24	NA	NA	0	0	0	0	0	0	0	0	0	0
BSDC1	NM_001143888,NM_001143889,NM_001143890,NM_018045	NM_133889	57.8947	55.9969	49.193	46.8085	56.9992	50.7246	4	1	0	3.35898	2.52422	-0.412188	1.28684	4.76327	2.79531	4.30703	0.623684	0	0	0	0	0	0	0	0	0	0
BSG	NM_001728,NM_198589,NM_198590,NM_198591	NM_009768	72.2222	58.6325	53.2544	75.1381	62.716	59.4126	0	0	0	24	24	0	0.906349	0.715269	24	24	0	0	0	0	0	0	0	0	0	0	0
BST2	NM_004335	NM_198095	60	58.7669	48.9362	0	56.5378	58.5859	1	0	0	15.0687	20.4875	0.443184	0.49618	0.445724	24	24	0	0	0	0	0	0	0	0	0	0	0
BTAF1	NM_003972	NM_001080706	76.0518	42.6897	37.908	77.551	41.3874	31.5108	0	0	4	4.88359	5.95234	0.285515	-0.924701	2.75385	3.92813	5.06094	0.365564	0	0	0	0	0	0	0	0	0	0
BTBD1	NM_001011885,NM_025238	NM_146193	75	52.8971	36.5037	75.3695	49.6894	31.5018	0	0	0	24	6.34687	-1.91892	-0.401849	0.251649	24	24	0	0	0	0	0	0	0	0	0	0	0
BTBD10	NM_032320	NM_133700	59.7143	45.5182	36.9863	62.2568	43.1373	36.0097	0	0	0	4.95937	2.95156	-0.748679	-0.647822	NA	5.12969	8.08437	0.656265	0	0	0	0	0	0	0	0	0	0
BTBD2	NM_017797	NM_145361	60.8133	62.9771	59.8028	0	66.7934	66.9231	1	0	1	16.7312	10.5844	-0.660608	2.25113	2.8	9.92656	8.0125	-0.309042	0	0	0	0	0	0	0	0	0	0
BTBD3	NM_014962,NM_181443	NM_145534	50.3614	52.2913	40.1432	60.5578	49.062	37.2482	3	2	0	1.8667	2.09941	0.169497	-0.179413	NA	2.17598	2.44492	0.168125	0	0	0	0	0	0	0	0	0	0
BTBD6	NM_033271	NM_001145900	76.3158	56.8507	49.7462	88.8889	62.0713	49.1686	0	0	0	7.68125	6.99219	-0.135597	0.00921791	NA	5.80156	6.62031	0.190458	0	0	0	0	0	0	0	0	0	0
BTBD7	NM_001002860,NM_018167	NM_172806	59.1111	48.8358	34.5055	66.2577	46.749	39.3817	2	0	4	2.72461	1.87285	-0.540812	0.419332	1.04861	3.26875	3.00781	-0.120024	1	0	1	0	0	0	0	0	0	0
BTD	NM_000060	NM_025295	64.7059	54.4025	50.7508	56.3107	50.1838	45.4545	2	0	0	24	24	0	-0.922918	NA	14.825	24	0.695002	0	0	0	0	0	0	0	0	0	0
BTF3	NM_001037637,NM_001207	NM_001170540	65.2482	46.8303	34.4961	63.4328	44.3763	31.4286	1	0	0	24	9.49687	-1.33751	-2.91295	0.685324	24	24	0	0	0	0	0	0	0	0	0	0	0
BTF3L4	NM_001136497,NM_001243767,NM_152265	NM_027453	67.2269	42.7673	37.7996	64.4231	41.0901	36.2809	0	0	0	3.26406	1.97676	-0.723533	-0.787665	NA	6.71563	15.7719	1.23176	1	1	0	1	1	0	0	0	0	0
BTG3	NM_001130914,NM_006806	NM_001297747,NM_009770	82.4074	46.3768	30.7517	75.3846	42.6877	28.8939	0	0	0	4.34844	2.36113	-0.881018	-1.00029	NA	5.97031	24	2.00716	0	0	0	0	0	0	0	0	0	0
BTN2A1	NM_001197233,NM_001197234,NM_007049,NM_078476	NA	NA	NA	NA	49.3197	53.0335	44.7199	2	0	0	3.40625	4.38281	0.363673	0.764672	19.8503	1.77988	1.77148	-0.00682397	0	0	0	0	0	0	0	0	0	0
BTN3A1	NM_001145008,NM_001145009,NM_007048,NM_194441	NA	NA	NA	NA	41.5761	51.6213	46.3911	0	0	0	3.69375	3.77227	0.0303452	1.0869	NA	3.77813	3.03828	-0.314415	0	1	0	1	0	1	0	0	0	0
BTN3A2	NM_001197246,NM_001197247,NM_001197248,NM_001197249,NM_007047	NA	NA	NA	NA	40	53.2051	47.6078	4	1	0	6.86719	6.23125	-0.140198	1.12475	NA	4.74062	5.49766	0.213739	1	1	1	0	0	1	0	0	0	0
BTN3A3	NM_001242803,NM_006994,NM_197974	NA	NA	NA	NA	37.037	52.1937	42.1315	1	0	0	3.51562	2.95938	-0.248489	0.572195	NA	2.66953	3.73047	0.482771	0	1	0	0	0	1	0	0	0	0
BTRC	NM_001256856,NM_003939,NM_033637	NM_001037758,NM_001286465	72.381	50.5501	50.4545	70.9459	44.5614	44.4736	2	0	0	2.42461	4.425	0.867925	0.863001	NA	3.96563	NA	NA	0	0	0	0	0	0	0	0	0	0
BUB1	NM_004336	NM_009772,NM_001113179	64.1667	40.7233	26.4463	68.75	42.6949	25	0	0	1	6.875	3.64297	-0.916245	-1.27695	0.619999	8.72969	10.2281	0.22854	0	0	0	0	0	0	0	0	0	0
BUB1B	NM_001211	NM_009773	56.962	50.459	44.1176	62.7358	43.3873	32.3607	0	0	1	5.25781	3.46094	-0.6033	-1.4729	1.70255	4.54375	5.45625	0.264026	0	0	0	0	0	0	0	0	0	0
BUB3	NM_001007793,NM_004725	NM_009774	62.5	52.4975	45.7426	61.157	48.318	38.535	0	0	0	5.39062	3.67031	-0.554549	-0.830459	0.576716	6.05469	6.01484	-0.0095253	0	0	0	0	0	0	0	0	0	0
BUD31	NM_003910	NM_001008705	40.6863	49.6795	49.2063	53.1178	49.1954	57.1429	1	0	0	11.6375	10.0969	-0.204872	0.0401025	0.496731	24	24	0	0	0	0	0	0	0	0	0	0	0
BYSL	NM_004053	NM_016859	53.8941	58.4287	51.2601	58.0357	58.5236	50.2941	0	0	0	2.81016	3.43125	0.288084	1.04381	0.877776	2.39394	2.82187	0.237264	0	0	0	0	0	0	0	0	0	0
BZW1	NM_001207067,NM_001207068,NM_001207069,NM_014670	NM_025824	66.5653	44.5238	36.3358	74.4	40.9449	33.4532	1	0	1	14.9812	8.49844	-0.817888	-0.0369489	3.0607	20.925	24	0.197807	0	0	0	0	0	0	0	0	0	0
BZW2	NM_001159767,NM_014038,NR_027624	NM_025840	61.8182	48.4127	44.5977	62.3457	45.873	38.8506	0	0	0	17.8813	8.125	-1.13801	-1.22257	NA	19.8	24	0.277534	0	0	0	0	0	0	0	0	0	0
C10orf137	NM_001202438,NM_015608	NM_178115	67.7778	46.6828	44.5143	64.5051	43.2607	36.0656	0	0	0	2.41562	3.37188	0.481155	0.0201628	NA	3.37344	2.97266	-0.182467	0	0	0	0	0	0	0	0	0	0
C10orf2	NM_001163812,NM_001163813,NM_001163814,NM_021830	NM_153796	54.5455	54.033	50.4662	54.963	55.0852	49.7194	0	0	2	2.12305	2.37812	0.163688	1.65613	4.86362	1.68838	1.40352	-0.266593	0	0	0	0	0	0	0	1	0	0
C10orf32	NM_001136200,NM_144591	NM_025563	66.6667	52.8302	41.5749	54.5455	49.8442	34.3643	0	0	0	6.19375	6.75312	0.124742	1.02553	NA	7.825	24	1.61687	1	0	1	0	0	0	0	0	0	0
C10orf35	NM_145306	NM_027251	63.285	60.6061	52.1268	65.2941	61.4754	46.4815	0	0	0	3.59219	4.5125	0.329064	1.58228	3.70911	0.570752	3.79219	2.73209	0	0	0	0	0	0	0	0	0	0
C10orf76	NM_024541	NM_198296	70.2381	46.087	54.3127	73.5294	45.0725	52.0995	5	2	0	7.14844	15.4969	1.11628	1.99133	NA	5.88125	5.94922	0.0165775	0	1	0	1	0	0	0	0	0	0
C11orf24	NM_022338	NM_028077	62.8916	54.9618	47.5694	66.9683	57.1111	50.9677	0	0	0	4.1125	8.6625	1.07477	0.188261	0.971428	4.2375	4.42109	0.06119	0	0	0	0	0	0	0	0	0	0
C11orf30	NM_020193	NM_172280	57.7778	48.5903	45.3333	58.042	47.4931	35.0965	1	0	2	0.621191	3.60859	2.53833	-0.929166	NA	3.72187	3.16016	-0.236034	0	0	0	0	0	0	0	0	0	0
C11orf31	NM_170746	NM_001033166,NM_001037279	55.7377	58.9744	41.989	65.0289	64.2276	43.3506	1	0	0	23.7125	14.5	-0.709595	-1.1185	NA	24	24	0	0	1	0	1	0	0	0	0	0	0
C11orf48	NM_024099	NA	NA	NA	NA	62.037	54.798	47.1154	0	0	0	4.94844	3.09766	-0.675796	-0.933798	3.83999	11.2	3.96172	-1.4993	0	0	0	0	0	0	0	0	0	0
C11orf49	NM_001003676,NM_001003677,NM_001003678,NM_024113	NM_175123	57.1429	53.012	49.3179	66.9811	54.1165	55.5008	0	0	0	13.725	8.18125	-0.746413	1.88454	0.7306	7.75781	6.6875	-0.214183	0	0	0	0	0	0	0	0	0	0
C11orf57	NM_001082969,NM_001082970,NM_018195	NM_212449,NM_001134902	66.3738	44.1411	39.1096	59.3245	41.1832	38.4757	1	0	0	2.94648	3.58828	0.284298	-0.282219	0.879378	3.75078	3.62031	-0.0510766	1	0	0	0	1	0	0	0	0	0
C11orf58	NM_014267	NM_019772	65.4321	50.3663	38.262	65.7303	43.4783	36.0923	1	0	0	10.75	5.79688	-0.890989	-0.114749	4.17392	11.1937	17.8313	0.671714	1	1	1	1	0	0	0	0	0	0
C11orf68	NM_001135635,NM_031450	NM_001256515,NM_134149	66.6667	62.8763	57.0957	58.6207	66.2116	57.3416	0	0	0	1.45361	6.975	2.26255	1.02181	NA	1.62949	1.97461	0.277145	0	0	0	0	0	0	0	0	0	0
C11orf71	NM_001271562,NM_019021	NM_001004191	64.574	62.9944	51.1628	60.7306	56.5315	19.6581	0	0	0	1.42324	3.50703	1.30107	-1.62285	NA	4.27187	1.55391	-1.45897	0	0	0	0	0	0	0	0	0	0
C11orf73	NM_016401,NR_024596,NR_024597,NR_024598	NM_026304	58.2888	46.633	36.7275	60.084	42.5926	26.2295	0	0	0	21.7406	8.1875	-1.4089	-0.459694	0.484964	24	24	0	0	0	0	0	0	0	0	0	0	0
C11orf75	NM_020179	NM_133214	49.8403	59.4444	47.0716	60.8527	61.1111	45.8101	0	0	0	6.62188	9.59219	0.53462	-0.0626468	NA	3.56875	9.0625	1.34449	0	0	0	0	0	0	0	0	0	0
C11orf80	NM_024650,NR_048553	NM_001033447	NA	55.5703	NA	71.4286	52.3599	74.8227	1	0	0	15.4563	13.1375	-0.2345	0.37522	NA	8.14375	18.8281	1.20912	0	0	0	0	0	0	0	0	0	0
C11orf82	NM_145018	NM_001080995	52.907	39.963	33.7526	59.8361	38.2382	32.6087	0	0	0	2.91719	2.55625	-0.190549	-1.70681	NA	3.31094	4.35469	0.395329	0	0	0	0	0	0	0	0	0	0
C11orf83	NM_001085372	NM_001160356	60.1852	59.2593	47.4501	73.913	64.1844	52.4112	1	0	0	5.50469	6.08125	0.143707	0.0743591	NA	24	24	0	0	1	0	1	0	0	0	0	0	0
C11orf84	NM_138471	NM_001033139,NM_001167831	76	59.4241	49.3377	83.0508	63.3508	56.304	1	1	1	3.18945	11.3984	1.83746	1.01289	8.99607	1.84893	1.97441	0.094737	0	0	0	0	0	0	0	0	0	0
C11orf95	NM_001144936	NM_175381	87.013	69.4158	53.5025	84.2105	72.705	55.5871	2	1	0	1.43115	1.68574	0.236207	1.97902	NA	0.992313	0.84209	-0.236822	0	1	0	0	0	1	0	0	0	0
C12orf10	NM_021640	NM_021713	56.25	56.343	45.9016	69.2308	59.8585	37.5	0	0	0	16.2156	13.8844	-0.223922	-1.03606	2.41696	19.0406	24	0.333953	0	0	0	0	0	0	0	0	0	0
C12orf23	NM_152261	NM_001013028	76.9231	47.9885	34.5562	72.9947	47.2934	32.4508	1	0	0	3.42578	3.07031	-0.158047	0.389983	0.0919549	4.25547	5.55312	0.383982	0	0	0	0	0	0	0	0	0	0
C12orf29	NM_001009894	NM_175128	60.8392	44.6138	29.4118	69.6203	38.1391	28.0207	0	0	3	5.81172	4.25234	-0.450707	-1.00887	0.796445	7.81562	10.6719	0.449381	0	0	0	0	0	0	0	0	0	0
C12orf4	NM_020374	NM_138594	47.4359	47.7396	37.9242	54.5455	39.6022	37.4517	0	0	0	5.225	4.65937	-0.165295	-1.07294	NA	8.09375	10.3625	0.356492	0	0	0	0	0	0	0	0	0	0
C12orf43	NM_022895	NM_028211	58	59.9222	54.0873	47.8261	57.6679	51.5343	1	1	0	2.57617	2.65313	0.0424637	1.75134	1.7	2.20273	2.18945	-0.00872481	1	0	1	0	0	0	0	0	0	0
C12orf44	NM_001098673,NM_021934	NM_026566	61.7363	57.6865	53.4351	65.4737	57.6865	54.7541	0	0	0	2.78594	4.04844	0.539202	1.18836	3.54517	1.59434	1.90684	0.258225	0	0	0	0	0	0	0	0	0	0
C12orf45	NM_152318	NM_026579	55.2632	52.6882	46.3783	63.6364	46.9534	25.8065	0	0	0	7.47969	8.15	0.123822	-4.76586	0.423928	24	24	0	0	0	0	0	0	0	0	0	0	0
C12orf49	NM_024738	NM_001081236	71.9008	59.2233	49.7149	84.7826	56.4725	44.2793	3	0	0	4.47422	4.36172	-0.036739	0.997372	NA	4.10078	4.29531	0.0668646	0	0	0	0	0	0	0	0	0	0
C12orf52	NM_032848	NM_029096,NM_133908	61.5192	61.0236	52.9126	61.7521	62.963	53.7223	1	1	0	5.10156	8.22656	0.68935	1.40116	19.6969	3.89219	3.0457	-0.353806	0	0	0	0	0	0	0	0	0	0
C12orf54	NM_152319	NA	NA	NA	NA	50.3817	49.7396	46.2567	0	0	0	11.6219	10.65	-0.12599	-0.336968	NA	24	24	0	0	0	0	0	0	0	0	0	0	0
C12orf57	NM_138425	NM_013535	54.8387	60.105	46.8354	51.2195	62.4672	52.5	0	0	0	22.8062	24	0.0736052	-0.870769	0.56	24	24	0	0	0	0	0	0	0	0	0	0	0
C12orf65	NM_001143905,NM_001194995,NM_152269	NM_001134717	60.6667	51.1712	46.1934	55.8935	47.3054	45.3664	1	0	0	0.248438	2.01133	3.01719	0.344318	NA	1.31099	0.679834	-0.947398	1	0	1	0	0	0	1	0	0	0
C12orf75	NM_001145199	NM_001145198	75.8065	53.125	40.4789	83.5938	52.0833	33.4423	0	0	0	24	8.26562	-1.53784	-2.55502	0.840004	24	24	0	0	0	0	0	0	0	0	0	0	0
C14orf1	NM_007176	NM_021446	58.75	51.5366	42.7928	61.9469	51.3002	44.0602	0	0	0	24	7.31406	-1.71429	-0.87981	0.383333	24	24	0	0	0	0	0	0	0	0	1	0	0
C14orf119	NM_017924	NM_021437	62.04	52.4476	41.8468	59.8639	50.591	44.1263	0	0	1	3.12227	3.04531	-0.0360029	-0.794157	0.42759	6.32578	24	1.92372	1	1	1	1	0	0	0	0	0	0
C14orf166	NM_016039	NM_026528	79.7872	42.9932	38.9134	74.6154	41.4966	37.6344	0	0	0	24	7.29219	-1.71861	-3.05559	3.11687	24	24	0	0	0	0	0	0	0	0	0	0	0
C14orf169	NM_024644	NM_023633	72.619	64.404	47.1111	70.8861	62.5974	39.5197	0	0	0	0.749756	0.523145	-0.519211	0.318423	NA	1.37002	1.12542	-0.28374	0	0	0	0	0	0	0	0	0	0
C14orf2	NM_001127393,NM_004894	NM_027360	53.7037	42.9379	38.806	65.9794	42.3729	44.4444	0	0	0	24	24	0	-1.82269	0.383182	24	24	0	0	0	0	0	0	0	0	0	0	0
C14orf79	NM_174891	NM_145450	69.0821	56.5217	49.1589	72.549	54.2945	56.5217	1	0	0	1.10898	4.62734	2.06095	2.07662	NA	1.2312	1.40674	0.192287	0	0	0	0	0	0	0	0	0	0
C14orf80	NM_001134875,NM_001134876,NM_001134877,NM_001198983	NM_134041	56.25	61.2035	53.8573	73.2283	69.0867	65.894	0	0	0	3.79883	3.73555	-0.0242349	2.00072	5.69772	2.28125	1.87266	-0.284739	0	0	0	0	0	0	0	0	0	0
C14orf93	NM_001130706,NM_001130708,NM_021944	NM_028890	49.8534	57.2571	46.1165	49.8099	55.4113	45.2229	1	0	0	3.07539	2.25723	-0.446218	0.246133	NA	2.99727	2.79219	-0.102251	0	0	0	0	0	0	0	0	0	0
C15orf38-AP3S2	NM_001199058	NA	NA	NA	NA	77.4194	54.5148	50	3	0	0	5.81094	5.32578	-0.125778	1.82883	3.06377	NA	NA	NA	1	1	1	1	0	1	1	1	0	0
C15orf39	NM_015492	NM_028820	66.2162	59.9609	51.2195	71.3043	63.6132	57.5499	0	0	0	0.903735	24	4.73099	2.42251	1.36552	0.845557	0.656152	-0.365871	1	0	0	0	1	0	0	0	0	0
C15orf40	NM_001160113,NM_001160114,NM_001160115,NM_001160116,NM_144597,NR_027649,NR_027650	NM_026077	60.6383	52.4934	41.7476	76.4706	51.7778	28.8288	0	0	0	3.3168	3.39102	0.0319269	-0.789859	0.288937	24	24	0	0	0	0	0	0	0	0	0	0	0
C15orf41	NM_001130010,NM_032499	NM_207264	61.8421	50.2364	43.6385	66	48.227	34.685	2	0	0	3.30625	4.8	0.537839	-0.224302	NA	5.52969	NA	NA	0	0	0	0	0	0	0	0	0	0
C15orf57	NM_001080791,NM_001080792,NM_052849	NM_199310	62.6506	50.7407	47.8749	61.1111	50	46.6743	1	1	1	3.34297	2.3332	-0.518818	1.09283	NA	4.02813	9.45156	1.23044	0	0	0	0	0	0	0	0	0	0
C16orf13	NM_001040160,NM_001040161,NM_001040162,NM_001040165,NM_032366	NM_026686	73.3333	59.5122	51.1628	82.4561	66.6667	67.2619	0	0	0	24	24	0	-1.42508	0.81768	24	24	0	0	0	0	0	0	0	0	0	0	0
C16orf45	NM_001142469,NM_033201	NM_144518	60.4278	52.2876	44.326	70.9677	52.6829	50.5594	0	0	1	7.9125	6.05625	-0.385709	0.893571	NA	10.9719	7.62812	-0.52441	0	0	0	0	0	0	0	1	0	0
C16orf55	NM_001271907,NM_001271908,NM_001271909,NM_001271910,NM_153025,NR_073515,NR_073516	NA	NA	NA	NA	75.9259	55.3191	64.7242	0	0	0	4.76641	5.65937	0.247741	0.304822	1.339	2.8625	3.85156	0.428168	0	0	0	0	0	0	0	0	0	0
C16orf58	NM_022744	NM_145590	54.023	59.0293	55.4873	58.3333	61.194	59.6426	1	1	0	24	24	0	2.52013	9.79415	14.0375	6.95391	-1.01339	0	0	0	0	0	0	0	0	0	0
C16orf59	NM_025108	NM_028056	72	57.2082	44.5963	64.5161	65.5146	57.6271	1	0	0	5.19531	7.03906	0.438173	1.44229	4.78147	3.69023	3.72461	0.0133767	0	0	0	0	0	0	0	0	0	0
C16orf62	NM_020314	NM_027815	48.9978	52.2177	45.0359	60.4167	50.3957	40.9025	0	0	0	24	24	0	-0.0201273	1.37714	24	24	0	0	0	0	0	0	0	0	0	0	0
C16orf70	NM_025187	NM_145604	68.705	48.1481	49.3791	75	47.2025	50.9943	1	0	1	1.65957	1.64209	-0.0152763	1.05068	NA	2.08203	2.23984	0.105407	0	0	0	0	0	0	0	0	0	0
C16orf72	NM_014117	NM_001081400	77.2222	53.6232	38.36	80.5479	53.744	36.2886	0	0	0	2.35039	2.10742	-0.157422	0.638079	0.643477	2.38906	1.9	-0.330445	0	0	0	0	0	0	0	0	0	0
C16orf80	NM_013242	NM_008187	74.4966	47.4227	41.7476	66.065	48.11	41.2037	0	0	0	4.20312	4.77266	0.18333	0.238828	0.32911	3.47656	5.36406	0.625664	0	0	0	0	0	0	0	0	0	0
C16orf88	NM_001012991	NM_023197	72.973	52.3452	45.5771	60	52.0697	40.3226	1	1	0	2.42539	4.84766	0.99907	-0.115181	3.08889	2.76406	3.25625	0.236421	0	1	0	0	0	1	0	0	0	0
C16orf91	NM_001272051	NA	NA	NA	NA	64.9351	64.1604	48.2072	0	0	0	1.23582	10.25	3.05209	0.516345	2.8129	0.625244	0.932031	0.575959	0	0	0	0	0	0	0	0	0	0
C17orf49	NM_001142798,NM_001142799,NM_174893	NM_001177601	NA	57.1181	NA	79.3388	56.8401	54.4402	1	0	0	24	18.4344	-0.380636	-1.55688	11.765	24	24	0	0	0	0	0	0	0	0	0	0	0
C17orf51	NM_001113434	NA	NA	NA	NA	67.1875	57.3574	48.7411	5	2	1	1.17903	0.525293	-1.1664	1.88021	4.48124	1.20142	1.1511	-0.0617239	1	1	0	0	1	1	0	1	0	1
C17orf58	NM_181655,NM_181656	NA	NA	NA	NA	76.8254	53.0612	34.9754	0	0	1	2.76875	3.58008	0.370756	0.075942	NA	2.97266	NA	NA	0	0	0	0	0	0	0	0	0	0
C17orf62	NM_001033046,NM_001100407,NM_001100408,NM_001193653,NM_001193654,NM_001193655,NM_001193657,NR_036514,NR_036516,NR_036517,NR_036518,NR_036519	NM_001254735,NM_144832,NM_001252550,NM_001252548,NM_001252549	56.9194	53.9007	49.8031	74.7059	59.3972	61.3973	1	0	0	4.02813	4.85703	0.269966	2.18329	9.01094	1.99961	2.59648	0.376841	1	0	1	0	0	0	0	0	0	0
C17orf70	NM_025161,NR_033338	NM_027980	77.5862	60.9091	61.4141	79.4521	65.5707	64.9893	1	0	0	5.1875	7.71563	0.572744	2.35106	7.15767	3.85781	3.03594	-0.345641	0	0	0	0	0	0	0	0	0	0
C17orf75	NM_022344	NM_027472	73.5849	46.8697	40.6448	71.4286	44.1646	40.7586	0	0	1	6.45781	3.54297	-0.866087	-1.66836	NA	5.29922	3.6125	-0.552782	1	1	1	1	0	0	0	0	0	0
C17orf85	NM_001114118	NM_025818	66.6667	49.2965	44.8607	75	48.8459	44.9229	2	1	1	3.575	4.29688	0.265345	-0.571597	4.31795	3.77109	4.14141	0.135138	1	1	1	1	0	0	1	1	0	0
C17orf89	NM_001086521	NM_001110242	66.6667	67.1111	49.004	66.0377	74.2222	50.7092	1	1	0	15.9313	16.275	0.0307981	-1.85683	0.114285	24	24	0	0	0	0	0	0	0	0	0	0	0
C17orf96	NM_001130677	NM_175332	76.7221	71.6216	54.917	76.7654	73.9474	54.1212	5	4	0	2.99375	1.60957	-0.895278	1.59433	NA	1.86094	1.36143	-0.450911	0	0	0	0	0	0	0	0	0	0
C18orf25	NM_001008239,NM_145055	NM_178670	68.6111	50.4167	41.0118	64.3799	48.688	36.7062	0	0	1	2.20254	1.97793	-0.155176	-0.340896	NA	2.11563	2.40937	0.187575	0	0	0	0	0	0	0	1	0	0
C18orf8	NM_001276342,NM_013326,NR_075075,NR_075076	NM_029623	75	50.152	20.5357	83.2215	46.9098	22.3301	0	0	0	12.0094	7.01094	-0.776482	-1.28255	NA	5.74297	5.28047	-0.121131	0	0	0	0	0	0	0	0	0	0
C19orf10	NM_019107	NM_080837	68.9655	58.2834	47.4576	73.913	60.5364	54.7826	1	1	0	24	24	0	1.24921	3.50648	24	24	0	0	0	0	0	0	0	0	0	0	0
C19orf21	NM_173481	NM_030218	60.1562	57.7298	55.1136	67.4699	65	56.7308	2	0	0	2.47969	6.61875	1.4164	2.4935	NA	2.34707	2.23047	-0.0735138	0	0	0	0	0	0	0	0	0	0
C19orf24	NM_017914	NM_027207	72.7273	56.8807	54.7112	89.6552	70.1754	65.9529	0	0	0	9.23125	24	1.37844	0.0428241	3.26666	10.2344	4.44688	-1.20256	0	0	0	0	0	0	0	0	0	0
C19orf25	NM_152482	NM_025521	64.8889	62.1212	56.4899	71.0145	67.7871	63.7903	7	4	0	3.49531	9.43906	1.43322	2.69067	14.6612	2.49688	1.86367	-0.421976	0	0	0	0	0	0	0	0	0	0
C19orf26	NM_152769	NM_001195268	42.8571	64.0439	56.9892	80.9339	67.768	69.3122	2	2	0	2.85703	5.6	0.97091	2.38551	NA	1.56113	1.35239	-0.207079	0	0	0	0	0	0	0	0	0	0
C19orf33	NM_033520	NM_028179	64.8148	58.8406	57.4056	66.3265	62.9283	57.1429	0	0	0	10.6609	24	1.1707	-3.37553	NA	24	24	0	0	0	0	0	0	0	0	0	0	0
C19orf40	NM_152266	NM_178643	51.7034	52.7027	52.7273	61.0169	51.0802	54.8387	1	0	0	3.23945	3.94297	0.283532	1.58607	NA	5.80156	1.93613	-1.58326	1	0	1	0	0	0	0	0	0	0
C19orf43	NM_024038	NM_026760	65.1515	64.5594	50.8251	72.4138	65.725	53.5826	2	0	1	7.425	2.88125	-1.3657	-1.23252	0.63077	6.88125	14.5	1.07531	0	0	0	0	0	0	0	0	0	0
C19orf44	NM_032207	NM_028170	55.8559	53.271	47.5294	64.3836	53.0902	61.047	1	1	0	2.26894	2.87734	0.342716	1.19269	0.878539	1.33506	1.74102	0.383026	0	0	0	0	0	0	0	0	0	0
C19orf47	NM_001256440,NM_001256441,NR_046202	NM_175107	68.0203	57.0048	55.5468	78.9916	60.2763	61.8005	1	0	0	2.50508	6.51094	1.37801	0.926434	4.1885	2.14336	2.33789	0.125334	0	0	0	0	0	0	0	0	0	0
C19orf48	NM_199249,NM_199250	NA	NA	NA	NA	62.8458	63.5593	59.8465	1	1	0	1.87266	9.96875	2.41233	2.42597	8.00004	1.17278	1.4416	0.297743	0	0	0	0	0	0	0	0	0	0
C19orf52	NM_138358	NM_178619	55.6962	65.6679	45.3096	58.6667	71.1367	47.7695	1	1	0	3.01797	4.01953	0.413449	2.2451	2.16184	1.53672	1.38965	-0.145134	1	0	1	0	0	0	0	0	0	0
C19orf53	NM_014047	NM_001007571	62.069	57.8947	57.5949	71.4286	58	58.1882	2	1	0	11.3562	24	1.07955	-1.70644	3.84999	24	24	0	0	0	0	0	0	0	0	0	0	0
C19orf55	NM_001039887	NM_183321	56.6667	58.8451	50.1312	73.9726	63.271	51.2698	0	0	0	0.388428	3.99063	3.3609	0.189125	NA	2.2957	3.94219	0.780061	0	0	0	0	0	0	1	0	0	0
C19orf60	NM_001100418,NM_001100419	NM_025577	63.1579	60.9804	65.493	73.5043	68.8119	65.6051	0	0	0	20.0375	24	0.260332	-0.798832	NA	24	24	0	0	0	0	0	0	0	0	0	0	0
C19orf70	NM_205767	NM_153152	59.2233	54.4444	48.2877	66.1836	62.1849	68.2171	0	0	0	24	19.7688	-0.279813	-2.72262	0.301557	24	24	0	0	0	0	0	0	0	0	0	0	0
C19orf71	NM_001135580	NM_001014836	66.6667	65.5395	60	76.1905	66.9841	55	0	0	0	6.31875	9.74687	0.625301	1.72608	0.77068	2.52441	2.90234	0.20127	0	0	0	0	0	0	0	0	0	0
C1D	NM_001190263,NM_001190265,NM_006333,NM_173177	NM_020558	55.4054	43.4272	34.1395	62.0253	37.5587	30.3338	0	0	0	7.55938	2.83438	-1.41524	-1.66257	NA	14.4719	24	0.729782	0	0	0	0	0	0	0	0	0	0
C1GALT1C1	NM_001011551,NM_152692	NM_021550	60.3448	41.4301	26.9634	66.9456	39.2894	29.291	0	0	0	22.725	6.59687	-1.78443	-2.15465	NA	18.1875	24	0.400087	0	0	0	0	0	0	0	0	0	0
C1QBP	NM_001212	NM_007573	75	55.4762	37.4517	69.2308	54.5347	31.7797	0	0	0	24	10.5625	-1.18408	-2.49871	0.456986	24	24	0	0	0	0	0	0	0	0	0	0	0
C1orf109	NM_017850	NA	NA	NA	NA	57.8947	54.5752	38.1842	0	0	1	2.9582	2.37988	-0.31383	1.19522	2.46668	1.88467	1.75156	-0.105668	0	1	0	1	0	0	0	0	0	0
C1orf112	NM_018186	NM_201364	63.1579	45.5015	36.3171	41.1429	42.0765	29.703	0	0	0	6.90469	8.52031	0.30333	-0.724969	NA	6.41406	6.57031	0.0347236	0	0	0	0	0	0	0	0	0	0
C1orf115	NM_024709	NM_178692	64.7577	66.1972	52.5189	75.2137	70.1632	50.0412	2	0	1	5.05469	2.81641	-0.843767	1.2642	NA	4.09531	NA	NA	0	0	0	0	0	0	0	0	0	0
C1orf122	NM_001142726,NM_198446	NM_001142727	74.1525	67.3611	54.4503	76.6667	70.8333	54.3307	0	0	0	11.8187	9.34062	-0.339486	1.3407	1.67954	24	24	0	0	0	0	0	0	0	0	0	0	0
C1orf123	NM_017887	NM_028754	63.2075	55.6684	47.4239	73.8095	52.381	42.9338	0	0	0	10.5	10.625	0.0170735	-0.289811	4.33878	24	24	0	0	0	0	0	0	0	0	0	0	0
C1orf131	NM_152379	NM_025615	68.4211	48.6998	54.2797	75.6757	45.2381	34.4961	0	0	0	2.70078	3.13867	0.216778	-1.07158	NA	3.13906	4.84063	0.624859	0	0	0	0	0	0	0	0	0	0
C1orf151-NBL1	NM_001204088,NM_001204089	NA	NA	NA	NA	68.4211	64.652	61.1153	3	3	1	24	15.15	-0.663717	1.34372	5.66107	24	13.2438	-0.857723	0	0	0	0	0	0	0	0	0	0
C1orf159	NM_017891	NM_145557,NM_177205	56.5399	57.1667	51.0571	69.4444	65.9966	66.6047	3	1	0	4.37969	5.39219	0.300043	2.92786	10.583	4.30312	3.01016	-0.515546	0	0	0	0	0	0	0	0	0	0
C1orf174	NM_207356	NM_175287	73.2394	54.1126	47.9042	77.5701	52.459	42.0798	0	0	0	2.81641	2.48906	-0.178253	-0.12021	2.08004	2.57812	2.29492	-0.167877	0	1	0	1	0	0	0	0	0	0
C1orf198	NM_001136494,NM_001136495,NM_032800	NM_175149	80.1075	63.7771	52.1942	90.9091	63.9228	45.8836	2	0	1	4.60859	3.41992	-0.430363	2.37459	3.12279	4.08828	3.07812	-0.409443	0	0	0	0	0	0	0	0	0	0
C1orf216	NM_152374	NM_001145950,NM_001013755	73.1707	59.1631	49.1992	70.4918	61.3043	48.7472	1	0	1	2.99063	3.8125	0.35029	1.07026	11.7571	3.08945	2.05703	-0.586788	0	0	0	0	0	0	0	0	0	0
C1orf233	NM_001242659	NM_178699	85.5346	70.0893	56.4553	87.6543	77.6799	65.4107	1	1	0	24	18.3062	-0.390698	1.33421	NA	17.3125	20.1406	0.218295	0	0	0	0	0	0	0	0	0	0
C1orf27	NM_001164245,NM_001164246,NM_017847	NM_145511	61.2591	41.369	39.3799	53.8136	38.9011	35.1198	1	1	0	8.12031	5.69453	-0.511958	-1.55091	NA	7.94688	14.7875	0.895919	1	0	1	0	0	0	1	0	0	0
C1orf35	NM_024319	NM_024210	71.2963	59.0038	51.7766	71.2766	65.0253	54.2079	1	0	0	3.32695	7.09063	1.09171	1.52571	10.2187	1.62539	2.66484	0.713264	0	0	0	0	0	0	0	0	0	0
C1orf43	NM_001098616,NM_015449,NM_138740	NM_025762	55.4167	48.0315	43.9655	66.9231	49.8688	42.0912	0	0	0	12.5188	8.43125	-0.570272	0.884771	0.917738	13.2656	11.7125	-0.179644	0	0	0	0	0	0	0	0	0	0
C1orf50	NM_024097,NR_040733	NM_001012400	64.7059	57.5	48.3077	62.6866	55.5	44.2529	0	0	0	3.38594	24	2.82541	-0.14915	NA	6.68281	24	1.84451	0	0	0	0	0	0	0	0	0	0
C1orf52	NM_198077,NR_024113	NM_025555	75.5556	60.7735	40.8759	71.7949	52.6412	36	2	0	1	1.03125	0.462793	-1.15596	-0.476877	21.7518	4.4125	4.45312	0.0132218	1	1	1	0	0	1	1	0	1	0
C1orf63	NM_020317	NM_023665	58.7719	59.6433	37.6603	57.1429	54.8683	31.4706	0	0	3	1.52832	5.9	1.94877	-3.74131	1.85	0.742383	24	5.01473	0	0	0	0	0	0	0	0	0	0
C1orf85	NM_001256604,NM_001256605,NM_001256608,NM_001256609,NM_144580	NM_020003	50.8475	56.2963	50.5603	61.3636	59.2939	54.3417	1	0	0	24	24	0	0.145331	NA	21	24	0.192645	0	0	0	0	0	0	0	0	0	0
C1orf86	NM_001146310,NM_001256945,NM_001256946,NM_001256947,NM_182533,NR_046424,NR_046425,NR_046426,NR_046427	NM_001190445	57.1429	62.0321	51.25	76.9231	70.7182	70.625	0	0	0	11.7188	7.93906	-0.561778	0.184491	4.0512	24	24	0	0	0	0	0	0	0	0	0	0	0
C20orf111	NM_016470	NM_025699	65.2174	49.3151	41.1664	63.8889	48.6917	37.3537	1	1	0	1.91543	3.13047	0.708711	0.699675	NA	1.9375	2.12578	0.133797	0	0	0	0	0	0	0	0	0	0
C20orf24	NM_001199534,NM_018840,NM_199483,NR_026562	NM_026124	78.9773	53.0769	44.8852	77.0642	52.0513	42.2925	0	0	0	24	7.41719	-1.69409	-0.0585487	0.337778	24	24	0	0	0	0	0	0	0	0	0	0	0
C20orf27	NM_001039140,NM_001258429,NM_001258430,NR_047675	NM_026091	65.6627	56.1905	58.3636	75.9825	59.619	63.864	1	1	0	24	24	0	2.19206	3.51381	24	24	0	0	0	0	0	0	0	0	0	0	0
C21orf2	NM_001271440,NM_001271441,NM_001271442,NM_004928	NM_026431	76.2431	60.1333	52.1984	77.8846	67.0213	59.9681	2	2	0	4.9375	4.57422	-0.110255	1.60737	5.13034	3.86563	4.40625	0.18885	0	0	0	0	0	0	0	0	0	0
C21orf33	NM_004649,NM_198155	NM_138601	61.5385	59.0512	54.6845	66.2791	61.5861	50.7752	0	0	0	9.20937	10.1766	0.144075	2.64942	11.2065	6.41719	5.22109	-0.297589	0	0	0	0	0	0	0	0	0	0
C21orf59	NM_021254,NR_036552	NM_026502	74.7664	53.2646	34.9693	66.5753	48.5682	31.2169	0	0	0	8.49062	4.52656	-0.907455	-3.42927	11.9535	17.4812	24	0.457226	0	0	0	0	0	0	0	0	0	0
C22orf28	NM_014306	NM_145422	69.8276	50.3294	49.8667	61.8321	49.2754	47.7218	0	0	0	12.8438	8.22031	-0.643801	0.982319	0.800001	12.6562	11.0656	-0.193764	0	0	0	0	0	0	0	0	0	0
C22orf39	NM_001166242,NM_173793	NM_001033164	72.2222	66.3522	47.5132	57.7367	67.366	48.6099	1	1	0	5.6625	5.38125	-0.0734978	1.04102	NA	9.12187	24	1.39563	0	0	0	0	0	0	0	0	0	0
C2CD2	NM_015500,NM_199050	NM_174847	72.0126	55.1889	42.8123	81.405	59.5409	42.3019	0	0	0	3.69375	3.58281	-0.0439935	1.07002	NA	2.93281	2.91836	-0.00712772	0	1	0	1	0	0	0	0	0	0
C2CD2L	NM_014807	NM_027909	72.5888	60.4903	49.7526	76.8802	61.8173	57.259	0	0	0	3.31172	2.97383	-0.155259	1.69002	3.06667	1.84883	1.76602	-0.0661126	0	0	0	0	0	0	0	0	0	0
C2CD3	NM_015531	NM_001017985	61.7225	50.8319	44.0514	60.793	47.3184	42.3313	0	0	0	5.88047	9.79375	0.73593	0.491693	3.68273	7.13594	6.71563	-0.0875814	0	0	0	0	0	0	0	0	0	0
C2CD5	NM_014802	NM_001286578,NM_029081	68.6275	48.6398	41.636	63.5965	41.4585	30.9524	0	0	1	4.64062	3.80469	-0.286541	-0.344389	1.27143	4.19766	5.68438	0.437418	0	0	0	0	0	0	0	0	0	0
C2orf43	NM_021925	NM_172401	64.7727	44.8522	46.9706	63.6364	41.7178	40.5962	0	0	0	4.88594	6.24297	0.353597	0.518768	NA	NA	NA	NA	0	0	0	0	0	0	0	0	0	0
C2orf47	NM_024520	NM_001081181	63.5955	51.484	39.0266	63.354	51.484	28.115	0	0	0	4.76953	3.31641	-0.524227	-1.80891	NA	4.675	4.02344	-0.216538	0	0	0	0	0	0	0	0	0	0
C2orf68	NM_001013649	NM_026696	64.1304	62.0758	44.7636	75	61.0778	44.7996	2	1	0	7.13281	4.86172	-0.553005	-0.0995846	NA	9.79375	6.18594	-0.662869	1	0	1	0	0	0	0	0	0	0
C2orf74	NM_001143959,NM_001143960	NM_026105,NM_001110133	48.705	44.1624	40.5063	50.9524	43.1034	30.4636	0	0	0	5.30312	6.76875	0.352047	-2.02694	NA	24	24	0	0	0	0	0	0	0	0	0	0	0
C3orf17	NM_015412,NR_027794,NR_027796	NM_145972	75.8065	47.9056	42.651	68.8525	41.4906	39.7929	4	0	0	4.13359	4.12812	-0.00191004	-0.256267	NA	4.02969	4.1375	0.0380912	0	1	0	1	0	0	0	0	1	0
C3orf18	NM_001171740,NM_001171741,NM_001171743,NM_016210	NM_175486	60.6407	59.1919	50.6899	62.3693	59.9182	55.0858	2	0	0	5.29609	12.4516	1.23333	2.41478	NA	3.84375	2.28594	-0.749728	0	0	0	0	0	0	0	0	0	0
C3orf33	NM_173657	NM_177856	73.5294	47.6836	40.8882	64.0741	35.1852	40	1	0	1	1.8998	1.27471	-0.575686	0.0518413	NA	1.69053	2.10117	0.313721	0	1	0	1	0	0	0	0	0	0
C3orf37	NM_001006109,NM_020187	NM_173737	67.6768	53.1073	49.835	71.5909	51.4554	44.9679	0	0	0	7.36328	5.84453	-0.333262	0.884646	8.68272	5.93438	5.04844	-0.233259	0	0	0	0	0	0	0	0	0	0
C3orf52	NM_001171747,NM_024616	NM_145389	63.6364	47.032	40.535	75.3425	46.4832	43.1335	0	0	1	0.785889	2.46641	1.65001	1.55	2.43035	3.59141	2.93672	-0.290344	0	1	0	1	0	0	0	0	0	0
C3orf58	NM_001134470,NM_173552	NM_001033145	82.0388	57.85	34.8429	70.6542	56.7672	31.0249	0	0	2	0.625537	1.32812	1.08622	-0.369565	NA	1.81816	1.65478	-0.135839	0	0	0	0	0	0	0	1	0	0
C3orf62	NM_198562	NM_053216	66.6667	48.8801	38.4615	58.1281	46.8905	47.077	2	1	0	2.2957	6.26406	1.44816	0.631386	NA	1.50625	NA	NA	1	0	1	0	0	0	1	0	0	0
C4BPB	NM_000716,NM_001017364,NM_001017365,NM_001017366,NM_001017367	NA	NA	NA	NA	53.8462	47.9578	31.746	0	0	0	19.8	13.8938	-0.511064	-1.02873	NA	24	24	0	0	0	0	0	0	0	0	0	0	0
C4orf29	NM_001039717	NM_026622	62.3188	43.5125	36.9839	64.1509	41.2851	38.4615	0	0	0	4.92031	4.53281	-0.118343	-0.816478	NA	3.93203	3.12656	-0.330697	1	0	1	0	0	0	0	0	0	0
C4orf3	NM_001001701,NM_001170330	NM_024461	67.8899	59.0909	35.3846	64.0288	54.7264	40.8069	1	0	1	8.74062	6.64531	-0.395399	-0.990985	NA	24	24	0	1	0	1	0	0	0	0	1	1	0
C4orf46	NM_001008393	NM_029482	64.2857	57.7381	40.625	58.6345	55.2632	33.1629	0	0	3	2.24688	2.02266	-0.151669	-0.23129	NA	4.29688	4.825	0.167241	0	1	0	1	0	0	1	1	1	0
C4orf48	NM_001141936,NM_001168243	NM_001033458	84	69.9187	44	100	75.969	61.3636	0	0	0	24	24	0	-2.9802	2.06582	24	24	0	0	0	0	0	0	0	0	0	0	0
C4orf52	NM_001145432	NM_001145433	66.6667	56.6667	45.6958	72.9508	52.451	38.3721	0	0	0	10.2688	4.22813	-1.28017	-0.690376	NA	19.2344	9.90938	-0.956821	0	0	0	0	0	0	0	0	0	0
C5orf15	NM_020199	NM_153117	65	56.9231	44.8087	63.3588	46.8672	31.213	0	0	1	4.81641	3.27227	-0.557667	-0.613284	0.313966	10.4078	24	1.20537	0	0	0	0	0	0	0	0	0	0
C5orf22	NM_018356	NM_029998	76.3636	47.8555	43.7081	62.9921	41.9865	35.3432	0	0	1	7.2125	5.49609	-0.392093	0.147262	NA	7.93125	7.92656	-0.000852818	0	1	0	1	0	0	0	1	0	0
C5orf24	NM_001135586,NM_152409	NM_181278	77.9736	51.3228	38.294	74.1935	49.03	32.6851	0	0	1	3.95469	1.7918	-1.14216	-0.160919	NA	4.02969	8.18125	1.02165	1	0	1	0	0	0	0	0	0	0
C5orf28	NM_022483	NA	NA	NA	NA	49.6503	41.821	31.5228	3	0	0	2.63203	1.63516	-0.686748	-1.5668	NA	2.4707	7.55312	1.61215	1	0	1	0	0	0	0	0	0	0
C5orf45	NM_001017987,NM_016175	NM_026543	67.5676	55.4563	49.4845	70.4545	58.4775	39.2	0	0	0	4.25938	4.96328	0.220652	2.31505	5.28156	2.70625	2.72852	0.0118214	0	0	0	0	0	0	0	0	0	0
C5orf51	NM_175921	NM_145930	78.9474	46.3277	36.9231	0	40.339	35.9696	2	0	0	5.49766	4.27734	-0.362101	-1.86077	1.6	8.625	11.4859	0.413273	0	0	0	0	0	0	0	1	0	0
C5orf55	NM_138464	NA	NA	NA	NA	71.3396	61.3889	49.1979	0	0	0	1.70215	6.61094	1.9575	0.109853	NA	3.675	24	2.70722	1	0	1	0	0	0	0	0	0	0
C6orf1	NM_001008703,NM_001008704,NM_178508	NM_001002895	66.8874	56.9579	51.8617	68.9189	61.25	44.7761	0	0	1	4.62969	5.71875	0.304785	0.456148	NA	3.98125	4.38281	0.138636	0	0	0	0	0	0	0	0	0	0
C6orf106	NM_022758,NM_024294	NM_001033279	80.3571	52.3973	53.8123	73.0612	51.728	50.641	3	1	0	4.01953	5.1	0.34347	2.33853	7.97782	2.92578	2.99063	0.0316252	0	0	0	0	0	0	0	0	0	0
C6orf136	NM_001109938,NM_001161376,NM_145029	NM_001033630	74.5562	56.6456	48.2955	0	0	0	0	0	0	2.88516	8.00625	1.47248	-1.42475	NA	6.22109	2.60859	-1.2539	0	0	0	0	0	0	0	0	1	0
C6orf211	NM_024573	NM_024261	53.9216	46.8182	42.8729	56.7568	38.1599	31.5096	0	0	0	4.78437	3.41289	-0.487336	-1.28382	0.42104	11.3125	11.9062	0.0738013	0	0	0	0	0	0	0	0	0	0
C6orf223	NM_001171992,NM_153246	NA	NA	NA	NA	75	56.2893	59.726	4	1	0	3.15977	3.92344	0.312301	2.32289	NA	1.82969	2.04688	0.161825	1	0	0	0	1	0	0	0	0	0
C6orf47	NM_021184	NM_033477	56.1097	58.7302	50.0582	0	0	0	0	0	0	1.02357	0.273535	-1.90381	0.91035	4.9236	0.987181	0.912793	-0.113027	0	0	0	0	0	0	0	0	0	0
C6orf48	NM_001040437,NM_001040438	NA	NA	NA	NA	57.5179	46.4912	26.7327	0	0	0	17.0781	24	0.490884	0.195819	3.01975	24	24	0	0	0	0	0	0	0	0	0	0	0
C6orf62	NM_030939	NM_024473	50.8121	44.6377	36.1311	37.6726	43.0435	32.8627	0	0	0	4.93047	3.91914	-0.331187	0.728041	3.17333	5.69453	7.24375	0.34716	0	0	0	0	0	0	0	0	0	0
C6orf89	NM_152734	NM_030561	65.5385	50.3343	51.6422	69.0909	49.5767	47.4923	4	2	1	6.41719	4.87344	-0.397001	1.42218	NA	5.19766	7.84531	0.59397	1	1	1	0	0	1	0	0	0	0
C7orf26	NM_024067	NM_172726	78.5714	59.317	54.958	0	58.1481	57.1936	1	0	0	3.43984	2.99766	-0.198508	1.73434	4.89999	2.04512	1.62832	-0.328799	0	0	0	0	0	0	0	0	0	0
C7orf29	NM_138434	NA	NA	NA	NA	64.2086	61.1814	50.3423	1	0	0	3.70781	3.38789	-0.130181	1.14495	NA	1.03478	1.46182	0.49844	0	0	0	0	0	0	0	0	0	0
C7orf43	NM_018275	NM_153161	72.8395	62.0769	55.3265	80.5556	63.798	56.6836	1	0	0	1.62666	2.96797	0.867563	1.24347	NA	1.09325	1.17827	0.108048	0	0	0	0	0	0	0	0	0	0
C7orf49	NM_001243749,NM_001243751,NM_001243752,NM_001243753,NM_001243754,NM_001243755,NM_024033	NM_199145,NM_001135611	59.8148	57.173	52.3813	45.0262	53.8095	54.2403	0	0	0	2.14863	3.62461	0.754406	1.47491	16.7445	1.92188	1.99707	0.0553704	0	0	0	0	0	0	0	0	0	0
C7orf50	NM_001134395,NM_001134396,NM_032350	NM_028469	68.5714	60.034	50.8685	70.7317	62.3932	63.9498	0	0	0	10.7063	8.5375	-0.326568	1.64748	11.2163	24	24	0	0	0	0	0	0	0	0	0	0	0
C8orf22	NM_001007176,NM_001256596,NM_001256597,NM_001256598	NA	NA	NA	NA	42.4731	41.1765	32.0879	0	0	0	4.25312	3.76406	-0.176232	-0.809137	NA	11.2656	8.30625	-0.439659	0	0	0	0	0	0	1	0	0	0
C8orf33	NM_023080	NM_054099	NA	60.5381	48.9736	72.2222	58.5507	46.8233	1	0	0	8.08437	9.38594	0.215365	2.07138	3.18	6.61719	4.95937	-0.41606	0	0	0	0	0	0	1	0	1	0
C8orf40	NM_001135674,NM_001135675,NM_001135676,NM_138436	NM_001146117	79.9472	44.1358	43.8218	74.0741	41.358	35.2185	0	0	0	5.81641	4.59766	-0.339229	-1.03938	0.294832	24	24	0	0	0	0	0	0	0	0	0	0	0
C8orf58	NM_001013842,NM_001198827,NM_173686	NM_001004155	67.2131	56.3124	47.0511	81.6667	65.8915	51.4501	2	0	0	1.34619	6.90937	2.35967	2.18575	2.4186	0.947046	1.22227	0.368052	1	0	0	0	1	0	0	0	0	0
C8orf59	NM_001099670,NM_001099671,NM_001099672,NM_001099673	NM_001099674	55.6962	35.7143	33.871	43.3333	36.0269	33.5306	0	0	0	24	5.89375	-2.02578	-1.83713	NA	24	24	0	0	0	0	0	0	0	0	0	0	0
C8orf76	NM_032847	NM_029418	66.087	56.0322	35.514	80.7692	45.2318	29.932	0	0	0	3.59531	5.39844	0.586425	-1.78511	NA	5.2875	5.25781	-0.00812293	0	0	0	0	0	0	0	0	0	0
C8orf82	NM_001001795	NM_176828,NM_145472	55.1724	62.4049	59.9813	79.1139	71.275	70.0801	2	1	0	8.925	9.39531	0.0740891	2.23251	NA	7.5125	4.85469	-0.629915	0	0	0	0	0	0	0	0	0	0
C9orf114	NM_016390	NM_172660	76	57.772	54.8232	63.4146	60.4775	58.4457	5	2	1	4.75234	3.98398	-0.254427	1.67575	43.8315	2.21895	2.57305	0.213604	1	0	0	0	1	0	0	0	0	0
C9orf117	NM_001012502	NM_025619	46.3415	54.6438	52.1368	70	58.3493	47.0588	1	0	0	3.29688	4.48047	0.442551	1.84644	NA	2.48125	1.65644	-0.582977	0	0	0	0	0	0	0	0	0	0
C9orf142	NM_183241	NM_153557	59.5628	59.0615	56.6667	88.4615	66.3415	61.9883	0	0	0	12.7875	15.8562	0.310317	0.142832	10.4049	24	24	0	0	0	0	0	0	0	0	0	0	0
C9orf156	NM_016481	NM_029086	73.3333	54.3286	42.1053	62.3377	49.9246	33.7449	0	0	0	3.45508	2.33984	-0.562306	0.277923	2.24635	3.62031	2.44766	-0.564714	0	0	0	0	0	0	0	0	0	0
C9orf16	NM_024112	NM_198001	74.4048	61.1111	56.5385	73.6486	65.0794	68.0511	1	1	0	24	24	0	-2.66286	NA	24	24	0	0	0	0	0	0	0	0	0	0	0
C9orf3	NM_001193329,NM_001193331,NM_032823	NM_001289926,NM_001289924,NM_028079	42.0601	51.5372	48.5075	48.1651	49.5146	46.0259	1	1	0	4.5375	3.79375	-0.258273	0.858995	NA	2.76406	24	3.11817	0	0	0	0	0	0	0	0	0	0
C9orf37	NM_032937	NA	NA	NA	NA	63.1849	59.887	62.908	0	0	0	2.25254	2.14609	-0.0698388	0.522868	NA	1.39707	1.60859	0.203396	0	0	0	0	0	0	0	0	0	0
C9orf41	NM_152420	NM_026120	81.3636	45.1372	30.8846	77.7778	43.9024	36.6667	1	0	0	9.99062	4.60938	-1.116	-1.3955	NA	9.40156	9.80312	0.0603411	0	1	0	1	0	0	0	0	0	0
C9orf64	NM_032307	NM_027335	69.0141	56.9322	46.8281	63.7097	48.9279	40.367	0	0	0	3.39219	1.2727	-1.41432	0.440569	NA	5.04219	4.525	-0.156132	1	0	1	0	0	0	0	0	0	0
C9orf69	NM_001256526,NM_152833	NA	NA	NA	NA	79.2381	65.7143	61.1579	4	1	0	3.20625	5.65937	0.819756	2.50351	10.8878	1.88262	1.67168	-0.171441	0	0	0	0	0	0	0	0	0	0
C9orf78	NM_016520	NM_144885	62.963	52.9885	45.3049	75	50.4598	41.6667	0	0	2	8.51875	5.32891	-0.676802	-0.77371	3.19554	8.85	18.4344	1.05865	1	0	1	0	0	0	0	0	0	0
C9orf85	NM_182505	NM_025423	54.8507	44.0171	37.5854	59.2105	35.865	40.2936	0	0	0	5.34687	1.17729	-2.18322	-1.0591	NA	NA	24	NA	1	0	1	0	0	0	0	0	0	0
C9orf89	NM_032310	NM_026738	83.1325	60.1449	42.0118	75.8427	62.1377	45.4545	0	0	0	10.3234	13.6687	0.404958	0.501347	NA	24	24	0	0	0	0	0	0	0	0	0	0	0
C9orf91	NM_153045	NM_144905	53.9906	58.2119	50.1256	74.1935	57.7259	44.4695	2	0	0	5.20312	4.87578	-0.093745	1.68172	2.23241	3.18555	3.59219	0.173322	1	1	0	1	1	1	1	0	0	0
CA11	NM_001217	NM_009800	66.9767	60.0811	45.2381	59.6085	60.2837	52.8846	0	0	0	24	10.5625	-1.18408	-0.482835	NA	24	24	0	0	0	0	0	0	0	0	0	0	0
CA12	NM_001218,NM_206925	NM_178396	60.7362	51.831	46.8248	75	55.7746	46.6231	3	1	0	5.38594	4.21016	-0.355324	1.62797	NA	5.52813	6.80938	0.300732	1	0	1	0	0	0	0	0	0	0
CA13	NM_198584	NM_024495	71.9512	48.4157	36.2045	66.3743	46.8948	36.0132	0	0	1	8.08125	2.93906	-1.45922	-0.334187	0.355816	7.56719	7.7375	0.0321102	0	1	0	1	0	0	0	0	0	0
CAAP1	NM_001167575,NM_024828	NM_026368	67.3913	50.887	28.178	60.3989	42.7035	28.2178	0	0	1	4.07891	2.47344	-0.721665	-0.282834	NA	7.05938	8.91563	0.336795	0	0	0	0	0	0	0	0	0	0
CAB39	NM_001130849,NM_001130850,NM_016289	NM_133781	76.1792	43.4698	40.2548	78.0093	39.1813	36.4403	0	0	2	4.58594	3.42852	-0.419633	0.471256	0.377951	4.58203	5.42422	0.243428	0	0	0	0	0	0	0	0	0	0
CABIN1	NM_001199281,NM_001201429,NM_012295	NM_172549	65.8009	56.2462	54.1475	59.8425	58.5922	62.5	1	0	0	8.1125	11.0125	0.440924	1.72702	12.6307	5.54375	6.99688	0.335849	0	0	0	0	0	0	0	0	0	0
CABLES1	NM_001100619,NM_001256438,NM_138375,NR_023359	NM_001146287	72.0137	60.1681	51.9608	45.2675	51.3572	51.1763	2	2	0	4.04375	3.98125	-0.0224723	1.92002	7.21843	3.26719	3.1875	-0.0356241	0	0	0	0	0	0	0	0	0	0
CACFD1	NM_001135775,NM_001242369,NM_001242370,NM_017586	NM_029862	70.9677	60.8527	52.6168	67.6471	62.8131	64.4799	7	2	0	3.38086	3.98906	0.23866	2.78819	NA	2.15801	1.48828	-0.536053	0	0	0	0	0	0	0	0	0	0
CACHD1	NM_020925	NM_198037	73.7885	53.1937	42.9363	73.3333	48.6383	37.5418	0	0	0	2.04551	5.11562	1.32245	0.62859	0.934785	3.29219	5.08047	0.625915	0	0	0	0	0	0	0	0	0	0
CACNA2D1	NM_000722	NM_001110844	76.7802	43.315	35.3922	77.7344	40.7814	44.1379	0	0	0	24	21.675	-0.147002	-0.891837	NA	24	NA	NA	0	0	0	0	0	0	0	0	0	0
CACNB1	NM_000723,NM_199247,NM_199248	NM_145121	76.555	59.3645	57.7172	75	59.488	58.8946	4	2	0	0.614185	4.04648	2.71992	1.19018	NA	1.70195	1.58779	-0.100168	0	0	0	0	0	0	0	0	0	0
CACNB3	NM_000725,NM_001206915,NM_001206916,NM_001206917	NM_001286226,NM_007581	79.0123	58.8316	57.56	76.1062	58.6777	58.8123	0	0	0	5.65469	11.5781	1.03388	1.72947	2.56622	4.57344	3.47344	-0.396915	0	0	0	0	0	0	0	0	0	0
CACTIN	NM_001080543,NM_021231	NM_027381	61.1111	62.2251	54.8822	71.6981	66.1836	63.0603	1	1	0	5.73359	5.14922	-0.155086	2.14978	5.65324	3.43789	3.22187	-0.0936233	0	0	0	0	0	0	0	0	0	0
CACUL1	NM_153810	NM_030197	68.5246	49.8236	40.4505	72.1074	49.5495	39.5647	1	0	1	6.06719	5.03359	-0.269439	0.623654	NA	5.84687	5.77969	-0.0166741	0	1	0	1	0	0	0	0	0	0
CACYBP	NM_001007214,NM_014412	NM_009786	72.5962	41.0145	34.5	68.2353	39.738	36.191	0	0	0	14.4125	5.46953	-1.39783	-1.69518	0.890913	24	24	0	1	0	1	0	0	0	1	0	0	0
CAD	NM_004341	NM_023525	70.2857	57.3675	50.7042	71.6049	57.6969	54.8507	0	0	0	6.925	7.06641	0.0291626	1.7773	7.20727	5.34453	6.35938	0.250822	0	0	0	0	0	0	0	0	0	0
CADM1	NM_001098517,NM_014333	NM_001025600	NA	53.0303	NA	66.6667	51.994	36.2583	0	0	0	24	3.60781	-2.73384	-0.392825	NA	24	24	0	0	0	0	0	0	0	0	0	0	0
CALCOCO1	NM_001143682,NM_020898,NR_026554	NM_026192	54.4872	58.4297	45.4237	56.25	57.2254	48.4262	1	1	0	7.63438	5.75469	-0.407772	0.765499	NA	5.77266	6.20469	0.104123	0	0	0	0	0	0	0	0	0	0
CALCOCO2	NM_001261390,NM_001261391,NM_001261393,NM_001261395,NM_005831	NM_001271018	62.1622	52.8112	43.7075	71.2871	44.9664	42.4554	3	1	1	6.27734	5.29063	-0.246716	-0.102307	2.77868	5.90234	9.12187	0.628042	0	1	0	1	0	0	0	0	0	0
CALD1	NM_004342,NM_033138,NM_033139,NM_033140,NM_033157	NM_145575	59.6059	52.354	36.971	62.8959	50.9694	33.3473	0	0	0	8.34688	5.56875	-0.583883	-0.666756	NA	11.5125	24	1.05983	0	0	0	0	0	0	0	0	0	0
CALHM2	NM_015916,NR_024552,NR_046344	NM_133746	58.5145	58.9506	46.8951	63.5025	61.5226	47.8142	0	0	0	3.01172	8.35	1.47119	1.76425	NA	3.61797	NA	NA	0	0	0	0	0	0	0	0	0	0
CALM1	NM_006888	NM_009790	68.8172	46.6667	43.3689	70.1613	41.7778	41.8212	1	0	2	12.8	6.56719	-0.962796	-0.180242	1.3619	12.7094	17.3125	0.44592	0	0	0	0	0	0	0	0	0	0
CALM2	NM_001743	NM_007589	65	45.5556	35.6098	61.3924	39.1111	33.5735	0	0	0	17.0125	3.23555	-2.39451	-1.36275	9.74641	24	24	0	0	0	0	0	0	0	0	0	0	0
CALM3	NM_005184	NM_007590	77.1218	52	56.7878	80	52.8889	55.9239	1	0	1	8.72031	7.26562	-0.263293	1.85348	5.13913	8.025	6.43281	-0.319052	0	0	0	0	0	0	0	0	0	0
CALR	NM_004343	NM_007591	62.5	50.1199	47.6788	75	53.2695	52.6863	2	1	0	24	24	0	-0.580454	1.20645	24	5.07812	-2.24067	0	0	0	0	0	0	0	0	0	0
CALU	NM_001130674,NM_001199671,NM_001199672,NM_001199673,NM_001199674,NM_001219	NM_007594	66.055	46.9409	43.14	69.0789	45.8861	38.8863	3	0	1	21.0312	17.8313	-0.238127	0.178729	0.734604	24	24	0	0	0	0	0	0	0	0	1	0	0
CAMK1D	NM_020397,NM_153498	NM_177343	68.3453	50.3454	45.1502	78.7234	50.6908	46.8713	0	0	1	4.59531	3.8832	-0.242916	0.372449	NA	5.27656	3.17813	-0.731423	1	0	1	0	0	0	0	0	0	0
CAMK2D	NM_001221,NM_172114,NM_172115,NM_172127,NM_172128,NM_172129	NM_001025439	74.2268	48.8629	37.5605	70.4307	43.9805	35.6609	0	0	1	5.93984	5.54922	-0.0981403	0.224191	NA	8.06875	7.59063	-0.0881265	1	0	0	0	1	0	0	0	0	0
CAMK2G	NM_001204492,NM_001222,NM_172169,NM_172170,NM_172171,NM_172173	NM_001039138	74.7967	52.5369	49.799	76.9231	53.7572	50.2727	0	0	0	5.04141	4.52969	-0.154414	1.60951	2.0444	3.33477	4.06875	0.287	0	0	0	0	0	0	0	0	0	0
CAMK4	NM_001744	NM_009793	77.1831	51.2057	39.0592	78.7234	49.1561	34.7603	0	0	1	5.58437	5.53906	-0.0117539	-1.57211	NA	8.84531	NA	NA	0	0	0	0	0	0	0	0	0	0
CAMKK1	NM_032294,NM_172206,NM_172207	NM_018883	67.4603	56.1924	52.7528	52.1277	59.025	57.3623	3	2	0	2.35723	3.96875	0.751594	2.40117	5.59017	1.28394	1.69727	0.402639	0	0	0	0	0	0	0	0	0	0
CAMKK2	NM_001270485,NM_001270486,NM_006549,NM_153499,NM_153500,NM_172214,NM_172215,NM_172216,NM_172226	NM_145358,NM_001199676	75.576	57.8106	49.1667	78.2857	59.5326	49.7907	2	0	1	4.36562	3.53516	-0.304414	2.13958	2.52088	3.55703	3.61289	0.0224802	0	0	0	0	0	0	0	0	0	0
CAMKMT	NM_024766	NM_028576	NA	48.5597	NA	68.2692	46.9136	40.2923	0	0	0	16.7312	4.95859	-1.75454	-0.311914	NA	16.2063	17.2375	0.0890003	0	0	0	0	0	0	0	0	0	0
CAMLG	NM_001745	NM_007596	55.814	54.2373	38.6861	73.0496	48.8215	36.6116	1	0	0	3.30156	0.655664	-2.33212	-0.103105	NA	5.74297	6.09687	0.0862732	0	1	0	1	0	0	0	0	0	0
CAMSAP1	NM_015447	NA	NA	NA	NA	0	56.5398	43.09	0	0	3	4.64922	6.35313	0.450478	1.2205	3.83453	3.70391	4.01719	0.117138	0	0	0	0	0	0	0	0	0	0
CAMSAP2	NM_203459	NM_001081360	73.7631	47.1039	37.8816	75.5556	41.0863	30.5219	1	1	1	4.61094	3.26328	-0.498737	-0.37271	1.00318	4.64687	5.75391	0.308281	0	0	0	0	0	0	0	0	0	0
CAMTA1	NM_001195563,NM_001242701,NM_015215,NR_038934	NM_001081557	84.4156	57.9125	38.0952	79.7101	46.0905	31.2057	0	0	0	24	14.0844	-0.768938	-1.29839	0.740314	24	24	0	0	0	0	0	0	0	0	0	0	0
CAMTA2	NM_001171166,NM_001171167,NM_001171168,NM_015099	NM_001190376	70.0704	58.1949	58.6957	75	59.5437	62.4346	1	1	2	2.87734	11.2875	1.97192	2.00063	8.84823	3.90313	4.21484	0.11085	0	0	0	0	0	0	0	0	0	0
CAND1	NM_018448	NM_027994	75.2161	46.1684	40.0429	71.6247	39.9133	30.9336	0	0	0	8.30937	3.38437	-1.29585	-0.484463	3.20426	9.99062	9.36875	-0.0927184	0	0	0	0	0	0	0	0	0	0
CANT1	NM_001159772,NM_001159773,NM_138793	NM_029502,NM_001025618,NM_001025617,NM_001267591	64.5624	59.1584	56.1222	67	62.0232	52.3991	4	2	0	2.70273	2.48945	-0.118591	1.97545	1.63526	1.95488	2.22129	0.184315	0	0	0	0	0	0	0	1	0	0
CANX	NM_001024649,NM_001746	NM_007597,NM_001110499,NM_001110500	73.3696	45.3266	37.2684	75.1412	44.7442	35.5043	0	0	1	24	24	0	0.038614	2.58408	24	24	0	0	0	0	0	0	0	0	0	0	0
CAP1	NM_001105530,NM_006367	NM_007598	63.8889	50.3158	48.2061	70.3057	48.9496	43.19	1	0	0	24	10.9719	-1.12922	0.830333	0.585921	24	24	0	0	0	0	0	0	0	0	0	0	0
CAP2	NM_006366	NM_026056	67.1233	51.9916	40.6886	65.0206	48.0474	33.5556	1	0	0	9.21875	6.575	-0.48758	0.162952	NA	8.70312	14.1969	0.705968	0	0	0	0	0	0	0	0	0	0
CAPG	NM_001256139,NM_001256140,NM_001747	NM_007599,NM_001271395,NM_001042534,NM_001271415	56.0774	56.6667	61.1635	74.0385	58.6437	61.3793	0	0	0	24	24	0	-1.56478	NA	24	24	0	0	0	0	0	0	0	0	0	0	0
CAPN1	NM_001198868,NM_001198869,NM_005186,NR_040008	NM_007600,NM_001110504	67.1828	55.4155	60.3681	72.5275	59.5804	62.9167	0	0	0	24	24	0	1.609	4.24322	24	24	0	0	0	0	0	0	0	0	0	0	0
CAPN10	NM_023083,NM_023085	NM_011796	59.8394	59.0205	49.8759	76.5306	65.6265	59.4406	1	1	0	5.60078	4.17266	-0.424662	1.43921	5.9606	1.4228	2.03828	0.518617	0	0	0	0	0	0	0	0	0	0
CAPN12	NM_144691	NM_001110807	61.7647	60.5178	50.0838	60.1942	64.0278	50.9091	0	0	0	10.3172	9.29063	-0.151203	1.61317	11.3869	17.2688	24	0.474871	0	0	0	0	0	0	0	0	0	0
CAPN2	NM_001146068,NM_001748	NM_009794	77.0588	54.1607	41.9118	79.4643	54.874	37.2954	0	0	1	17.3	15.1406	-0.192347	0.493881	1.98752	19.2469	24	0.31841	0	0	0	0	0	0	0	0	0	0
CAPN7	NM_014296	NM_009796	73.3607	42.5471	39.1892	76.6667	41.2367	31.4614	0	0	2	9.54375	5.29766	-0.849202	0.21604	0.275242	7.13281	7.2125	0.0160283	0	0	0	0	0	0	0	0	0	0
CAPNS1	NM_001003962,NM_001749	NM_009795	70.1149	55.6382	56.8142	74.6753	57.9926	59.9222	0	0	0	24	24	0	1.37162	0.326349	24	24	0	0	0	0	0	0	0	0	0	0	0
CAPRIN1	NM_005898,NM_203364	NM_016739,NM_001111291,NM_001111289,NM_001111290,NM_001111292	71.2541	49.5763	36.8122	72.4868	49.0141	35.2451	1	0	0	6.85625	5.50312	-0.317169	0.261644	3.55728	9.075	10.0062	0.140932	0	0	0	0	0	0	0	0	0	0
CAPZA1	NM_006135	NM_009797	73.2283	44.0186	40.8617	57.6531	42.741	34.9025	0	0	0	21.7906	5.23125	-2.05848	-0.894915	0.629998	24	24	0	0	0	0	0	0	0	0	0	0	0
CAPZA2	NM_006136	NM_007604	77.6978	40.4181	35.1984	74.7573	39.3728	29.9569	1	0	0	12.6438	3.84219	-1.71842	-1.77828	NA	24	24	0	0	0	0	0	0	0	0	0	0	0
CAPZB	NM_001206540,NM_004930,NR_038125	NM_009798	76.378	52.1368	45.8791	79.8507	50.5495	50.1982	1	0	0	24	19.1562	-0.325219	0.481498	1.38025	24	24	0	0	0	0	0	0	0	0	0	0	0
CARD10	NM_014550	NM_130859	82.7586	63.6788	57.732	100	65.6986	59.724	1	1	0	4.52109	4.25312	-0.0881487	2.17964	3.17116	2.90313	2.58516	-0.167355	0	0	0	0	0	0	0	0	0	0
CARD8	NM_001184900,NM_001184901,NM_001184902,NM_001184903,NM_001184904,NM_014959,NR_033678,NR_033679,NR_033680	NA	NA	NA	NA	49.8305	43.662	28.8136	0	0	0	2.99883	0.684277	-2.13175	-1.32833	3.37005	5.59297	2.03047	-1.4618	0	0	0	0	0	0	0	0	0	0
CARHSP1	NM_001042476,NM_014316	NM_025821	62.5	59.7315	50.8921	66.6667	61.036	51.8702	2	1	0	4.54531	6.78125	0.577172	0.900282	3.03479	2.93906	2.72461	-0.109307	0	1	0	1	0	1	0	0	0	0
CARKD	NM_001242881,NM_001242882,NM_001242883,NM_018210,NR_040103,NR_040104	NM_026995	73.6842	58.2878	44.2149	64.3939	61.3445	50.7839	1	1	0	2.96094	3.87031	0.386396	1.6839	2.45226	2.17891	1.71641	-0.344213	0	0	0	0	0	0	0	0	0	0
CARM1	NM_199141	NM_021531	85.9649	56.486	55.5903	89.6825	59.9343	61.0837	0	0	0	18.6687	10.2156	-0.869847	2.36294	4.79046	13.2656	10.6719	-0.313879	0	0	0	0	0	0	0	0	0	0
CARS	NM_001014437,NM_001194997,NM_001751,NM_139273,NR_036542	NM_013742	69.0476	52.524	56.2305	66.6667	52.2029	46.3542	0	0	0	7.60781	6.95469	-0.129496	0.533603	6.62001	5.38594	8.60938	0.676711	0	0	0	0	0	0	0	0	0	0
CARS2	NM_024537	NM_024248	65.9574	55.877	47.3118	75	55.9882	51.9685	0	0	0	24	22.7688	-0.0759793	0.0823926	3.23056	24	24	0	0	0	0	0	0	0	0	0	0	0
CASC3	NM_007359	NM_138660	69.6429	57.1292	48.1738	64.4068	55.6818	45.6289	0	0	0	5.04531	4.57969	-0.139694	1.69147	6.49412	4.62422	5.04609	0.125957	0	0	0	0	0	0	0	0	0	0
CASC4	NM_138423,NM_177974	NM_001205369,NM_001205371	80.4255	48.6239	35.6662	69.906	47.0633	33.3333	0	0	1	24	19.6469	-0.288734	-1.24392	NA	24	24	0	0	1	0	1	0	0	0	0	0	0
CASK	NM_001126054,NM_001126055,NM_003688	NM_009806,NM_001284504	77.8947	45.4714	43.7635	69.5652	44.4692	41.8855	0	0	0	24	7.94531	-1.59486	-0.240773	NA	24	NA	NA	0	0	0	0	0	0	0	0	0	0
CASKIN1	NM_020764	NM_027937	77.0053	61.243	56.7792	90.625	69.2737	63.9356	0	0	0	6.02813	6.39219	0.0846005	2.15546	2.88804	5.17031	4.71719	-0.132325	0	0	0	0	0	0	0	0	0	0
CASKIN2	NM_001142643,NM_020753	NM_080643	61.8497	61.6195	55.3483	64.9091	65.4475	59.4628	2	0	1	2.85312	3.85781	0.43524	2.7466	4.76042	2.49805	1.74521	-0.517396	0	0	0	0	0	0	0	0	0	0
CASP2	NM_001224,NM_032982,NM_032983	NM_007610	71.223	52.3915	43.033	44.3182	51.1182	45.9343	1	0	0	4.97891	4.19766	-0.246245	0.800157	1.01811	3.71875	2.88125	-0.368123	0	1	0	1	0	0	1	0	0	0
CASP3	NM_004346,NM_032991	NM_009810,NM_001284409	58.7302	45.0839	39.4265	59.375	39.0887	36.8655	0	0	1	3.6875	1.37666	-1.42147	0.651039	0.497038	4.15547	6.96172	0.744432	0	0	0	0	0	0	0	0	0	0
CASP6	NM_001226,NM_032992	NM_009811	68.4211	52.4669	32.4528	71.7949	45.1247	38.5164	0	0	0	5.68125	3.63398	-0.644656	0.909323	NA	6.9875	24	1.78019	1	0	1	0	0	0	0	0	0	0
CASP7	NM_001227,NM_001267056,NM_001267057,NM_001267058,NM_033338,NM_033339,NM_033340	NM_007611	73.0159	53.3991	42.9143	61.7021	48.4649	37.8378	0	0	0	3.72578	3.33047	-0.161818	0.444386	NA	3.72891	3.96094	0.0870897	0	0	0	0	0	0	0	0	0	1
CASP8	NM_001080124,NM_001080125,NM_001228,NM_033355,NM_033356,NM_033358	NM_009812,NM_001080126	55.7443	47.1933	36.6956	55.5024	44.9306	37.7798	0	0	0	4.09766	3.1293	-0.38896	0.287812	7.54895	4.0125	4.28984	0.0964238	1	1	1	1	0	0	0	0	0	0
CASP9	NM_001229,NM_032996	NM_015733	76.1317	57.6557	48.4928	76.3265	56.195	49.1779	1	1	0	6.09063	4.97969	-0.290535	2.28017	NA	4.95156	3.25234	-0.606404	0	1	0	1	0	1	0	0	0	0
CAST	NM_001042440,NM_001190442,NM_173060,NR_033798	NM_001301156,NM_001301153,NM_009817	58.9041	46.9757	31.295	63.8554	45.5604	33.5593	0	0	0	24	12.3812	-0.954877	-1.7263	3.23245	24	24	0	0	0	0	0	0	0	0	0	0	0
CAT	NM_001752	NM_009804	63.9344	51.7045	41.4553	62.9213	49.2424	32.3764	0	0	0	24	10.3719	-1.21036	-0.193467	NA	19.9531	22.8562	0.195974	0	0	0	0	0	0	0	0	0	0
CAV1	NM_001172895,NM_001172896,NM_001172897,NM_001753	NM_007616	59.1304	50.4655	39.3583	58.5106	49.0991	38.04	1	0	2	10.9437	9.66406	-0.179405	-0.227671	NA	10.0531	24	1.25539	0	0	0	0	0	0	0	0	0	0
CAV2	NM_001206748,NM_001233,NM_198212	NM_016900	75.5682	52.1472	30.7544	82.8729	53.7832	31.9421	3	0	0	6.19375	5.60234	-0.144783	-0.774725	NA	8.40625	24	1.5135	1	0	1	0	0	0	0	0	0	0
CBFA2T2	NM_001032999,NM_001039709,NM_005093	NM_001285446,NM_172860	76.8519	53.1653	45.6418	80.137	53.8031	49.5265	1	0	1	2.43516	3.48125	0.515591	0.989067	2.38294	1.9082	1.88789	-0.0154392	1	1	1	1	0	0	1	1	0	0
CBFB	NM_001755,NM_022845	NM_022309	76.8212	53.7234	34.1101	81.2261	53.7341	32.9746	0	0	2	8.53125	3.62383	-1.23524	-0.427471	NA	9.65625	11.7656	0.285044	0	1	0	1	0	0	0	0	0	0
CBL	NM_005188	NM_007619	79.7468	51.7505	43.4723	80.9859	50.9739	43.4871	6	1	0	5.18594	3.94922	-0.393038	0.605101	0.811536	4.18516	5.37344	0.360564	0	1	0	1	0	0	0	1	0	0
CBLB	NM_170662	NM_001033238	71.5232	50.6922	40.8346	65.528	46.1851	39.1489	0	0	0	2.62812	2.6168	-0.00623188	0.131931	1.57931	3.35664	2.57227	-0.383978	0	0	0	0	0	0	0	0	0	0
CBLL1	NM_024814,NR_024199	NM_134048,NM_001253847	66.6667	49.1192	34.3577	57.8788	47.1545	32.2764	0	0	0	0.335938	9.68125	4.84893	-0.671685	NA	3.01172	7.2125	1.25991	0	0	0	0	0	0	0	0	0	0
CBR1	NM_001757	NM_007620	59.6899	55.1559	40.8759	71.3178	58.5132	36.5248	0	0	0	5.18438	4.60938	-0.169599	-1.24503	3.14654	5.61328	8.35625	0.574011	0	0	0	0	0	0	0	0	0	0
CBS	NM_000071,NM_001178008,NM_001178009	NM_178224,NM_001271353	57.5535	56.2652	54.3221	68.5714	61.8961	50.6531	0	0	0	10.1984	6.07188	-0.748134	1.35261	9.1001	7.15625	11.0625	0.628402	0	0	0	0	0	0	0	1	0	0
CBWD2	NM_172003	NA	NA	NA	NA	69.1011	41.6667	27.115	0	0	0	8.475	24	1.50175	-2.2938	NA	24	24	0	0	0	0	0	0	0	0	1	0	0
CBX1	NM_001127228,NM_006807	NM_007622	66.3793	46.2366	40.1302	71.4777	47.8495	41.4317	0	0	0	7.67188	4.77266	-0.684787	0.535881	1.37952	6.90937	9.19375	0.412098	0	0	0	0	0	0	0	0	0	0
CBX2	NM_005189,NM_032647	NM_007623	84.3537	60.8333	53.2381	86.2069	64.7905	57.8221	1	0	0	1.61406	2.45469	0.604843	2.18117	6.66154	1.17515	0.884375	-0.41011	0	0	0	0	0	0	0	0	0	0
CBX3	NM_007276,NM_016587	NM_007624	72.3849	42.9348	33.4244	66.8874	38.4058	32.2373	0	0	1	8.31094	3.175	-1.38825	-1.55443	1.16452	19.9125	24	0.26936	0	0	0	0	0	0	0	0	0	0
CBX4	NM_003655	NM_007625	79.4118	61.5338	52.8774	88.3436	65.4783	49.4396	1	1	1	1.13359	0.299023	-1.92257	0.582119	7.09092	0.989407	1.08043	0.126972	0	0	0	0	0	0	0	0	0	0
CBX5	NM_001127321,NM_001127322,NM_012117	NM_007626,NM_001076789,NM_001110216	58.4663	43.0556	42.4283	62.0482	41.4931	41.5618	2	2	1	11.1438	5.38359	-1.04959	0.0220846	0.239551	12.8594	11.25	-0.192896	1	1	1	1	1	0	0	0	0	0
CBX6	NM_014292	NM_028763	68.7631	62.6506	53.4525	71.4286	67.5545	61.1394	5	1	0	4.06016	3.3875	-0.261314	2.84711	7.33336	3.28672	2.78086	-0.241118	0	0	0	0	0	0	0	0	0	0
CBX8	NM_020649	NM_013926	63.8655	58.8613	52.6138	63.5593	62.8205	44.186	0	0	1	0.928076	0.296191	-1.64771	-0.338253	2.56108	0.678857	0.814356	0.26255	0	0	0	0	0	0	0	0	0	0
CBY1	NM_001002880,NM_015373	NM_028634	58.7413	53.3854	55.2365	63.2353	52.231	48.8599	2	1	0	8.4625	5.15703	-0.714543	1.30151	26.9184	4.34063	4.10313	-0.0811797	0	0	0	0	0	0	0	0	0	0
CC2D1A	NM_017721	NM_145970	63.913	59.3573	60.8802	73.913	63.1303	67.2165	0	0	0	6.05938	6.67344	0.139261	2.05533	5.87593	4.78281	5.88516	0.299221	0	0	0	0	0	0	0	0	0	0
CC2D1B	NM_032449	NM_177045	72.8477	56.3408	52.7273	71.5232	59.6042	46.9241	1	0	1	4.87422	5.06562	0.0555692	1.75815	3.60866	3.03086	3.90156	0.364325	1	1	1	1	0	0	0	0	0	0
CC2D2A	NM_001080522,NM_001164720,NM_020785	NM_172274	46.8677	48.2048	20.339	48.1633	52.0325	43.7678	2	0	0	5.6375	4.86719	-0.211967	-0.224186	NA	24	24	0	1	0	1	0	0	0	0	0	1	0
CCAR1	NM_018237	NM_026201	59.4059	43.4757	33.7725	47.8992	41.7318	26.2238	0	0	0	8.98125	4.79141	-0.906467	-2.44419	2.87272	8.18125	12.4094	0.601038	0	0	0	0	0	0	0	0	0	0
CCBL1	NM_001122671,NM_001122672,NM_004059	NM_172404	57.4074	55.0588	54.4236	65.4054	57.2104	52.6539	0	0	0	24	24	0	0.98237	NA	15.2656	5.83359	-1.38783	0	0	0	0	0	0	0	0	0	0
CCDC101	NM_138414	NM_029339	61.2565	55.2154	48.1172	57.2973	58.39	60.7143	0	0	0	3.68984	10.4219	1.49798	-0.58149	1.93334	3.91484	2.65313	-0.561262	0	0	0	0	0	0	0	0	0	0
CCDC104	NM_080667	NM_025740	62.8571	43.6047	34.6591	64.1414	41.4966	22.2222	0	0	0	24	6.52656	-1.87864	-3.00336	0.447057	24	24	0	0	0	0	0	0	0	0	0	0	0
CCDC106	NM_013301	NM_001290432,NM_146178	56.713	57.5	58.7786	65.5782	63.3452	68.3575	1	0	0	6.51094	4.45937	-0.546024	0.632319	NA	5.575	4.71953	-0.240328	0	0	0	0	0	0	0	0	0	0
CCDC107	NM_001195200,NM_001195201,NM_001195217,NM_174923	NM_001037913	73.913	58.1619	42.1053	78.8889	60.9598	44.3038	0	0	0	4.24492	7.17812	0.757869	-0.778116	NA	1.14502	5.20469	2.18444	0	0	0	0	0	0	0	0	0	0
CCDC115	NM_032357	NM_027159	58.3832	60.4052	44.2029	57.5893	64.6409	43.4436	0	0	0	8.85781	8.45156	-0.0677324	1.99402	1.19999	6.2875	5.34609	-0.234001	0	0	0	0	0	0	0	1	0	0
CCDC117	NM_173510	NM_134033	65.1163	57.0743	43.0054	71.5909	51.4286	37.1842	0	0	1	0.748437	0.441382	-0.761855	0.286517	NA	3.01953	1.7876	-0.756302	0	1	0	1	0	0	0	0	0	0
CCDC12	NM_144716	NM_028312	61.6667	60.8782	50.1946	59.434	59.2593	51.8987	0	0	3	3.35703	4.25703	0.342662	-1.11739	4.54547	2.70938	3.99688	0.560912	0	0	0	0	0	0	0	0	0	0
CCDC124	NM_001136203,NM_138442	NM_026964	74.4186	61.9266	60.2804	75.5556	64.4345	68.5185	0	0	0	10.9625	24	1.13046	-0.830752	9.45465	24	24	0	0	0	0	0	0	0	0	0	0	0
CCDC125	NM_176816	NM_183115	58.0052	46.3074	42.0219	41.8605	40.2344	42.6608	1	0	0	5.08203	4.125	-0.301011	0.155778	0.271286	3.82852	5.55625	0.537326	1	1	1	1	0	0	0	0	0	0
CCDC127	NM_145265	NM_024201,NM_001168659	65.4545	45.8493	44.9573	70	48.2759	43.5754	0	0	0	1.42129	3.05547	1.10419	-0.0756264	1.7	1.90234	2.27227	0.256354	0	0	0	0	0	0	0	0	0	0
CCDC130	NM_030818	NM_026350	54.1818	55.0086	50.1458	62.212	61.8808	60.7143	1	0	0	2.07519	8.05937	1.95742	0.305505	3.05529	1.33198	1.50674	0.177854	0	0	0	0	0	0	0	0	0	0
CCDC132	NM_001257998,NM_017667,NM_024553	NM_024260	56.0284	43.4888	33.0224	56.25	38.8256	33.7551	1	0	0	7.46406	4.7375	-0.655835	-0.605819	NA	5.42656	24	2.14492	0	0	0	0	0	0	0	0	0	0
CCDC134	NM_024821	NM_172428	67.3611	54.7826	53.1844	57.7982	55.0725	62.395	0	0	0	4.65234	7.01562	0.592614	1.10701	5.62857	2.88477	3.54375	0.296823	0	0	0	0	0	0	0	0	0	0
CCDC137	NM_199287	NM_152807	66.6667	57.2738	48.6933	69.4444	61.2644	57.7371	0	0	0	3.00781	4.27891	0.508527	1.47662	9.06701	1.89414	1.65527	-0.194475	1	0	1	0	0	0	0	0	0	1
CCDC138	NM_144978	NM_001162956	NA	43.4655	29.8969	63.3333	37.988	23.913	0	0	0	5.35938	5.4375	0.0208787	-1.71005	NA	6.8375	11.85	0.793346	0	0	0	0	0	0	0	0	0	0
CCDC142	NM_032779	NM_001081266	68.6567	62.968	NA	59.0331	62.5896	50.3501	5	0	0	2.28672	2.85625	0.320843	1.82468	3.47734	1.08304	1.37769	0.347155	1	0	1	0	0	0	0	0	0	0
CCDC167	NM_138493	NM_026782	54.0541	53.0612	53.3849	60.6557	54.0816	59.2453	0	0	0	10.9563	20.3875	0.895931	-0.630509	0.253149	24	24	0	0	0	0	0	0	0	0	0	0	0
CCDC22	NM_014008	NM_138603	56.6964	57.6964	50.6122	64.1176	62.2611	60	0	0	0	11.5406	8.49375	-0.442248	0.0175479	2.19611	7.59063	8.0625	0.0870086	0	0	0	0	0	0	0	0	0	0
CCDC23	NM_199342	NM_024462	74.1935	50.7463	44.127	71.4894	46.2687	36.4641	1	0	0	4.86562	2.83906	-0.77721	-2.29127	NA	24	24	0	0	0	0	0	0	0	0	0	0	0
CCDC25	NM_018246	NM_145944	61.9355	41.9458	44.6367	69.0265	40.8293	40.8621	1	1	2	9.00781	7.87812	-0.193325	-0.581637	2.3889	11.3187	23.8562	1.07565	0	0	0	0	0	0	0	0	0	0
CCDC28A	NM_015439	NM_144820	52.4064	50.4505	52.2321	55.4839	49.2121	38.5659	0	0	0	8.13438	4.20312	-0.952569	0.865846	NA	9.51406	7.76875	-0.292379	0	0	0	0	0	0	0	0	0	0
CCDC28B	NM_024296	NM_025455	51.2658	56.3847	48.3051	63.6364	60.0332	57.7465	0	0	0	9.55625	8.97969	-0.0897793	-1.15122	2.54718	17.4812	24	0.457226	0	0	0	0	0	0	0	0	0	0
CCDC3	NM_031455	NM_028804	79.7468	60.219	46.3905	85.0746	63.5916	50.3629	3	3	0	15.7719	13.9187	-0.180325	2.07985	NA	12.2422	24	0.971173	0	0	0	0	0	0	0	0	0	0
CCDC34	NM_030771,NM_080654	NM_026613	68.6275	48.3696	32.8962	72.2222	45.6328	28.3388	0	0	0	8.625	6.10156	-0.499346	-3.59434	5.70481	12.6531	20.5	0.69613	0	0	0	0	0	0	0	0	0	0
CCDC43	NM_001099225,NM_144609	NM_025918	77.027	53.8117	38.5705	68.1818	51.7037	36.0113	1	0	2	5.48438	4.77266	-0.200535	-1.08338	4.04142	6.14062	8.2375	0.423821	0	0	0	0	0	0	1	0	0	0
CCDC47	NM_020198	NM_026009	57.277	44.5592	40.873	66.9643	43.3196	35.0705	1	0	0	11.5078	6.16563	-0.900294	-1.10403	0.908572	9.70937	15.8781	0.709591	0	0	0	0	0	0	0	0	0	0
CCDC50	NM_174908,NM_178335	NM_001289436,NM_026202	77.2727	47.6035	38.3465	70.339	46.3626	35.1085	3	1	2	6.33203	5.64062	-0.166813	-0.815316	NA	7.25	11.0375	0.606361	0	1	0	1	0	0	0	0	0	0
CCDC51	NM_001256964,NM_001256965,NM_001256966,NM_001256967,NM_001256968,NM_001256969,NM_024661	NM_025689	56.6265	56.6749	37.3874	62.5	57.6861	42.437	0	0	0	3.17656	3.03437	-0.0660672	0.187972	0.916333	2.27891	1.93203	-0.238223	0	0	0	0	0	0	0	0	0	0
CCDC57	NM_198082	NM_027745	66.6667	55.49	51.3369	78.3784	59.0611	66.5094	1	1	0	4.36484	5.89062	0.432491	-0.146117	14.4666	3.04531	3.90508	0.358761	0	0	0	0	0	0	0	0	0	0
CCDC58	NM_001017928	NM_198645	59.4848	43.908	40.1709	0	42.069	30.7143	0	0	0	9.73906	5.16406	-0.915276	-3.66451	0.866665	24	24	0	0	0	0	0	0	0	0	0	0	0
CCDC59	NM_014167,NR_033192	NM_025602	68.2759	48.9627	36.7939	61.3636	42.1488	33.294	0	0	0	4.30312	3.89648	-0.143212	-3.71577	3.0838	24	24	0	0	0	0	0	0	0	0	0	1	0
CCDC6	NM_005436	NM_001111121	88.8268	58.5816	45.844	71.9828	51.9298	37.6829	2	0	1	9.75	8.89687	-0.132104	0.18178	NA	10.3281	13.875	0.425909	0	0	0	0	0	0	0	0	0	0
CCDC77	NM_001130146,NM_001130147,NM_001130148,NM_032358	NM_026028	51.2605	47.3469	43.5847	59.4872	42.8155	41.8056	0	0	1	1.72246	1.2269	-0.489449	-0.866766	2.03484	2.45977	3.49609	0.507223	0	0	0	0	0	0	0	0	0	0
CCDC78	NM_001031737	NM_001165929	50	56.0122	48.505	67.9245	63.5535	63.2979	1	0	0	3.21641	5.22656	0.700413	0.875269	2.25512	0.141382	1.975	3.80418	0	0	0	0	0	0	0	0	0	0
CCDC80	NM_199511,NM_199512	NM_026439	52.0833	52.4912	31.8841	41.7431	52.9618	35.3216	0	0	0	13.025	10.6062	-0.296369	-1.84918	NA	15.675	24	0.614569	0	0	0	0	0	0	0	0	0	0
CCDC84	NM_198489	NM_201372	73.3333	54.5546	41.6667	71.4286	54.4545	31.9728	0	0	0	9.97188	8.17344	-0.286922	-1.3912	NA	8.3	11.5641	0.478465	0	0	0	0	0	0	0	0	0	0
CCDC85B	NM_006848	NM_198616	NA	69.4581	NA	71.5789	71.757	67.4897	0	0	0	8.05937	7.14375	-0.173986	0.317214	0.699999	24	3.35078	-2.84047	0	0	0	0	0	0	0	0	0	0
CCDC85C	NM_001144995	NM_001159910	83.4507	68.6461	NA	85.3828	70.7937	56.2312	5	2	1	4.21719	3.75156	-0.16879	3.20581	4.08222	3.2043	2.40742	-0.412519	1	0	0	0	1	0	1	0	0	0
CCDC86	NM_024098	NM_023731	57.5758	60.6557	48.6086	68.6391	62.8809	55.308	1	0	0	5.18125	5.98281	0.207524	2.42513	2.90292	5.825	6.47578	0.152796	0	0	0	0	0	0	0	1	0	0
CCDC88A	NM_001135597,NM_001254943,NM_018084	NM_176841	67.6812	38.9852	32.4333	58.9074	37.912	32.6683	2	0	1	6.59219	6.13438	-0.103841	-2.20492	0.643253	5.75625	14.725	1.35507	1	0	0	0	0	0	0	0	0	0
CCDC88C	NM_001080414	NM_026681	82.2368	58.2421	53.6364	82.4675	60.2596	49.8464	3	3	0	4.70312	7.07188	0.588473	1.00976	2.29219	2.98906	3.43984	0.20265	0	0	0	0	0	0	0	0	0	0
CCDC9	NM_015603	NM_172297	46.3327	60.7951	52.973	66.1836	64.7243	65.0909	1	0	0	3.86875	8.76562	1.17999	0.374341	3.49417	2.3375	1.59121	-0.554841	0	0	0	0	0	0	0	0	0	0
CCDC90A	NM_001031713	NM_001081059	80	57.3803	44.5432	74.0458	55.2778	40.7512	2	0	0	11.8313	5.43125	-1.12325	-0.42482	0.482062	5.65781	7.62656	0.430789	1	1	1	1	0	0	0	0	0	0
CCDC90B	NM_021825	NM_025515	54.7804	43.1907	32.8767	59.9448	39.8693	33.7029	0	0	0	4.92891	5.47813	0.152415	-0.523848	NA	10.3625	24	1.21166	0	0	0	0	0	0	0	0	0	0
CCDC93	NM_019044	NM_001025156	61.6766	50.582	47.0385	72.619	45.9916	45.3237	0	0	0	2.0707	3.42969	0.727957	0.582812	4.03764	2.2582	2.44219	0.112999	0	0	0	0	0	0	1	1	0	0
CCDC94	NM_018074	NM_028381	56.8627	57.9894	59.3651	54.5455	61.1111	61.4796	0	0	0	3.8375	12.0375	1.6493	1.30036	7.08935	2.80469	2.31055	-0.279606	0	0	0	0	0	0	0	0	0	0
CCDC97	NM_052848	NM_028771	57.377	60.7038	57.0217	66.3934	63.0814	57.8875	1	0	0	3.15313	4.38984	0.477387	2.26505	11.2728	2.18535	1.70352	-0.35935	0	1	0	0	0	1	0	0	0	0
CCHCR1	NM_001105563,NM_001105564,NM_019052	NM_146248	58.011	59.6628	57.4074	61.7886	60.9621	58.1699	3	3	0	5.625	7.7	0.453005	0.919485	1.94781	4.39609	7.39219	0.749779	0	0	0	0	0	0	0	0	0	0
CCM2	NM_001029835,NM_001167934,NM_001167935,NM_031443,NR_030770	NM_146014,NM_001190343	84.9558	54.9192	56.658	86.9863	58.3979	61.7433	0	0	0	4.33672	4.77813	0.139841	0.99602	5.26509	3.12969	4.96328	0.665275	0	0	0	0	0	0	0	0	0	0
CCNA2	NM_001237	NM_009828	72.4771	48.9362	37.2807	68.1967	45.9584	31.3233	0	0	0	4.52109	2.98906	-0.596979	-0.539824	NA	5.19766	5.69453	0.131716	0	0	0	0	0	0	0	0	0	0
CCNB1	NM_031966	NM_172301	59.5238	47.8732	36.965	62.8458	44.47	32.3529	1	1	1	6.31094	3.15547	-1	-1.30609	0.572727	9.08281	9.42656	0.0535927	0	0	0	0	0	0	0	1	0	0
CCNB1IP1	NM_021178,NM_182849,NM_182852	NM_001111119	56.6372	45.2467	35.1064	43.5986	44.7242	47.2527	0	0	0	14.1625	24	0.760958	0.503555	2.73824	8.46562	10.55	0.317555	1	0	1	0	0	0	0	0	0	0
CCNB2	NM_004701	NM_007630	71.9298	50.0418	33.0435	65.7609	43.609	39.881	1	1	1	13.3906	4.94375	-1.43755	-2.62476	0.226103	17.8813	23.1187	0.370616	0	0	0	0	0	0	0	0	0	0
CCNC	NM_001013399,NM_005190	NM_016746	60.7595	39.4366	31.6348	63.7631	38.0282	30.7363	1	0	0	23.2688	7.49375	-1.63463	0.304342	NA	24	24	0	0	0	0	0	0	0	0	0	0	0
CCND1	NM_053056	NM_007631	68.1818	58.4459	47.3094	67.9426	61.1486	46.2093	0	0	0	3.55977	3.61016	0.0202788	0.675416	NA	2.64414	3.25078	0.297987	0	0	0	0	0	0	0	0	0	0
CCND3	NM_001136017,NM_001136125,NM_001136126,NM_001760	NM_007632,NM_001081636,NM_001081635	63.6245	61.661	55.2261	80.6061	63.0262	53.9225	2	2	0	11.5687	15.2812	0.40153	2.41907	NA	8.925	6.5875	-0.438121	0	0	0	0	0	0	0	0	0	0
CCNDBP1	NM_012142,NR_027513,NR_027514,NR_045998,NR_045999	NM_010761	57.9439	50.6069	38.6189	70.9957	49.3998	38.0993	0	0	1	12.6797	13.9437	0.137099	-0.656781	0.363222	7.7	24	1.6401	0	1	0	1	0	0	0	0	1	0
CCNE1	NM_001238	NM_007633	74.3802	48.8998	51.6008	82.5137	48.4185	48.7759	0	0	0	2.87305	11.5453	2.00665	0.862475	2.99744	3.04922	4.70781	0.626617	0	0	0	0	0	0	0	0	0	0
CCNF	NM_001761	NM_007634	75.7576	54.97	50.7508	85.2273	58.9157	54.5702	5	2	0	2.19961	3.41172	0.633252	2.99159	4.60506	2.03613	1.64522	-0.307556	1	1	0	1	1	0	0	0	0	0
CCNG1	NM_004060,NM_199246	NM_009831	65.5949	43.3898	36.4421	66.6667	39.8649	32.2437	1	0	0	10.9359	6.05938	-0.851836	0.133592	0.272583	18.4812	14.9281	-0.308029	0	0	0	0	0	0	0	0	0	0
CCNH	NM_001199189,NM_001239	NM_023243	72.6562	43.0041	29.6296	61.9247	42.3868	26.087	0	0	0	5.63906	3.82578	-0.559701	-3.02372	0.177329	8.42031	21.7406	1.36845	0	0	0	0	0	0	0	0	0	0
CCNI	NM_006835	NM_017367	69.4888	46.8254	36.59	66.5441	44.7972	34.359	0	0	0	24	24	0	-1.02943	2.02222	24	24	0	0	0	0	0	0	0	0	0	0	0
CCNK	NM_001099402	NM_009832	53.1818	55.1744	48.1763	50	55.7085	40.2456	2	0	1	6.58125	5.77969	-0.18737	-1.06649	0.36753	7.67188	8.09844	0.0780645	0	0	0	0	0	0	0	0	0	0
CCNL1	NM_020307	NM_019937	70.2479	50.2189	31.1804	60.2671	47.4383	31.0811	0	0	0	1.06954	2.4625	1.20313	-1.29952	4.21074	1.33936	1.34683	0.00802508	0	0	0	0	0	0	0	0	0	0
CCNL2	NM_001039577,NM_030937	NM_207678	66.6667	55.0417	43.7352	62.5	58.1574	52.3026	2	1	2	1.57344	3.55391	1.17549	-0.250596	2.78571	1.54717	2.31953	0.584203	0	0	0	0	0	0	0	0	0	1
CCNT1	NM_001240	NM_009833	NA	49.8851	NA	56.9659	46.5841	37.1803	1	0	0	0.304004	1.8459	2.60216	-0.0307244	1.66667	1.86445	1.52471	-0.29022	0	0	0	0	0	0	0	0	0	0
CCNY	NM_145012,NM_181698	NM_026484	75.3653	49.3177	39.6497	83.3333	50.0975	38.3776	1	0	2	8.86719	5.78281	-0.616705	1.21682	0.0726415	12.0719	21.2375	0.814964	0	0	0	0	0	0	0	0	0	0
CCNYL1	NM_001142300,NM_152523	NM_001097644	69.5652	42.2374	43.2784	74.7899	47.4649	37.9951	1	0	0	7.88281	5.125	-0.621159	0.282699	NA	7.34063	9.74375	0.408574	1	1	1	1	0	0	0	0	0	0
CCPG1	NM_001204450,NM_001204451,NM_004748,NM_020739	NM_001114328,NM_001286546	62.8571	47.2149	32.1678	69.2308	38.6139	32.6981	0	0	0	13.3531	7.33125	-0.865047	-2.36847	2.11897	24	24	0	0	1	0	1	0	0	0	1	0	0
CCRN4L	NM_012118	NM_009834	72.1461	58.8372	37.1403	76.1658	54.1667	44.1113	0	0	0	1.02068	2.01328	0.980024	0.767328	NA	1.44546	1.71406	0.245892	0	1	0	1	0	0	0	0	0	0
CCS	NM_005125	NM_016892	58.6207	57.5758	46.8966	67.4419	62.0606	55.4878	0	0	0	9.15938	14.8406	0.696231	-0.772205	1.86667	24	24	0	0	0	0	0	0	0	0	0	0	0
CCT2	NM_001198842,NM_006431	NM_007636	66.0377	47.699	35.4839	62.766	43.2836	33.7302	0	0	0	13.8219	5.41953	-1.35071	-1.31795	0.759844	17.3531	15.3938	-0.172851	0	0	0	0	0	0	0	0	0	0
CCT3	NM_001008800,NM_005998,NR_036564,NR_036565	NM_009836	58.3333	48.9621	47.032	57.5758	50.3663	46.6387	0	0	0	16.4219	7.62344	-1.10711	-0.105747	2.13532	24	17.9906	-0.415789	0	0	0	0	0	0	0	0	0	0
CCT4	NM_001256721,NM_006430	NM_009837	68.0851	44.7531	37.3609	65.2439	44.1358	34.8673	0	0	0	17.4688	6.13281	-1.51016	-0.714603	0.288236	24	16.475	-0.542756	0	0	0	0	0	0	0	0	1	0
CCT5	NM_012073	NM_007637	61.2676	49.8155	46.0938	55.5556	47.7245	40.66	0	0	0	23.0625	11.125	-1.05174	-0.971095	2.87778	24	24	0	0	1	0	0	0	1	0	0	0	0
CCT6A	NM_001009186,NM_001762	NA	NA	NA	NA	71.3415	44.9875	35.9513	0	0	0	12.2172	6.32812	-0.949062	-0.408864	2.95963	17.775	23.3125	0.391254	0	0	0	0	0	0	0	1	0	0
CCT7	NM_001009570,NM_001166284,NM_001166285,NM_006429,NR_029402,NR_029403	NM_007638	64.1815	51.4985	43.5	58.7413	51.4706	44.7205	0	0	0	24	20.1938	-0.249126	-0.646827	0.81465	24	24	0	0	0	0	0	0	0	0	0	0	0
CCT8	NM_006585	NM_009840	74.1176	44.748	35.8006	68.6869	41.6515	29.7297	0	0	0	24	8.52656	-1.493	-1.53241	0.189011	24	24	0	0	0	0	0	0	0	0	0	0	0
CD109	NM_001159587,NM_001159588,NM_133493	NM_153098	63.0952	43.6359	43.7657	58.8235	40.5947	36.2297	5	2	2	24	24	0	-0.36316	NA	16.9406	24	0.502547	1	0	1	0	0	0	0	0	0	0
CD151	NM_001039490,NM_004357,NM_139029,NM_139030	NM_009842,NM_001111049,NM_001111050	57.8628	54.3307	52.9412	78.0488	58.7927	62.3639	0	0	0	24	24	0	1.94708	4.56767	24	24	0	0	0	0	0	0	0	1	0	0	0
CD164	NM_001142401,NM_001142402,NM_001142403,NM_001142404,NM_006016	NM_016898	72.7273	51.5152	37.2904	69.0608	49.9069	32.178	0	0	1	7.65	5.06875	-0.59383	-0.673534	1.24011	13.9187	24	0.786005	0	0	0	0	0	0	1	0	0	0
CD24	NM_013230	NA	NA	NA	NA	74.5455	54.321	37.8763	0	0	2	12.4734	5.90469	-1.07893	-0.0921589	NA	13.2438	24	0.857723	0	1	0	1	0	0	0	0	0	0
CD276	NM_001024736,NM_025240	NM_133983	67.9739	59.6215	51.2027	78.6325	63.8629	54.7375	2	2	0	19.2625	11.9781	-0.685392	2.29022	0.998105	10.9344	7.76875	-0.493117	0	0	0	0	0	0	0	1	0	0
CD2AP	NM_012120	NM_009847	79.6296	42.9467	35.1495	72.807	40.3646	29.4758	0	0	2	5.19453	3.00625	-0.789029	-0.67216	0.621951	5.91719	11.3625	0.941297	0	0	0	0	0	0	0	0	0	0
CD2BP2	NM_001243646,NM_006110	NM_001285907,NM_001285906,NM_027353,NM_001285905	57.8947	55.9767	50.1389	61.9318	58.9669	55.881	2	2	0	2.90859	2.95312	0.0219205	1.72538	27.9113	1.3207	1.86992	0.501672	0	0	0	0	0	0	0	0	1	0
CD320	NM_001165895,NM_016579	NM_019421	66.25	56.0664	47.8455	72.7273	65.4888	62.5	0	0	0	24	24	0	0.962911	9.65194	24	24	0	0	0	0	0	0	0	0	0	0	0
CD36	NM_000072,NM_001001547,NM_001001548,NM_001127443,NM_001127444	NM_007643,NM_001159555,NM_001159556,NM_001159557,NM_001159558	43.2905	41.4376	34.8193	38.8889	39.4644	36.0055	1	0	0	24	24	0	-1.05433	NA	24	24	0	1	0	1	0	0	0	0	0	0	0
CD3EAP	NM_012099	NM_145822	72.2222	56.5	46.9697	54.3033	59.3607	48.6957	1	0	0	2.52031	2.60684	0.0486969	0.785804	NA	1.15459	1.58662	0.458577	0	1	0	1	0	0	0	1	0	0
CD44	NM_000610,NM_001001389,NM_001001390,NM_001001391,NM_001001392,NM_001202555,NM_001202556,NM_001202557	NM_009851	57.3477	48.997	39.8396	66.5899	50.8287	39.9153	4	2	0	20.3938	24	0.234907	0.986962	NA	22.425	24	0.0979264	0	0	0	0	0	0	0	0	0	0
CD46	NM_002389,NM_153826,NM_172350,NM_172351,NM_172352,NM_172353,NM_172359,NM_172361	NM_010778	45.8333	41.1658	37.7984	63.4286	42.7027	33.3506	0	0	0	8.88125	8.6875	-0.0318217	0.572351	1.09723	6.77891	19.8531	1.55024	0	0	0	0	0	0	0	0	0	0
CD47	NM_001777,NM_198793	NM_010581	79.2899	44.7179	40.4307	81.1111	39.2157	35.3938	1	0	2	24	8.37187	-1.51941	-1.22136	NA	24	24	0	0	0	0	0	0	0	0	0	0	0
CD55	NM_000574,NM_001114752	NA	NA	NA	NA	65.9864	46.8586	30.531	1	0	0	20.8125	8.48125	-1.2951	-0.520374	NA	24	24	0	0	0	0	0	0	0	0	0	0	0
CD58	NM_001144822,NM_001779,NR_026665	NA	NA	NA	NA	74.3802	39.3094	29.3907	0	0	3	5.99375	6.79531	0.181081	-2.30988	0.359332	15.6	24	0.621488	0	0	0	0	0	0	0	0	0	0
CD59	NM_000611,NM_001127223,NM_001127225,NM_001127226,NM_001127227,NM_203329,NM_203330,NM_203331	NA	NA	NA	NA	68.1034	47.5452	44.955	2	0	3	11.0422	12.5078	0.179803	0.661822	NA	10.1547	14.475	0.511417	1	1	0	0	1	1	0	0	0	1
CD63	NM_001257389,NM_001257390,NM_001257391,NM_001257392,NM_001257400,NM_001257401,NM_001267698,NM_001780	NM_007653,NM_001042580,NM_001282966	60.5836	49.2329	43.4211	78.6802	51.6039	44.9153	0	0	0	24	24	0	-2.95334	1.12268	24	24	0	0	0	0	0	0	0	0	0	0	0
CD68	NM_001040059,NM_001251	NM_009853	NA	54.0675	NA	52.6316	57.9268	52.3333	0	0	0	24	24	0	0.142915	NA	24	24	0	1	0	1	0	0	0	0	0	0	0
CD81	NM_004356	NM_133655	66.0305	52.602	45.5357	87.9828	57.2433	58.2278	2	1	1	24	24	0	0.541543	0.900001	24	24	0	0	0	0	0	0	0	0	0	0	0
CD82	NM_001024844,NM_002231	NM_001271432,NM_007656,NM_001271461,NM_001271431,NM_001136055,NM_001271430,NM_001271462	58.4975	53.6829	55.521	69.7581	58.9552	59.6244	1	1	0	12.375	24	0.955606	2.28336	NA	10.775	13.8625	0.3635	1	0	1	0	0	0	0	0	0	0
CD83	NM_001040280,NM_001251901,NM_004233	NM_001289915,NM_009856	78.5047	56.3452	45.2595	59.2391	48.5261	42.8316	0	0	0	4.04336	3.73125	-0.115895	1.48213	NA	3.14883	4.18516	0.410466	1	0	0	0	1	0	1	0	0	0
CD9	NM_001769	NM_007657	59.8684	51.2482	31.3924	66.8478	51.0917	30.0226	0	0	1	24	10.5656	-1.18366	-2.91386	NA	24	24	0	0	0	0	0	0	0	0	0	0	0
CD97	NM_001025160,NM_001784,NM_078481	NM_011925	75	53.3985	52.2505	60	58.0686	57.4503	0	0	0	15.2063	11.0906	-0.455323	1.94981	NA	9.6	7.60625	-0.335849	0	0	0	0	0	0	0	0	0	0
CD99L2	NM_001184808,NM_001242614,NM_031462,NM_134445,NM_134446	NM_001199349	70.1149	51.2605	48.8	78.9474	55.1331	55.1149	2	0	0	9.01094	24	1.41329	3.07699	8.7389	6.90313	5.225	-0.401819	0	0	0	0	0	0	0	0	0	0
CDA	NM_001785	NM_028176	67.3469	59.4104	52.809	65.3631	56.4626	54.2773	1	1	0	24	24	0	-0.754967	NA	24	24	0	0	0	0	0	0	0	0	0	0	0
CDAN1	NM_138477	NM_026891	75	57.6613	44.3353	84.6154	61.2649	49.8385	0	0	0	3.3793	5.44453	0.688085	2.42102	NA	2.06328	2.47187	0.260665	1	0	1	0	0	0	0	0	0	0
CDC123	NM_006023	NM_133837	57.0312	45.9941	47.8571	55.6338	43.9169	46.2451	1	1	0	13.3281	8.21094	-0.698855	-1.60905	0.511109	24	22.7875	-0.0747917	0	0	0	0	0	0	0	0	0	0
CDC16	NM_001078645,NM_003903	NM_027276	79.3893	46.0011	43.9739	79.2929	41.9753	44.8276	0	0	0	6.76562	7.96563	0.235564	-0.222611	NA	7.40469	10.5531	0.51116	0	0	0	0	0	0	0	0	0	0
CDC20	NM_001255	NM_023223	64.5022	55.5333	24.1935	69.3069	57.4667	30.137	0	0	0	8.12031	4.45781	-0.865199	-0.707604	3.14809	6.73125	6.30625	-0.0940921	0	0	0	0	0	0	0	0	0	0
CDC23	NM_004661	NM_178347	67.8571	49.5541	44.8723	58.0645	46.0424	38.9474	0	0	0	6.15	3.82812	-0.683948	1.32758	2.26523	6.825	8.15312	0.256524	0	0	0	0	0	0	0	0	0	0
CDC25A	NM_001789,NM_201567	NM_007658	68.6131	50.7443	48.5321	73.9011	50.5397	47.8778	2	0	0	1.68906	2.25312	0.415704	1.55616	3.27036	2.02715	1.74424	-0.216855	0	0	0	0	0	0	0	0	0	0
CDC25B	NM_004358,NM_021872,NM_021873	NM_023117	63.7931	55.2282	50.5329	66.9666	60.241	53.8595	3	1	0	7.10313	5.33906	-0.411867	1.89742	2.18341	5.09063	4.64531	-0.132067	0	0	0	0	0	0	0	0	0	0
CDC25C	NM_001790,NM_022809	NM_009860	46.1756	48.7351	45.9016	50.9225	46.0619	45.2607	1	0	0	4.49375	4.2125	-0.0932432	0.0940142	NA	4.23516	5.30312	0.324428	0	0	0	0	0	0	0	0	0	0
CDC26	NM_139286	NM_139291	51.1706	49.6124	40.8397	49.5822	44.9612	36.3636	0	0	0	11.5219	5.375	-1.10004	-1.35638	NA	24	24	0	0	0	0	0	0	0	0	0	0	0
CDC27	NM_001114091,NM_001256	NM_001285989,NM_145436	65.9574	41.5254	37.5394	67.7165	39.798	34.0803	1	0	0	6.50547	3.68125	-0.821457	-0.121214	0.976619	7.3	9.81875	0.427643	0	0	0	0	0	0	0	0	0	0
CDC34	NM_004359	NM_177613	85.3881	60.8757	54.6269	84.9246	62.5879	62.243	1	0	0	4.99531	5.8	0.215478	2.30608	8.8926	4.44688	4.28359	-0.0539701	0	0	0	0	0	0	0	0	0	0
CDC37	NM_007065	NM_016742	77.551	56.7544	50.1184	77.5862	59.1029	59.8086	1	1	0	24	17.925	-0.421061	0.942463	7.88749	24	24	0	0	0	0	0	0	0	0	0	0	0
CDC37L1	NM_017913	NM_025950	77.2727	46.7262	39.9317	68.8119	42.2091	33.61	0	0	0	0.353369	1.81269	2.35889	-1.22149	NA	1.31318	1.38633	0.0781996	0	0	0	0	0	0	0	0	0	0
CDC40	NM_015891	NM_027879	58.8235	46.3218	40.2447	54.1667	42.069	35.5364	1	0	0	4.08281	3.13359	-0.381745	-0.755887	NA	3.7625	6.13281	0.704857	1	0	1	0	0	0	0	0	0	0
CDC42	NM_001039802,NM_001791,NM_044472	NM_009861	56.8	44.6181	40.4407	57.8313	43.9236	38.5694	0	0	0	16.9187	5.9125	-1.51678	-0.0465951	0.143925	24	24	0	0	0	0	0	0	0	0	0	0	0
CDC42BPA	NM_003607,NM_014826	NM_001033285	33.7143	44.7586	46.9305	46.7656	41.4922	43.97	2	2	1	7.06406	4.89531	-0.529097	-0.369758	2.97275	5.17031	7.83906	0.60043	0	0	0	0	0	0	0	0	0	0
CDC42BPB	NM_006035	NM_183016	80.7606	55.6204	57.3074	81.4655	54.1472	55.0638	1	1	1	8.20156	8.51094	0.0534193	1.42896	11.4231	7.84219	11	0.488175	0	0	0	0	0	0	0	0	0	0
CDC42EP1	NM_152243	NM_027219	61.8768	61.1382	57.5695	69.4789	67.0068	62.9503	0	0	0	4.47187	5.38594	0.268318	1.33736	3.78334	2.15527	2.00547	-0.103931	0	0	0	0	0	0	0	0	0	0
CDC42EP2	NM_006779	NM_026772	51.4825	58.1395	53.0526	60.5691	63.1912	60.9131	1	1	0	1.41885	3.51133	1.3073	0.978387	2.25431	0.887244	1.05394	0.248395	0	0	0	0	0	0	0	0	0	0
CDC42EP4	NM_012121	NM_020006,NM_001163346	65.1873	62	53.7883	69.6429	65.6396	52.8239	2	0	0	1.61543	2.03555	0.333498	2.74102	2.53586	1.63242	1.21665	-0.4241	0	0	0	0	0	0	0	0	0	0
CDC42SE1	NM_001038707,NM_020239	NM_172395,NM_001038708	62.5004	54.7325	53.7082	61.0599	51.25	44.7956	3	0	0	2.71016	2.15352	-0.331682	0.900111	3.09153	1.96953	2.66426	0.435882	0	0	0	0	0	0	0	0	0	0
CDC42SE2	NM_001038702,NM_020240	NM_178626	54.4423	52.1569	45.6893	49.3464	48.2353	36.7874	2	0	1	4.92422	2.14668	-1.19779	0.253203	0.562745	4.65703	5.29453	0.185092	0	0	0	0	0	0	0	0	0	0
CDC45	NM_001178010,NM_001178011,NM_003504	NM_009862	47.2843	50.9112	32.5581	72.3684	52.1458	31.5789	0	0	0	14.3094	8.35469	-0.776303	-0.778565	4.83343	8.7125	11.9688	0.458114	0	0	0	0	0	0	0	0	0	0
CDC5L	NM_001253	NM_152810	63.2353	46.1187	40.9091	55.4839	42.8809	34.8505	1	0	1	4.88125	3.66641	-0.412884	-1.70217	2.90291	5.8875	6.68281	0.1828	1	1	1	1	0	0	0	1	0	0
CDC6	NM_001254	NM_001025779	57.2165	50.6809	48.0044	62.8571	44.6227	40.7759	0	0	0	3.68125	3.33008	-0.14464	-0.527787	1.27143	3.55586	3.575	0.00774512	0	1	0	1	0	0	0	0	0	0
CDC7	NM_001134419,NM_001134420,NM_003503	NM_009863,NM_001271566	64.7217	46.8437	39.3869	56.4885	40.8696	32.5809	1	0	1	3.96563	4.50156	0.182878	-1.29849	0.450418	4.36719	4.20703	-0.0539022	0	0	0	0	0	0	0	0	0	0
CDC73	NM_024529	NM_145991	78.4387	44.2356	34.4409	72.8395	43.985	29.0244	0	0	0	4.96328	3.73984	-0.408316	-1.76975	NA	6.73125	10.5891	0.653628	0	0	0	0	0	0	1	0	0	0
CDCA2	NM_152562	NM_001110162,NM_175384	62.5194	49.7796	36.9414	68.7631	41.7643	34.5029	0	0	0	2.4418	1.95488	-0.320861	-0.893386	NA	2.67773	2.39141	-0.163154	0	0	0	0	0	0	0	0	0	0
CDCA3	NM_031299	NM_013538	50.9772	54.432	45.9893	60.1562	55.1425	44.2553	0	0	0	4.0375	3.88437	-0.0557798	-0.736755	4.7849	5.09687	3.38437	-0.590724	0	0	0	0	0	0	0	0	0	0
CDCA4	NM_017955,NM_145701	NM_028023	70.5667	54.6218	44.9827	77.0833	61.2948	45.8614	0	0	0	1.96406	0.888831	-1.14386	2.26688	1.1399	1.19834	1.41655	0.241347	0	0	0	0	0	0	0	0	0	0
CDCA5	NM_080668	NM_026410	58.8889	52.7044	49.3804	65.4545	58.7615	52.6634	0	0	2	2.60606	2.86484	0.136589	2.47521	13.75	1.92246	1.64707	-0.223052	0	0	0	0	0	0	0	0	0	0
CDCA7	NM_031942,NM_145810	NM_025866	71.9697	52.1323	45.1444	77.8626	50.2688	33.4087	0	0	1	2.92852	2.97266	0.0215827	-0.839353	0.5	3.12969	3.80938	0.283535	0	0	0	0	0	0	0	0	0	0
CDCA7L	NM_001127370,NM_001127371,NM_018719	NM_146040	72.7924	50.6454	44.3898	74.1667	47.9853	42.0942	1	1	0	6.15625	4.41094	-0.480966	0.377238	NA	5.58906	5.48594	-0.0268681	0	1	0	1	0	0	0	0	0	0
CDCA8	NM_001256875,NM_018101	NM_026560	60.8511	51.7241	51.2476	63.1034	51.3642	49.0761	2	1	1	2.39453	2.89297	0.272808	2.1585	2.84324	3.23789	2.06719	-0.647385	0	0	0	0	0	0	0	0	0	0
CDH2	NM_001792	NM_007664	71.831	49.5774	34.4094	70.8061	46.4168	32.2662	0	0	1	24	24	0	0.401823	0.293506	NA	24	NA	0	0	0	0	0	0	0	0	0	0
CDH24	NM_022478,NM_144985	NM_199470	71.2644	61.4663	74.3802	74.2308	64.237	60.9844	0	0	0	24	10.9953	-1.12615	0.357877	NA	24	10.8375	-1.147	0	0	0	0	0	0	0	0	0	0
CDIP1	NM_001199054,NM_001199055,NM_001199056,NM_013399	NM_025670	58.6345	57.7352	47.4813	66.055	58.9744	55.5907	4	1	0	5.45234	5.25938	-0.0519852	2.85033	9.17661	4.04766	3.13594	-0.36819	0	0	0	0	0	0	0	0	0	0
CDIPT	NM_006319	NM_026638	61.2048	55.1402	52.9915	71.75	57.4766	57.4519	3	2	0	7.2375	5.375	-0.429227	2.35555	6.296	4.90937	5.12812	0.0628921	0	0	0	0	0	0	1	0	0	0
CDK1	NM_001170406,NM_001170407,NM_001786,NM_033379	NM_007659	62.7907	48.3221	45.518	55.6338	38.8143	29.0764	0	0	1	4.82344	1.81953	-1.4065	-2.54585	0.114091	6.02969	11.2359	0.897966	0	0	0	0	0	0	0	0	0	0
CDK10	NM_001098533,NM_001160367,NM_052987,NM_052988,NR_027702,NR_027703	NM_194446,NM_194444	73.1707	55.771	56.6474	79.0698	59.8338	61.9048	2	0	0	5.65937	7.78125	0.459359	1.49847	108.219	2.14375	4.58281	1.0961	0	0	0	0	0	0	0	0	0	0
CDK11A	NM_024011,NM_033529	NA	NA	NA	NA	56.4815	56.6364	47.7273	0	0	0	5.91563	3.06758	-0.947431	-1.08853	5.1951	2.65	6.68281	1.33446	0	0	0	0	0	0	0	0	0	0
CDK11B	NM_033486,NM_033487,NM_033488,NM_033489,NM_033492,NM_033493	NA	NA	NA	NA	57.1429	56.7222	65.3846	0	0	0	5.13438	5.23281	0.027398	-1.11773	8.13996	5.56797	7.75312	0.477627	0	0	0	0	0	0	0	0	0	0
CDK12	NM_015083,NM_016507	NM_001109628	71.1974	49.8419	38.2979	64.5051	50.4049	36.2736	3	0	1	2.85742	1.74844	-0.708647	0.0404568	3.98101	3.87734	3.21641	-0.269619	0	0	0	0	0	0	0	0	0	0
CDK13	NM_003718,NM_031267	NM_027118,NM_001081058	78.6996	53.1746	35.0167	70.5674	52.8103	33.4262	0	0	0	1.92988	1.98613	0.0414488	-0.0508498	2.69287	2.89961	2.57344	-0.172161	0	0	0	0	0	0	0	0	0	0
CDK16	NM_001170460,NM_006201,NM_033018	NM_011049	76.2025	53.387	52.8363	76.3218	56.338	57.7832	3	2	0	24	22.0437	-0.122665	0.681096	3.53553	11.5031	11.2656	-0.0300985	0	0	0	0	0	0	0	0	0	0
CDK17	NM_001170464,NM_002595	NM_146239	75.1412	46.1832	36.7501	71.3608	40.9669	33.599	1	0	0	0.597852	0.595215	-0.00637702	0.142786	0.425628	3.17422	3.47031	0.128664	0	0	0	0	0	0	0	0	0	0
CDK2	NM_001798,NM_052827	NM_016756	68.3036	51.1706	44.1302	68.3544	51.1706	42.2778	1	0	0	5.54531	4.6375	-0.257922	0.659417	0.490264	5.92656	6.01094	0.0203945	0	0	0	0	0	0	0	0	0	0
CDK20	NM_001039803,NM_001170639,NM_001170640,NM_012119,NM_178432	NA	NA	NA	NA	64.9701	59.2896	50.2632	1	0	0	3.36133	4.43359	0.399445	2.27713	NA	2.08906	2.07481	-0.00988025	0	0	0	0	0	0	1	0	0	0
CDK2AP1	NM_001270433,NM_001270434,NM_004642,NR_073007,NR_073008	NM_013812	81	57.3913	45.8209	57.4713	58.7121	34.5953	0	0	0	24	15.1406	-0.664609	-1.91266	0.908787	24	24	0	0	0	0	0	0	0	0	0	0	0
CDK2AP2	NM_001271849,NM_005851,NR_073484	NM_026373	67.2131	61.7188	55.0885	68.8564	62.037	57.5824	0	0	0	4.95234	6.91094	0.48077	-0.124697	0.574463	8.34375	24	1.52427	0	0	0	0	0	0	0	0	0	0
CDK4	NM_000075	NM_009870	69.4215	54.2763	48.0534	69.863	54.057	46.2406	0	0	0	7.60781	4.68281	-0.700106	0.415538	2.8582	7.03437	6.02813	-0.222713	1	0	1	0	0	0	0	0	0	0
CDK5	NM_001164410,NM_004935	NM_007668	73.3333	52.901	53.286	76.0684	54.1524	61.4213	0	0	0	21.3438	7.74688	-1.46213	-0.58009	3.25006	24	16.0594	-0.579618	0	0	0	0	0	0	0	0	0	0
CDK5RAP1	NM_016082,NM_016408	NM_025876	60.3448	50.7074	37.2414	63.7097	51.3605	46.5686	1	0	0	7.15469	6.04063	-0.244191	-0.132404	2.20443	5.85313	5.875	0.00538176	0	0	0	0	0	0	0	0	0	0
CDK5RAP2	NM_001011649,NM_001272039,NM_018249,NR_073554,NR_073555,NR_073556,NR_073557,NR_073558	NM_145990	69.8864	49.6617	48.5327	67.1875	47.9761	46.594	0	0	0	6.04609	6.91406	0.19353	-0.256436	1.76691	4.86875	6.83437	0.489258	0	0	0	0	0	0	0	0	0	0
CDK5RAP3	NM_176096	NM_030248	61.6822	55.8201	54.1997	66.6667	55.8185	49.1039	0	0	0	13.3688	15.4125	0.205236	-0.443975	7.55755	6.25312	8.7625	0.486765	0	0	0	0	0	0	0	0	0	0
CDK6	NM_001145306,NM_001259	NM_009873	70.9091	53.6188	45.537	69.6602	51.9878	37.0878	4	0	0	6.94531	4.33437	-0.680216	-0.529145	NA	6.3375	7.23594	0.191266	0	0	0	0	0	0	0	0	0	0
CDK7	NM_001799	NM_009874	61.165	46.5898	43.0631	62.4309	41.4986	26.1017	0	0	1	5.46797	3.62344	-0.593646	-2.16861	0.441474	21.5063	24	0.158278	0	0	0	0	0	0	0	0	0	0
CDK8	NM_001260	NM_153599	80	46.1649	40.7502	65.2174	43.7276	45.2991	0	0	0	5.67734	4.2375	-0.422003	-0.473172	NA	3.93438	4.57031	0.216158	0	0	0	0	0	0	0	0	0	0
CDK9	NM_001261	NM_130860	82.8125	55.3172	49.5885	81.3008	57.3727	51.1382	2	1	0	2.43184	3.32422	0.450969	1.77547	5.48	1.72637	1.56777	-0.139023	0	0	0	0	0	0	0	0	0	0
CDKAL1	NM_017774	NM_144536	50	46.6321	40.3533	44.3114	43.6782	43.695	1	0	0	7.76719	5.65078	-0.458942	-0.184909	NA	8.02969	8.94063	0.155032	0	1	0	1	0	0	0	0	0	0
CDKL1	NM_004196	NM_183294	53.1429	49.5751	42.1978	28.5714	45.6825	29.1667	0	0	0	5.55156	3.47656	-0.675232	-0.0607502	NA	3.76953	5.88516	0.642696	0	0	0	0	0	0	0	0	0	0
CDKN1A	NM_000389,NM_001220777,NM_001220778,NM_078467	NM_007669,NM_001111099	57.0637	61.6667	51.1444	66.4	63.6364	54.5159	1	0	1	1.7085	1.25781	-0.441811	1.60516	0.506493	2.10781	3.60039	0.772407	0	0	0	0	0	0	1	0	0	0
CDKN1B	NM_004064	NM_009875	60.8863	58.4175	33.75	65.4661	58.459	33.4077	0	0	2	0.441406	0.933777	1.08097	0.541448	0.900001	0.752051	0.603125	-0.318373	0	0	0	0	0	0	0	0	0	0
CDKN1C	NM_000076,NM_001122630,NM_001122631	NM_009876	69.2308	68.9484	42.6883	70.4225	75.9259	44.3812	0	0	0	7.00469	4.07891	-0.780139	0.248094	NA	7.02344	5.64687	-0.314725	0	0	0	0	0	0	0	0	0	0
CDKN2A	NM_000077,NM_001195132,NM_058195,NM_058197	NA	NA	NA	NA	73.75	71.4286	47.8041	0	0	0	24	24	0	-0.519848	0.962229	24	24	0	0	1	0	0	0	1	0	0	0	0
CDKN2AIP	NM_017632	NM_172407	72.0497	50.6501	29.3723	69.7531	47.2748	31.1301	0	0	1	1.18189	2.63672	1.15765	-0.181047	4.08535	2.17051	2.36836	0.125855	0	0	0	0	0	0	0	0	0	0
CDKN2AIPNL	NM_080656	NM_029976	75.8621	57.5499	46.662	77.3585	57.5499	42.1176	1	0	0	13.7281	8.1125	-0.758917	0.471205	0.198714	24	24	0	1	1	1	1	0	0	0	0	0	0
CDKN2B	NM_004936,NM_078487	NM_007670	69.3617	67.6845	45.4902	66.6667	70.9832	38.0999	2	0	0	1.7249	1.91172	0.148356	0.516052	NA	1.90391	2.9418	0.627735	0	1	0	0	0	1	0	0	0	0
CDKN2C	NM_001262,NM_078626	NM_007671	49.5575	51.6765	32.4397	63.1579	52.071	34.8901	0	0	0	2.45234	2.24414	-0.127998	0.162419	2.31722	3.27813	2.35703	-0.4759	0	0	0	0	0	0	0	0	0	0
CDKN2D	NM_001800,NM_079421	NM_009878	66.5385	59.6806	46.4706	75	64.8703	47.3154	0	0	0	2.675	4.87031	0.864476	1.52703	NA	2.37695	6.4375	1.43739	0	0	0	0	0	0	0	0	0	0
CDKN3	NM_001130851,NM_005192	NM_028222	72.7273	44.3396	44.7368	73.6842	40.8451	30.4348	0	0	0	24	12.1438	-0.98282	-3.03144	NA	24	24	0	0	0	0	0	0	0	0	0	0	0
CDPF1	NM_207327	NM_197998,NM_001164625,NM_001164626	62.993	57.5	56.6641	78.0488	54.5699	56.6265	1	0	0	2.97891	4.50781	0.597645	2.18777	2.25769	2.09473	NA	NA	0	0	0	0	0	0	1	0	0	0
CDR2	NM_001802	NM_007672	78.0769	52.0468	43.3668	78.2468	51.7949	39.3586	0	0	1	0.404394	2.51289	2.63551	0.410337	NA	1.4959	1.69981	0.184357	0	0	0	0	0	0	0	0	0	0
CDR2L	NM_014603	NM_001080929	78.1327	61.588	52.5066	79.8544	65.9514	57.9803	1	0	0	4.88359	6.69219	0.454535	2.5333	3.04224	3.74375	2.85195	-0.392534	0	0	0	0	0	0	0	0	0	0
CDRT4	NM_001204477	NM_025496	55.4455	50.3704	40.2439	45.9075	48.366	48.521	1	1	0	2.19375	4.06875	0.891187	1.52082	NA	0.741357	1.66807	1.16994	0	0	0	0	0	0	0	0	0	1
CDS2	NM_003818	NM_138651	77.027	49.8876	50.85	73.1928	48.8042	46.8836	3	1	2	7.01328	5.97813	-0.230396	0.26352	NA	6.70625	6.67656	-0.00640065	1	1	0	0	1	1	0	1	0	0
CDT1	NM_030928	NM_026014	58.5366	62.4253	45.9916	66.6667	68.2511	57.551	2	2	0	3.54062	10.4125	1.55624	2.11997	0.883332	2.95117	2.88359	-0.03342	1	0	1	0	0	0	0	0	1	0
CDV3	NM_001134422,NM_001134423,NM_017548	NM_175833	77.9661	56.5012	42.726	77.1429	53.9254	39.228	1	0	0	3.67695	3.63125	-0.0180445	-0.190745	2.97329	5.33594	6.01484	0.172785	0	0	0	0	0	0	0	0	0	0
CDYL	NM_001143970,NM_001143971,NM_004824,NR_026590	NM_001123386	77.8986	52.2324	38.4726	48.199	51.816	36.7608	0	0	0	2.15391	1.56465	-0.461117	0.468226	3.05785	2.69609	2.70703	0.00584061	0	0	0	0	0	0	0	0	0	0
CDYL2	NM_152342	NM_029441	71.7647	56.6799	44.6526	74.2857	55.4898	49.9179	0	0	0	3.36094	3.10977	-0.112058	0.618889	NA	2.54102	3.0043	0.241622	0	0	0	0	0	0	0	0	0	0
CEBPB	NM_005194	NM_001287738,NM_001287739,NM_009883	79.4393	73.2884	53.7549	76.9401	73.5067	50.0808	0	0	0	0.977957	0.537451	-0.863638	-0.131959	0.952941	1.4751	1.72617	0.226765	0	0	0	0	0	0	0	0	0	0
CEBPD	NM_005195	NA	NA	NA	NA	75	74.9383	46.5995	0	0	1	1.35801	7.84219	2.52976	0.200834	11.8	4.35625	4.74219	0.122466	0	0	0	0	0	0	0	0	0	0
CEBPG	NM_001252296,NM_001806	NM_009884	66.5179	50.5519	40.636	69.3498	49.2274	37.5752	1	0	0	0.45415	1.75566	1.95077	-0.521381	1.4692	2.48184	9.1375	1.88039	0	0	0	0	0	0	0	0	0	0
CEBPZ	NM_005760	NM_001024806	70	44.3178	38.8571	60	39.3997	26.5152	0	0	0	4.13164	2.74648	-0.589129	-2.55976	2.68418	4.97031	7.55469	0.604035	0	0	0	0	0	0	0	0	0	0
CECR5	NM_017829,NM_033070	NM_144815	81.4815	56.9841	52.2621	55.814	59.7293	51.497	0	0	0	11.0094	8.03906	-0.453634	1.35742	2.06656	8.11875	5.70703	-0.508517	0	0	0	0	0	0	0	0	0	0
CELF1	NM_001025596,NM_001172639,NM_001172640,NM_006560,NM_198700	NM_017368	68.4049	49.4812	43.6529	30	50.6859	46.253	5	2	0	6.45625	3.64727	-0.823881	0.127012	8.27804	5.29219	5.18125	-0.0305641	0	0	0	0	0	0	0	0	0	0
CELSR1	NM_014246	NM_009886	100	59.7584	53.8184	0	64.1128	51.1092	1	0	1	8.2125	9.67812	0.236906	1.4735	4.06858	6.20156	7.26562	0.228455	0	0	0	0	0	0	0	1	0	0
CELSR3	NM_001407	NM_080437	NA	58.7321	51.9196	80.427	62.3705	52.7555	3	2	0	2.77188	4.95937	0.839296	2.26154	6.98018	2.59063	2.77344	0.0983753	0	0	0	0	0	0	0	0	0	0
CEMP1	NM_001048212	NA	NA	NA	NA	59.7015	61.828	62.7119	1	1	0	2.13496	9.05312	2.08421	1.32407	2.71056	0.475244	0.857031	0.850679	0	0	0	0	0	0	0	0	0	0
CENPA	NM_001042426,NM_001809	NM_007681	66.4336	55.5556	39.8263	70.4918	60.2837	36.5735	1	0	0	3.12383	1.27773	-1.28973	0.570896	NA	4.93438	2.32461	-1.08588	0	0	0	0	0	0	0	0	0	0
CENPB	NM_001810	NM_007682	89.0052	61.5556	50.8463	91.7874	64.9444	62.545	1	1	0	4.18984	4.1	-0.0312726	1.4375	3.77776	2.65078	2.59844	-0.0287728	0	0	0	0	0	0	0	0	0	0
CENPBD1	NM_145039	NA	NA	NA	NA	67.4725	50.3546	48.1061	2	0	0	0.228027	0.574585	1.33331	2.06553	NA	1.3771	0.952698	-0.531543	1	0	1	0	0	0	0	0	0	0
CENPF	NM_016343	NA	NA	NA	NA	55.1724	41.0166	35.6499	1	0	3	5.68125	3.22617	-0.816385	-2.80778	6.19295	6.80781	11.8	0.793524	0	0	0	0	0	0	0	0	0	0
CENPH	NM_022909	NM_021886	53.6082	43.9394	41.5888	55.1724	41.6667	41.7563	0	0	0	24	6.80781	-1.81777	-1.90492	0.106667	18.9125	18.0938	-0.0638486	0	1	0	1	0	0	0	0	0	0
CENPI	NM_006733	NM_145924	54.7278	42.0348	39.4035	51.8519	39.9824	27.2727	0	0	0	4.83203	1.24853	-1.95239	-0.543266	5.74994	5.04844	3.59961	-0.487997	0	0	0	0	0	0	0	0	0	0
CENPL	NM_001127181,NM_001171182,NM_033319	NM_001159930	52.7825	41.6185	40.8602	56.5506	42.2847	38.8641	0	0	0	1.74443	2.66133	0.609387	0.962777	2.63866	2.2668	2.14883	-0.0771052	1	0	1	0	0	0	0	0	0	0
CENPM	NM_001002876,NM_001110215,NM_024053	NM_001080158,NM_025639	67.6471	58.3794	52.3729	66.1765	60.5893	56.7398	0	0	0	14.3688	24	0.7401	0.928757	4.0099	24	24	0	0	0	0	0	0	0	0	0	0	0
CENPN	NM_001100624,NM_001100625,NM_001270473,NM_001270474,NM_018455	NM_028131	57.7381	45.9566	48.8055	68.3544	42.2764	27.2727	0	0	0	5.80391	4.16875	-0.477409	0.539239	NA	7.05938	11.35	0.68508	0	0	0	0	0	0	0	0	0	0
CENPO	NM_001199803,NM_024322	NM_134046	56.25	50.6132	48.7089	54.3307	48.8372	54.709	2	0	0	3.17773	4.18281	0.396475	2.1922	5.69712	2.37422	2.16797	-0.131109	0	0	0	0	0	0	0	0	0	0
CENPT	NM_025082	NM_177150	60	55.2326	49.4845	54.827	59.9644	54.5455	1	1	0	5.42812	7.32188	0.431759	-1.02627	1.58889	5.25	4.97109	-0.078754	0	0	0	0	0	0	0	0	0	0
CENPV	NM_181716	NM_028448	76.7857	64.4269	47.9263	88.7097	62.6374	46.9965	0	0	0	24	5.7	-2.074	-0.298436	1.75	24	24	0	0	0	0	0	0	0	0	0	0	0
CENPW	NM_001012507	NM_001109747	71.6667	50.1916	30.4458	59.2814	46.8165	28.4483	0	0	0	11.0906	13.4437	0.277594	-4.36819	0.351486	24	24	0	0	0	0	0	0	0	0	0	0	0
CEP104	NM_014704	NM_177673	68.3973	53.7217	48.1059	74.3733	48.3801	46.1909	0	0	0	8.225	8.18125	-0.00769439	1.08541	3.21911	6.62656	6.78594	0.0342875	1	1	1	1	0	0	0	0	0	0
CEP120	NM_001166226,NM_153223	NM_178686	71.4286	49.7809	40.8217	68.1034	42.3843	29.743	0	0	0	3.11055	2.61367	-0.25109	-0.784408	1.54291	3.59219	7.01328	0.965227	0	0	0	0	0	0	0	0	0	0
CEP128	NM_152446	NM_181815	52.8908	49.4711	41.1251	47.9532	44.3531	32.967	0	0	0	4.39453	6.32188	0.524643	-1.25606	2.02857	4.05391	10.4578	1.3672	0	0	0	0	0	0	0	0	0	0
CEP152	NM_001194998,NM_014985	NM_001081091	68.9796	50.5853	36.5385	60.6218	40.5806	29.582	0	0	0	2.78047	4.31094	0.632674	-2.23974	2.27697	3.41562	6.31406	0.886419	0	0	0	0	0	0	0	0	0	0
CEP164	NM_001271933,NM_014956	NM_001081373	66.9604	56.7466	52.2104	54.4218	56.9929	55.0091	3	1	0	5.16563	6.45469	0.321404	2.39832	2.40534	4.1875	5.4375	0.376854	0	0	0	0	0	0	0	0	0	0
CEP170	NM_001042404,NM_001042405,NM_014812	NM_001099637	43.3735	45.894	33.9911	63.7255	43.1546	31.5685	0	0	1	3.31562	1.84844	-0.842974	-1.29895	3.63668	3.39531	5.08828	0.583634	0	0	0	0	0	0	0	0	0	0
CEP170B	NM_001112726,NM_015005	NM_001024602	82.6271	61.0159	56.5813	72.2222	67.3684	62.2517	2	0	0	6.58437	5.75391	-0.194505	1.6842	10.3619	4.39687	4.68516	0.0916186	0	0	0	0	0	0	0	0	0	0
CEP192	NM_032142	NM_027556	53.7255	44.8244	26.1168	66.25	42.7502	25.8865	0	0	1	8.09844	7.14375	-0.180962	0.512493	3.04229	5.67344	7.12344	0.32835	0	0	0	0	0	0	0	0	0	0
CEP250	NM_007186	NM_177217,NM_008383	63.9024	57.3223	54.371	58.5781	56.9928	53.4483	3	1	0	3.84453	6.68594	0.798322	0.238361	8.14044	3.14727	4.91172	0.642129	0	0	0	0	0	0	0	0	0	0
CEP350	NM_014810	NM_001039184	76.4286	46.8023	42.484	72.846	41.672	36.7303	2	0	3	4.25312	2.47891	-0.77882	-1.08035	2.71305	4.29922	4.51875	0.0718491	0	0	0	0	0	0	0	0	0	0
CEP41	NM_001257158,NM_001257159,NM_001257160,NM_018718,NR_046443	NM_031998	60	51.2478	43.9644	60.6557	49.0196	41.1719	4	0	2	4.64531	3.78281	-0.296316	0.416249	NA	4.84687	5.68828	0.230938	0	1	0	0	0	1	0	0	0	0
CEP44	NM_001040157,NM_001145314	NM_001009951	56.2327	45.7364	22.619	46.6184	37.4254	33.0733	0	0	1	3.87578	2.7	-0.521528	-1.12678	NA	3.95938	4.09297	0.047875	0	1	0	1	0	0	0	0	0	0
CEP55	NM_001127182,NM_018131	NM_001164362,NM_028293	59.0979	45.3564	35.1672	67.7632	40.6452	33.8658	0	0	0	5.82656	4.59219	-0.343463	-1.46504	NA	7.62344	10.2125	0.421822	0	0	0	0	0	0	0	0	0	0
CEP57	NM_001243776,NM_001243777,NM_014679	NM_026665	64.7343	43.4464	34.9323	62.1849	40.652	32.4287	0	0	0	4.76953	3.24609	-0.555143	-1.82472	0.203523	6.99531	10.6562	0.607239	0	0	0	0	0	0	0	0	0	0
CEP63	NM_001042383,NM_001042384,NM_001042400,NM_025180	NM_001081122	72.028	48.3531	43.4783	62.029	41.1765	27.0492	0	0	0	4.95	7.46719	0.593137	-1.97865	3.80207	NA	17.1125	NA	0	0	0	0	0	0	0	0	0	0
CEP68	NM_015147	NM_172260	70.5882	54.9046	40.3022	67.757	58.3553	38.5299	1	0	1	2.37109	2.04453	-0.213783	0.731017	NA	1.85312	1.69238	-0.130904	1	0	1	0	0	0	0	0	0	0
CEP72	NM_018140	NM_028959	60.8696	51.6744	40.2278	76.3889	58.4362	36.6834	1	0	0	4.175	5.49453	0.39622	1.12018	10.2683	1.43076	1.92441	0.427635	0	0	0	0	0	0	0	0	0	0
CEP76	NM_001271989,NM_024899,NR_073537	NM_001081073	78.3951	46.7677	36.5814	71.6157	42.4242	27.7778	1	0	1	4.14062	1.35195	-1.6148	-0.902706	NA	4.02109	4.75156	0.240814	0	0	0	0	0	0	0	0	0	0
CEP78	NM_001098802,NM_032171	NM_198019	79.8165	49.8525	21.2121	74.6377	44.8594	29.5082	0	0	0	6.71875	6.03594	-0.154615	-0.590211	NA	7.95781	12.7844	0.683938	0	0	0	0	0	0	0	0	0	0
CEP85	NM_022778	NM_144527	68.2796	51.9685	49.3315	59.542	51.9004	50.231	1	0	0	2.26406	2.11367	-0.0991626	1.01324	22.4833	2.08457	2.11426	0.0204016	0	0	0	0	0	0	0	0	0	0
CEP89	NM_032816	NM_028120	69.9115	52.904	55.3719	64.0449	48.0442	56.7073	0	0	0	6.00312	7.86875	0.390421	-0.666385	NA	8.4875	4.77422	-0.830075	0	0	0	0	0	0	0	0	0	0
CEP95	NM_138363	NM_177088	69.0476	46.3366	28.9062	72.4138	42.2952	33.9394	0	0	0	5.33437	6.80781	0.351872	-1.16856	8.65454	5.55312	7.84219	0.497956	0	0	0	0	0	0	0	0	0	0
CEPT1	NM_001007794,NM_006090	NM_001293694,NM_133869	49.4949	41.4069	36.337	48.5577	41.0072	32.0707	0	0	0	8.69688	4.25039	-1.0329	-1.32442	NA	11.4469	8.18594	-0.483735	0	0	0	0	0	0	0	0	0	0
CERCAM	NM_016174	NM_207298	72.7273	57.9539	51.7937	76.8844	63.3669	58.4493	0	0	0	23.2937	19.8375	-0.231713	0.514237	3.14213	24	24	0	0	0	0	0	0	0	0	0	0	0
CERK	NM_022766	NM_145475	70.9939	56.6416	51.5438	86.9159	57.1252	48.7885	0	0	1	6.8625	8.43281	0.29728	1.37194	1.6375	5.0875	5.51094	0.115341	1	0	1	0	0	0	0	0	0	0
CERS2	NM_022075,NM_181746	NM_029789	75.6654	50.1312	45.1852	79.7927	51.9685	45.4359	0	0	0	13.475	9.85938	-0.450717	1.31038	1.35883	10.6562	11.7812	0.144793	0	0	0	0	0	0	0	0	0	0
CERS5	NM_147190	NM_028015	74.7748	50.6024	44.1971	64.7059	49.5335	47.6573	0	0	0	7.55938	6.32969	-0.256133	1.12327	2.24373	4.825	4.83437	0.00280044	0	0	0	0	0	0	0	0	0	0
CERS6	NM_001256126,NM_203463	NM_172856	70.2564	47.7056	43.2489	78.5	47.013	37.1345	3	0	2	15.9563	8.5	-0.908587	-0.0156967	0.400043	19.8813	16.4125	-0.276613	0	0	0	0	0	0	0	0	0	0
CES2	NM_003869,NM_198061,NR_036684	NA	NA	NA	NA	62.3	58.2799	48.5929	2	0	0	5.19922	5.61953	0.112155	1.72183	5.76068	4.59766	3.31094	-0.473659	1	0	1	0	0	0	0	0	0	0
CES3	NM_001185176,NM_001185177,NM_024922	NA	NA	NA	NA	49.3671	57.8089	60.4286	2	1	1	2.78516	7.35938	1.40183	0.000972931	4.42285	3.17188	2.31504	-0.454299	0	0	0	0	0	0	1	0	1	0
CETN2	NM_004344	NM_019405	67.3684	41.8112	37.9464	57.4468	42.7746	39.6887	0	0	0	24	9.88594	-1.27958	-1.78007	NA	24	24	0	0	0	0	0	0	0	0	0	0	0
CETN3	NM_004365	NM_007684	55.102	40.4762	26.009	55.2	35.5159	25.8523	0	0	0	4.54453	4.47187	-0.0232516	-3.20769	NA	24	24	0	0	0	0	0	0	0	0	0	0	0
CFD	NM_001928	NM_001291915,NM_013459	58.9041	58.8462	52.8571	64	72.0472	53.7634	0	0	0	24	14.85	-0.692571	-1.24931	NA	24	24	0	1	0	1	0	0	0	0	0	0	0
CFDP1	NM_006324	NM_011801	59.2233	47.6351	38.3929	67.1533	46.3333	32.2314	0	0	0	12.9688	7.00781	-0.888003	-3.39324	2.21207	24	24	0	0	0	0	0	0	0	0	0	0	0
CFH	NM_000186,NM_001014975	NA	NA	NA	NA	39.5833	39.8268	27.7487	1	0	0	24	24	0	-2.44434	NA	21.775	24	0.140362	0	0	0	0	0	0	0	0	0	0
CFL1	NM_005507	NM_007687	61.7391	55.848	46.4183	70.0855	55.0898	55.7471	0	0	0	24	24	0	-0.567388	0.716665	24	24	0	0	0	0	0	0	0	0	0	0	0
CFL2	NM_001243645,NM_021914,NM_138638,NR_028130,NR_028131	NM_007688	74.8092	39.9202	34.1421	57.3964	37.5556	32.5413	0	0	0	14.2094	7.54219	-0.913789	-0.305007	NA	24	24	0	0	0	0	0	0	0	0	0	0	0
CFLAR	NM_001127183,NM_001127184,NM_001202515,NM_001202516,NM_001202517,NM_001202518,NM_001202519,NM_003879	NM_207653	55.9072	47.9253	47.3049	57.6344	44.1441	28.7425	0	0	0	3.98281	2.89492	-0.460263	-1.27179	NA	3.58672	4.51406	0.331762	0	0	0	0	0	0	0	1	0	0
CGA	NM_000735,NM_001252383	NM_009889	49.4845	46.0055	48.8987	47.8873	47.2934	36.4341	0	0	0	24	24	0	-4.39634	NA	24	24	0	0	0	0	0	0	0	0	0	0	0
CGGBP1	NM_001008390,NM_001195308,NM_003663	NM_178647	59.3878	49.6032	35.5581	55.8537	47.0238	32.5007	0	0	1	3.53555	2.22656	-0.667115	-0.821245	0.220467	6.7375	9.40156	0.480687	0	0	0	0	0	0	0	0	0	0
CGREF1	NM_001166239,NM_001166240,NM_001166241,NM_006569	NM_026770,NM_001160149	60	56.953	52.4638	78.8732	59.1432	52.3529	0	0	0	12.8625	10.2984	-0.320745	0.214647	NA	24	24	0	0	1	0	0	0	1	0	0	0	0
CGRRF1	NM_006568	NM_026832	70.4225	48.5485	43.1034	74.7253	40.6406	29.1845	0	0	0	4.78437	0.785254	-2.6071	-0.527182	NA	5.12031	7.29141	0.509965	0	0	0	0	0	0	0	0	0	0
CHAC2	NM_001008708	NM_026527	63.4615	44.1341	28.4866	71.5789	43.7838	26.08	0	0	0	3.82969	3.66641	-0.0628603	-1.69991	NA	8.51094	24	1.49564	0	0	0	0	0	0	0	0	0	0
CHAF1A	NM_005483	NM_013733	83.3333	55.8114	51.8908	82	57.7847	49.4624	0	0	0	4.0875	4.525	0.146699	-0.149034	16.0466	2.39492	3.30625	0.465217	0	0	0	0	0	0	0	0	0	0
CHAF1B	NM_005441	NM_028083	72.381	52.7051	50	60.8696	50.7738	42.2993	1	0	0	4.42266	7.55625	0.772757	0.342148	2.05806	5.67812	8.15938	0.523044	0	0	0	0	0	0	0	0	0	0
CHCHD1	NM_203298	NM_025366	68.0851	52.1008	35.5191	65.3846	54.902	39.6963	1	0	1	8.05469	4.94375	-0.704223	-2.29698	NA	24	24	0	0	0	0	0	0	0	0	0	0	0
CHCHD10	NM_213720	NM_175329	59.8465	67.1463	51.145	72.5	72.4942	52.0231	0	0	0	24	24	0	-3.05091	0.212499	24	24	0	0	0	0	0	0	0	0	0	0	0
CHCHD2	NM_016139	NM_024166	51.5695	62.987	37.8261	60.4938	61.8421	36.6906	0	0	0	24	24	0	-0.727441	0.242857	24	24	0	0	0	0	0	0	0	0	0	0	0
CHCHD3	NM_017812	NM_025336	63.8889	52.4854	39.3586	67.9389	50.731	39.4839	0	0	0	8.2375	6.2875	-0.38972	0.00287722	4.04444	22.1125	24	0.118172	0	0	0	0	0	0	0	0	0	0
CHCHD4	NM_001098502,NM_144636	NM_133928	68.6047	54.0476	45.0609	74.359	49.4172	41.2346	0	0	0	3.175	4.19062	0.400409	0.544758	NA	6.86406	24	1.8059	0	0	0	0	0	0	0	0	0	0
CHCHD5	NM_032309	NM_025395	59.6154	58.5586	50.8373	61.2565	62.5378	56.2914	0	0	0	24	19.5656	-0.294713	-0.0311009	NA	24	24	0	0	0	0	0	0	0	0	0	0	0
CHCHD6	NM_032343	NM_025351	70.0935	57.5426	51.269	73.1183	59.7458	53.8813	1	1	0	7.99844	0.654394	-3.61149	-1.11854	NA	24	24	0	0	0	0	0	0	0	0	0	0	0
CHCHD7	NM_001011667,NM_001011668,NM_001011669,NM_001011670,NM_001011671,NM_024300	NM_181391,NM_001285804,NM_001190322,NM_001190324,NM_001190323	59.0201	44.9612	22.0591	58.1633	44.186	39.4247	0	0	0	8.21562	7.35	-0.160626	-1.10962	2.27523	24	24	0	0	0	0	0	0	0	0	0	0	0
CHD1	NM_001270	NM_007690	65.5172	44.7625	34.8491	27.7027	38.9636	31.2925	0	0	2	0.583252	1.96133	1.74964	-1.05331	2.34616	2.98281	4.77656	0.679299	0	0	0	0	0	0	0	0	0	0
CHD1L	NM_001256336,NM_001256337,NM_001256338,NM_004284,NM_024568,NR_046070	NM_026539	84.375	52.4972	40.293	77.7778	47.9347	40.0778	0	0	0	12.8812	24	0.897762	-0.80071	3.19041	7.40625	18.15	1.29315	0	0	0	0	0	0	0	0	0	0
CHD2	NM_001042572,NM_001271	NM_001081345	43.8811	47.9212	49.2272	43.6522	45.945	48.6675	0	0	1	2.54394	2.50547	-0.0219868	-0.185917	7.84808	2.66797	1.73555	-0.620351	0	0	0	0	0	0	0	0	0	0
CHD4	NM_001273	NM_145979	69.3593	52.1747	50.5085	73.1707	50.9671	48.6532	2	1	0	14.725	14.85	0.0121953	1.08693	14.572	15.6687	14.475	-0.114327	0	0	0	0	0	0	0	0	0	0
CHD6	NM_032221	NM_173368	36.8421	49.914	41.7743	48.8764	50.1227	37.1789	0	0	0	2.02266	4.13672	1.03224	-0.363913	22.0599	2.78984	3.25234	0.221295	0	0	0	0	0	0	0	0	0	0
CHD7	NM_017780	NA	NA	NA	NA	61.7886	48.9549	38.4432	0	0	0	1.61992	0.661816	-1.29142	0.456967	5.42175	2.17734	1.84023	-0.24268	0	0	0	0	0	0	0	0	0	0
CHD8	NM_001170629,NM_020920	NM_201637	NA	49.3612	46.9388	65.3061	48.4585	50.1193	0	0	0	3.76797	3.56641	-0.0793161	1.26422	9.39686	3.56836	3.31094	-0.108021	0	0	0	0	0	0	0	0	0	0
CHD9	NM_025134	NM_177224	52.8302	46.6667	35.7256	42.1053	40.9322	30.9935	0	0	1	1.48623	1.29619	-0.197379	-0.653904	7.9432	2.73086	3.61406	0.404267	0	0	0	0	0	0	0	0	0	0
CHDH	NM_018397	NM_175343,NM_001136240,NM_172264	61.8222	59.2965	49.6986	70.7483	63.4174	49.8649	2	0	0	4.40391	2.93125	-0.587268	2.38204	3.49698	3.45156	2.9625	-0.220435	1	0	1	0	0	0	0	0	0	0
CHEK1	NM_001114121,NM_001114122,NM_001244846,NM_001274,NR_045204,NR_045205	NM_007691	54.8673	43.0468	35.564	57.8595	41.789	50.4225	0	0	0	5.53125	2.77227	-0.99654	0.0586292	3.88045	6.82188	8.64687	0.342011	0	1	0	1	0	0	0	0	0	0
CHEK2	NM_001005735,NM_001257387,NM_007194,NM_145862	NM_016681	64.1026	47.8976	40.5644	68.0556	45.4044	33.1169	0	0	0	8.63438	4.64531	-0.894316	-0.816259	1.90006	9.94063	6.93125	-0.520221	0	0	0	0	0	0	0	0	0	0
CHERP	NM_006387	NM_138585	68.8742	59.7089	47.9419	75.6757	64.5947	52.126	1	0	0	5.54688	4.35547	-0.348847	2.09079	7.41988	3.70391	2.72461	-0.442998	0	0	0	0	0	0	0	0	0	0
CHFR	NM_001161344,NM_001161345,NM_001161346,NM_001161347,NM_018223	NM_001289580,NM_172717	66.0377	50.753	41.8539	71.4286	57.5294	48.6689	2	2	0	5.82891	24	2.04174	1.65078	NA	4.51641	5.17344	0.195948	0	0	0	0	0	0	0	0	0	0
CHIC2	NM_012110	NM_028850	79.6218	46.7871	38.843	70.1149	44.5783	29.9342	0	0	0	3.20742	1.47607	-1.11965	-1.60434	0.0596979	2.91602	3.75078	0.363192	0	0	0	0	0	0	0	0	0	0
CHID1	NM_001142674,NM_001142675,NM_001142676,NM_001142677,NM_023947	NM_001142681	61.6667	53.4005	51.5287	72.7273	59.2217	62.1311	2	1	0	11.425	24	1.07084	1.55516	10.9326	6.52813	24	1.87829	1	0	1	0	0	0	0	0	0	0
CHKA	NM_001277,NM_212469	NM_001271496	NA	50.7342	49.9478	80.3738	51.0917	51.2843	1	1	0	6.29063	4.0125	-0.648702	1.00592	NA	5.52109	4.4625	-0.307102	0	0	0	0	0	0	0	0	0	0
CHKB	NM_005198	NM_007692	62.8763	55.9494	53.8117	72.4771	57.2391	58.7444	0	0	0	0.643848	11.7125	4.18519	-0.187408	2.41062	1.54023	3.7125	1.26924	0	0	0	0	0	0	0	0	0	0
CHM	NM_000390,NM_001145414	NM_018818	46.4286	41.6792	33.7075	43.3333	40.9276	34.4638	0	0	3	5.41875	5.34609	-0.0194749	-0.629413	NA	4.44688	7.40937	0.73656	1	0	1	0	1	0	0	0	0	0
CHML	NM_001821	NM_021350	NA	44.3194	35.4034	37.1951	39.929	32.8737	2	0	0	4.89687	3.79531	-0.367642	-1.08718	NA	5.96719	24	2.00791	1	1	0	0	1	1	1	0	0	1
CHMP1A	NM_001083314,NM_002768,NR_046418	NA	NA	NA	NA	72.5888	60.2369	60.3058	1	0	1	5.68125	4.83594	-0.232413	2.91649	8.33384	3.70273	3.06328	-0.273513	0	0	0	0	0	0	0	0	0	0
CHMP1B	NM_020412	NA	NA	NA	NA	62.2951	54.1667	37.1685	0	0	0	2.68086	2.70508	0.0129749	0.094752	NA	2.8957	4.32266	0.578004	0	1	0	1	0	0	0	0	0	0
CHMP2A	NM_014453,NM_198426	NM_026885	61.9048	51.1211	43.4783	63.4615	54.858	48.1928	0	0	0	24	24	0	-3.62025	3.57065	24	24	0	0	0	0	0	0	0	0	0	0	0
CHMP2B	NM_001244644,NM_014043	NM_026879	74.6032	44.704	36.2463	66.5385	38.785	29.7219	0	0	1	9.00781	4.86172	-0.88971	-0.799654	0.499999	10.575	16.025	0.599667	0	0	0	0	0	0	0	0	0	0
CHMP3	NM_001005753,NM_001193517,NM_016079,NR_036454	NM_025783	65.625	49.037	44.5999	68.4564	49.7758	41.0278	1	1	0	24	24	0	0.615731	NA	22.075	24	0.120621	1	0	1	0	0	0	0	1	0	0
CHMP4A	NM_014169	NA	NA	NA	NA	51.145	53.1328	47.6351	0	0	0	8.2375	11.7438	0.511615	0.15086	2.5808	24	24	0	0	0	0	0	0	0	0	0	0	0
CHMP4B	NM_176812	NM_029362	82.3171	54.8148	49.5495	83.0303	53.4815	47.3358	1	0	0	9.25469	8.2625	-0.163606	-0.503753	5.76002	24	24	0	0	0	0	0	0	0	0	0	0	0
CHMP4C	NM_152284	NM_025519	60	54.9356	44.0157	67.8161	48.0057	38.8029	0	0	2	4.92031	3.29805	-0.577138	0.446811	NA	5.05938	6.04297	0.256298	1	0	1	0	0	0	0	0	0	0
CHMP5	NM_001195536,NM_016410	NM_029814	59.7015	48.9394	34.0426	57.5	45.9091	34.1322	0	0	0	11.5828	4.2625	-1.44221	-0.30182	0.789238	12.1656	21.8719	0.846266	1	0	0	0	1	0	0	0	0	0
CHMP6	NM_024591	NM_001085498	84.6154	57.7114	56.6929	79.4872	59.0759	66.1224	0	0	0	4.93438	4.94766	0.00387784	2.90897	4.43744	2.61055	1.93437	-0.432485	0	0	0	0	0	0	0	0	0	0
CHMP7	NM_152272	NM_134078	71.6049	56.8584	50.1182	56.1728	56.975	49.9286	2	0	1	3.58281	2.74375	-0.384944	1.74816	NA	2.58281	3.02813	0.229482	0	0	0	0	0	0	0	0	0	0
CHN1	NM_001025201,NM_001206602,NM_001822,NR_038133	NM_001113246	84.5902	47.5362	41.8182	73.0205	44.1304	35.5362	0	0	0	24	11.6344	-1.04464	-0.0151281	NA	NA	NA	NA	0	0	0	0	0	0	0	0	0	0
CHORDC1	NM_001144073,NM_012124	NM_025844	56.9231	41.6667	34.7544	59.7561	40.2402	30.0607	0	0	0	6.1125	4.83594	-0.337967	-1.36272	NA	8.59062	24	1.4822	0	0	0	0	0	0	0	0	0	0
CHP1	NM_007236	NM_019769	68.8312	49.8299	44.4028	68.75	49.1497	44.3109	0	0	0	24	24	0	-0.302941	0.757139	24	24	0	0	1	0	1	0	0	0	0	0	0
CHPF	NM_001195731,NM_024536	NM_001001566	79.5181	63.871	57.3566	65.5462	65.4723	63.9908	1	1	0	12.7156	7.86719	-0.692683	0.63995	0.819728	8.69688	7.87812	-0.142645	0	0	0	0	0	0	0	0	0	0
CHPF2	NM_019015	NM_133913	57.1318	60.7282	46.3415	61.5334	62.3113	45.6522	1	1	0	4.22891	3.19727	-0.403446	0.929157	2.89516	2.57266	3.01406	0.228451	0	0	0	0	0	0	0	0	0	0
CHPT1	NM_020244	NM_144807	82.3009	45.6976	30.8346	81.6143	45.9459	30.0813	0	0	0	24	12.0938	-0.988773	-1.90208	0.771427	24	24	0	0	0	0	0	0	0	0	0	0	0
CHRAC1	NM_017444,NR_023360,NR_040712	NM_053068	80	54.8718	50.2294	77.2277	47.7273	40.0315	0	0	2	9.32656	4.86172	-0.939879	-0.281933	2.59724	24	24	0	0	1	0	1	0	0	0	1	0	0
CHRNA5	NM_000745	NM_176844	44.7005	45.7099	39.6179	72	42.0753	38.8393	2	0	0	8.64219	5.90781	-0.548772	-0.381708	0.0813333	15.0062	24	0.677471	1	0	1	0	0	0	0	1	0	0
CHRNA9	NM_017581	NM_001081104	57.4074	51.5972	36.7089	52.518	49.375	32.7116	0	0	0	5.47969	3.29844	-0.732311	0.0776804	NA	5.41172	5.50469	0.0245739	0	0	0	0	0	0	0	0	0	0
CHST10	NM_004854	NM_145142	68.0365	49.0667	49.6628	71.8593	49.113	53.8628	3	1	0	1.67139	1.81855	0.121747	2.03381	2.3	1.74277	1.47881	-0.236949	0	0	0	0	0	0	0	0	0	0
CHST12	NM_001243794,NM_001243795,NM_018641	NM_021528	68.1416	58.5714	50.5325	79.7546	65.6225	51.363	1	0	0	2.76211	2.75391	-0.00429094	0.269403	NA	2.4457	2.18555	-0.162255	1	0	1	0	0	0	0	0	0	0
CHST14	NM_130468	NM_028117	73.0769	60.4775	47.198	81.4229	65.5172	50.86	0	0	0	6.06406	3.17969	-0.9314	0.943703	NA	2.98359	4.59141	0.621885	0	0	0	0	0	0	0	0	0	0
CHST2	NM_004267	NM_018763	75.3049	64.2812	41.4648	72.2045	66.5411	39.6262	1	1	0	2.93164	0.625293	-2.2291	1.43652	NA	2.22285	2.12773	-0.0630941	0	0	0	0	0	0	0	0	0	0
CHST3	NM_004273	NM_016803	66.8896	59.5685	49.865	74.7727	64.5139	53.5441	8	1	1	2.1584	4.47031	1.05041	2.75243	5.03872	1.72197	1.76094	0.0322816	1	0	1	0	0	0	0	0	0	0
CHST7	NM_019886	NM_021715	61.5385	66.0481	44.8739	69.7143	70.9103	44.1481	0	0	0	4.64453	2.91836	-0.670376	2.12743	NA	3.65078	3.45156	-0.0809553	0	0	0	0	0	0	0	0	0	0
CHSY1	NM_014918	NM_001081163	84.3434	55.3891	40.3509	83.6134	52.802	35.7357	0	0	1	2.27969	1.95332	-0.222908	0.132811	1.38572	2.18242	1.37075	-0.670963	0	1	0	1	0	0	0	0	0	0
CHTF18	NM_022092	NM_145409	70.7317	59.1065	53.1532	80.9524	67.1107	50.5051	0	0	0	10.025	9.36875	-0.0976738	0.701994	6.07714	6.07422	6.21563	0.0332005	0	0	0	0	0	0	0	0	0	0
CHTF8	NM_001039690,NM_001040146,NR_033227	NM_145412	67.4603	51.9126	54.4075	66.1972	53.0055	55.0497	5	1	0	3.41719	3.04531	-0.166219	1.90648	0.940118	2.72422	2.64141	-0.0445366	0	0	0	0	0	0	0	0	0	0
CHTOP	NM_001206612,NM_001244664,NM_015607	NM_023215	43.9487	56.7407	40.4863	62.0053	56.2667	41.3693	0	0	1	3.23359	2.30371	-0.489179	-0.167896	1.55778	3.48008	4.06953	0.225743	0	0	0	0	0	0	0	0	0	0
CHUK	NM_001278	NM_007700	77.2727	43.2976	34.8639	69.0909	42.1805	32.2502	0	0	0	8.89375	1.54365	-2.52644	0.411541	1.09091	5.93438	6.20469	0.0642626	0	0	0	0	0	0	0	0	0	0
CHURC1	NM_001204063,NM_001204064,NM_145165	NM_206534	61.2903	46.9027	42.1818	61.1111	44.5238	37.4681	3	0	2	6.18984	7.12656	0.203303	-1.35106	NA	8.50625	24	1.49644	1	1	1	0	1	1	1	0	0	0
CHURC1-FNTB	NM_001202558,NM_001202559	NM_145927	57.4468	55.5556	53.61	61.1111	52.3714	51.6754	0	0	0	9.67812	6.6125	-0.549532	0.333838	NA	3.71328	4.55781	0.295647	0	0	0	0	0	0	0	0	0	0
CIAO1	NM_004804	NM_025296	55.102	55.8824	37.8698	72.1951	57.9412	42.7606	2	0	0	5.41484	4.69609	-0.205458	0.699601	2.68462	4.825	5.52813	0.196261	1	0	1	0	0	0	0	0	1	0
CIAPIN1	NM_020313	NM_134141	64.7059	54.6237	50.3507	62.5731	50.9052	47.1357	0	0	0	6.7	5.2375	-0.355283	1.92508	NA	5.34297	5	-0.0957136	0	0	0	0	0	0	0	0	0	0
CIB1	NM_006384	NM_001291275,NM_011870	77.8656	54.3403	55.0239	73.4568	56.0764	58.5774	0	0	0	24	24	0	0.935915	0.334759	24	24	0	0	0	0	0	0	0	0	0	0	0
CIC	NM_015125	NM_027882	79.5827	61.1838	53.4426	82.5	66.1487	56.9307	1	0	2	3.32227	4.10938	0.306751	1.8784	9.11821	2.34668	2.82227	0.266233	0	0	0	0	0	0	0	0	0	0
CIDEB	NM_014430	NM_009894	52.4096	56.2121	47.5703	65.581	55.6061	48.2063	0	0	0	6.12031	5.27109	-0.215503	2.53027	NA	5.73594	3.95938	-0.534757	0	0	0	0	0	0	0	0	0	0
CINP	NM_001177611,NM_001177612,NM_032630	NM_026048,NM_027223	58.9041	50.8607	46.6211	60	48.5133	61.0909	2	0	0	12.0031	11.15	-0.106367	-0.212242	3.64753	24	24	0	0	0	0	0	0	0	0	0	0	0
CIRBP	NM_001280,NR_023312,NR_023313	NM_007705	66.8966	57.9961	47.3364	70.4698	57.0328	46.3649	1	0	0	6.78281	7.5375	0.152202	0.880959	4.85138	6.29375	8.58125	0.447268	0	0	0	0	0	0	0	0	0	0
CIRH1A	NM_032830	NM_011574	73.3333	48.2775	33.0357	76.0417	46.919	39.1753	0	0	0	9.375	6.83125	-0.456669	-0.839356	1.04286	9.07031	10.4797	0.208372	0	0	0	0	0	0	0	0	0	0
CISD1	NM_018464	NM_134007	73.5	52.5994	44.5242	66.8605	41.896	30.7023	1	0	1	10.6859	5.42266	-0.978642	-0.23494	0.383809	24	24	0	0	0	0	0	0	0	0	0	0	0
CISD2	NM_001008388	NM_025902	59.0426	52.2059	37.5471	79.4393	43.3824	35.9561	0	0	0	10.45	3.87656	-1.43065	-1.26061	NA	16.475	12.7781	-0.366602	1	1	1	1	0	1	0	0	0	0
CISD3	NM_001136498	NM_001085500	45.6376	54.5894	52.2989	87.2549	65.3646	55.1628	0	0	1	14.0906	8.60938	-0.710756	-0.531397	NA	24	24	0	0	0	0	0	0	0	0	0	0	0
CIT	NM_001206999,NM_007174	NM_007708	51.3067	55.869	51.0118	73.2143	52.351	48.8534	0	0	1	6.425	10.4156	0.696982	0.498621	11.2772	5.78437	8.99531	0.637012	0	0	0	0	0	0	0	0	0	0
CIZ1	NM_001131015,NM_001131016,NM_001131017,NM_001131018,NM_001257975,NM_001257976,NM_012127	NM_028412	64.1509	58.353	44.0945	79.7546	59.9184	46.2121	1	0	0	18.725	22.8562	0.287623	-0.515488	5.67146	24	24	0	0	0	0	0	0	0	0	0	0	0
CKAP2	NM_001098525,NM_018204	NM_001004140	74.0741	44.411	35.0604	65.4822	39.141	31.8763	0	0	0	3.27813	1.10847	-1.5643	-0.535637	0.458156	7.4875	15.3812	1.03862	0	0	0	0	0	0	0	0	0	0
CKAP2L	NM_152515	NM_181589	60.5634	46.6935	42.7536	60.7595	41.0188	37.1339	2	0	1	2.92188	3.27813	0.165976	-0.873548	4.44273	3.48516	8.27187	1.24699	0	1	0	0	0	1	0	0	0	0
CKAP4	NM_006825	NM_175451	95.4545	60.5324	44.3777	85.7143	62.2443	42.6072	1	1	0	8.61875	5.03516	-0.775442	1.59379	0.930921	8.49375	13.3594	0.65338	0	0	0	0	0	0	0	0	0	0
CKAP5	NM_001008938,NM_014756	NM_001165989	35.1351	43.8269	42.0091	52.381	44.4827	41.1043	0	0	1	11.3063	6.12109	-0.885259	-0.48875	2.70063	10.3781	11.6031	0.160968	0	0	0	0	0	0	0	0	0	0
CKB	NM_001823	NM_021273	70.1613	59.8604	53.8462	84.9057	64.2234	54.3689	0	0	0	24	24	0	-1.10929	5.77857	24	24	0	0	0	0	0	0	0	0	0	0	0
CKLF	NM_001040138,NM_016326,NM_016951,NM_181640,NM_181641	NM_029295	62.6087	43.7908	14.8936	64.7059	46.3333	48.913	0	0	0	16.7906	11.0656	-0.601571	-4.08039	NA	24	24	0	0	0	0	0	0	0	0	0	0	0
CKS1B	NM_001826,NR_024163	NM_016904	62.9412	49.1667	43.9636	64.4231	46.6667	41.7373	0	0	0	11.8187	7.07812	-0.739638	0.939149	NA	10.5625	12.7094	0.266942	0	0	0	0	0	0	0	0	0	0
CKS2	NM_001827	NM_025415	65.7459	44.5833	31.3653	62.1053	43.75	32.3741	0	0	1	9.1875	6.56328	-0.485255	-2.18763	0.311154	24	24	0	0	0	0	0	0	0	0	0	0	0
CLASP1	NM_001142273,NM_001142274,NM_001207051,NM_015282	NM_001081276	50	51.0085	48.3183	46.4103	48.3085	45.2836	1	0	0	5.37891	5.07969	-0.0825729	0.314792	NA	4.85781	4.50625	-0.10838	0	0	0	0	0	0	0	0	0	0
CLASP2	NM_001207044,NM_015097	NM_001114347,NM_001286601,NM_001081960,NM_001286602	39.4558	47.2308	38.2426	76.7773	44.3052	32.5084	0	0	2	10.8109	5.34297	-1.01678	-0.603543	1.23927	8.85	8.22031	-0.106484	0	0	0	0	0	0	0	0	0	0
CLASRP	NM_007056	NM_016680	72.973	61.6841	40.2778	73.4694	63.8025	48.6486	0	0	0	5.76797	9.29375	0.688197	0.0193478	3.85333	3.99453	4.40313	0.140502	0	0	0	0	0	0	0	0	0	0
CLCC1	NM_001048210,NM_015127	NM_001177770	61.1898	47.6453	38.0112	66.9231	44.7464	39.4209	1	0	0	9.8	8.33594	-0.233437	0.196856	NA	10.7312	24	1.16122	0	1	0	1	0	0	0	0	0	0
CLCN2	NM_001171087,NM_001171088,NM_001171089,NM_004366	NM_009900	72.1311	57.5358	42.6523	79.6512	59.8051	49.6437	2	1	1	3.18125	3.90547	0.295902	1.1481	NA	0.872412	2.60859	1.58019	0	0	0	0	0	0	0	0	0	0
CLCN3	NM_001243372,NM_001243374,NM_001829,NM_173872	NM_173874	67.0833	44.9058	42.4132	50.4472	43.5897	36.3636	0	0	0	8.175	3.96719	-1.0431	-0.634575	0.843053	6.04609	7.92188	0.389839	0	1	0	1	0	0	0	0	0	0
CLCN5	NM_000084,NM_001127898,NM_001127899,NM_001272102,NR_073607	NM_001243762	58.9443	49.3676	35.7692	62.3037	48.1844	40.5074	3	1	0	3.87656	4.55547	0.232821	0.0869979	NA	4.75156	4	-0.248402	1	1	0	1	1	0	0	0	0	0
CLCN6	NM_001256959,NM_001286,NR_046428	NM_011929	67.3913	54.3437	52.5502	65.2695	54.6743	51.1469	4	4	1	1.28413	6.11875	2.25244	0.542247	4.62367	1.65449	1.72285	0.0584105	0	0	0	0	0	0	0	0	0	0
CLCN7	NM_001114331,NM_001287	NM_011930	61.6279	54.602	53.7826	77.2727	61.7452	66.4311	5	1	0	10.15	14.4125	0.505841	3.19004	14.6177	5.30469	4.96719	-0.0948385	0	0	0	0	0	0	0	0	0	0
CLDN12	NM_001185072,NM_001185073,NM_012129	NM_022890,NM_001193659,NM_001193660,NM_001193661	57.664	53.0612	40.2201	55.1622	49.6599	32.9532	0	0	2	3.43281	2.88477	-0.250937	-0.519305	NA	3.98125	6.875	0.788138	0	0	0	0	0	0	0	0	0	0
CLDN15	NM_001185080,NM_014343	NM_021719	60.5042	57.3099	49.8922	58.4369	62.7365	61.0063	0	0	0	2.60742	6.59063	1.33779	0.928284	6.43241	1.42773	1.11592	-0.355496	0	0	0	0	0	0	0	0	0	0
CLDND1	NM_001040181,NM_001040182,NM_001040183,NM_001040199,NM_001040200,NM_019895	NM_001252450,NM_171826	63.3188	51.9685	36.2477	68.6441	44.6194	31.3659	0	0	1	4.75156	3.74297	-0.344219	-0.977694	0.297121	5.73359	NA	NA	0	0	0	0	0	0	0	0	0	0
CLEC16A	NM_001243403,NM_015226	NM_177562	69.6429	53.2948	52.2516	73.0435	54.6806	54.7299	3	0	1	7.0375	5.98906	-0.232733	1.46206	3.3114	5.86875	8.15781	0.475129	0	0	0	0	0	0	0	0	0	0
CLIC1	NM_001288	NM_033444	62.8631	53.4435	47.2868	66.2879	52.3416	49.4253	1	0	0	16.7219	8.64062	-0.952529	-2.14493	1.89999	24	16.55	-0.536203	0	0	0	0	0	0	0	0	0	0
CLIC4	NM_013943	NM_013885	73.3333	50.5249	46.1686	74.386	43.7008	33.54	0	0	2	17.3875	7.84687	-1.14786	0.500739	0.518521	24	24	0	0	0	0	0	0	0	0	0	0	0
CLINT1	NM_001195555,NM_001195556,NM_014666	NM_001045520	88.1188	51.4957	38.6398	73.6585	46.2194	31.1088	0	0	2	5.90156	4.04844	-0.543732	-1.23853	0.873709	6.54141	10.5	0.682717	0	0	0	0	0	0	0	0	0	0
CLIP1	NM_001247997,NM_002956,NM_198240	NM_019765	67.1579	50.2634	41.498	51.6129	46.6619	33.102	0	0	2	4.89453	3.53047	-0.471311	-1.6595	3.97013	4.6	7.73125	0.749068	0	0	0	0	0	0	0	0	0	0
CLIP2	NM_003388,NM_032421	NM_009990	68.2018	60.1463	57.9211	75.841	63.8669	60.5728	1	1	0	4.64375	5.59453	0.268727	2.39811	2.18037	4.3875	4.54688	0.0514762	0	0	0	0	0	0	0	0	0	0
CLK1	NM_001162407,NM_004071,NR_027855,NR_027856	NM_001042634	51.0204	42.0799	24.8731	58.5635	40	27.6094	0	0	0	0.9	2.09121	1.21634	-0.794152	1.79534	2.15137	24	3.47971	0	0	0	0	0	0	0	0	0	0
CLK2	NM_003993	NM_007712	78.2051	53.6667	45.614	76.5517	53.3066	46.2857	0	0	2	0.263916	24	6.50681	-0.567135	2.7793	1.32344	1.68652	0.349761	0	0	0	0	0	0	0	0	0	0
CLK3	NM_001130028,NM_003992	NM_007713	65.8892	58.3203	52.9915	58.1818	55.7366	53.1447	0	0	0	4.2625	3.40625	-0.323516	-0.44817	4.59277	3.2	3.06016	-0.0644667	0	0	0	0	0	0	0	0	0	0
CLMP	NM_024769	NM_133733	72.1362	54.2781	43.0048	69.3593	51.6043	39.7737	0	0	0	5.84844	4.90937	-0.252512	0.0596481	NA	5.67344	7.55938	0.414044	1	0	1	0	0	0	0	0	0	0
CLN3	NM_000086,NM_001042432	NM_009907,NM_001146311	54.868	56.4161	41.7532	62.8483	59.9089	57.8059	0	0	0	13.875	9.12656	-0.604344	0.518488	1.34619	9.81094	10.6891	0.123672	0	0	0	0	0	0	0	0	0	0
CLN5	NM_006493	NM_001033242	78.4615	47.271	43.5484	89.2857	47.4673	38.2429	1	0	0	11.6062	6.67656	-0.797724	0.0394531	0.107692	11.1344	18.0156	0.694228	0	1	0	0	0	1	0	0	0	0
CLN6	NM_017882	NM_001033175	80.2083	56.8501	52.9044	77.8481	58.8675	59.2334	2	2	0	18.5625	12.7188	-0.545434	1.71992	1.3	8.46562	11.3281	0.420221	0	0	0	0	0	0	0	0	0	0
CLNS1A	NM_001293	NM_023671	63.5417	50.6887	44.5748	66.3043	47.479	37.9189	0	0	0	12.1531	6.85938	-0.825179	-0.548735	3.55555	12.3	19.1938	0.641978	0	0	0	0	0	0	0	0	0	0
CLP1	NM_001142597,NM_006831	NM_133840	52.8571	50.3912	37.0283	55.3957	51.6432	38.2284	1	0	0	0.962079	2.07344	1.1078	-0.945727	NA	1.33945	1.50205	0.16529	0	0	0	0	0	0	0	0	0	0
CLPB	NM_001258392,NM_001258393,NM_001258394,NM_030813	NM_009191	57.8652	55.703	48.8613	58.7379	56.9813	54.5165	2	1	0	10.9437	7.77031	-0.494063	0.507745	15.9223	9.54375	7.2	-0.406559	0	0	0	0	0	0	0	0	0	0
CLPP	NM_006012	NM_017393	64.0625	58.7302	50	69.1057	64.1487	56.701	0	0	0	24	16.1812	-0.568711	-0.566258	NA	24	24	0	0	0	0	0	0	0	0	0	0	0
CLPTM1	NM_001294,NR_040006,NR_040007	NM_019649	80	55.0376	53.5545	83.3333	59.4527	64.1425	0	0	0	24	15.6687	-0.615144	0.747971	2.47919	24	21.6219	-0.150542	0	0	0	0	0	0	0	0	0	0
CLPTM1L	NM_030782	NM_146047	77.9661	49.0741	45.4023	93.4783	54.9165	49.7934	0	0	0	24	23.1187	-0.053971	0.21212	1.02222	24	24	0	0	0	0	0	0	0	0	0	0	0
CLPX	NM_006660	NM_011802	68.7225	46.0892	33.7317	73.6111	42.9548	28.382	0	0	2	5.33906	3.88203	-0.459775	-0.77337	1	6.7375	4.875	-0.466811	0	0	0	0	0	0	0	0	0	0
CLSPN	NM_001190481,NM_022111	NM_175554	62.0112	49.6201	44.1111	67.5	43.4577	44.0009	6	0	0	5.77266	4.77813	-0.272791	-0.73683	0.841577	5.35313	6.40859	0.259627	1	1	1	1	0	0	0	0	0	0
CLSTN1	NM_001009566,NM_014944	NM_023051	84.0909	57.0748	61.194	77.8656	56.31	55.2118	0	0	1	10.05	23.0437	1.19718	1.55221	4.09935	7.825	10.5375	0.42937	0	0	0	0	0	0	0	0	0	0
CLSTN3	NM_014718	NM_153508	59.3548	56.4263	55.8223	66.9065	58.4814	58.7339	1	1	1	6.39219	4.74844	-0.428857	1.25726	1.0125	3.51953	3.22891	-0.124338	0	0	0	0	0	0	0	0	0	0
CLTA	NM_001076677,NM_001184760,NM_001184761,NM_001184762,NM_001833,NM_007096	NM_001080385	67.5439	58.0991	40.8759	63.1841	57.6865	41.6667	0	0	0	24	5.47422	-2.13231	-0.829764	8.72999	24	24	0	0	0	0	0	0	0	0	0	0	0
CLTB	NM_001834,NM_007097,NR_045724	NM_028870	76.25	60.0629	47.483	81.5534	61.9497	56.7398	0	0	0	21.2	13.725	-0.627258	-0.701899	6.08044	24	24	0	0	0	0	0	0	0	0	0	0	0
CLTC	NM_004859	NM_001003908	69.5652	44.0135	35.8025	68.1716	42.2434	38.0477	0	0	0	24	10.9	-1.13871	0.589476	2.83673	24	24	0	1	0	1	0	0	0	0	0	0	0
CLTCL1	NM_001835,NM_007098	NA	NA	NA	NA	78.6667	51.3102	56.7829	1	1	0	6.15313	11.0312	0.842205	1.59465	NA	3.76562	4.75	0.335038	0	0	0	0	0	0	0	0	0	0
CLU	NM_001831,NR_038335,NR_045494	NM_013492	63.0901	54.4915	54.5455	65.0538	55.8519	42.8248	0	0	0	24	24	0	-2.2982	NA	24	24	0	0	0	0	0	0	0	0	0	0	0
CLUAP1	NM_015041,NM_024793	NM_029738	58.9577	47.0209	43.913	64.2276	45.2496	40.8633	0	0	0	2.4709	5.05	1.03125	-0.750213	3.27173	4.33594	5.39687	0.31578	1	0	1	0	0	0	0	0	0	0
CLUH	NM_015229	NM_001081158	78.75	56.4254	52.8698	82.5581	62.7735	64.4868	2	0	1	7.3	13.3844	0.874582	3.13338	23.8483	4.87188	4.57656	-0.0902126	0	0	0	0	0	0	0	0	0	0
CMAS	NM_018686	NM_009908	72.4138	52.04	42.246	75	45.5172	31.0249	0	0	0	7.38438	3.44023	-1.10197	-1.9749	0.229017	6.65	8.50625	0.355169	0	0	0	0	0	0	0	0	0	0
CMBL	NM_138809	NM_181588	55.5556	48.374	40.625	67.4058	44.5799	46.816	2	1	0	11.5078	6.7875	-0.761661	0.758813	1.15806	10.0672	12.4969	0.311907	1	0	1	0	1	0	0	0	1	1
CMC1	NM_182523	NM_026442	73.913	43.9252	39.1989	70.1863	38.9408	25.8741	0	0	0	3.51562	10	1.50815	-3.4764	0.8	24	24	0	0	0	0	0	0	0	0	0	0	0
CMC2	NM_020188	NM_026844	60.3053	51.6667	47.4265	67.3367	38.3333	38.8316	0	0	0	6.75	4.91563	-0.457513	-1.36769	NA	20.9812	24	0.193934	0	0	0	0	0	0	0	0	0	0
CMIP	NM_030629,NM_198390	NM_001163262	92.7711	57.9673	47.619	87.5	58.5271	49.3632	1	1	1	7.17344	6.27266	-0.193588	0.90181	NA	3.68203	3.78984	0.0416367	0	0	0	0	0	0	0	0	0	0
CMPK1	NM_001136140,NM_016308,NR_046394,NR_046395	NM_025647	85.1852	44.5906	35.8705	85.2349	45.9971	31.7574	0	0	0	11.2781	14.2656	0.339016	0.508628	NA	24	24	0	0	0	0	0	0	0	0	0	0	0
CMSS1	NM_001167924,NM_032359	NM_025599	64.6465	49.3381	NA	65.0685	45.2381	36.8852	0	0	0	15.7375	6.73438	-1.22459	-2.71923	3.2567	24	24	0	0	0	0	0	0	0	0	0	0	0
CMTM3	NM_144601,NM_181553,NR_037613,NR_037619	NM_024217	65.1613	55.1351	49.6689	79.5775	59.745	52.2709	0	0	0	6.19062	5.08203	-0.28468	1.98179	1.26319	2.81953	2.6207	-0.105501	0	0	0	0	0	0	0	0	0	0
CMTM4	NM_178818,NM_181521	NM_153582	83.0409	57.8947	47.4481	87.9121	58.5327	45.8402	5	2	0	5.95312	4.26016	-0.482741	1.35495	2.23481	3.78516	3.98047	0.0725857	0	0	0	0	0	0	0	0	0	0
CMTM6	NM_017801	NM_026036	60.6061	56.3406	48.2472	77.1084	46.1957	35.3852	0	0	0	14.7937	5.44062	-1.44314	0.388186	0.454967	13.1687	22.2875	0.759116	0	0	0	0	0	0	0	0	0	0
CMTM7	NM_138410,NM_181472	NM_133978	75.3927	58.3333	54.6485	77.5424	60.0379	52.9813	0	0	0	7.25156	5.7375	-0.33787	0.339078	NA	4.10625	NA	NA	0	0	0	0	0	0	0	0	0	0
CNBP	NM_001127192,NM_001127193,NM_001127194,NM_001127195,NM_001127196,NM_003418	NM_001109745,NM_013493	64.0553	52.8864	39.0449	69.4175	51.6854	41.6983	1	0	1	7.09219	5.60781	-0.338793	0.468577	0.828123	5.97031	6.78594	0.184742	0	1	0	1	0	1	0	0	0	0
CNDP2	NM_001168499,NM_018235	NM_023149	63.9344	54.7619	52.2282	67.9537	55.5322	50.4725	2	0	0	9.91875	8.5125	-0.220575	2.139	NA	7.85	7.7375	-0.0208251	1	0	1	0	0	0	1	0	1	0
CNIH	NM_005776	NM_009919	77.7027	50.3448	37.1277	71.8447	44.8276	31.7514	0	0	1	19.5562	8.20156	-1.25366	0.683424	0.244444	24	24	0	0	0	0	0	0	0	0	0	0	0
CNIH4	NM_014184	NM_030131	75.8065	44.2857	44.7236	75	40.4762	36.8421	0	0	0	22.8062	10.2094	-1.15953	-1.74625	0.1375	24	24	0	0	0	0	0	0	0	0	0	0	0
CNKSR3	NM_173515	NM_172546	69.6751	54.4964	43.0204	74.8515	51.4988	39.0521	0	0	0	1.38301	2.19687	0.667643	0.0320638	NA	1.55527	2.03164	0.385478	0	0	0	0	0	0	0	0	0	0
CNN2	NM_004368,NM_201277	NM_007725	82.9787	57.7342	49.0331	75.2066	60.9677	55.9657	1	0	0	10.8656	10.6281	-0.031884	2.37557	NA	9.24062	4.74375	-0.961962	0	1	0	1	0	0	0	0	0	0
CNN3	NM_001839	NM_028044	69.697	50.4532	40.6932	74.386	45.2525	31.732	0	0	0	9.77031	5.12969	-0.929534	-2.13838	1.425	24	24	0	0	0	0	0	0	0	0	0	0	0
CNNM2	NM_017649,NM_199076,NM_199077	NM_033569	67.7966	56.7732	48.0744	68.0982	57.377	51.5991	2	1	0	3.81484	2.62305	-0.54038	0.388642	NA	3.31797	3.38437	0.028589	1	0	1	0	0	0	0	0	0	0
CNNM3	NM_017623,NM_199078	NM_053186	72.7273	66.62	49.7173	79.1667	68.0791	48.6994	3	1	0	7.09375	6.36875	-0.155538	2.39262	3.58327	3.96406	4.13281	0.0601442	0	1	0	1	0	0	0	1	0	0
CNNM4	NM_020184	NM_033570	83.5616	56.8221	51.3902	81.6327	58.4622	51.5586	4	1	0	3.70312	3.45781	-0.0988834	1.94553	2.2474	2.5166	2.52734	0.00614497	0	0	0	0	0	0	0	0	0	0
CNOT1	NM_001265612,NM_016284,NM_206999,NR_049763	NM_001205226,NM_178078	54.1254	46.0384	41.7364	55.5556	45.169	42.0949	1	0	1	12.2812	8.05156	-0.609117	0.257672	0.991994	9.59219	8.85	-0.116182	0	0	0	0	0	0	0	0	0	0
CNOT10	NM_001256741,NM_001256742,NM_015442,NR_046352	NM_153585	67.3077	49.1723	50.8264	69.6203	42.4609	33.3333	1	0	0	5.6875	3.95938	-0.522522	-1.2167	0.899202	8.04688	7.56562	-0.0889694	0	0	0	0	0	0	0	0	0	0
CNOT11	NM_017546	NM_028043	75.6757	56.5876	43.6839	76.8293	54.1422	38.206	0	0	0	6.14375	4.69297	-0.388619	0.289794	NA	6.60469	5.33047	-0.309228	0	0	0	0	0	0	0	0	0	0
CNOT2	NM_001199302,NM_001199303,NM_014515,NR_037615	NM_001037846	53.1469	45.2865	40.1354	64.5233	43.931	36.6419	0	0	1	2.3582	4.0207	0.76976	-0.964852	0.914805	4.58984	6.575	0.518546	0	0	0	0	0	0	0	0	0	0
CNOT3	NM_014516	NM_146176	60.7774	56.6489	58.0292	70.679	60.2564	62.1262	2	1	0	4.13438	12.9281	1.64477	-0.718981	3.68283	4.08125	4.16563	0.0295219	0	0	0	0	0	0	0	0	0	0
CNOT4	NM_001008225,NM_001190847,NM_001190848,NM_001190849,NM_001190850,NM_013316	NM_001164413	51.5244	47.3511	38.6854	53.7764	47.6657	35.6881	0	0	0	0.251953	1.5874	2.65544	-1.68519	NA	2.69844	3.39375	0.330756	0	0	0	0	0	0	0	0	0	0
CNOT6	NM_015455	NM_212484	75.4875	42.1941	37.2917	75.9312	43.0705	35.059	1	0	0	6.14062	4.21953	-0.541303	-0.348394	8.18362	6.2125	8.1875	0.398249	0	0	0	0	0	0	0	0	0	0
CNOT7	NM_013354,NM_054026	NM_011135,NM_001271542	53.6753	41.8415	33.6791	57.8595	40.5594	33.5124	0	0	2	8.625	5.41484	-0.671605	-1.07204	NA	10	9.56563	-0.0640689	0	0	0	0	0	0	0	0	0	0
CNOT8	NM_004779	NM_026949	58	49.3743	46.1233	62.1514	43.9135	36.881	0	0	4	3.51523	1.9084	-0.881259	-0.0724153	NA	2.67031	3.81328	0.514024	0	0	0	0	0	0	0	0	0	0
CNP	NM_033133	NM_001146318,NM_009923	75.3086	56.8488	51.073	78.4722	59.3997	52.2036	3	1	0	5.54063	4.29531	-0.367285	2.18622	NA	4.34531	4.35469	0.00310926	0	1	0	1	0	0	0	0	0	0
CNPPD1	NM_015680	NM_026977	52	57.3529	47.0461	75	59.854	52.5399	1	0	0	5.75312	3.21719	-0.838546	2.15993	2.68812	3.51953	3.65078	0.0528219	0	0	0	0	0	0	0	0	0	0
CNPY2	NM_001190991,NM_014255	NM_019953	65.4971	52.2769	42.8571	64.8452	53.1876	39.8374	0	0	0	24	19.6469	-0.288734	0.737619	0.392	24	24	0	0	0	0	0	0	0	0	0	0	0
CNPY3	NM_006586	NM_028065	79.1209	57.5211	55.7809	65.2561	57.2282	59.7077	1	0	0	14.175	24	0.759686	0.765921	3.98151	24	24	0	0	0	0	0	0	0	0	0	0	0
CNPY4	NM_152755	NM_178612	43	52.8455	45.4277	53.3981	53.2798	49.1086	0	0	0	9.69063	6.70625	-0.531083	0.676233	0.4	6.72266	6.60625	-0.0251998	0	0	0	0	0	0	0	0	0	0
CNST	NM_001139459,NM_152609	NM_146105	66.8896	55.2903	44.7669	64.5503	46.0973	37.2058	1	1	0	3.07422	1.94492	-0.660508	-0.0528285	NA	3.51797	2.47109	-0.509593	0	0	0	0	0	0	0	0	0	0
CNTROB	NM_001037144,NM_053051	NM_172560	51.0455	59.3844	34.375	57.7406	59.4764	36.1858	0	0	0	6	4.85781	-0.304656	0.749803	20.1874	3.51367	3.77813	0.104691	0	0	0	0	0	0	1	0	0	0
COA1	NM_018224,NR_047701	NA	NA	NA	NA	53.6424	49.8866	39.7015	0	0	0	16.9594	7.50625	-1.17592	0.087434	0.416932	24	24	0	0	0	0	0	0	0	0	0	0	0
COA3	NM_001040431	NM_026618	56.1497	58.104	48.9247	77.2727	60.7477	47.4041	0	0	0	8.76562	7.66563	-0.193454	0.94955	0.20369	11.3187	24	1.08432	0	0	0	0	0	0	0	0	0	0
COA4	NM_016565	NM_183270	65.0485	58.7121	45.8984	63.8095	60.9848	40.7159	0	0	0	6.48438	5.79453	-0.162276	-0.792709	NA	24	24	0	0	0	0	0	0	0	0	0	0	0
COA6	NM_001012985,NM_001206641	NM_174987	66.129	53.75	32.7381	63.8767	40.4167	29.8701	0	0	0	4.84063	5.63594	0.219462	-2.56245	NA	24	24	0	0	0	0	0	0	0	0	0	0	0
COASY	NM_001042529,NM_001042532,NM_025233	NM_027896	62.0779	57.2695	48.8673	61.7486	58.5841	55.9105	0	0	0	10.0828	7.87188	-0.357119	1.39385	4.35958	6.43438	5.32891	-0.271961	0	0	0	0	0	0	0	0	0	0
COBL	NM_015198	NM_172496	75.7447	52.2172	42.8258	76.2162	55.7316	43.0919	0	0	0	5.65703	4.62812	-0.289617	1.30346	2.20463	5.20781	5.33437	0.0346416	0	0	0	0	0	0	0	0	0	0
COG1	NM_018714	NM_013581	58.4184	57.4924	44.5	69.4444	54.1964	34.5455	0	0	0	5.19062	4.47344	-0.214524	0.283243	NA	3.82617	4.42109	0.208502	0	0	0	0	0	0	0	0	0	0
COG2	NM_001145036,NM_007357	NM_029746	73.4513	52.7322	47.6744	72.1854	45.4668	42.9054	0	0	0	4.76641	3.43047	-0.474496	0.240133	1.28056	4.55938	4.74688	0.058142	0	0	0	0	0	0	0	0	0	0
COG3	NM_031431	NM_177381	78.1818	46.4013	47.1429	71.1268	43.265	38.3325	1	0	1	3.17031	2.59766	-0.287415	0.67296	NA	3.20742	4.3625	0.443741	0	0	0	0	0	0	0	0	0	0
COG4	NM_001195139,NM_015386	NM_133973	76.4706	51.3571	52.7624	63.6364	53.0802	57.3696	0	0	0	17.2937	13.9844	-0.306434	1.00481	2.14966	15.5625	11.1281	-0.483863	0	0	0	0	0	0	0	0	0	0
COG5	NM_001161520,NM_006348,NM_181733	NM_001163126	57.1429	46.0643	33.9506	60.381	43.6702	37.4153	0	0	0	12.1375	6.24844	-0.957904	-0.212945	NA	15.1125	20.25	0.42218	0	0	0	0	0	0	0	0	0	0
COG7	NM_153603	NM_001033318	72.2222	54.7773	43.6285	65.4822	53.5236	40.9836	0	0	0	5.625	4.21641	-0.415839	0.620901	NA	5.08828	6.14062	0.271207	1	0	1	0	0	0	0	0	0	0
COG8	NM_032382	NM_139229	52.9412	57.9303	52.4017	56.338	59.8695	49.9145	0	0	0	2.66016	2.67461	0.00781715	0.689695	1.89999	2.91875	3.07656	0.0759689	0	0	0	0	0	0	0	0	0	0
COIL	NM_004645	NM_016706	NA	53.8908	NA	54.8387	46.5049	34.3284	0	0	0	0.484326	7.40469	3.93439	-0.619603	NA	1.97773	1.82422	-0.116569	0	0	0	0	0	0	0	0	0	0
COL12A1	NM_004370,NM_080645	NA	NA	NA	NA	70.4819	48.7719	41.5128	1	0	1	12.7031	24	0.91785	0.111324	NA	7.44375	20.775	1.48075	0	0	0	0	0	0	0	0	0	0
COL16A1	NM_001856	NM_028266	65.1079	61.965	41.6216	69.589	63.7175	42.3267	0	0	0	5.54844	8.3875	0.596159	0.555874	NA	1.92422	4.575	1.2495	1	0	1	0	0	0	0	0	0	0
COL18A1	NM_030582,NM_130445	NM_001109991	72.4138	61.1475	45.5056	77.551	69.459	59.7579	3	2	0	8.49219	5.88516	-0.529056	1.82271	3.61471	4.35156	4.58281	0.0746997	0	0	0	0	0	0	0	0	0	0
COL1A1	NM_000088	NM_007742	62.069	62.9069	46.2403	62.6984	65.0284	50.3556	3	3	0	7.35	9.19375	0.322909	1.16198	NA	4.37188	6.05	0.468683	0	0	0	0	0	0	0	0	0	0
COL1A2	NM_000089	NM_007743	57.9251	59.5047	36.8899	60.0849	58.7905	32.1812	0	0	0	4.3125	3.96484	-0.12126	1.92159	NA	1.26929	1.90772	0.587827	0	0	0	0	0	0	0	0	0	0
COL25A1	NM_001256074,NM_032518,NM_198721,NR_045756	NM_029838,NM_001244952	60.0337	57.8711	43.3333	59.7701	57.1207	37.5	0	0	0	5.15234	5.525	0.100746	-0.362649	3.46585	4.24688	4.48125	0.0774996	0	0	0	0	0	0	0	0	0	0
COL27A1	NM_032888	NM_025685	72.89	62.4233	46.4646	0	64.6606	0	0	0	0	3.91406	3.56641	-0.134196	1.30501	6.46309	1.83945	2.68906	0.547827	0	0	0	0	0	0	0	0	0	0
COL3A1	NM_000090	NM_009930	50	56.8828	32.951	45.2991	56.8734	31.893	1	0	0	24	24	0	0.771447	0.46957	24	22.7875	-0.0747917	0	0	0	0	0	0	0	0	0	0
COL4A1	NM_001845	NM_009931	74.0088	60.3992	45.1379	78.6885	60.1198	35.3571	0	0	0	18.0594	9.32969	-0.952848	0.156471	NA	15.2531	9.26875	-0.718659	0	0	0	0	0	0	0	0	0	0
COL4A2	NM_001846	NM_009932	71.831	61.5144	51.3903	74.7405	63.164	52.3353	1	0	0	23.0437	13.2125	-0.802472	1.22427	3.3008	14.2781	24	0.749227	0	0	0	0	0	0	0	0	0	0
COL4A3BP	NM_001130105,NM_005713,NM_031361	NM_023420	70.6294	43.9467	37.0382	68.4834	42.3484	34.0865	1	0	2	2.7543	0.560937	-2.29577	0.252535	NA	2.98906	5.37734	0.8472	0	0	0	0	0	0	0	0	0	0
COL4A5	NM_000495,NM_033380	NM_007736,NM_001163155	51.1634	55.7132	31.952	48.9362	55.4765	31.0197	0	0	0	8.30625	6.225	-0.416123	0.0845326	NA	2.83906	5.65078	0.993035	0	0	0	0	0	0	0	0	0	0
COL4A6	NM_001847,NM_033641	NM_053185	54.8638	55.9102	44.5627	41.7476	57.171	44.8672	0	0	1	24	8.58594	-1.48299	0.645155	NA	13.6375	18.9812	0.476996	0	0	0	0	0	0	0	0	0	0
COL5A1	NM_000093	NM_015734	72.89	61.2833	48.4788	77.2251	64.3828	48.72	1	0	0	8.84062	7.17656	-0.300855	1.103	NA	6.85938	7.00312	0.0299217	0	0	0	0	0	0	0	0	0	0
COL5A2	NM_000393	NM_007737	49.7283	55.7855	33.9762	48.3636	55.9111	32.1578	1	0	1	18.5	14.6438	-0.33724	0.603883	NA	10.5	12.9234	0.299601	0	0	0	0	0	0	0	0	0	0
COL6A1	NM_001848	NM_009933	61.5686	57.8947	50.0652	73.5294	65.0146	58.1081	0	0	0	11.1937	5.93125	-0.916285	1.35819	4.41257	6.96406	8.19375	0.234595	0	0	0	0	0	0	0	0	0	0
COL7A1	NM_000094	NM_007738	NA	61.6865	57.5758	100	64.9915	59.4595	0	0	0	5.24531	5.06172	-0.0514014	1.16969	NA	2.21406	4.7375	1.09743	0	0	0	0	0	0	0	0	0	0
COL8A1	NM_001850,NM_020351	NM_007739	52.7273	58.2103	36.6001	52.7919	59.4631	34.3384	1	1	1	5.54063	6.70781	0.275794	-0.540479	NA	6.00469	10.0188	0.738541	0	0	0	0	0	0	0	0	0	0
COL9A3	NM_001853	NM_009936	78.9474	64.5619	41.0458	100	71.4842	48.0094	0	0	1	3.47695	2.37363	-0.550727	0.327829	NA	2.75703	1.86797	-0.561645	0	0	0	0	0	0	0	0	0	0
COMMD1	NM_152516	NM_144514	63.7795	52.0282	43.655	63.6364	51.6579	44.186	0	0	0	6.24297	14.8031	1.2456	-2.85835	0.24	15.3875	24	0.641276	0	0	0	0	0	0	0	0	0	0
COMMD10	NM_016144	NM_178377	73.0769	51.8883	41.5767	65.2174	43.3498	31.8182	0	0	0	24	5.51562	-2.12144	0.748693	NA	24	24	0	0	0	0	0	0	0	0	0	0	0
COMMD2	NM_016094	NM_175095	67.5	50.5	39.4437	65.4545	46.1667	35.431	3	0	2	6.75859	3.78437	-0.836668	0.671495	0.391873	5.80391	10.7406	0.887983	1	0	1	0	1	0	0	0	0	0
COMMD3	NM_012071	NM_147778	64.2857	47.449	46.2295	65.7143	46.0884	38.558	0	0	0	10.65	8.87187	-0.263542	-1.8405	0.178152	24	24	0	0	0	0	0	0	0	0	0	0	0
COMMD4	NM_017828	NM_025417	52	57	50.7538	63.1579	59.8333	55.597	0	0	0	24	18.8906	-0.345364	1.05564	NA	24	24	0	0	0	0	0	0	0	0	0	0	0
COMMD5	NM_001081003,NM_001081004,NM_014066	NA	NA	NA	NA	67.4825	62.2222	46.988	1	0	0	2.96719	6.14297	1.04984	1.26688	1.46149	2.26035	2.54336	0.170188	0	0	0	0	0	0	0	1	0	0
COMMD7	NM_001099339,NM_053041	NM_133850	71.1538	52.2388	47.0635	63.047	49.7512	49.4935	0	0	1	18.475	12.4203	-0.572873	0.931789	NA	24	24	0	0	0	0	0	0	0	0	0	0	0
COMMD8	NM_017845	NM_178599	56.4103	47.8261	41.1069	87.5	41.8478	28.3196	0	0	0	24	2.68711	-3.15891	-1.00676	NA	24	24	0	0	0	0	0	0	0	0	0	0	0
COMMD9	NM_001101653,NM_014186	NM_029635	50	54.2714	56.9204	62.1622	53.4338	46.2821	1	0	0	12.4734	11.125	-0.165054	0.918475	NA	13.4563	12.7188	-0.0813195	1	1	1	0	1	1	0	0	0	0
COMT	NM_000754,NM_001135161,NM_001135162,NM_007310	NM_007744,NM_001111062,NM_001111063	57.876	57.3935	48.4488	71.0843	61.7647	55.4479	2	0	0	24	13.1438	-0.868657	-0.306628	1.80001	24	24	0	0	0	0	0	0	0	0	0	0	0
COMTD1	NM_144589	NM_026965	67.619	63.8783	50.7072	75	70.0887	55.8824	1	0	0	12.9062	10.9656	-0.235081	-0.966784	3.76506	8.33125	4.46875	-0.898662	0	0	0	0	0	0	0	0	0	0
COPA	NM_001098398,NM_004371	NM_009938	64.8294	49.4694	42.7562	64.467	49.0884	40.1911	0	0	0	24	24	0	0.83208	4.75364	24	24	0	1	1	1	0	0	1	0	0	0	0
COPB1	NM_001144061,NM_001144062,NM_016451	NM_033370	59.7015	43.0119	30.094	57.8378	40.1118	28.3489	0	0	0	14.3469	7.23281	-0.988108	-0.888009	0.938982	15.0687	18.8656	0.324201	0	0	0	0	0	0	0	0	0	0
COPB2	NM_004766,NR_023350	NM_015827	68.8889	46.1001	35.9504	58.4615	43.7707	33.8235	0	0	0	18.4	8.52656	-1.10967	0.00176398	0.158766	19.525	15.0687	-0.373763	0	0	0	0	0	0	0	0	0	0
COPE	NM_007263,NM_199442,NM_199444	NM_021538	51.9031	58.1446	53.5714	52.381	63.2147	63.6364	0	0	0	24	24	0	-1.83444	2.53497	24	24	0	0	0	0	0	0	0	0	0	0	0
COPG1	NM_016128	NM_017477	61.7117	53.4095	47.6411	67	53.6381	40.6877	1	0	0	23.4812	14.4031	-0.705127	-0.00608686	1.62	24	14.9125	-0.686512	0	0	0	0	0	0	0	0	0	0
COPG2	NM_012133	NM_017478	71.4286	45.3746	41.1358	74.4444	43.8277	40.0458	0	0	0	24	21.6375	-0.149501	0.0544534	1.03334	24	24	0	0	0	0	0	0	0	0	0	0	0
COPRS	NM_018405	NA	NA	NA	NA	79.6296	57.1171	45.2555	0	0	1	14.0844	5.09141	-1.46796	-0.970456	0.370431	17.2906	24	0.473044	0	0	0	0	0	0	0	0	0	0
COPS2	NM_001143887,NM_004236	NM_009939,NM_001285512	60.6667	38.2883	40.9475	62.0253	36.2613	31.6517	1	1	0	5.36719	3.49766	-0.617778	-1.71023	1.55405	8.98438	6.89844	-0.381148	0	0	0	0	0	0	0	0	0	0
COPS3	NM_001199125,NM_003653	NM_011991	64.0351	44.1038	41.1538	73.5043	43.0031	33.9662	0	0	0	15.6937	8.47813	-0.888373	0.386897	0.343932	22.425	18.8156	-0.253176	0	0	0	0	0	0	0	0	0	0
COPS4	NM_001258006,NM_016129	NM_012001	64.881	46.9287	43.7158	60.4317	42.2604	33.5052	0	0	0	12.6125	5.59687	-1.17216	-0.868374	NA	24	14.1969	-0.75746	0	0	0	0	0	0	0	0	0	0
COPS5	NM_006837	NM_001277101,NM_013715	60	44.9751	37.3016	47.7341	44.2786	30.719	0	0	0	15.5406	10.2875	-0.595153	-2.31818	5.8	24	24	0	0	0	0	0	0	0	0	0	0	0
COPS6	NM_006833	NM_012002	73.8095	52.8205	44.2857	83.871	54.5732	50.2439	0	0	0	24	24	0	-2.11869	2.8	24	24	0	0	0	0	0	0	0	0	0	0	0
COPS7A	NM_001164093,NM_001164094,NM_001164095,NM_016319	NM_012003	72.9469	56.8841	48.3376	64.8352	56.5217	48.6842	4	1	0	11.9656	8.00156	-0.580543	1.00953	0.35475	10.3547	5.96484	-0.795728	0	0	0	0	0	0	0	0	0	0
COPS7B	NM_022730	NM_172974	61.8421	50.3145	52.4922	64.0777	51.4465	55.051	0	0	0	5.25625	4.69688	-0.162333	0.0745613	2.12618	4.4	5.70078	0.373656	0	0	0	0	0	0	0	0	0	0
COPS8	NM_006710,NM_198189	NM_133805	57.2935	51.9048	44.8529	60.3053	46.9841	34.3297	1	0	0	20.1156	9.16094	-1.13475	-0.823203	NA	24	24	0	0	0	0	0	0	0	0	1	0	0
COPZ1	NM_001271734,NM_001271735,NM_001271736,NM_016057,NR_073424	NM_019817	61.5385	50.3745	50.5348	62.1622	48.3146	46.9127	1	0	0	21.1062	13.4062	-0.654765	1.50732	1.33753	24	20.05	-0.259432	0	0	0	0	0	0	0	0	0	0
COQ10A	NM_001099337,NM_144576	NM_001081040	54.0586	57.6923	48.5769	65.4867	51.6975	43.7596	1	0	0	4.49688	3.43125	-0.390189	1.1139	NA	3.95625	8.59375	1.11915	0	0	0	0	0	0	0	0	0	0
COQ10B	NM_025147	NM_001039710	71.4286	46.6392	35.1502	68.5185	42.1199	37.5727	1	0	1	2.72812	2.43047	-0.166675	-1.44909	NA	3.62148	8.9875	1.31134	1	0	1	0	0	0	0	0	0	0
COQ2	NM_015697	NM_027978	76.7442	57.5111	46.4348	0	53.0016	31.7333	0	0	0	22.9062	9.6125	-1.25276	-1.58189	NA	18.8281	24	0.350145	0	0	0	0	0	0	0	0	0	0
COQ3	NM_017421	NM_172687	53.3333	49.7754	39.8555	55.5556	44.3243	30.4688	0	0	0	11.25	6.09844	-0.883413	-0.898308	NA	7.55469	7.28281	-0.0528764	0	0	0	0	0	0	0	0	0	0
COQ4	NM_016035	NM_178693	73.0769	60.2996	47.5086	59.0778	64.1604	56.9087	1	0	0	10.5156	22.3625	1.08855	0.801048	1.175	11.2281	24	1.09592	0	0	0	0	0	0	0	0	0	0
COQ5	NM_032314	NM_026504	76.5957	54.1667	48.3101	50	50	41.7822	1	0	0	7.10469	6.2875	-0.176285	0.517007	0.979998	6.76875	7.2	0.0891075	0	0	0	0	0	0	0	0	0	0
COQ6	NM_182476,NM_182480	NM_172582	62.6506	55.4158	45.4545	66.6667	53.5892	30.6306	0	0	0	24	24	0	-0.653271	NA	24	14.5062	-0.72636	0	0	0	0	0	0	0	0	0	0
COQ7	NM_001190983,NM_016138	NM_009940	62.8571	53.9755	41.2903	50	54.2813	40.1652	0	0	0	7.82969	4.12812	-0.923468	0.0392392	NA	7.03125	15.2156	1.1137	0	1	0	1	0	0	0	0	1	0
COQ9	NM_020312	NM_026452	71.2871	59.2357	48.7936	69.1358	57.9937	49.3088	4	0	0	8.5875	6.45	-0.412939	1.1837	1.11111	7.25312	8.16563	0.170961	0	0	0	0	0	0	0	0	0	0
CORO1B	NM_001018070,NM_020441	NM_011778	72.5	56.2199	53.9936	72.973	63.9456	63.8298	0	0	0	19.4625	10.6375	-0.871538	1.01069	6.70606	24	15.0156	-0.676569	0	0	0	0	0	0	0	0	0	0
CORO1C	NM_001105237,NM_001276471,NM_014325	NM_011779	79.7386	54.1754	52.1171	77.9528	48.5614	42.633	0	0	0	7.03437	5.44375	-0.369821	1.09704	1.29116	7.83906	7.97813	0.0253685	0	0	0	0	0	0	0	0	0	0
CORO2A	NM_003389,NM_052820	NM_001164804	76.4249	55.0476	48.8372	81.0345	56.8441	47.6441	3	0	0	5.2875	6.51719	0.301664	1.52533	NA	4.31797	3.9875	-0.114868	1	1	1	0	1	1	1	0	0	0
COTL1	NM_021149	NM_028071	68.7151	58.042	58.1373	83.2215	58.2751	52.927	0	0	0	24	24	0	1.64444	2.31999	24	24	0	0	0	0	0	0	0	0	0	0	0
COX10	NM_001303	NM_178379	68.1818	57.2072	51.9732	67.6471	53.979	47.6808	0	0	0	2.77031	3.50859	0.340844	0.553446	NA	4.25312	4.35547	0.0343048	0	0	0	0	0	0	0	0	0	0
COX11	NM_001162861,NM_001162862,NM_004375,NR_027941,NR_027942	NM_199008	52.9412	56.0386	35.8839	57.8947	53.3046	37.2881	0	0	0	13.175	7.97187	-0.724812	-1.21339	0.496759	24	24	0	0	0	0	0	0	0	0	0	0	0
COX14	NM_001257133,NM_001257134,NM_032901	NM_183256	65.272	57.4713	45.4839	61.7021	54.023	47.5	0	0	0	24	20.05	-0.259432	-0.77038	NA	24	24	0	0	0	0	0	0	0	0	0	0	0
COX15	NM_004376,NM_078470	NM_144874	67.4157	55.153	44.4765	65.4781	52.3925	38.7738	4	0	0	10.4469	11.7266	0.166708	1.54519	0.804707	9.46875	6.70625	-0.497668	1	1	0	1	1	0	1	0	1	0
COX16	NM_001204090,NM_016468	NM_025461	63.2258	42.3676	34.6179	51.3889	42.3676	37.8594	0	0	0	24	7.59063	-1.66074	-1.00276	NA	24	24	0	0	1	0	1	0	0	0	0	0	0
COX17	NM_005694	NM_001017429	57.2727	57.8125	28.8732	58.1395	54.1667	28.9655	0	0	0	13.9437	13.8625	-0.00843115	-4.63234	0.824999	24	24	0	0	0	0	0	0	0	0	0	0	0
COX18	NM_173827	NM_001033310	64.5161	58.1325	32.3636	65.0943	51.6966	39.4436	2	0	0	4.19219	10.3031	1.29731	0.608728	NA	NA	6.78047	NA	1	1	1	1	0	0	0	0	1	0
COX19	NM_001031617	NM_197980	67.5	48.0287	50.7136	76.6667	41.7582	52.8269	3	3	0	1.3207	4.27148	1.69343	0.954404	NA	2.02988	1.4499	-0.485441	1	0	1	0	0	0	1	0	0	0
COX4I1	NM_001861	NM_009941	71.8519	53.3333	60	71.123	53.3333	51.1811	0	0	0	24	24	0	-3.1935	1.1	24	24	0	0	0	0	0	0	0	0	0	0	0
COX5A	NM_004255	NM_007747	70.8333	51.9274	35.2941	75	52.7594	36.3636	1	0	0	24	24	0	-2.40311	0.0611109	24	24	0	0	0	0	0	0	0	0	0	0	0
COX5B	NM_001862	NM_009942	61.165	58.2051	36.0215	58.6207	60	40.6977	0	0	0	24	24	0	-4.26701	NA	24	24	0	0	0	0	0	0	0	0	0	0	0
COX6A1	NM_004373	NM_007748	64.5161	64.3068	48.7562	59.4595	58.4848	44.3902	0	0	0	24	24	0	-3.55667	0.145454	24	24	0	0	0	0	0	0	0	0	0	0	0
COX6B1	NM_001863	NM_025628	54.1284	53.2567	48.8889	58.8542	54.7893	50.365	0	0	0	24	24	0	-4.1737	6.15	24	24	0	0	0	0	0	0	0	0	0	0	0
COX6B2	NM_144613	NM_183406,NM_183405	57.1399	54.3071	54.6154	70.4918	60.6742	56.1418	0	0	1	4.83594	2.05684	-1.23337	-0.492625	NA	1.25371	3.83906	1.61455	0	1	0	1	0	0	0	0	0	0
COX6C	NM_004374	NM_053071	58.5185	50.2165	36.4964	47.1744	46.4912	32.1678	0	0	0	24	19.6187	-0.290801	-4.45975	0.271786	24	24	0	0	0	0	0	0	0	0	0	0	0
COX7A2	NM_001865,NR_029466	NM_009945	63.7755	50	37.2549	50	49.7126	36.8627	0	0	0	24	24	0	-4.06387	0.377569	24	24	0	0	0	0	0	0	0	0	0	0	0
COX7A2L	NM_004718	NM_009187	70.6897	50.5952	47.9532	70.9091	50.1449	37.535	0	0	0	11.4375	6.5	-0.81526	1.14027	NA	7.49219	11.8	0.655328	0	0	0	0	0	0	0	0	0	0
COX7B	NM_001866	NM_025379	51.9084	47.3251	37.799	47.7778	44.0329	31.7073	0	0	0	24	24	0	-5.3076	0.133333	24	24	0	0	0	0	0	0	0	0	0	0	0
COX7C	NM_001867	NM_007749	55.4585	49.4792	25.2101	52.809	46.3542	37.3016	0	0	0	24	24	0	-3.75289	0.1	24	24	0	0	0	0	0	0	0	0	0	0	0
COX8A	NM_004074	NM_007750	67.3077	64.7619	49.7835	58.1081	65.2381	52.4664	0	0	0	24	24	0	-2.62304	0.466667	24	24	0	0	0	0	0	0	0	0	0	0	0
CPA4	NM_001163446,NM_016352	NM_027926	56	51.1481	46.4507	51.0638	50.237	48.0053	1	0	0	6.09063	5.55312	-0.13329	-0.128058	NA	5.57031	9.3625	0.749135	0	1	0	1	0	0	0	0	0	0
CPE	NM_001873	NM_013494	71.4286	53.8784	36.9912	72.9242	51.8519	28.6111	0	0	1	24	24	0	-1.57368	0.470589	24	24	0	0	0	0	0	0	0	0	0	0	0
CPED1	NM_001105533,NM_024913	NM_001081351	47.8212	47.2574	37.748	46.7562	42.3888	30.971	0	0	1	1.06973	6.7	2.64692	-0.655302	NA	3.81797	NA	NA	0	0	0	0	0	0	0	0	0	0
CPM	NM_001005502,NM_001874,NM_198320	NM_027468	77.4194	50.3754	45.5115	75.4098	42.3423	41.6841	5	1	0	9.20625	8.38438	-0.13491	1.18141	NA	8.88281	13.5469	0.608872	1	1	1	1	1	0	1	0	0	0
CPNE2	NM_152727	NM_153507	77.686	54.5841	43.6807	83.3922	56.7092	47.4026	0	0	0	8.75625	7.65	-0.194853	0.170875	0.15102	9.3625	13.2906	0.505444	0	0	0	0	0	0	0	0	0	0
CPNE3	NM_003909	NM_027769	64.6552	43.5081	36.8957	53.7037	42.8748	34.7798	1	0	0	24	10.3438	-1.21428	0.655939	0.966671	24	24	0	0	0	0	0	0	0	0	0	0	0
CPNE7	NM_014427,NM_153636	NM_170684	76.4706	57.945	56.5289	82.3077	62.5522	64.64	3	2	0	5.35625	24	2.16374	0.494591	NA	3.95	7.28125	0.882333	0	0	0	0	0	0	0	0	0	0
CPNE8	NM_153634	NM_025815	75	45.3864	37.4335	67.8571	41.2979	30.6778	1	0	1	7.00625	2.33457	-1.58549	-0.057213	NA	5.83437	6.11719	0.0682905	0	0	0	0	0	0	0	0	0	0
CPOX	NM_000097	NM_007757	64.5455	58.8589	37.0257	66.3551	57.0696	33.3064	0	0	0	5.56406	3.05664	-0.864192	0.84985	NA	3.94687	4.39375	0.154742	0	0	0	0	0	0	0	0	0	0
CPPED1	NM_001099455,NM_018340	NM_146067	68.1818	56.23	44.0709	60.3604	57.8836	41.262	2	0	1	6.16094	4.63438	-0.410775	1.12775	NA	4.73594	6.0875	0.3622	1	1	1	1	0	0	1	0	1	0
CPS1	NM_001122633,NM_001122634,NM_001875	NM_001080809	38.1295	49.034	35.7065	32.5926	46.1914	35.6506	0	0	0	24	24	0	-0.134519	0.898425	24	24	0	0	1	0	1	0	0	0	0	0	0
CPSF1	NM_013291	NM_053193,NM_001164173	76.1062	56.2413	39.4737	72	62.4192	49.4253	0	0	0	10.6922	14.4344	0.432952	1.19378	8.51914	7.74531	9.95625	0.362279	0	0	0	0	0	0	0	0	0	0
CPSF2	NM_017437	NM_016856	67.5258	47.0413	40.0072	53.3582	40.7833	38.2892	0	0	0	9.19063	6.17812	-0.572994	-0.119163	2.13552	10.3781	8.98438	-0.208056	0	1	0	1	0	0	0	0	1	0
CPSF3	NM_016207	NM_018813	56.0606	48.3212	47.557	61.6034	41.9465	35.4839	0	0	0	10.1391	7.77344	-0.383299	-1.56614	0.911109	24	17.925	-0.421061	0	0	0	0	0	0	0	0	0	0
CPSF3L	NM_001256456,NM_001256460,NM_001256462,NM_001256463,NM_017871	NM_028020	76.1905	52.8564	49.2823	73.4177	60.3993	58.3942	1	1	0	7.45156	9.31094	0.321383	1.34717	12.8199	5.40625	5.54063	0.0354205	0	0	0	0	0	0	0	0	0	0
CPSF4	NM_001081559,NM_006693	NM_178576	77.4436	54.5597	53.8829	81.1189	57.8231	54.2955	1	0	0	3.1375	5.13281	0.710134	1.62935	3.70097	2.73906	2.34375	-0.224864	0	0	0	0	0	0	0	0	0	0
CPSF6	NM_007007	NM_001013391	79.1667	51.7512	33.3055	76.3636	50.0604	31.7938	0	0	2	8.83437	4.4	-1.00562	-1.48685	0.434286	8.6625	10.425	0.267192	0	0	0	0	0	0	0	0	0	0
CPSF7	NM_001136040,NM_001142565,NM_024811	NM_172302,NM_001164272	68.3453	53.4605	44.6071	68.6567	54.1397	47.3812	1	1	0	2.77109	3.43828	0.311232	1.44233	1.48214	2.98906	2.4457	-0.289444	0	0	0	0	0	0	0	0	0	0
CPT1A	NM_001031847,NM_001876	NM_013495	73.5632	54.0052	46.8006	76.4706	53.273	47.2293	0	0	1	14.3313	10.7406	-0.416086	1.9823	13.1541	9.20625	8.09375	-0.185805	1	1	1	1	0	0	0	0	0	0
CPT2	NM_000098	NM_009949	68.0556	52.4532	44.6215	57.8641	52.8073	44.3522	0	0	0	3.92109	2.91406	-0.428224	1.34635	NA	4.62969	5.32656	0.20229	1	0	1	0	0	0	0	0	0	0
CPVL	NM_019029,NM_031311	NM_001289713,NM_027749	49.6	48.0167	37.1429	68.0672	44.6541	26.9504	0	0	0	24	24	0	-1.70819	0.317519	24	24	0	0	0	0	0	0	0	0	0	0	0
CPZ	NM_001014447,NM_001014448,NM_003652	NM_153107	69.3252	58.4733	55.8333	73.5632	62.8892	56.9444	0	0	0	24	24	0	-0.0572444	NA	24	24	0	0	0	0	0	0	0	0	0	0	0
CRABP2	NM_001199723,NM_001878	NM_007759	51.4286	51.0791	49.5575	61.5385	53.2374	54.067	0	0	0	22.7937	24	0.0743961	-1.2495	NA	24	24	0	0	0	0	0	0	0	0	0	0	0
CRADD	NM_003805	NM_009950	38.6555	57.5	47.3684	51.9231	57.3333	35.5372	0	0	0	7.86094	5.125	-0.617149	-1.50334	NA	9.17188	NA	NA	0	0	0	0	0	0	0	0	0	0
CRAMP1L	NM_020825	NM_020608	51.4286	56.1431	45.4136	0	62.7034	51.0484	3	1	0	1.56914	2.53125	0.689875	1.57525	4.05239	1.50078	1.5001	-0.000656715	1	0	1	0	0	0	0	0	0	0
CRBN	NM_001173482,NM_016302	NM_175357	50	44.0957	34.9914	56.6667	42.0617	32.224	0	0	1	5.21875	5.30469	0.0235636	-1.33578	0.680301	8.775	13.0469	0.572234	0	0	0	0	0	0	0	0	0	0
CRCP	NM_001040647,NM_001040648,NM_001142414,NM_014478,NR_024548	NM_007761	67.2727	51.0067	48.6631	68.2759	47.2036	46.899	2	0	0	2.35898	4.56875	0.953634	1.46071	3.44672	1.28867	1.27241	-0.0183192	1	1	1	1	0	0	0	0	0	0
CREB3	NM_006368	NM_013497	57.7963	53.7719	44.8669	66.0044	54.4803	50.7092	2	2	0	17.5813	12.7422	-0.464424	-0.0155918	13.2026	13.8187	8.57188	-0.688944	0	0	0	0	0	0	0	0	0	0
CREB3L2	NM_001253775,NM_194071	NM_178661	64.1618	55.2363	47.0793	63.8889	55.5982	45.0246	3	0	2	4.59531	4.30859	-0.092946	0.109173	14.5891	2.66055	2.725	0.0345333	0	0	0	0	0	0	0	0	0	0
CREBBP	NM_001079846,NM_004380	NM_001025432	78.8043	52.8802	40.2574	79.4118	56.8836	44.9869	2	0	1	3.54453	5.03125	0.505322	0.0756425	5.74216	3.96563	4.05625	0.0325983	0	0	0	0	0	0	0	0	0	0
CREBL2	NM_001310	NM_177687	71.3768	53.2258	45.2533	69.5652	47.1074	36.6356	0	0	0	6.59687	6.07188	-0.119641	0.615389	0.243348	7.77031	14.7625	0.925892	1	0	0	0	1	0	0	0	0	0
CREBZF	NM_001039618,NR_028024,NR_028025,NR_028026,NR_028027	NM_145151	79.0598	71.3092	34.225	70.7224	65.8216	32.5916	2	0	2	1.72852	2.4875	0.525163	-1.63044	2.43059	1.26025	1.2708	0.0120236	0	0	0	0	0	0	0	1	0	0
CREG1	NM_003851	NM_011804	64.1026	57.1644	46.3381	76.9231	59.8793	36.6822	1	0	0	24	22.075	-0.120621	0.971719	0.489655	24	24	0	0	0	0	0	0	0	0	0	0	0
CRELD2	NM_001135101,NM_024324	NM_029720	78.7879	56.1254	42.8571	79.2593	61.7702	45.0216	0	0	0	24	20.4688	-0.229611	-0.503872	3.18521	24	24	0	0	0	0	0	0	0	0	0	0	0
CREM	NM_001267562,NM_001267563,NM_001267564,NM_001267565,NM_001267566,NM_001267567,NM_001267568,NM_001267569,NM_001267570,NM_001881,NM_181571,NM_182717,NM_182718,NM_182719,NM_182720,NM_182721,NM_182723,NM_182724,NM_182769,NM_182770,NM_182771,NM_182772,NM_183011,NM_183012,NM_183013,NM_183060,NR_051971,NR_051972,NR_051973,NR_051974,NR_051975	NM_001110859	62.4294	46.2756	36.3047	42.8571	49.2355	38.0769	1	0	0	4.03672	2.68203	-0.589857	-0.380824	NA	6.59687	9.75938	0.565006	0	0	0	0	0	0	0	0	0	0
CRIM1	NM_016441	NM_015800	75.6238	55.8446	37.4576	86.3636	53.1983	34.8398	0	0	2	9.19375	9.94844	0.113817	0.949513	NA	6.39375	8.5625	0.42137	0	0	0	0	0	0	0	0	0	0
CRIP1	NM_001311	NM_007763	65.6863	55.1282	59.633	73.6842	59.8291	58.4615	0	0	0	24	24	0	-3.85154	NA	24	24	0	0	0	0	0	0	0	0	0	0	0
CRIP2	NM_001270837,NM_001270841,NM_001312,NR_073081,NR_073082,NR_073083,NR_073084,NR_073085	NM_024223	72.0238	59.1707	56.1181	86.3636	66.6667	64.6035	0	0	0	24	24	0	-0.0799764	NA	24	24	0	0	0	0	0	0	0	0	0	0	0
CRIPT	NM_014171	NM_019936	62.7273	43.1373	39.8438	56.701	38.5621	34.5215	0	0	0	8.87187	3.87266	-1.19592	-0.809905	NA	14.4	24	0.736966	0	1	0	1	0	0	0	0	0	0
CRK	NM_005206,NM_016823	NM_133656	79.3939	56.1749	38.6807	78.6667	57.7236	43.3188	2	0	0	2.49512	1.85898	-0.424593	1.10029	2.69375	2.58516	2.18281	-0.244063	1	0	1	0	0	0	1	0	0	0
CRKL	NM_005207	NM_007764	66.8024	51.864	46.3008	72.2986	53.5088	45.1332	3	0	0	1.75508	1.6627	-0.0780116	1.87012	19.9909	1.66807	1.41899	-0.233308	0	1	0	1	0	0	0	0	0	0
CRLF3	NM_015986,NR_073118	NM_018776	78.481	50.8653	39.7773	81.6514	46.5764	35.3959	0	0	1	4.575	2.62891	-0.799309	-0.681888	NA	3.36563	4.27734	0.345841	0	1	0	1	0	0	0	0	0	0
CRLS1	NM_001127458,NM_019095	NM_001024385	58.2781	55.3728	34.4948	66.2338	52.649	38.2993	0	0	1	18.4625	3.27969	-2.49297	-0.487504	NA	16.8281	16.0375	-0.0694256	0	1	0	1	0	1	0	0	1	0
CRNKL1	NM_016652	NM_025820	60	45.3932	37.037	43.75	46.6038	34.8659	1	0	0	5.05469	3.46563	-0.544506	-0.918141	3.00943	4.84922	12.3625	1.35015	1	0	0	0	1	0	1	0	0	0
CROCC	NM_014675	NM_172122	58.7413	64.6766	54.7677	68.1159	67.889	56.2852	1	0	0	4.39844	5.26719	0.260042	0.972596	2.76112	2.46563	3.16875	0.36196	0	0	0	0	0	0	0	0	0	0
CRTAP	NM_006371	NM_019922	75	60.1829	43.7975	66.6667	57.0481	47.662	4	1	1	24	24	0	0.208671	1.22807	15.4437	24	0.636011	0	1	0	1	0	0	0	1	1	1
CRTC2	NM_181715	NM_028881	69.5473	57.5758	47.5294	77.9874	59.7022	51.9451	2	1	0	4.71797	5.17656	0.133829	0.0853736	1.54546	3.18438	3.75469	0.237683	0	0	0	0	0	0	0	0	0	0
CRTC3	NM_001042574,NM_022769	NM_173863	79.8561	59.6774	54.3325	81.7204	56.828	51.0452	1	1	0	3.45234	5.15703	0.578964	1.25309	NA	3.19492	2.84102	-0.169374	0	0	0	0	0	0	1	0	0	0
CRY1	NM_004075	NM_007771	73.4134	50.6864	33.1148	67.1875	45.1448	28.1005	0	0	2	5.23125	2.49844	-1.06613	-0.841362	3.18823	5.46797	5.64062	0.04485	0	0	0	0	0	0	0	0	0	0
CRYZ	NM_001130042,NM_001130043,NM_001134759,NM_001889	NM_009968	62.3509	51.4056	44.3723	54.721	42.9293	30.198	0	0	0	24	7.64687	-1.65009	-1.33244	NA	24	24	0	0	0	0	0	0	0	0	0	0	0
CS	NM_004077	NM_026444	67.4419	52.9749	45.2858	68.9474	50.6781	44.2599	1	0	0	24	24	0	0.984518	0.816667	24	24	0	0	0	0	0	0	0	0	0	0	0
CSAD	NM_001244705,NM_001244706,NM_015989	NM_144942	50.5952	58.9069	41.3008	55.6338	58.9251	39.033	1	0	0	4.27656	5.16563	0.272491	-0.722126	NA	1.48272	4.28594	1.53137	1	0	1	0	0	0	1	0	0	0
CSAG1	NM_001102576,NM_153478	NA	NA	NA	NA	53.5714	54.8523	48.7097	0	0	0	13.2656	24	0.855341	-0.967741	NA	24	24	0	0	0	0	0	0	0	0	0	0	0
CSDA	NM_001145426,NM_003651	NM_139117	80	62.9834	39.5869	72.428	61.0366	35.1307	1	0	0	24	12.8938	-0.896362	-1.49608	3.42636	24	24	0	0	0	0	0	0	0	0	0	0	0
CSDE1	NM_001007553,NM_001130523,NM_001242891,NM_001242892,NM_001242893,NM_007158	NM_144901,NM_001161854	44.5255	42.9704	36.8631	65.873	43.2726	36.3854	1	0	0	24	21.725	-0.143678	-0.645613	4.01884	24	24	0	0	0	0	0	0	0	0	0	0	0
CSE1L	NM_001256135,NM_001316,NR_045796	NM_023565	62.7907	41.6324	36.9128	66.6667	38.6827	35.0575	0	0	0	21.1062	10.3125	-1.03328	-1.55867	0.260824	24	24	0	0	0	0	0	0	0	0	0	0	0
CSGALNACT1	NM_001130518,NM_018371,NR_024040	NM_172753,NM_001252623	53.0664	51.7891	40.1361	52.5994	52.2201	36.1334	0	0	0	4.02734	3.13906	-0.359495	0.413083	NA	3.4875	4.71641	0.435495	0	0	0	0	0	0	0	0	0	0
CSGALNACT2	NM_018590	NM_030165	49.4764	45.3039	31.9394	45.7447	43.4009	32.8231	0	0	0	6.27031	3.59922	-0.800854	0.0777062	NA	4.67031	5.90781	0.339105	0	0	0	0	0	0	0	0	0	0
CSK	NM_001127190,NM_004383	NM_007783	73.2316	55.0628	56.3798	68.8525	58.8322	60.5839	2	1	0	7.16875	5.45078	-0.395259	2.1224	5.77394	4.04844	4.26094	0.0738057	0	0	0	0	0	0	0	0	0	0
CSNK1A1	NM_001025105,NM_001271741,NM_001271742,NM_001892	NM_146087	69.6017	45.2965	37.7093	66.8367	44.274	34.3066	1	1	0	6.51719	3.85469	-0.757636	-0.0483291	0.971451	7.2875	8.09062	0.150827	0	0	0	0	0	0	0	0	0	0
CSNK1D	NM_001893,NM_139062	NM_139059	73.75	53.4455	51.5899	72.4036	57.3984	55.4496	0	0	2	3.96719	3.89023	-0.0282598	1.75834	16.3052	2.9582	2.75898	-0.100584	0	0	0	0	0	0	0	0	0	0
CSNK1E	NM_001894,NM_152221	NM_001289898,NM_013767	82.5	57.3141	45.8547	52.2523	60.4317	50.0781	1	1	1	4.15	3.5875	-0.210133	-0.192676	2.80374	3.10977	4.12344	0.407042	0	0	0	0	0	0	0	0	0	0
CSNK1G1	NM_022048	NM_173185	54.5045	45.7246	45.1655	53.9583	45.7841	44.0443	3	1	0	2.75977	2.35547	-0.228532	0.570353	NA	2.78516	2.34023	-0.251105	1	0	1	0	0	0	0	0	0	0
CSNK1G2	NM_001319	NM_001159591	61.3924	58.6538	57.6978	74.3295	62.1795	64.2857	3	1	0	8.57188	4.66406	-0.878024	1.46709	13.2356	6.80156	4.40859	-0.625548	0	0	0	0	0	0	0	0	0	0
CSNK1G3	NM_001031812,NM_001044723,NM_001270572,NM_001270573,NM_001270574,NM_004384	NM_152809	59.2643	41.7255	38.6583	34.8178	38.7451	31.9864	1	1	1	5.64141	3.6125	-0.643057	-0.831507	NA	8.04219	11.7188	0.543159	0	0	0	0	0	0	0	0	0	0
CSNK2A1	NM_001895,NM_177559,NM_177560	NM_007788	58.3969	45.1531	42.1604	49.1561	47.6562	42.3836	0	0	2	7.46875	4.375	-0.771584	0.183683	3.80003	4.99688	6.80156	0.44484	0	0	0	0	0	0	0	0	0	0
CSNK2A2	NM_001896	NM_009974	85.7909	48.0532	50.2137	88.7324	46.8186	48.8121	0	0	0	7.20625	8.23438	0.19241	0.649105	18.0502	10.5312	11.3016	0.101845	0	0	0	0	0	0	0	0	0	0
CSNK2B	NM_001320	NM_009975	64.2045	52.3148	43.7956	0	0	0	0	0	0	24	24	0	-3.03811	0.111864	24	24	0	0	0	0	0	0	0	0	0	0	0
CSRNP2	NM_030809,NR_045072	NM_153407	72.1254	58.6916	45.658	72.0764	55.576	41.401	0	0	0	1.23286	1.79375	0.540969	0.591543	NA	1.45508	1.2916	-0.171935	0	0	0	0	0	0	0	0	0	0
CSRP1	NM_001193570,NM_001193571,NM_001193572,NM_004078	NM_007791	67.4419	55.6701	53.5971	72.7749	56.0137	54.6069	2	0	0	12.5125	21.4344	0.776557	2.84245	NA	15.9875	12.5375	-0.350695	0	0	0	0	0	0	0	0	0	0
CSRP2	NM_001321	NM_007792	70.8861	52.7491	47.7564	68.6747	49.3127	37.2881	0	0	0	19.225	6.44062	-1.57771	-1.95255	NA	24	24	0	0	0	0	0	0	0	0	0	0	0
CST3	NM_000099	NM_009976	62.3116	57.6832	52.1008	72	64.6259	61.0039	0	0	0	24	24	0	-3.70736	0.8	24	24	0	0	0	0	0	0	0	0	0	0	0
CSTB	NM_000100	NM_007793	61.4754	50.1684	40.5556	72.6415	54.8822	47.6723	0	0	0	20.0938	24	0.256288	-2.39412	0.900001	24	24	0	0	0	0	0	0	0	0	0	0	0
CSTF1	NM_001033521,NM_001033522,NM_001324	NM_024199	59.2025	53.0093	52.3237	56.5	46.4506	38.2979	0	0	0	0.456152	0.376318	-0.277562	-0.0232703	NA	1.85508	1.74473	-0.0884785	0	0	0	0	0	0	0	0	0	0
CSTF2	NM_001325	NM_133196	77.381	54.2742	36.9355	60.3448	54.4406	33.4821	0	0	0	7.05	4.10313	-0.7809	-0.964078	4.59901	8.21562	6.62188	-0.311131	0	0	0	0	0	0	0	0	0	0
CSTF2T	NM_015235	NM_031249	55.1111	55.4502	36.7774	56.5217	54.1329	34.0714	1	0	0	1.61797	0.251416	-2.68604	0.385754	0.809525	2.13164	2.36172	0.147873	0	0	0	0	0	0	0	0	0	0
CSTF3	NM_001033505,NM_001033506,NM_001326	NM_145529	60.1307	43.1291	36.2745	49.3976	41.9872	28.8591	0	0	0	4.94688	3.26484	-0.599503	-2.57673	0.157129	16.6219	24	0.529951	0	0	0	0	0	0	0	0	0	0
CTAGE5	NM_001247988,NM_001247989,NM_001247990,NM_005930,NM_203354,NM_203355,NM_203356	NM_146034	42.9907	45.4927	27.5862	68.4524	41.4493	29.0635	0	0	2	6.15	2.79609	-1.13717	-1.61494	NA	5.95469	6.90469	0.21355	0	0	0	0	0	0	0	0	0	0
CTBP1	NM_001012614,NM_001328	NM_013502,NM_001198859,NM_001198860,NM_001198861	81.1828	58.8235	48.7113	66.9211	64.9612	49.25	2	1	0	9.55	5.89531	-0.695932	1.08617	2.67288	7.74844	5.68125	-0.447697	0	0	0	0	0	0	0	0	0	0
CTBP2	NM_001083914,NM_001329,NM_022802	NM_009980	62.8176	56.0538	42.7273	60.8076	58.296	35.2307	0	0	0	4.2625	3.44375	-0.307719	0.392497	NA	4.51406	4.58594	0.0227903	0	0	0	0	0	0	0	0	0	0
CTC1	NM_025099,NR_046431	NM_001143790	58.5586	54.648	50	77.9661	56.6229	49.8065	1	0	0	2.5457	4.6	0.85357	1.08468	0.889483	2.76055	3.89375	0.496206	1	0	1	0	0	0	0	0	0	0
CTCF	NM_001191022,NM_006565	NM_181322	64.5522	48.9371	38.2195	69.1441	49.0842	39.7563	0	0	1	2.18242	2.28633	0.0671023	0.591439	2.26695	3.02969	2.68848	-0.17238	0	0	0	0	0	0	0	0	0	0
CTDNEP1	NM_001143775,NM_015343	NM_026017	73.1707	52.9252	52.305	74.2105	53.4694	52.1739	1	0	0	9.15312	7.16563	-0.353172	-0.460957	2.39926	6.42656	6.43438	0.00175265	0	0	0	0	0	0	0	0	0	0
CTDP1	NM_001202504,NM_004715,NM_048368	NM_026295	69.7987	58.5848	46.8429	52.6718	62.238	55.4167	1	0	0	3.57266	2.82227	-0.340143	2.48846	3.03019	2.03125	1.91914	-0.0819071	0	0	0	0	0	0	0	0	0	0
CTDSP1	NM_001206878,NM_021198,NM_182642	NM_153088	72.7506	59.0331	53.4979	61.3333	61.5581	59.8945	2	2	1	5.61406	5.54375	-0.0181831	2.25788	NA	3.57266	3.30859	-0.110779	0	0	0	0	0	0	0	1	0	0
CTDSP2	NM_005730	NA	NA	NA	NA	70.8885	55.5147	50.8571	3	2	0	5.17969	4.56094	-0.183535	1.04456	1.2375	4.14141	3.45156	-0.262871	0	0	0	0	0	0	0	0	0	0
CTDSPL2	NM_016396	NM_001290992,NM_212450	61.3105	42.2747	34.5056	56.25	39.4004	32.7118	0	0	1	4.59531	2.79414	-0.717758	-0.135715	NA	5.16172	9.1	0.818015	0	0	0	0	0	0	0	0	0	0
CTH	NM_001190463,NM_001902,NM_153742	NM_145953	57.4468	49.7076	31.6988	55.0505	45.7307	35.4972	0	0	0	4.84844	5.23594	0.110928	-0.674345	1.01732	NA	12.375	NA	1	0	1	0	0	0	0	0	0	0
CTIF	NM_001142397,NM_014772	NM_201354	67.9758	58.8141	54.2065	69.4737	60.8236	58.233	6	3	0	3.81484	3.51484	-0.118163	2.24691	NA	2.7793	3.10938	0.161905	0	0	0	0	0	0	0	0	0	0
CTNNA1	NM_001903	NM_009818	68.75	50.9739	40.8627	62.1053	49.8714	39.1534	0	0	0	24	13.725	-0.806228	0.882135	2.95909	24	24	0	0	0	0	0	0	0	0	0	0	0
CTNNAL1	NM_003798	NM_018761	72.973	47.8597	42.1808	80.9524	41.0884	28.7879	0	0	0	24	9.16094	-1.38947	-2.1001	0.211698	24	24	0	0	0	0	0	0	0	0	0	0	0
CTNNB1	NM_001098209,NM_001098210,NM_001904	NM_007614,NM_001165902	71.2944	51.9608	39.8181	62.3134	47.9966	33.3333	0	0	0	24	8.99062	-1.41654	0.457947	0.236205	24	19.1844	-0.323102	0	0	0	0	0	0	0	0	0	0
CTNNBL1	NM_030877	NM_025680	58.1395	54.1371	56.1997	67.033	50.5319	48.5714	0	0	0	9.09062	5.99844	-0.599793	-1.7198	8.2072	9.025	9.24062	0.0340635	0	0	0	0	0	0	0	0	0	0
CTNND1	NM_001085458,NM_001085459,NM_001085460,NM_001085461,NM_001085462,NM_001085463,NM_001085464,NM_001085465,NM_001085466,NM_001085467,NM_001085468,NM_001085469,NM_001206883,NM_001206884,NM_001206885,NM_001206886,NM_001206887,NM_001206888,NM_001206889,NM_001206890,NM_001206891,NM_001331	NM_007615,NM_001085450	53.3733	50.9052	44.8593	50.4016	50.8208	42.1309	2	1	2	4.89687	2.55234	-0.940039	0.654623	0.798204	5.89062	5.24531	-0.167392	0	0	0	0	0	0	0	0	0	0
CTNS	NM_001031681,NM_004937	NM_031251	54.1667	47.8261	50.3782	63.575	51.9022	55.7425	2	1	1	4.42891	5.60313	0.339281	1.58492	NA	3.05469	2.95	-0.0503101	1	0	1	0	0	0	0	0	0	0
CTPS1	NM_001905	NM_016748	67.3913	48.0293	43.11	69.4882	47.8041	45.9016	0	0	0	6.21563	4.77656	-0.379927	1.18067	9.91429	4.22969	4.58984	0.117894	0	0	0	0	0	0	0	0	0	0
CTPS2	NM_001144002,NM_019857,NM_175859	NM_001168568,NM_001168569,NM_018737	58.6124	45.3152	40.0356	68.0672	44.1794	40.7591	1	0	1	7.71563	5.625	-0.45593	1.08496	NA	10.425	9.19688	-0.180832	0	0	0	0	0	0	0	1	1	0
CTR9	NM_014633	NM_009431	66.129	48.5804	46.1149	67.1141	44.0943	31.9749	0	0	1	5.15156	3.14766	-0.710732	-0.832395	NA	5.92188	6.01875	0.0234099	0	0	0	0	0	0	0	0	0	0
CTRL	NM_001907	NM_023182	40.625	56.7296	42.623	60.8696	58.3648	54.3956	0	0	0	7.69688	9.75	0.341129	0.920776	NA	3.82812	NA	NA	0	0	0	0	0	0	0	0	0	0
CTSA	NM_000308,NM_001127695,NM_001167594	NM_001038492	61.7284	54.4561	55.414	65.7754	56.7802	56.6396	1	1	0	24	24	0	-0.553515	NA	24	24	0	0	0	0	0	0	0	0	0	0	0
CTSB	NM_001908,NM_147780,NM_147781,NM_147782,NM_147783	NM_007798	68.9922	51.2745	47.9666	74.0741	56.3725	49	4	2	0	24	24	0	1.75838	2.28006	24	24	0	1	1	1	1	0	0	0	0	0	0
CTSC	NM_001114173,NM_001814,NM_148170	NM_009982	60.1695	48.4521	35.5984	60.396	48.5632	28.9855	0	0	0	24	24	0	-1.56777	1.0439	24	24	0	0	0	0	0	0	0	0	0	0	0
CTSD	NM_001909	NM_009983	69.6581	52.8792	56.7322	75.9398	62.2276	64.7137	2	1	0	24	24	0	2.12983	6.08	24	24	0	0	0	0	0	0	0	0	0	0	0
CTSF	NM_003793	NM_019861	62.5899	56.0115	55.9284	77.7778	60.2749	55.2239	0	0	0	24	24	0	0.884728	NA	24	24	0	0	0	0	0	0	0	0	0	0	0
CTSL1	NM_001257971,NM_001257972,NM_001257973,NM_001912,NM_145918	NA	NA	NA	NA	65.3846	47.8044	36.1878	0	0	0	24	24	0	-1.13448	1.37096	24	24	0	0	0	0	0	0	0	0	0	0	0
CTSZ	NM_001336	NM_022325	70.922	56.6775	53.8259	79.3651	59.6491	49.5671	1	0	0	24	24	0	0.292188	3.24445	24	24	0	0	0	0	0	0	0	0	0	0	0
CTTN	NM_001184740,NM_005231,NM_138565	NM_007803	58.5542	53.8696	50.2439	61.165	55.6564	51.6878	1	1	0	14.0312	9.74375	-0.526095	0.374489	0.722505	13.05	20.25	0.633872	0	0	0	0	0	0	0	0	0	0
CTTNBP2NL	NM_018704	NM_030249,NM_001163333,NM_001163332	53.7744	55.3991	42.0475	51.7544	50.1562	37.2868	0	0	0	0.361719	4.95937	3.77722	-0.0641589	NA	2.27734	1.92481	-0.24264	1	0	1	0	0	0	0	0	0	0
CTU1	NM_145232	NM_145582	55.7895	67.1417	49.239	69.2308	76.8863	59.196	1	1	0	1.91641	1.74043	-0.138959	1.70067	NA	1.28848	1.04154	-0.306947	0	0	0	0	0	0	0	0	0	0
CTU2	NM_001012759,NM_001012762	NM_153775	75.2941	60.1294	59.6797	79.1667	64.0827	51.9685	0	0	0	7.0375	6.68906	-0.0732589	0.258167	1.60082	5.73359	4.825	-0.248911	0	0	0	0	0	0	0	0	0	0
CUEDC1	NM_001271875,NR_073495	NA	NA	NA	NA	73.913	61.671	62.9521	4	3	0	5.39219	6.26875	0.217307	2.26928	4.45564	3.6918	2.80156	-0.398091	0	0	0	0	0	0	0	0	0	0
CUEDC2	NM_024040	NM_024192,NM_001164290,NM_001164294,NM_001164291,NM_001164292,NM_001164293,NM_001164295	65.8503	57.076	54.7945	67.5497	58.7963	59.6685	0	0	0	24	7.62812	-1.65363	-0.402582	2.13025	24	24	0	0	0	0	0	0	0	0	0	0	0
CUL1	NM_003592	NM_012042	58.4615	42.471	42.1782	58.2857	43.1145	42.803	0	0	2	6.0875	3.31797	-0.875549	-0.329305	1.24865	6.99688	9.76719	0.481233	0	0	0	0	0	0	0	0	0	0
CUL2	NM_001198777,NM_001198778,NM_001198779,NM_003591	NM_029402	70.7447	39.7676	37.8745	70.4846	38.2931	34.0909	0	0	0	7.375	3.2543	-1.1803	-0.776659	4.02868	13.5312	14.1031	0.0597203	0	1	0	1	0	0	0	1	0	0
CUL3	NM_001257197,NM_001257198,NM_003590	NM_016716	85.7988	39.8353	33.6319	77.5773	39.4452	32.967	1	0	1	6.24297	3.82969	-0.705005	-1.6846	0.791012	7.42812	14.9437	1.00847	0	1	0	0	0	1	0	0	0	0
CUL4A	NM_001008895,NM_003589	NM_146207	80	50.6579	43.1074	90.9091	48.3772	37.3663	0	0	1	12.0312	5.79141	-1.0548	0.302905	NA	10.3234	12.3875	0.262961	0	0	0	0	0	0	0	0	0	0
CUL4B	NM_001079872,NM_003588	NM_001110142,NM_028288	51.5066	40.92	35.2061	57.0988	39.5833	34.9309	1	0	0	13.6312	6.375	-1.09642	-0.904212	2.35439	17.1875	24	0.481675	0	0	0	0	0	0	0	0	0	0
CUL7	NM_001168370,NM_014780	NM_025611	72.093	58.3037	47.9452	72.5904	58.9366	43.662	0	0	0	5.37109	7.06641	0.395761	1.14842	11.6709	3.42031	6.15	0.846458	0	0	0	0	0	0	0	0	0	0
CUL9	NM_015089	NM_001081335	71.7105	59.568	55.3398	80	58.287	59.1549	0	0	0	3.19687	6.425	1.00703	1.31465	4.36754	2.60625	4.05625	0.638171	0	0	0	0	0	0	0	0	0	0
CUTA	NM_001014433,NM_001014837,NM_001014838,NM_001014840,NM_015921	NM_026307	71.4286	57.6779	54.5455	59.3548	56.9002	54.6296	0	0	0	24	24	0	-2.1117	NA	24	24	0	0	0	0	0	0	0	0	0	0	0
CUTC	NM_015960	NM_001113562	72.3077	49.0842	38.1089	69.5946	47.4453	37.4372	0	0	0	6.87656	3.62344	-0.924328	-0.147721	NA	4.58828	5.675	0.306667	0	0	0	0	0	0	0	0	0	0
CUX1	NM_001202543,NM_001202544,NM_001202545,NM_001202546,NM_001913,NM_181500,NM_181552	NM_009986	72.6829	56.5522	46.0244	43.4783	55.4167	58.6406	0	0	0	10.55	8.42031	-0.325297	0.119607	7.63418	8.51094	13.0312	0.614585	0	0	0	0	0	0	0	0	0	0
CWC15	NM_016403	NM_023153	56.6474	46.087	31.0484	56.9106	43.5414	35.7798	2	0	0	5.82812	4.25469	-0.453978	-3.1014	1.1375	24	24	0	0	0	0	0	0	0	0	0	0	0
CWC25	NM_017748,NR_073428	NM_026186	53.5088	54.996	45.1149	56.2874	51.3302	43.3655	1	1	0	0.423047	3.4875	3.0433	0.314085	NA	1.29824	1.35073	0.0571821	1	0	1	0	0	0	0	0	0	0
CWC27	NM_005869	NM_026072	56.8889	45.1064	39.4495	57.0776	39.8168	32.1267	0	0	0	9.55625	5.33047	-0.842182	-2.81055	NA	24	24	0	0	0	0	0	0	0	0	0	0	0
CWF19L1	NM_018294	NM_001081077	60.2273	50.1859	45.0855	54.023	45.2072	46.6093	1	0	0	8.89219	6.65156	-0.418845	1.18645	5.25757	6.34844	5.17109	-0.295932	1	1	1	1	0	0	0	0	0	0
CXADR	NM_001207063,NM_001207064,NM_001207065,NM_001207066,NM_001338	NM_001025192	67.8571	50.7286	37.6512	78.5714	42.5873	28.4974	0	0	0	10.2188	4.26641	-1.26013	-1.06366	0.274042	8.9625	NA	NA	0	1	0	1	0	0	0	0	0	0
CXCR4	NM_001008540,NM_003467	NM_009911	60.4938	52.2222	34.0062	58.9474	50.3305	34.0385	0	0	0	0.469824	0.834656	0.82906	-1.7424	NA	1.64414	1.50381	-0.128713	0	0	0	0	0	0	0	0	0	0
CXXC1	NM_001101654,NM_014593	NM_028868	66.1891	58.2451	50	59.4816	60.1218	58.4	0	0	0	5.65937	8.1	0.517279	0.613896	2.81559	3.36133	4.10547	0.288516	0	0	0	0	0	0	0	0	0	0
CXXC5	NM_016463	NM_133687	68.5185	60.7966	45.3172	71.7241	62.9515	46.2766	0	0	0	2.75469	2.43438	-0.178338	0.571589	NA	2.51133	2.30156	-0.125837	0	0	0	0	0	0	0	0	0	0
CXorf38	NM_144970	NM_175141	63.7795	48.9097	43.6296	68.0851	51.9792	44.7734	1	0	0	4.86953	4.08125	-0.254772	1.05084	NA	4.76172	3.17109	-0.586502	1	0	1	0	0	0	1	1	0	0
CXorf40A	NM_001171907,NM_001171908,NM_001171909,NM_178124	NA	NA	NA	NA	62.1035	53.4591	43.0348	0	0	0	2.66875	4.93438	0.886703	1.47948	3.66033	1.16118	1.56035	0.426277	0	0	0	0	0	0	0	0	0	0
CXorf40B	NM_001013845	NA	NA	NA	NA	62.2093	53.4591	44.9568	0	0	0	3.49141	4.80469	0.460635	1.61357	26.9264	1.53994	2.7918	0.858319	0	0	0	0	0	0	0	0	0	0
CXorf56	NM_001170569,NM_001170570,NM_022101	NM_029951	56.1404	49.3274	37.9742	54.4304	49.0284	44.1698	0	0	1	10.5	3.90234	-1.42798	0.93747	NA	5.28047	6.68906	0.341138	1	1	1	1	0	0	0	0	0	0
CXorf61	NM_001017978	NA	NA	NA	NA	57.6271	42.9825	40	0	0	0	4.50391	19.9375	2.14624	-4.28795	NA	24	24	0	0	0	0	0	0	0	0	0	0	0
CYB561	NM_001017916,NM_001017917,NM_001915	NM_007805	75.873	56.3081	51.7035	76.9231	62.5661	54.2421	6	3	0	5.49766	9.2375	0.748686	2.00713	2.13075	3.29961	3.30273	0.0013657	1	0	1	0	0	0	0	0	0	0
CYB561D1	NM_001134400,NM_001134402,NM_001134403,NM_001134404,NM_182580	NM_001081320	61.6667	56.8116	51.7163	70.4918	60.4478	52.7547	4	2	0	1.88457	5.65937	1.58641	1.72638	6.89317	1.53018	0.860547	-0.830372	1	1	0	1	1	0	0	0	0	0
CYB561D2	NM_007022	NM_019720	54.1322	59.0433	48.5714	62.381	60.3886	51.7134	0	0	0	7.08437	5.56875	-0.347287	0.0434916	1.54369	5.39375	5.05469	-0.0936666	0	0	0	0	0	0	0	0	0	0
CYB5A	NM_001190807,NM_001914,NM_148923	NM_025797	64.539	50.1235	40.6365	77.305	50.1235	33.5616	0	0	0	22.75	6.55312	-1.79561	-2.61148	NA	24	24	0	0	0	0	0	0	0	0	0	0	0
CYB5B	NM_030579	NM_025558	62.7451	55.7823	44.4503	60.6742	49.4481	39.9038	1	0	0	8.36562	6.93281	-0.271032	1.68465	NA	9.1875	11.85	0.367143	1	0	1	0	0	0	0	0	0	0
CYB5D1	NM_144607	NM_001045525	62.5	51.2373	46.1538	52.9563	55.4585	44.5318	0	0	0	2.28828	3.78125	0.724599	0.860911	2.84078	3.00742	2.34336	-0.359949	0	1	0	1	0	1	1	0	0	0
CYB5R1	NM_016243	NM_028057	63.5659	54.2484	47.3525	67.6056	55.9913	46.6361	0	0	0	9.94844	20.5562	1.04704	1.56561	5.58888	7.71563	7.44375	-0.0517534	0	0	0	0	0	0	0	0	0	0
CYB5R3	NM_000398,NM_001129819,NM_001171660,NM_001171661,NM_007326	NM_029787	65.6522	55.4084	55.6818	84.5238	59.713	57.9928	0	0	0	24	20.8938	-0.199963	1.24304	4.51895	24	24	0	0	1	0	1	0	0	0	1	0	0
CYB5R4	NM_016230	NM_024195	77.5758	43.9193	38.6771	74.2424	39.4636	28.9617	1	0	1	24	7.08437	-1.76032	-1.31913	NA	24	24	0	0	0	0	0	0	0	0	0	0	0
CYB5RL	NM_001031672	NM_175471	48.7465	54.0856	56.3291	55.625	55.3797	51.9205	2	0	0	4.7875	6.19688	0.372268	0.832369	NA	3.73945	NA	NA	1	1	1	0	1	1	0	1	0	0
CYBA	NM_000101	NM_007806	65.7534	59.7582	52.8302	77.4648	67.8571	68.75	0	0	0	24	24	0	-3.48127	0.0450469	24	24	0	0	0	0	0	0	0	0	0	0	0
CYBASC3	NM_001161452,NM_001161454,NM_153611	NM_001282065,NM_201351,NM_001282064,NM_001282067	53.1544	55.6927	NA	63.4441	57.0645	57.3592	2	1	0	11.1375	24	1.10761	2.66494	NA	7.38438	9.02187	0.288951	0	0	0	0	0	0	0	0	0	1
CYBRD1	NM_001127383,NM_001256909,NM_024843	NM_028593	73.0964	56.0137	44.4366	72.1053	49.4774	37.5983	3	2	0	7.15	5.3125	-0.428552	-0.143549	NA	6.62656	10.1609	0.616701	0	1	0	0	0	1	0	0	0	0
CYC1	NM_001916	NM_025567	75.6098	59.1002	49.7143	81.3953	62.1677	55.5556	0	0	0	24	24	0	-0.171125	1.83334	24	16.7812	-0.516184	0	0	0	0	0	0	0	0	0	0
CYCS	NM_018947	NA	NA	NA	NA	60.5882	44.3396	40.8713	3	0	0	9.025	5.9	-0.613212	-0.469384	0.130978	24	24	0	1	1	1	1	0	0	0	0	0	0
CYFIP1	NM_001033028,NM_014608	NM_011370,NM_001164661	63.2844	49.6279	32.4211	71.1538	53.7214	35.8792	0	0	0	24	24	0	-0.0946379	2.64853	19.3125	13.6687	-0.498654	0	0	0	0	0	0	0	0	0	0
CYFIP2	NM_001037332,NM_001037333,NM_014376	NM_133769,NM_001252459,NM_001252460	66.3419	53.748	44.9966	77.5362	53.2695	43.9569	3	0	0	24	24	0	0.571078	1.58463	22.625	24	0.0851166	0	0	0	0	0	0	0	0	0	0
CYHR1	NM_001129888,NM_032687,NM_138496	NM_019396	50.2128	54.594	52.977	58.209	60.3306	66.2192	0	0	0	6.29375	7.26875	0.207787	1.14081	0.664084	3.32187	3.99844	0.267439	0	0	0	0	0	0	0	0	0	0
CYP1B1	NM_000104	NM_009994	56.1798	58.2721	38.5669	63.6816	61.2132	33.2158	0	0	0	2.00156	3.66094	0.871086	-0.215243	NA	2.00215	1.92148	-0.0593277	0	0	0	0	0	0	0	0	0	0
CYP20A1	NM_177538	NM_030013	79.3651	47.3002	37.8729	61.254	41.8287	43.1482	5	0	0	5.21484	5.10938	-0.0294773	-0.142913	NA	3.18828	3.27656	0.0394045	1	1	1	1	0	0	1	0	0	0
CYP2S1	NM_030622	NM_028775	64.2384	59.5618	51.5625	70.9091	62.8383	56.0419	0	0	0	8.27812	19.3375	1.22403	1.6274	NA	7.24688	7.21719	-0.00592217	0	0	0	0	0	0	0	0	0	0
CYP51A1	NM_000786,NM_001146152	NM_020010	67.426	46.8254	41.0606	66.6667	44.3137	36.0818	0	0	0	9.68281	7.1625	-0.434963	-0.0227776	NA	10.7344	12.0594	0.167917	0	1	0	1	0	0	0	0	0	0
CYR61	NM_001554	NM_010516	70.4663	55	44.1727	78.125	55.6719	36.8364	0	0	0	5.63281	24	2.09111	0.900918	NA	3.95234	2.48516	-0.669372	0	0	0	0	0	0	0	0	0	0
CYSTM1	NM_032412	NM_001081365	67.7419	61.6822	50	68.0672	57.1429	40.4762	0	0	0	21.6375	24	0.149501	1.24532	0.742859	24	24	0	0	0	0	0	0	0	0	0	0	0
CYTH1	NM_004762,NM_017456	NM_001112700	54.5455	52.2028	55.4595	87.3239	49.7076	55.0171	1	1	1	3.02695	2.1293	-0.507489	1.11756	6.01306	2.0416	1.77617	-0.20093	0	0	0	0	0	0	0	0	0	0
CYTH2	NM_004228,NM_017457	NM_001112701	76.9231	54.75	51.6043	66.6667	58.6035	56.8299	1	0	0	4.34219	4.49844	0.0510019	-0.162475	13.8135	2.60938	2.4166	-0.110724	0	1	0	1	0	0	0	1	1	0
CYTH3	NM_004227	NM_011182	73.057	52.1667	47.3774	81.7308	51.1667	52.5767	6	2	2	4.25156	4.18594	-0.0224424	1.83246	5.0786	2.8125	2.31016	-0.283863	0	0	0	0	0	0	0	0	0	0
D2HGDH	NM_152783	NA	NA	NA	NA	78.6127	65.2618	66.8241	1	1	0	7.68125	6.65781	-0.206293	1.66431	28.75	0.958954	3.18945	1.73378	0	0	0	0	0	0	0	0	0	0
DAB1	NM_021080	NM_177259	65.7795	52.2182	41.709	57.27	50.8993	50	0	0	0	5.56406	4.5375	-0.294241	-1.10295	NA	8.44531	NA	NA	0	0	0	0	0	0	0	0	0	0
DAB2	NM_001244871,NM_001343	NM_023118	58.8915	48.7614	39.0358	61.7702	47.6005	38.0194	1	0	1	3.97344	3.19297	-0.315489	-0.977675	NA	4.40703	4.42266	0.00510599	0	0	0	0	0	0	0	0	0	0
DAB2IP	NM_032552,NM_138709	NM_001114124	80.4878	59.6919	56.4808	66.6667	62.6949	58.1864	1	0	1	3.59141	2.62539	-0.452016	2.81819	4.86625	2.19687	1.91699	-0.196608	0	0	0	0	0	0	0	0	0	0
DAD1	NM_001344	NM_010015,NM_001113358	62.5318	56.1404	48.7468	60	52.3392	38.5455	0	0	0	24	19.5562	-0.295405	-1.82002	0.153846	24	24	0	0	0	0	0	0	0	0	0	0	0
DAG1	NM_001165928,NM_001177634,NM_001177635,NM_001177636,NM_001177637,NM_001177638,NM_001177639,NM_001177640,NM_001177641,NM_001177642,NM_001177643,NM_001177644,NM_004393	NM_010017,NM_001276481	67.5926	55.1827	49.5772	66.7954	58.1101	49.4833	1	0	0	8.70312	7.16563	-0.280441	2.44157	2.33648	6.78594	8.9625	0.401353	0	0	0	0	0	0	0	0	0	0
DAGLB	NM_001142936,NM_139179	NM_144915	70.3704	56.8159	47.0936	67.0588	56.5627	55.0624	1	0	0	3.47617	4.75547	0.452088	2.41757	3.28194	2.39961	1.8291	-0.391664	0	0	0	0	0	0	0	0	0	0
DAK	NM_015533	NM_145496	56.8182	56.4767	52.1028	67.7043	63.3681	51.906	0	0	0	15.3313	24	0.646559	0.702994	NA	24	24	0	1	0	1	0	1	0	0	0	1	0
DALRD3	NM_001009996,NM_001276405,NM_018114	NM_026378	52	58.7508	38.4615	50	61.0907	41	1	0	0	12.2656	8.90625	-0.461731	1.02914	NA	8.17656	7.8375	-0.061101	0	0	0	0	0	0	0	0	0	0
DAP	NM_004394	NM_146057	76.2791	55.9871	51.6004	82.1256	56.6343	50.7119	0	0	0	10.5	20.3656	0.955747	1.52906	1.8	7.47187	9.36875	0.326386	0	0	0	0	0	0	0	0	0	0
DAP3	NM_001199849,NM_001199850,NM_001199851,NM_004632,NM_033657	NM_022994	71.3235	49.958	47.2066	64.7727	46.6165	43.1551	0	0	0	14.15	12.5344	-0.174911	-0.367797	1.84725	13.3844	21.0938	0.656265	1	0	1	0	0	0	0	0	0	0
DAPK3	NM_001348	NM_001190474,NM_007828,NM_001190473	65.3235	63.6229	60.0791	63.4409	63.37	69.3972	1	0	0	3.52539	24	2.76718	2.525	3.54901	2.41426	2.92852	0.27859	0	0	0	0	0	0	0	0	0	0
DARS	NM_001349	NM_177445	64.0845	43.5591	28.463	66.8478	42.3639	29.1139	0	0	0	12.1969	5.375	-1.18218	-1.9921	0.784999	24	24	0	1	0	1	0	0	0	0	0	0	0
DARS2	NM_018122	NM_172644	53.69	48.1651	39.2825	53.0648	45.356	33.8498	0	0	0	17.1562	11.25	-0.608809	-0.244744	0.709318	23.0813	20.5375	-0.168461	1	0	0	0	1	0	0	0	0	0
DAXX	NM_001141969,NM_001141970,NM_001254717,NM_001350	NM_007829,NM_001199733	65.512	56.2303	37.8832	57.2254	55.7057	38.9189	0	0	0	3.95938	4.2375	0.0979407	-0.0505181	3.75986	2.85547	2.99375	0.068226	0	0	0	0	0	0	0	0	0	0
DAZAP1	NM_018959,NM_170711	NM_001122604	84.2105	60.688	47.6327	84.127	60.049	46.4332	0	0	0	10.5344	6.34687	-0.730987	0.12464	2.99294	14.4	17.2375	0.259482	0	0	0	0	0	0	0	0	0	0
DAZAP2	NM_001136264,NM_001136266,NM_001136267,NM_001136268,NM_001136269,NM_014764	NM_011873	59.5238	54.0434	42.5101	66.8478	56.0158	39.1186	0	0	0	16.0031	6.38906	-1.32468	1.12133	0.0736935	23.9812	24	0.00112755	0	0	0	0	0	0	0	0	0	0
DBF4	NM_006716	NM_013726	73.0392	43.2731	27.1845	70.0397	36.1975	34.7605	2	0	2	1.13179	1.14194	0.0128882	-1.92066	NA	3.69453	8.3375	1.17422	1	0	1	0	0	0	0	0	0	0
DBF4B	NM_025104,NM_145663,NR_036623	NA	NA	NA	NA	56.338	56.0606	53.1034	2	0	0	4.65	4.34219	-0.0988085	1.5801	0.931672	3.18633	2.35156	-0.438275	1	0	0	0	1	0	0	0	0	0
DBI	NM_001079862,NM_001079863,NM_001178017,NM_001178041,NM_001178042,NM_001178043,NM_020548	NM_007830	58.4	48.1061	43.8889	66.129	47.7273	37.2807	0	0	0	24	24	0	-1.60151	1.00017	24	24	0	0	0	0	0	0	0	0	0	0	0
DBN1	NM_004395,NM_080881	NM_019813	77.9141	59.1024	51.7632	80.2326	62.5641	55.2439	1	0	0	8.25313	5.9375	-0.475085	0.721134	10.7318	5.91563	5.63125	-0.0710754	0	0	0	0	0	0	0	0	0	0
DBNDD2	NM_001048221,NM_001048222,NM_001048223,NM_001048224,NM_001048225,NM_001048226,NM_001197139,NM_001197140,NM_018478	NM_026797,NM_001048227,NM_001048228,NM_001048229	64.3248	57.0231	47.5788	75.6757	56.3786	46.8085	1	0	0	14.4719	10.6125	-0.447488	0.34724	1.62858	3.38281	2.0125	-0.749235	0	0	0	0	0	0	1	0	0	0
DBNL	NM_001014436,NM_001122956,NM_014063	NM_001146309	72.2222	59.1994	52.2222	74.4898	61.4849	54.875	1	0	0	8.6625	12.4313	0.521116	2.71053	8.20501	7.96563	5.64219	-0.497533	0	0	0	0	0	0	0	0	0	0
DBR1	NM_016216	NM_031403	68.4615	49.9698	28.8703	57.1429	43.5474	35.2941	0	0	2	2.78437	0.429883	-2.69534	0.734839	NA	2.17734	2.46797	0.180755	0	1	0	1	0	0	0	1	0	0
DBT	NM_001918	NM_010022	59.1549	48.5162	36.205	51.5152	40.9248	39.0014	2	1	1	6.42812	7.70312	0.261046	0.529594	NA	7.42031	7.64687	0.0433902	1	1	1	1	0	0	1	1	1	1
DCAF11	NM_001163484,NM_025230,NM_181357,NR_028099,NR_028100	NM_133734,NM_001199009	55.4738	54.0606	51.1191	66.7857	55.3321	51.164	2	1	0	15.6781	24	0.614281	1.47965	3.47083	15.3	12.9281	-0.243018	1	0	1	0	0	0	0	0	0	0
DCAF12	NM_015397	NM_026893	66.0494	51.3216	44.7608	66.0819	51.0279	41.0778	2	1	0	4.0625	2.45703	-0.725452	-0.370893	0.201441	3.73828	2.9375	-0.347786	0	0	0	0	0	0	0	0	0	0
DCAF13	NM_015420	NM_198606	64.9573	44.0209	29.1667	67.509	46.9342	27.3684	0	0	0	12.975	4.8625	-1.41596	-2.27844	0.373991	24	20.5375	-0.224774	0	0	0	0	0	0	0	0	0	0
DCAF15	NM_138353	NM_172502	64	58.216	60.8466	33.3333	62.396	63.9198	2	1	0	4.75156	3.99414	-0.250517	1.1727	NA	3.28281	3.7625	0.196759	0	0	0	0	0	0	0	0	0	0
DCAF16	NM_017741	NA	NA	NA	NA	48.9161	44.5469	40.1269	1	0	1	3.48281	2.9832	-0.223391	-0.983371	0.345317	3.10508	2.52266	-0.299686	1	1	1	1	0	0	0	0	0	0
DCAF4	NM_001163508,NM_001163509,NM_015604,NM_181340,NM_181341	NM_030246,NM_001165256	55	54.2308	48.1994	57.619	55.1347	43.8389	0	0	0	3.4332	3.61016	0.072506	1.55121	2.67739	2.88398	2.59375	-0.153024	0	0	0	0	0	0	0	0	0	0
DCAF5	NM_003861	NM_177267	76.8473	55.5086	46.2636	74.4292	54.1181	41.2666	0	0	1	1.9168	4.50703	1.23348	0.0722669	3.00123	2.37949	2.16797	-0.134309	0	0	0	0	0	0	0	0	0	0
DCAF6	NM_001017977,NM_001198956,NM_001198957,NM_018442	NM_028759	73.1092	47.0544	39.162	68.8385	43.6702	30.7317	0	0	0	14.9125	7.05234	-1.08035	-1.01318	2.40004	16.025	10.7625	-0.574311	0	0	0	0	0	0	0	0	0	0
DCAF7	NM_005828,NR_073585	NM_027946	72.619	54.8105	48.5567	68.7243	53.3528	46.6719	2	0	0	5.13438	4.6	-0.158555	0.784647	1.66259	4.85781	4.52109	-0.103635	1	0	1	0	0	0	0	0	0	0
DCAF8	NM_015726,NR_028103,NR_028104,NR_028105,NR_028106	NM_153555	59.4406	53.1532	47.7844	57.0755	53.456	45.9243	4	1	0	4.48828	3.94844	-0.184881	1.07494	3.33986	4.11562	3.70469	-0.151759	0	0	0	0	0	0	0	0	0	0
DCAKD	NM_001128631,NM_024819	NM_026551	66.8224	58.7644	56.8345	65.1163	60.0575	51.4155	1	0	0	24	12.575	-0.932476	1.14213	2.06792	NA	NA	NA	0	0	0	0	0	0	1	0	0	0
DCBLD1	NM_173674	NM_025705	78.0303	51.7196	43.1884	80	47.7778	40.3433	0	0	0	3.49648	3.26562	-0.0985458	1.00336	NA	3.88672	4.06484	0.0646472	0	0	0	0	0	0	0	0	0	0
DCBLD2	NM_080927	NM_028523	79.8722	51.342	42.4581	76.0331	47.6804	34.1564	0	0	1	6.3375	5.63516	-0.169458	-0.264853	8.09711	NA	9.44844	NA	0	0	0	0	0	0	0	0	0	0
DCK	NM_000788	NM_007832	72.6923	45.7216	38.0344	74.3056	40.3576	28.7484	0	0	1	6.54531	1.7041	-1.94145	-0.581596	NA	7.62031	8.10625	0.0891844	0	0	0	0	0	0	0	0	0	1
DCLK2	NM_001040260,NM_001040261,NR_036614	NM_001195496,NM_001195497	64.2424	53.3069	52.5166	75.4642	51.4559	53.019	2	0	1	4.45859	2.39688	-0.895434	0.997501	1.54118	3.03828	2.51289	-0.273907	0	0	0	0	0	0	0	0	0	0
DCLRE1A	NM_001271816,NM_014881	NA	NA	NA	NA	38.5475	40.0576	34.1121	1	0	0	2.40078	3.10234	0.369855	-0.877815	NA	3.81875	4.57031	0.259192	0	0	0	0	0	0	0	0	0	0
DCLRE1C	NM_001033855,NM_001033857,NM_001033858,NM_022487	NM_146114	63.2353	47.1671	37.4558	70.5882	43.5305	41.3411	1	0	0	1.43672	4.02773	1.48719	0.370921	NA	2.63359	2.88477	0.131421	1	0	1	0	0	0	1	0	0	0
DCP1A	NM_018403	NM_133761	66.6667	52.9574	46.1333	60.9091	51.458	40.5249	1	0	0	2.01797	2.37188	0.233124	0.456587	0.656604	2.27969	1.69531	-0.427285	1	0	1	0	0	0	0	0	0	0
DCP2	NM_001242377,NM_152624,NR_038352	NM_027490	76.8657	46.3357	41.5746	70.5357	41.0135	36.0579	5	1	2	8.5625	5.25312	-0.704856	0.23	NA	8.22031	NA	NA	1	1	1	1	0	0	0	0	0	0
DCPS	NM_014026	NM_027030	64.5161	53.4907	42.0732	72.6444	57.6923	39.7059	0	0	0	15.1937	9.15781	-0.730403	-0.694273	NA	14.0281	13.8187	-0.0216956	0	0	0	0	0	0	0	0	0	0
DCTD	NM_001012732,NM_001921	NM_178788,NM_001161515,NM_001161516	66.0626	47.9279	47.4285	83.5366	47.3684	47.0183	0	0	0	10.8703	12.9875	0.256731	1.45386	2.26478	11.1594	16.8188	0.591814	0	0	0	0	0	0	0	0	0	0
DCTN1	NM_001135040,NM_001135041,NM_001190836,NM_001190837,NM_004082,NM_023019,NR_033935	NM_007835	60.6272	59.0744	64.1509	68.9103	56.6694	59.4203	0	0	0	24	24	0	0.663353	9.30318	24	24	0	0	0	0	0	0	0	0	0	0	0
DCTN2	NM_001261412,NM_001261413,NM_006400	NM_001190454,NM_001190453,NM_027151	70.8861	54.5079	52.5424	67.5373	51.9071	46.3224	2	2	0	22.7688	16.6406	-0.452345	0.840211	1.77438	19.1844	17.775	-0.110083	0	0	0	0	0	0	0	0	0	0
DCTN3	NM_007234,NM_024348	NM_016890	65	55.4367	52.6882	65.7143	56.328	50.6494	0	0	0	24	24	0	-1.7335	1.00002	24	24	0	0	0	0	0	0	0	0	0	0	0
DCTN4	NM_001135643,NM_001135644,NM_016221	NM_026302	60	50.8315	42.1801	62.7451	48.6623	37.5104	2	0	0	5.60625	4.30469	-0.381127	1.00617	1.10122	6.16641	6.84531	0.150687	0	0	0	0	0	0	0	0	0	0
DCTN5	NM_001199011,NM_001199743,NM_032486,NR_037573	NM_021608	58.0645	47.9053	46.5169	66.1017	47.3588	45.2976	4	3	0	3.79375	6.02969	0.668459	1.84571	NA	4.77031	4.83047	0.0180793	1	1	1	1	1	1	0	1	1	1
DCTN6	NM_006571	NM_011722	51.5493	50.7853	39.5639	57.4713	43.4555	28.7554	0	0	0	10.7531	4.63516	-1.21407	-2.79374	0.31034	24	24	0	0	0	0	0	0	0	0	0	0	0
DCTPP1	NM_024096	NM_023203	70.9302	58.6745	38.961	70.8333	61.9883	49.1589	0	0	0	5.93984	4.37188	-0.442173	1.55093	0.833332	4.29922	3.41562	-0.331925	1	0	0	0	1	0	0	0	0	0
DCUN1D1	NM_020640	NM_001205361	NA	38.5897	NA	67.3469	37.4359	31.3818	0	0	2	4.70625	2.4125	-0.964049	-1.13326	0.07614	6.14062	11.4938	0.904392	0	0	0	0	0	0	0	0	0	0
DCUN1D2	NM_001014283	NM_001024504	65.9375	47.5641	47.9835	84.6154	45.8974	46.6516	1	0	0	3.65078	5.09063	0.479638	0.364632	NA	1.50264	2.26269	0.590546	1	0	1	0	0	0	0	0	0	0
DCUN1D3	NM_173475	NM_173408,NM_001163703	62.8653	50.4918	40.4252	60.9929	53.1148	39.3488	1	1	2	0.379004	1.25718	1.7299	0.0551732	NA	1.21104	1.18047	-0.0368804	0	0	0	0	0	0	0	0	0	0
DCUN1D4	NM_001040402,NM_015115	NM_178896	69.5035	43.4585	42.6778	73.6842	39.3629	33.8764	0	0	1	5.18125	3.47031	-0.578234	-1.38812	NA	6.80469	6.48438	-0.0695615	0	0	0	0	0	0	0	0	0	0
DCUN1D5	NM_032299	NM_029775	76.1905	42.1569	35.9375	69.6793	39.916	34.4154	3	0	1	6.70156	4.19766	-0.674914	-1.08885	NA	6.425	6.74375	0.0698546	1	1	0	1	1	0	1	1	0	0
DCXR	NM_001195218,NM_016286	NM_026428	61.5385	59.8639	61.9048	73.3333	63.6735	58.2278	0	0	0	24	24	0	-0.549734	5.96215	24	24	0	0	0	0	0	0	0	0	0	0	0
DDA1	NM_024050	NM_001294259,NM_025600	76.6129	57.2816	56.0667	69.2913	54.3689	59.1046	6	3	0	4.48828	4.71406	0.070808	0.285158	2.27343	3.01641	3.26914	0.116081	0	1	0	1	0	0	0	0	0	0
DDAH1	NM_001134445,NM_012137	NM_026993	74.3316	56.6434	45.5314	77.6398	54.8951	38.7597	0	0	0	5.79453	6.7125	0.212158	0.129102	NA	7.20156	5.92812	-0.280734	0	0	0	0	0	0	0	0	0	0
DDAH2	NM_013974	NM_001190449	60.3333	62.0047	45.6522	0	0	0	0	0	0	10.5109	10.1094	-0.0561972	-0.45675	NA	19.1938	19.8	0.0448638	0	0	0	0	0	0	0	0	0	0
DDB1	NM_001923	NM_015735	64.1975	50.745	51.6129	70.9016	51.9135	50.3628	0	0	0	24	24	0	1.55945	2.70311	24	24	0	0	0	0	0	0	0	0	0	0	0
DDB2	NM_000107	NM_028119	54.2169	50.3464	48.913	60.5128	54.3614	50.6775	2	1	0	7.34531	10.85	0.562799	0.025921	3.83334	9.88594	8.53125	-0.212621	0	0	0	0	0	0	0	0	0	0
DDHD2	NM_001164232,NM_001164234,NM_015214	NM_028102	73.2673	45.2857	46.6602	75.5	43.2116	36.6576	0	0	1	24	8.95	-1.42307	-0.250289	2.33974	12.8125	11.7063	-0.130273	0	0	0	0	0	0	0	0	0	0
DDI2	NM_032341	NM_001017966	78.6667	54	46.7766	76.5258	51.5833	43.0939	1	0	0	3.37617	4.46406	0.402969	0.0578233	2.11807	2.70391	2.45469	-0.139505	0	0	0	0	0	0	0	0	0	0
DDIT3	NM_001195053,NM_001195054,NM_001195055,NM_001195056,NM_001195057,NM_004083	NM_001290183,NM_007837	51.6129	57.002	54.8223	47.7778	53.7255	45.7014	0	0	1	1.31299	24	4.19211	1.17059	10.8791	24	20.7812	-0.207752	0	0	0	0	0	0	0	0	0	0
DDIT4	NM_019058	NM_029083	64.1791	62.8986	52.2648	65.3465	65.093	50.5288	0	0	0	0.682617	2.27051	1.73387	2.04331	28.725	0.410693	0.280762	-0.548716	0	0	0	0	0	0	0	0	0	0
DDN	NM_015086	NM_001013741	76.7857	64.2288	52.6421	83.3333	67.3221	53.522	1	0	0	1.22896	1.89043	0.621282	1.20285	NA	1.21245	1.26606	0.0624239	1	0	0	0	1	0	0	0	0	0
DDOST	NM_005216	NM_007838	74.4966	55.8824	50.8527	67.8322	55.6528	47.3856	0	0	0	24	24	0	-0.149964	1.05714	24	24	0	1	0	1	0	0	0	0	0	0	0
DDR1	NM_001202521,NM_001202522,NM_001202523,NM_001954,NM_013993,NM_013994	NM_007584,NM_001198831,NM_001198833	66.3998	61.0746	54.4294	66.6667	62.9993	57.0681	3	2	0	6.875	5.625	-0.289507	1.65969	NA	5.71406	4.77031	-0.260433	0	0	0	0	0	0	0	0	0	0
DDR2	NM_001014796,NM_006182	NM_022563	47.4576	51.6569	41.4999	46.2338	50.2336	45.9716	0	0	0	6.17188	5.31562	-0.21547	-0.161079	NA	3.85469	4.72578	0.293939	0	0	0	0	0	0	0	0	0	0
DDRGK1	NM_023935	NM_029832	76.5957	57.4895	45.9184	63.6364	62.7513	50.1742	1	1	0	11.1859	9.19375	-0.282961	-0.185403	4.91999	24	24	0	0	0	0	0	0	0	0	0	0	0
DDT	NM_001084392,NM_001355	NA	NA	NA	NA	66.2338	63.0252	46.7742	0	0	0	24	24	0	-3.19452	NA	24	24	0	0	0	0	0	0	0	0	0	0	0
DDX1	NM_004939	NM_134040	76.5957	44.8943	43.6842	67.0927	42.3302	29.2683	0	0	0	24	11.4375	-1.06926	-2.2147	0.838096	24	24	0	0	0	0	0	0	0	0	0	0	0
DDX10	NM_004398	NM_029936	70.6422	44.0259	31.3788	67.6923	42.5038	41.9679	1	0	0	6.59063	3.23516	-1.02658	-1.03119	5.96051	7.19062	12.6	0.809235	0	0	0	0	0	0	0	0	0	0
DDX11	NM_001257144,NM_001257145,NM_004399,NM_030653,NM_152438	NA	NA	NA	NA	61.194	58.2293	56.7539	1	0	0	4.27734	4.85469	0.182663	1.46636	9.53651	0.825342	3.27656	1.98912	0	0	0	0	0	0	0	0	0	0
DDX17	NM_001098504,NM_006386	NM_001040187,NM_199080,NM_199079	66.5996	51.2506	44.4252	61.165	51.7352	38.7265	1	0	0	6.59375	3.88906	-0.761677	-0.644475	1.19769	7.28125	6.64219	-0.132528	0	0	0	0	0	0	0	0	0	0
DDX18	NM_006773	NM_025860	65.7895	48.0081	35.4037	58.5859	41.7784	35.8137	0	0	1	6.90937	3.20508	-1.1082	-1.57621	2.725	8	11.0719	0.468828	0	0	0	0	0	0	0	0	0	0
DDX19A	NM_018332	NM_007916	72.7273	52.4008	45.2081	60.5634	51.357	49.9282	0	0	0	5.58125	4.47422	-0.318952	1.56186	23.775	6.4125	5.79453	-0.146195	1	0	1	0	0	0	0	0	0	0
DDX19B	NM_001014449,NM_001014451,NM_001257172,NM_001257173,NM_001257174,NM_001257175,NM_007242	NM_001190800,NM_172284	71.8182	51.5278	45.1205	70.5036	50.5556	46.4	0	0	0	10.5625	10.7719	0.0283187	-0.380853	1.65785	11.1875	15.9688	0.513364	0	0	0	0	0	0	0	0	0	0
DDX20	NM_007204	NM_017397	59.1837	47.5787	38.2143	64.4258	45.2121	32.4484	1	0	0	1.64863	1.65957	0.0095392	-0.951234	NA	2.14375	1.92813	-0.152938	0	0	0	0	0	0	0	0	0	0
DDX21	NM_001256910,NM_004728	NM_019553	61.9048	49.5696	41.8649	65.0485	44.6854	34.4705	1	0	0	5.25	3.45039	-0.605558	-0.662944	4.45684	7.1875	8.53125	0.247267	0	0	0	0	0	0	0	0	0	0
DDX23	NM_004818	NM_001080981	65.6716	54.1463	52.5758	65.9341	52.8218	51.7532	0	0	0	5.40313	4.16016	-0.377156	1.21189	10.826	3.97891	4.51641	0.182803	0	0	0	0	0	0	0	0	0	0
DDX24	NM_020414	NM_020494	68.0851	51.4375	50.8475	62.6263	49.4574	42.0074	0	0	0	6.40469	3.41172	-0.908629	-1.01624	10.1125	7.05234	6.30391	-0.161857	0	0	0	0	0	0	0	0	0	0
DDX27	NM_017895	NM_153065	68.7943	55.5848	43.1034	63.9344	53.3668	39.5062	0	0	0	7.23594	5.6125	-0.366537	-1.95881	5.2597	7.13594	7.15937	0.00473057	0	0	0	0	0	0	0	0	0	0
DDX28	NM_018380	NM_028038	53.9301	57.671	40.884	55.0376	60.1356	46.0784	0	0	0	1.12617	0.357666	-1.65474	1.62768	NA	1.18071	0.912647	-0.37153	0	0	0	0	0	0	0	0	0	0
DDX31	NM_022779,NM_138620	NM_001033294	65.3944	49.3702	46.9287	60.5263	52.23	49.2201	2	0	0	3.69023	3.2957	-0.163126	1.60815	2.21272	3.23086	3.33594	0.0461747	0	0	0	0	0	0	0	0	0	0
DDX39A	NM_005804,NR_038336,NR_046366	NM_197982	62.4242	51.947	46.3768	62.7119	56.3084	57.2464	0	0	0	17.6219	10.5984	-0.733516	-1.51045	6.80015	13.2125	9.65625	-0.452369	0	0	0	0	0	0	0	0	0	0
DDX39B	NM_004640,NM_080598,NR_037852	NM_019693,NM_001252457	60.3154	53.3023	49.4104	0	0	0	0	0	0	24	12.0563	-0.993253	-1.08804	2.19234	24	11.1937	-1.10034	0	0	0	0	0	0	0	0	0	0
DDX3X	NM_001193416,NM_001193417,NM_001356	NM_010028	60.1399	46.2544	35.8203	57.076	45.9025	35.8542	0	0	2	6.95469	4.60859	-0.593659	0.241481	0.846022	5.96484	5.50078	-0.116848	0	0	0	0	0	0	0	0	0	0
DDX41	NM_016222	NM_134059	58.2781	56.1798	54.5946	61.9048	58.1059	55.1402	1	0	0	8.02187	11.275	0.491116	-1.1494	17.4571	9.66406	7.95937	-0.279975	0	0	0	0	0	0	0	0	0	0
DDX42	NM_007372,NM_203499	NM_028074	71.371	47.6703	41.0072	74.1935	48.4913	40.6964	1	0	0	3.71992	5.60234	0.590758	0.0771098	34.3182	3.74297	3.77969	0.0140841	0	0	0	0	0	0	0	0	0	0
DDX46	NM_014829	NA	NA	NA	NA	62.5	42.991	31.5811	1	0	0	15.4062	9.00781	-0.774267	-1.95046	4.72825	24	24	0	1	0	1	0	0	0	0	0	0	0
DDX47	NM_016355,NM_201224	NM_026360	70	49.4152	50.5464	54.5455	46.1257	38.1733	0	0	0	5.525	2.68086	-1.04328	0.885564	1.56664	4.93438	4.84297	-0.0269756	0	0	0	0	0	0	0	0	0	0
DDX49	NM_019070,NR_033677	NM_001024922	59.6154	57.1033	60.9034	73.1343	61.0882	63.4069	0	0	0	14.5813	24	0.71892	1.3663	6.30941	18.0938	12.4094	-0.54406	0	0	0	0	0	0	0	0	0	0
DDX5	NM_004396	NM_007840	67.1296	43.7229	35.3177	60.3239	43.5772	34.853	1	1	0	6.11562	3.71406	-0.719502	-2.01875	1.61579	7.20937	11.0031	0.609968	0	0	0	0	0	0	0	0	0	0
DDX50	NM_024045	NM_053183	75.7009	43.6735	29.7674	71.9626	42.2764	31.7972	0	0	0	6.80156	9.42656	0.470866	-1.22216	4.04999	7.87188	9.56563	0.281152	0	0	0	0	0	0	0	0	0	0
DDX51	NM_175066	NM_027156	70.2703	58.9062	44.1675	82.0513	65.917	53.0071	1	0	0	5.8625	5.70078	-0.0403564	1.7076	2.9049	3.98516	3.95	-0.0127835	1	0	1	0	0	0	1	0	1	0
DDX52	NM_007010	NM_030096	64.6552	43.6283	42.4668	59.0909	41.5556	36.2993	1	0	0	7.07812	3.99297	-0.825905	-1.01145	NA	7.575	9.30312	0.29647	1	1	1	1	1	0	1	0	0	0
DDX54	NM_001111322,NM_024072	NM_028041	100	60.419	55.7011	75	63.5712	55.6925	1	1	0	9.35625	6.64062	-0.494611	1.24172	18.1646	8.8	6.99531	-0.331115	0	0	0	0	0	0	0	1	0	0
DDX55	NM_020936	NM_026409	61.7647	52.3017	46.444	79.1667	48.863	37.7358	1	0	2	4.17422	4.29141	0.0399441	-0.493121	2.24393	2.70039	3.22266	0.255082	1	0	1	0	0	0	0	0	0	0
DDX56	NM_001257189,NM_019082	NM_026538	64.1509	54.8446	51.9084	60.3421	55.6569	58.1197	1	0	0	5.74531	6.32812	0.139393	1.34471	3.99346	4.98672	4.97891	-0.00226213	0	0	0	0	0	0	0	0	0	0
DDX6	NM_001257191,NM_004397	NM_181324,NM_007841,NM_001110826	44.9036	45.8678	42.4706	42.1053	43.5262	38.6086	1	0	2	4.7125	4.47969	-0.0730944	0.689081	0.447224	6.1875	5.98438	-0.048156	0	0	0	0	0	0	0	0	0	0
DEAF1	NM_021008	NM_001282076,NM_001282072,NM_016874	75.4839	58.7889	52.9762	70.5628	62.9564	59.3846	3	0	1	6.00156	8.50625	0.503185	1.45871	11.3272	4.89062	2.85156	-0.778266	0	0	0	0	0	0	0	0	0	0
DECR1	NM_001359	NM_026172	70.5128	46.8254	40.8357	68.7943	43.0556	30.3922	0	0	0	24	24	0	-2.55431	0.452909	24	24	0	0	0	0	0	0	0	0	0	0	0
DECR2	NM_020664	NM_011933	61.4786	52.3322	43.3873	78.3019	64.6189	56.0201	0	0	0	19.6875	11.6687	-0.75463	1.49237	0.155556	24	10.4891	-1.19415	0	0	0	0	0	0	0	0	0	0
DEDD	NM_001039711,NM_001039712,NM_032998	NM_001128609,NM_011615	66.1795	54.6499	47.3824	69.7872	55.1724	44.9486	0	0	0	2.82266	6.62188	1.23019	0.12199	NA	2.70898	2.54473	-0.090241	0	0	0	0	0	0	0	0	0	0
DEDD2	NM_001270614,NM_001270615,NM_133328,NR_073046,NR_073047,NR_073048,NR_073049,NR_073050,NR_073051,NR_073052	NM_207677	57.7778	66.566	56.7143	62.3932	67.8899	57.1598	2	0	0	1.29321	3.82266	1.56362	1.98387	2.9195	1.27041	1.26157	-0.0100716	0	0	0	0	0	0	0	0	0	0
DEF8	NM_001242816,NM_001242817,NM_001242818,NM_001242819,NM_001242820,NM_001242821,NM_001242822,NM_017702,NM_207514	NM_054046	60.5263	57.0156	53.0516	74.4681	60.101	40.458	0	0	0	14.3	14.5312	0.0231437	-0.391482	2.18238	24	24	0	0	0	0	0	0	0	0	0	0	0
DEGS1	NM_003676	NA	NA	NA	NA	75.1938	42.5926	38.7734	0	0	0	4.75703	2.29492	-1.05162	1.20192	0.670968	4.93438	18.6281	1.91654	1	0	1	0	0	0	0	0	0	0
DEK	NM_001134709,NM_003472	NM_025900	70.8661	41.7323	33.8258	69.9482	39.8936	31.4839	0	0	2	8.05	3.93594	-1.03228	-1.24125	0.353102	17.2688	21.3813	0.308183	0	0	0	0	0	0	0	0	0	0
DENND1A	NM_020946,NM_024820	NM_146122	77.6423	55.0639	54.2584	80.2575	58.5149	57.3116	3	1	0	24	9.4625	-1.34274	1.36462	NA	7.14844	16.3062	1.18973	0	0	0	0	0	0	0	0	0	0
DENND3	NM_014957	NM_001081066	73.1183	55.9477	51.2422	69.7842	55.9355	53.5714	2	0	1	3.51641	7.36875	1.06732	1.62027	NA	2.61563	2.31133	-0.178434	0	0	0	0	0	0	0	0	0	0
DENND4B	NM_014856	NM_201407	61.5385	59.4529	47.925	79.0524	61.9238	49.4975	0	0	1	4.7125	4.11875	-0.194286	1.79042	6.87621	3.18945	3.21523	0.0116147	0	0	0	0	0	0	0	0	0	0
DENND5A	NM_001243254,NM_015213	NM_021494	84.375	50.5435	44.2488	85.214	50.44	41.5184	0	0	0	8.66719	5.76719	-0.587696	0.263083	19.158	5.32109	5.81094	0.127048	0	0	0	0	0	0	0	0	0	0
DENND6A	NM_152678	NM_001285466,NM_001285467,NM_145969,NM_001134465	80.7018	46.4796	39.0874	80.2817	44.7181	37.1014	2	0	0	6.97344	4.43125	-0.654156	0.830075	NA	4.35313	5.92188	0.444003	1	1	1	1	0	0	0	0	0	0
DENR	NM_003677	NM_026603	69.6517	43.3836	39.3368	72.7941	40.0335	37.6289	2	0	3	9.9	7.12656	-0.474222	0.456515	0.547825	15.0625	14.9344	-0.0123239	1	1	1	1	0	0	1	0	0	0
DEPDC1	NM_001114120,NM_017779	NM_001172092	60.4651	36.0595	30.2696	68.3761	37.1843	31.259	0	0	0	4.72813	3.0375	-0.638384	-1.14073	NA	6.10078	22.9531	1.91163	1	0	0	0	1	0	0	1	0	0
DEPDC1B	NM_001145208,NM_018369	NM_178683	70	50.6289	44.2809	72.6027	43.5849	28.6564	0	0	2	5.2125	2.93672	-0.82777	-1.36075	1.78377	6.55312	13.2188	1.01233	0	0	0	0	0	0	0	0	0	0
DEPDC5	NM_001007188,NM_001136029,NM_001242896,NM_001242897,NM_014662	NM_001170567	56.2092	51.2772	53.5469	64.3564	52.8502	52.1415	0	0	2	1.71562	2.8918	0.753232	1.11805	6.04484	4.04063	2.68281	-0.590832	0	0	0	0	0	0	0	0	0	0
DEPTOR	NM_022783	NM_145470	67.4033	54.4715	42.0123	64.7059	53.7398	35.5848	0	0	2	6.62656	4.66719	-0.505707	0.169504	NA	4.22266	8.775	1.05525	0	0	0	0	0	0	0	0	0	0
DERA	NM_015954	NM_172733	65.1515	54.023	42.2809	83.3333	46.395	31.1811	0	0	0	24	17.1062	-0.488511	-1.55842	NA	24	24	0	0	0	0	0	0	0	0	0	0	0
DERL1	NM_001134671,NM_024295	NM_024207	77.2358	51.7196	46.8226	68.1063	48.4127	40.6045	0	0	0	6.75625	4.94766	-0.449478	0.804667	0.850031	4.69141	5.54063	0.240028	0	0	0	0	0	0	0	0	0	0
DERL2	NM_016041	NM_001291147,NM_001291148,NM_033562	71.6418	45.6944	41.1601	69.2308	45.1389	40.9207	0	0	0	7.40781	2.51133	-1.5606	-0.48091	0.464505	8.25	24	1.54057	0	0	0	0	0	0	0	0	0	0
DESI1	NM_015704	NM_134095	75.7576	54.2406	49.3943	75.2294	56.6075	49.8208	4	1	0	9.35313	11.2438	0.265603	1.06492	NA	7.7375	14.375	0.893623	1	1	1	1	0	0	0	0	0	0
DESI2	NM_016076	NM_024282	73.6979	44.4444	42.4869	77.6515	44.4444	37.4961	0	0	0	7.36328	3.90781	-0.913987	0.347631	NA	6.63281	6.94688	0.0667433	0	0	0	0	0	0	0	0	0	0
DEXI	NM_014015	NM_021428	77.4725	58.3333	55.3596	76.962	64.2361	54.1565	0	0	0	5.02969	4.00469	-0.328779	1.66913	2.03824	1.99063	2.78828	0.486154	0	0	0	0	0	0	0	0	0	0
DFFA	NM_004401,NM_213566	NM_001025296	59.0476	57.6305	49.7788	68.3673	55.4217	51.0593	1	0	0	5.91094	7.26875	0.29832	1.02123	3.85799	4.45781	5.27344	0.242408	1	0	1	0	0	0	0	0	0	0
DFFB	NM_004402	NM_007859	60.5839	57.8744	44.6254	64.7059	58.6037	45.7346	2	1	0	4.34219	5.82656	0.424223	0.96955	NA	3.2125	2.09102	-0.619492	0	1	0	1	0	0	0	0	0	0
DFNA5	NM_001127453,NM_001127454,NM_004403	NM_018769	58.7302	52.1767	41.6196	71.5909	52.0456	38.4501	0	0	0	11.3688	6.12969	-0.891188	0.977548	NA	6.65156	7.99375	0.265179	0	0	0	0	0	0	0	0	0	0
DFNB31	NM_001083885,NM_001173425,NM_015404	NM_028640	72.4234	62.9589	53.1359	72.2137	64.5742	56.3798	1	1	0	4.65547	5.04219	0.115123	0.574943	NA	2.55469	2.76484	0.114051	0	0	0	0	0	0	0	0	0	0
DGAT1	NM_012079	NM_010046	76.4706	54.1082	57.4661	73.8806	61.6905	62.7411	4	2	1	24	24	0	0.640986	NA	14.825	24	0.695002	0	0	0	0	0	0	0	0	0	0
DGAT2	NM_001253891,NM_032564	NM_026384	71.6418	55.6984	53.3409	74.5174	57.0694	50.1946	0	0	0	8.69688	4.60859	-0.91617	1.51777	NA	7.7375	11.7812	0.606553	0	0	0	0	0	0	0	0	0	0
DGCR14	NM_022719	NM_001081633,NM_022408	67.4419	57.9349	52.8882	67.5676	62.1943	57.0845	1	1	0	2.40234	2.80234	0.222191	0.649196	NA	1.06528	1.72715	0.697155	0	0	0	0	0	0	0	0	1	0
DGCR2	NM_001173533,NM_001173534,NM_001184781,NM_005137,NR_033674	NM_001109750	71.9388	57.5259	52.0314	73.7903	62.4319	58.072	6	2	1	4.14375	4.06953	-0.0260744	2.64335	18.0199	2.88906	2.85625	-0.0164794	0	0	0	0	0	0	0	0	0	0
DGCR6L	NM_033257	NA	NA	NA	NA	77.7778	64.4042	60.1831	0	0	0	24	24	0	1.37252	NA	24	24	0	0	0	0	0	0	0	0	0	0	0
DGCR8	NM_001190326,NM_022720	NM_033324	54.4811	50.0431	43.5197	58.042	54.2205	54.381	2	0	0	4.10547	8.14062	0.987593	1.58711	5.9434	2.72227	3.87812	0.510551	0	0	0	0	0	0	0	0	0	0
DGKD	NM_003648,NM_152879	NM_177646	85.7143	53.3443	50.1982	49.3671	56.0774	57.755	3	3	2	5.10781	5.45391	0.0945841	2.16745	10.6507	2.91406	2.98594	0.0351521	0	0	0	0	0	0	0	0	0	0
DGKZ	NM_001105540,NM_001199266,NM_001199267,NM_001199268,NM_003646,NM_201532,NM_201533	NM_001166597	60.9302	59.9348	57.0447	85.0394	63.0466	68.2043	1	1	0	8.81094	8.63438	-0.0292039	1.842	4.211	6.12969	6.72813	0.134391	0	0	0	0	0	0	0	0	0	0
DGUOK	NM_080916,NM_080918	NM_013764	66.25	52.8777	45.5959	62.3529	51.7544	41.7778	0	0	0	16.7625	7.93125	-1.07962	-0.548622	NA	24	24	0	0	0	0	0	0	0	0	0	0	0
DHCR24	NM_014762	NM_053272	81.3953	57.6402	55.4514	77.5194	57.8981	52.1873	5	0	0	11.5594	7.4	-0.643467	2.15084	15.4667	7.62344	11.1438	0.547721	1	0	0	0	1	0	0	0	0	0
DHCR7	NM_001163817,NM_001360	NM_007856	52.071	53.8842	51.3453	61.9048	59.1737	55.8091	1	1	0	13.9313	17.9344	0.364403	1.75058	2.57835	9.31406	6.71563	-0.471889	1	0	0	0	1	0	0	0	1	0
DHDDS	NM_001243564,NM_001243565,NM_024887,NM_205861	NM_026144	56.1404	54.5908	50.6122	57.3333	54.7904	51.5877	2	0	0	3.55664	4.79297	0.430404	1.43742	2.16293	2.91055	2.6918	-0.112721	0	1	0	1	0	0	0	0	0	0
DHFR	NM_000791	NM_010049	65.9664	44.1489	41.9059	72.561	41.6667	40.6501	1	0	1	24	22.7063	-0.0799449	-0.187305	0.773846	24	24	0	1	1	1	1	0	0	1	1	0	1
DHODH	NM_001361	NM_020046	63.4551	58.67	46.3209	57.1429	58.5859	44.7455	1	0	1	4.92422	4.16875	-0.24028	0.624955	NA	2.32891	3.39531	0.543892	1	0	1	0	0	0	0	0	0	0
DHPS	NM_001206974,NM_001930,NM_013406,NR_038192	NM_001039514	70	55.4955	45.8647	63.6364	57.7477	49.5868	0	0	0	18.175	18.75	0.0449352	-1.25359	0.547643	24	20.4688	-0.229611	0	0	0	0	0	0	0	0	0	0
DHRS1	NM_001136050,NM_138452	NM_026819	57.5646	53.7155	47.7099	63.1769	56.2633	45.5939	0	0	0	24	24	0	-1.84374	NA	24	22.3719	-0.101348	0	0	0	0	0	0	0	0	0	0
DHRS13	NM_144683	NM_183286	80.4348	60.6543	49.1007	81.8898	63.0511	53.9394	2	0	0	7.575	6.4125	-0.240359	1.9563	NA	4.85	3.15195	-0.621739	0	1	0	0	0	1	0	0	0	0
DHRS4	NM_021004	NM_001037938	64.1379	53.8095	50.6173	51.5152	58.7814	53.1863	1	0	0	24	16.3062	-0.557609	0.415487	NA	24	24	0	0	0	0	0	0	0	0	0	0	0
DHRS4L2	NM_001193635,NM_001193636,NM_001193637,NM_198083	NA	NA	NA	NA	67.6923	58.7983	53.7615	1	0	0	8.67656	0.48418	-4.16351	0.424108	NA	24	24	0	0	0	0	0	0	0	0	0	0	0
DHRS7	NM_016029	NA	NA	NA	NA	78.2609	46.9608	30.4348	0	0	0	24	14.8812	-0.689539	-1.84961	1.22105	24	24	0	0	0	0	0	0	0	0	0	0	0
DHRS7B	NM_015510	NM_145428	50.6173	53.6008	50.4	54.5455	55.5215	46.2759	0	0	0	7.86719	5.94062	-0.405233	-0.759787	NA	7.6	8.15312	0.101354	0	0	0	0	0	0	0	0	0	0
DHTKD1	NM_018706	NM_001081131	55.3719	52.3138	40.108	69.697	52.3913	43.4745	2	0	1	12.7	7.62812	-0.735428	1.24827	5.2645	NA	3.46523	NA	1	0	1	0	0	0	0	0	0	0
DHX15	NM_001358	NM_007839,NM_001042620	69.2308	43.7605	31.6372	61.3095	43.5092	32.244	0	0	0	7.11094	3.86094	-0.881088	-0.506145	0.616	7.15937	8.52031	0.251073	0	0	0	0	0	0	0	0	0	0
DHX16	NM_001164239,NM_003587	NM_026987	76.3441	58.2137	36.5854	0	0	0	0	0	0	9.46875	6.72109	-0.494478	0.147768	3.76935	5.26719	5.05625	-0.0589652	0	0	0	0	0	0	0	0	0	0
DHX29	NM_019030	NM_172594	60.3175	48.3651	40.9836	66.6667	40.219	27.9835	0	0	0	11.9781	5.63281	-1.08848	-1.47527	0.688891	16.5844	11.75	-0.497164	0	0	0	0	0	0	0	0	0	0
DHX30	NM_014966,NM_138615,NR_075079	NM_001252682	NA	55.537	NA	67.6056	59.5816	40.7895	0	0	0	5.82109	4.12344	-0.497443	0.937733	7.13936	3.93594	3.97109	0.012829	0	0	0	0	0	0	0	0	0	0
DHX32	NM_018180	NM_001286030,NM_133941	64.4068	51.3741	33.5664	39.9185	43.19	36.0231	0	0	0	4.21953	2.9625	-0.510267	-0.385773	3.21262	7.07812	5.45625	-0.375457	0	0	0	0	0	0	0	0	0	0
DHX33	NM_001199699,NM_020162	NM_178367	74.5763	53.6481	45.4756	68.1592	55.0377	43.6077	5	0	2	5.64844	4.525	-0.319934	1.32034	1.20521	3.82969	4.11875	0.10498	1	0	1	0	1	0	0	0	0	0
DHX34	NM_014681	NM_027883	54.7038	61.3147	57.8947	49.8567	63.1993	58.5448	0	0	0	5.68203	4.99531	-0.185832	2.14815	4.16177	4.81406	4.64453	-0.0517221	0	0	0	0	0	0	0	0	0	0
DHX35	NM_001190809,NM_021931,NR_033905	NM_145742	69.5122	52.1078	53.3945	56.6667	48.6269	49.8305	0	0	1	3.79375	3.25234	-0.222145	1.61811	NA	2.81641	1.82988	-0.622104	0	0	0	0	0	0	0	0	0	0
DHX36	NM_001114397,NM_020865	NM_028136	61.5385	42.5815	36.328	62.963	40.6013	32.008	1	0	0	5.01406	3.09219	-0.697352	-0.879347	NA	6.83437	9.0125	0.399118	0	0	0	0	0	0	0	0	0	0
DHX37	NM_032656	NM_203319	81.8182	58.7026	50.5185	68.6869	61.1399	61.1452	1	0	0	6.99531	6.19375	-0.175575	2.36662	9.79354	4.96719	4.85	-0.0344446	0	0	0	0	0	0	0	0	0	0
DHX38	NM_014003	NM_178380	58.5938	57.1196	53.9267	57.1831	56.8132	53.012	0	0	0	12.0719	9.14687	-0.4003	0.819212	10.1625	8.92188	7.44062	-0.261923	0	0	0	0	0	0	0	0	0	0
DHX40	NM_001166301,NM_024612	NM_026191	70.0508	43.2479	39.0282	63.2653	42.3423	35.339	0	0	0	10.0406	4.82656	-1.05678	0.305884	0.866669	10.5	17.525	0.739025	0	0	0	0	0	0	1	0	0	0
DHX57	NM_198963	NM_001163759	66.9789	49.532	46.3768	62.6263	43.6914	42.1239	1	0	1	5.44219	3.67891	-0.56491	0.0441072	NA	6.17812	4.80859	-0.361554	0	0	0	0	0	0	0	0	0	0
DHX8	NM_004941	NM_144831	59.3407	52.5569	48.497	62.5	50.6689	50.7527	0	0	0	5.68984	5.9125	0.0553792	1.51638	5.23157	4.73047	4.48594	-0.0765735	0	0	0	0	0	0	0	0	0	0
DHX9	NM_001357,NR_033302	NM_007842	59.1837	45.0626	30.5466	59.4286	44.7154	31.7518	0	0	0	24	17.2125	-0.479578	0.163547	3.08306	24	24	0	0	0	0	0	0	0	0	0	0	0
DIABLO	NM_019887,NM_138929,NR_024600,NR_024601	NM_023232	73.2143	48.8796	50.4963	68.4472	47.5	49.9305	1	1	0	5.3125	4.70312	-0.175771	0.547051	2.04163	4.46016	5.49766	0.301722	0	0	0	0	0	0	0	0	0	0
DIAPH1	NM_001079812,NM_005219	NM_007858	68.9873	50.9289	52.6437	75.8865	49.5253	51.6393	3	0	0	16.7219	11.4219	-0.549937	1.94643	6.78997	12.5344	10.5109	-0.253999	0	0	0	0	0	0	0	0	0	0
DIAPH3	NM_001042517,NM_001258366,NM_001258367,NM_001258368,NM_001258369,NM_001258370,NM_030932	NM_019670	NA	44.4255	NA	64.3836	41.8202	31.3568	0	0	0	9.00313	4.90547	-0.876035	-1.21375	1.00896	17.5938	24	0.447971	0	0	0	0	0	0	0	0	0	0
DICER1	NM_001195573,NM_001271282,NM_030621,NM_177438	NM_148948	69.1756	47.247	45.8842	37.9121	42.711	34.1452	0	0	2	4.60938	4.53125	-0.0246621	-0.91878	3.84975	4.19531	4.10781	-0.0304079	0	0	0	0	0	0	0	0	0	0
DIDO1	NM_001193369,NM_001193370,NM_022105,NM_033081,NM_080796,NM_080797	NM_175551	58.2322	53.5224	37.8182	55.0562	59.2295	35.8528	0	0	0	1.9457	2.38613	0.294383	0.366693	6.40534	1.96953	1.70781	-0.205702	0	0	0	0	0	0	0	0	0	0
DIEXF	NM_014388	NM_145415	56.5574	50.1084	47.469	53.6082	46.8516	42.4485	3	1	1	1.90371	1.69473	-0.167762	-0.695802	NA	2.45117	2.32539	-0.0759984	0	1	0	1	0	0	0	1	1	0
DIMT1	NM_014473	NM_025447	65.7895	46.9214	31.7616	71.3178	44.3737	30.2469	0	0	0	7.0375	2.60625	-1.43309	-1.89157	NA	7.54375	7.89687	0.066	0	0	0	0	0	0	0	0	0	0
DIO2	NM_000793,NM_001007023,NM_001242502,NM_001242503,NM_013989	NM_010050	54.5455	54.0574	41.231	52.9032	53.6496	37.7614	0	0	3	4.02187	3.64531	-0.141826	-0.497073	NA	5.49609	8.85625	0.688289	0	0	0	0	0	0	0	0	0	0
DIP2A	NM_001146114,NM_001146115,NM_001146116,NM_015151,NM_206889,NM_206890,NM_206891	NM_001081419	80.9524	57.1337	43.2484	74.8634	58.1001	39.3141	0	0	0	6.0375	8.26094	0.452354	0.545391	6.75052	3.79219	5.56875	0.554323	1	0	1	0	0	0	0	1	0	0
DIP2B	NM_173602	NM_001159361	78.0822	52.6138	45.5355	72.4359	50.2219	37.8004	1	0	4	6.83125	4.08125	-0.743139	1.03927	NA	5.74297	5.46797	-0.0707917	0	0	0	0	0	0	0	0	0	0
DIRC2	NM_032839	NM_153550	79.1304	55.9499	44.6266	74.1007	50.5219	38.1034	0	0	0	10.6562	6.20547	-0.780088	0.140657	NA	8.65	8.7875	0.0227527	0	0	0	0	0	0	0	0	0	0
DIS3	NM_001128226,NM_014953	NM_028315	69.0722	45.8464	37.9679	59.0909	41.1887	37.9923	2	0	2	4.425	3.62031	-0.289563	-0.735774	1.22917	5.72344	7.85313	0.456385	1	1	1	0	0	1	0	1	0	1
DIS3L	NM_001143688,NM_133375	NM_001001295	80.1587	51.265	42.1603	80	46.1295	45.0512	0	0	0	6.63281	4.87266	-0.444912	0.235527	2.52919	5.74922	7.325	0.349463	1	0	1	0	0	0	0	0	0	0
DIS3L2	NM_001257281,NM_001257282,NM_152383,NR_046476,NR_046477	NM_153530	61.6	52.0857	48.9914	63.7681	53.9127	54.7535	2	0	0	6.32344	6.56172	0.0533647	1.06825	12.2834	5.70312	4.49062	-0.344836	0	0	0	0	0	0	0	0	0	0
DIXDC1	NM_001037954,NM_033425,NR_075084	NM_178118	63.0769	52.6217	41.6207	69.697	49.8781	39.1317	0	0	0	4.82031	4.00312	-0.268	0.842733	NA	4.375	5.73125	0.389567	1	0	1	0	0	0	0	0	0	0
DKC1	NM_001142463,NM_001363	NM_001030307	59.3023	45.1634	37.3031	73.8095	47.9612	39.6594	0	0	0	8.85625	5.56328	-0.67076	0.348946	4.02708	7.27656	7.07812	-0.0398899	0	0	0	0	0	0	0	0	0	0
DLAT	NM_001931	NM_145614	67.8344	52.4624	37.8906	63.1259	48.714	31.0384	0	0	1	14.4187	7.38125	-0.966009	-0.0394966	0.469561	14.7406	16.525	0.164852	0	0	0	0	0	0	0	0	0	0
DLD	NM_000108	NM_007861	62.2449	42.6797	31.9739	61.8182	41.4379	34.4507	2	0	0	17.8	5.84375	-1.60691	-0.652551	1.96667	23.8125	24	0.0113153	0	0	0	0	0	0	0	1	0	0
DLG1	NM_001098424,NM_001204386,NM_001204387,NM_001204388,NM_004087	NM_001252433,NM_007862	75.4777	45.4741	38.5304	61.0526	40.8361	33.1071	0	0	0	7.37969	4.91563	-0.586185	-0.643449	NA	9.15781	17.925	0.968898	0	0	0	0	0	0	0	0	0	0
DLG3	NM_001166278,NM_020730,NM_021120	NM_001177778	72.4928	53.6683	46.5194	64.1509	47.5023	47.7019	3	3	0	3.56211	3.90937	0.134206	0.765357	NA	3.97344	4.34219	0.128034	0	0	0	0	0	0	0	0	0	0
DLG4	NM_001128827,NM_001365	NM_001109752	68.9427	56.4174	55.675	72.0779	57.8947	57.5275	2	1	0	5.15625	4.35156	-0.244789	1.42951	3.2127	3.06797	3.86563	0.333418	0	0	0	0	0	0	0	0	0	0
DLG5	NM_004747	NM_001163513	80.4255	57.4749	47.8638	92.8571	59.4618	46.2098	1	0	0	7.13125	8.49844	0.253043	1.56567	7.5652	5.01328	5.15859	0.0412228	0	0	0	0	0	0	0	0	0	0
DLGAP4	NM_001042486,NM_014902,NM_183006	NM_146128	70.3883	60.5908	53.8356	64.3373	59.9853	54.0473	0	0	1	3.6	5.47344	0.60445	0.466759	NA	3.43047	3.44648	0.00671949	1	0	0	0	1	0	0	0	0	0
DLGAP5	NM_001146015,NM_014750	NM_144553	56.6667	49.1553	40.9283	55.2995	38.5923	31.3609	0	0	0	9.94844	4.21406	-1.23926	-2.86335	2.54552	18.6187	24	0.366278	0	0	0	0	0	0	0	0	0	0
DLST	NM_001244883,NM_001933,NR_033814,NR_045209	NM_030225	73.4375	52.5275	49.1031	69.8413	52.2026	50.9527	2	2	0	7.11719	7.75781	0.124343	2.20784	7.74467	5.51953	4.91563	-0.167171	0	0	0	0	0	0	0	0	0	0
DMAP1	NM_001034023,NM_001034024,NM_019100	NM_023178	59.0476	55.5082	50	70.8333	57.9772	60.6557	0	0	1	7.10781	4.69609	-0.597944	-0.727889	1.11653	5.025	5.75156	0.19483	0	0	0	0	0	0	0	0	0	0
DMBT1	NM_004406,NM_007329,NM_017579	NM_007769	66.6667	51.8576	45.5243	38.6792	55.3938	52.071	0	0	0	2.09687	12.2859	2.5507	1.58897	NA	0.657373	1.80547	1.45759	1	0	0	0	1	0	0	0	0	0
DMD	NM_000109,NM_004006,NM_004007,NM_004009,NM_004010,NM_004011,NM_004012,NM_004013,NM_004014,NM_004015,NM_004016,NM_004017,NM_004018,NM_004019,NM_004020,NM_004021,NM_004022,NM_004023	NM_007868	38.785	43.1095	36.6767	67.9487	48.6897	33.3589	0	0	0	6.61562	4.57188	-0.533091	-0.751927	NA	4.80156	6.05625	0.334921	0	0	0	0	0	0	0	0	0	0
DMKN	NM_001035516,NM_001126056,NM_001126057,NM_001126058,NM_001126059,NM_001190347,NM_001190348,NM_001190349,NM_033317,NR_033746	NM_001166174	52.8	55.6005	49.5298	54.8387	54.5614	55.2795	0	0	0	24	24	0	-0.150866	1.40229	24	24	0	0	0	0	0	0	0	0	0	0	0
DMPK	NM_001081560,NM_001081562,NM_001081563,NM_004409	NM_032418	67.8082	61.3397	58.1363	72.6829	64.8148	64.026	1	0	0	6.79375	5.07734	-0.420134	2.42704	22.9242	3.39219	4.64687	0.454045	0	0	0	0	0	0	0	0	0	0
DMTF1	NM_001142326,NM_001142327,NM_021145,NR_024549,NR_024550	NM_011806	58.9041	44.4444	36.4007	52.6427	43.1402	35.5705	0	0	0	4.56719	4.32031	-0.0801703	-1.29793	3.82688	3.47148	3.64062	0.0686336	0	0	0	0	0	0	0	0	0	0
DMWD	NM_004943	NM_010058	90.4762	64.014	53.4216	84.7826	68.642	60.7114	3	1	0	5.56016	6.39844	0.202594	1.59406	10.9391	3.19453	4.23281	0.406013	0	0	0	0	0	0	0	0	0	0
DNA2	NM_001080449	NM_177372	71.6418	51.8658	37.6443	57.7982	39.7424	29.4359	0	0	1	5.28281	4.48906	-0.234892	-1.0052	NA	4.75703	7.54219	0.664922	0	0	0	0	0	0	0	0	0	0
DNAAF2	NM_001083908,NM_018139	NM_027269	58.3333	60.4908	40.5743	62.963	57.9554	22.5543	0	0	1	1.24121	2.11719	0.770401	-1.43278	NA	1.31221	1.41982	0.113717	0	0	0	0	0	0	0	0	0	0
DNAJA1	NM_001539	NM_008298,NM_001164671,NM_001164672	67.8013	42.6298	39.0869	69.9454	43.2161	32.2981	0	0	0	6.63281	4.50156	-0.559195	-2.15931	0.826667	14.3594	24	0.741041	0	0	0	0	0	0	0	0	0	0
DNAJA2	NM_005880	NM_019794	83.3333	45.7627	37.8173	74.6479	45.5206	33.9532	0	0	0	6.46875	3.52813	-0.874585	-1.11236	0.263415	6.69531	6.83125	0.0289981	0	0	0	0	0	0	0	0	0	0
DNAJA3	NM_001135110,NM_005147	NM_023646	73.4375	52.5988	46.8011	79.2208	56.094	50.7463	3	1	1	5.12812	5.3125	0.0509595	1.77275	2.64865	3.36406	4.38828	0.383451	0	0	0	0	0	0	0	0	0	0
DNAJA4	NM_001130182,NM_001130183,NM_018602	NM_021422	79.4118	51.5913	45.3935	83.7607	49.9162	43.2028	1	0	0	5.4375	11.9	1.12995	0.388065	NA	5.14531	5.63281	0.130597	0	0	0	0	0	0	0	0	0	0
DNAJB1	NM_006145	NM_018808	73.2484	53.9589	51.2465	82.5	55.2297	49.4872	0	0	1	0.706714	1.69141	1.25902	1.84681	1.81539	1.19294	1.35547	0.184266	0	0	0	0	0	0	0	0	0	0
DNAJB11	NM_016306	NM_026400,NM_001190804,NM_001190805	74.6193	49.8607	44.6768	70.9091	46.4253	32.6531	0	0	0	24	11.8187	-1.02196	-2.54757	0.308109	24	24	0	0	0	0	0	0	0	0	0	0	0
DNAJB12	NM_001002762,NM_017626	NM_019965	76.9231	57.3828	50.0474	54.6667	59.4309	55.3356	1	0	2	4.95625	5.49219	0.148132	1.80109	3.18632	4.45859	5.64062	0.339266	0	0	0	0	0	0	0	0	0	0
DNAJB2	NM_001039550,NM_006736	NM_178055,NM_001159884,NM_001159885	70.5298	55.8753	NA	75.9494	57.4341	60.2436	4	3	0	3.65859	11.0312	1.59224	2.49063	8.92783	1.08584	1.40947	0.376344	0	0	0	0	0	0	0	0	0	0
DNAJB4	NM_007034	NM_025926,NM_027287	53.7566	43.0966	33.8572	38.3648	39.4477	27.8195	0	0	0	0.37041	0.223975	-0.725789	-1.17728	NA	2.87148	4.675	0.70317	0	0	0	0	0	0	0	0	0	0
DNAJB6	NM_005494,NM_058246	NA	NA	NA	NA	63.871	43.3884	33.0383	0	0	0	4.88516	7.25312	0.570198	-0.849132	7.3248	3.89062	4.22656	0.119483	0	0	0	0	0	0	0	0	0	0
DNAJC1	NM_022365	NM_007869,NM_001190817	73.6442	47.4382	45.0946	75.9582	49.3093	25.8993	0	0	0	9.6375	6.45078	-0.579185	-2.28422	1.6	22.5	24	0.0931094	0	0	0	0	0	0	0	0	0	0
DNAJC10	NM_001271581,NM_018981,NR_073365,NR_073366,NR_073367	NM_024181	62.2177	43.073	41.347	60.0619	38.8329	33.9329	1	0	0	19.3	18.4812	-0.0625385	-0.837072	1.87063	24	24	0	1	0	1	0	0	0	0	0	0	0
DNAJC11	NM_018198	NM_172704	66.129	54.6429	52.3776	71.6981	53.0357	57.7969	2	0	0	6.48438	6.27813	-0.0466338	2.24882	13.3728	5.38359	5.28437	-0.0268368	0	0	0	0	0	0	0	0	0	0
DNAJC12	NM_021800,NM_201262	NM_013888	56.2963	52.4288	33.7522	40.4762	45.5611	30.8725	0	0	0	7.375	1.35049	-2.44916	-0.593689	NA	13.3156	14.425	0.115451	0	0	0	0	0	0	0	0	0	0
DNAJC13	NM_015268	NM_001163026	71.8367	45.0089	40.5797	67.6923	41.1319	34.5333	0	0	1	24	11.4125	-1.07242	-0.292064	2.07448	14.5437	24	0.722635	0	0	0	0	0	0	0	0	0	0
DNAJC14	NM_032364	NM_028873	63.4146	53.8826	40.0983	69.6078	53.4376	45.1327	1	1	0	2.86875	2.29004	-0.32505	1.00712	1.96683	2.46074	2.82031	0.196762	0	1	0	1	0	0	0	0	0	0
DNAJC15	NM_013238	NM_025384	66.6667	48	48.8889	59.601	46.5784	35.64	1	0	0	24	7.87188	-1.60826	-2.54563	NA	24	24	0	0	0	0	0	0	0	1	1	0	0
DNAJC16	NM_015291	NM_172338	64.6875	53.4713	49.8799	66.6667	46.1047	41.676	0	0	0	2.925	2.48418	-0.235667	-0.079959	8.70295	3.12344	3.10391	-0.00905003	0	1	0	1	0	0	0	0	0	0
DNAJC17	NM_018163	NM_139139	36.6667	55.7018	46.9697	56.25	56.612	42.2535	0	0	0	4.49609	7.08125	0.655332	-1.8163	2.6185	4.79922	5.76562	0.264677	0	0	0	0	0	0	0	0	0	0
DNAJC19	NM_001190233,NM_145261,NR_033721,NR_033722,NR_033723,NR_046073	NM_026332	72.4638	43.8746	30.7692	65.6977	41.3105	34.086	0	0	1	17.3125	4.95625	-1.80449	-2.61803	0.39479	24	24	0	0	1	0	1	0	0	0	1	0	0
DNAJC2	NM_001129887,NM_014377	NM_009584	74.3719	42.5509	35.2941	64.9402	39.3891	22.1053	0	0	0	6.375	4.01328	-0.667643	-2.9757	6.93376	7.89375	24	1.60425	0	0	0	0	0	0	0	0	0	0
DNAJC21	NM_001012339,NM_194283	NM_030046	86.4516	46.5539	27.5081	84.5815	42.7318	35.2235	1	0	0	7.73438	5.37031	-0.526279	-2.40871	NA	11.1859	24	1.10135	1	1	1	0	1	1	1	0	0	0
DNAJC24	NM_181706	NM_026992	56.7677	45.4139	29.4118	58.6207	37.7778	37.1405	0	0	1	6.21719	3.08438	-1.01128	-0.2851	NA	4.08125	3.98516	-0.0343749	1	1	1	1	0	0	0	0	0	0
DNAJC25	NM_001015882,NR_037148	NM_001033165	81.3559	54.7486	41.5917	73.2143	50.7849	31.178	0	0	0	13.625	8.08125	-0.753606	-0.6905	1.2666	9.88594	24	1.27958	0	0	0	0	0	0	0	0	0	0
DNAJC3	NM_006260	NM_008929	75.1592	47.8548	40.2217	72.6496	40.8581	38.5198	0	0	0	7.25625	4.63281	-0.647336	0.0451916	NA	6.62188	9.12187	0.462091	0	1	0	1	0	0	0	0	0	0
DNAJC5	NM_025219	NM_016775,NM_001271585,NM_001271584	67.1237	52.5963	48.1272	80.6867	57.9564	56.8452	8	2	2	4.22578	6.36875	0.591792	2.55857	9.84987	2.72539	2.8668	0.0729765	0	0	0	0	0	0	0	0	0	0
DNAJC7	NM_001144766,NM_003315,NR_029431	NM_019795	63.1206	47.4747	44.8399	49.3088	44.7229	47.1154	0	0	0	10.2031	6.83281	-0.57846	-0.507459	1.05799	18.2219	11.4437	-0.671112	0	0	0	0	0	0	0	0	0	0
DNAJC8	NM_014280	NM_172400	58.3333	45.9318	47.2637	69.697	43.4383	44.4788	1	0	0	11.3187	4.58906	-1.30244	-1.32014	0.569231	24	15.8438	-0.599121	1	0	0	0	1	0	0	0	0	0
DNAJC9	NM_015190	NM_134081	68.5039	49.6154	41.1602	66.6667	51.2133	41.6667	0	0	1	4.28281	4.95625	0.21069	0.347293	2.96667	5.34844	6.50547	0.282535	0	0	0	0	0	0	0	0	0	0
DNASE1L1	NM_001009932,NM_001009933,NM_001009934,NM_006730	NM_027109,NM_001172154	50.4545	49.5238	40.9674	65.3968	60.066	51.1232	2	1	0	24	24	0	1.28095	2.22088	24	24	0	0	0	0	0	0	0	0	0	0	0
DNASE1L2	NM_001374	NM_025718	46.087	53.7634	53.0444	69.9248	65.6667	65.529	0	0	0	1.4707	5.50938	1.90538	0.575369	NA	1.18701	NA	NA	0	0	0	0	0	0	0	0	0	0
DNASE2	NM_001375	NM_010062	61.5741	55.6497	50.8009	61.6438	59.9261	48.7805	0	0	0	17.85	24	0.42711	1.36132	1.32501	24	24	0	1	0	1	0	1	0	0	0	0	0
DND1	NM_194249	NM_173383	40.625	60.8121	50.8333	59.0909	65.2542	54.9296	1	1	0	3.45312	5.87031	0.765535	1.47598	2.55148	2.93711	3.34297	0.186733	0	0	0	0	0	0	0	0	0	0
DNER	NM_139072	NM_152915	67.9513	56.2331	33.5135	78.9116	56.3686	32.6015	0	0	0	24	24	0	-0.0355346	NA	NA	24	NA	0	0	0	0	0	0	0	0	0	0
DNLZ	NM_001080849,NR_073565	NM_026828,NM_001139504	64.2857	62.3596	54.2907	77.3196	69.8324	55.3571	0	0	0	10.475	18.1281	0.79128	-1.5202	NA	17.8313	24	0.428627	0	0	0	0	0	0	0	0	0	0
DNM1	NM_001005336,NM_004408	NM_010065	80	58.343	56.1243	82.7586	59.4834	55.2434	0	0	0	24	24	0	1.25551	NA	24	24	0	0	0	0	0	0	0	0	0	0	0
DNM1L	NM_005690,NM_012062,NM_012063	NM_001025947	69.697	43.9524	36.1872	72.0497	42	37.5893	1	0	1	9.11875	6.12344	-0.574494	-0.385888	NA	13.2594	14.7688	0.155534	1	0	1	0	0	0	0	0	0	0
DNM2	NM_001005360,NM_001005361,NM_001005362,NM_001190716,NM_004945	NM_001039520	71.3415	55.8621	58.5598	79.4737	58.8889	65.5852	1	1	1	14	8.89375	-0.654563	2.28013	13.57	10.0188	7.90469	-0.341922	0	0	0	0	0	0	0	0	0	0
DNMBP	NM_015221	NM_028029	53.8462	55.1339	64.2857	70.6522	51.0984	46.1245	4	1	0	3.22812	1.78965	-0.851021	1.38902	2.22819	2.35957	1.9041	-0.309413	0	1	0	1	0	0	0	0	0	0
DNMT1	NM_001130823,NM_001379	NM_010066,NM_001199431	62.5	54.2875	40.6349	69.4444	55.8854	37.0717	0	0	0	12.0312	8.32656	-0.530994	-0.117509	15.456	14.075	13.8938	-0.0186989	0	0	0	0	0	0	0	0	0	0
DNMT3A	NM_022552,NM_153759,NM_175629,NM_175630	NM_007872	69.4656	57.5724	48.9695	71.1864	58.1031	42.9439	0	0	0	7.05938	7.35313	0.058817	0.415425	6.22035	4.13828	3.99531	-0.0507231	0	0	0	0	0	0	0	0	0	0
DNMT3B	NM_001207055,NM_001207056,NM_006892,NM_175848,NM_175849,NM_175850	NM_001003960	70.6601	53.6905	46.882	78.8162	57.4146	44.8039	0	0	0	4.93438	3.78281	-0.383408	1.09747	NA	3.40469	2.45	-0.474741	0	0	0	0	0	0	0	0	0	0
DNPEP	NM_012100	NM_001110831	73.0408	56.9328	46.9201	76.7123	58.5048	49.2806	3	0	0	15.0875	10.3891	-0.538289	0.098445	1.14667	10.0531	9.36562	-0.102198	1	0	1	0	0	0	0	0	0	0
[truncated: 6,429 more rows]
