# Supplementary material for: A GC-rich sequence feature in the 3′ UTR directs UPF1-dependent mRNA decay in mammalian cells
Source: HighWire-hosted journal article supplement (doi:10.1101/gr.206060.116), 2016-12-09
Supplement: Supplemental_Table_S4.xlsx [file Supplemental_Table_S4.xlsx]

## Sheet: Supplemental Table S4
Supplemental Table S4. Characterization of 246 UPF1 targets
Gene symbol	RefSeq_ID (Human)	RefSeq_ID (Mouse)	Accession No.(Predicted PTC-containing isoforms)
ABHD4	NM_022060	NM_134076	NA
ACACB	NM_001093	NM_133904	ENST00000538526
ADM5	NM_001101340	NA	NA
ADO	NM_032804	NM_001005419	NA
AEN	NM_022767	NM_026531	NA
AHRR	NM_001242412,NM_020731	NM_009644	NA
AIF1L	NM_001185095,NM_001185096,NM_031426,NR_033701	NM_145144	NA
AMIGO3	NM_198722	NM_177275	NA
AMMECR1L	NM_001199140,NM_031445	NM_001242430,NM_153515	NA
AMOTL2	NM_016201	NM_019764	NA
ANKRD52	NM_173595	NM_172790	NA
AP3S2	NM_005829,NR_023361,NR_037582	NM_009682	ENST00000558999|ENST00000560251|NR_023361
AP5S1	NM_001204446,NM_001204447,NM_018347	NM_027129	NA
ARFRP1	NM_001134758,NM_001267544,NM_001267545,NM_001267546,NM_001267547,NM_001267548,NM_001267549,NM_003224,NR_051954,NR_051955,NR_051956,NR_051957,NR_051958	NM_001165991,NM_001165992,NM_029702	NR_051954|NR_051955|NR_051956|NR_051957|NR_051958
ARMC7	NM_024585	NM_177778	NA
ATF3	NM_001030287,NM_001040619,NM_001206484,NM_001206486,NM_001206488,NM_001674	NM_007498	ENST00000464547
ATF5	NM_001193646,NM_012068	NM_030693	NA
ATP6V0E2	NM_001100592,NM_145230	NM_133764	ENST00000464683|ENST00000471877
BAK1	NM_001188	NM_007523	NA
BANP	NM_001173539,NM_001173540,NM_001173541,NM_001173542,NM_001173543,NM_017869,NM_079837	NM_016812,NM_001110100	ENST00000466197|ENST00000485772
BBS4	NM_001252678,NM_033028,NR_045565,NR_045566	NM_175325	ENST00000562084|ENST00000569440|NR_045565|NR_045566
BHLHA15	NM_177455	NM_010800	NA
BRD2	NM_001113182,NM_001199455,NM_001199456,NM_005104,NR_037625	NM_010238,NM_001204973	ENST00000495733|NR_037625|NR_037625_1|NR_037625_3|NR_037625_4|NR_037625_5|NR_037625_6
BRF2	NM_018310	NM_025686	ENST00000522539
C10orf76	NM_024541	NM_198296	NA
C11orf68	NM_001135635,NM_031450	NM_001256515,NM_134149	NA
C11orf84	NM_138471	NM_001033139,NM_001167831	NA
C14orf79	NM_174891	NM_145450	ENST00000389964
C15orf39	NM_015492	NM_028820	NA
C19orf21	NM_173481	NM_030218	NA
C19orf25	NM_152482	NM_025521	NA
C19orf48	NM_199249,NM_199250	NA	NA
C1orf35	NM_024319	NM_024210	NA
C3orf18	NM_001171740,NM_001171741,NM_001171743,NM_016210	NM_175486	ENST00000430746
C3orf52	NM_001171747,NM_024616	NM_145389	ENST00000480282
C8orf58	NM_001013842,NM_001198827,NM_173686	NM_001004155	NA
CACNB1	NM_000723,NM_199247,NM_199248	NM_145121	NA
CACNB3	NM_000725,NM_001206915,NM_001206916,NM_001206917	NM_001286226,NM_007581	ENST00000550483|ENST00000551544
CALHM2	NM_015916,NR_024552,NR_046344	NM_133746	NA
CAMTA2	NM_001171166,NM_001171167,NM_001171168,NM_015099	NM_001190376	NA
CCDC94	NM_018074	NM_028381	NA
CD99L2	NM_001184808,NM_001242614,NM_031462,NM_134445,NM_134446	NM_001199349	NA
CDT1	NM_030928	NM_026014	NA
CEMP1	NM_001048212	NA	NA
CENPBD1	NM_145039	NA	NA
CHFR	NM_001161344,NM_001161345,NM_001161346,NM_001161347,NM_018223	NM_001289580,NM_172717	NA
CHID1	NM_001142674,NM_001142675,NM_001142676,NM_001142677,NM_023947	NM_001142681	ENST00000528426
CHST3	NM_004273	NM_016803	NA
CLSTN1	NM_001009566,NM_014944	NM_023051	NA
COMMD5	NM_001081003,NM_001081004,NM_014066	NA	ENST00000530332
CUL9	NM_015089	NM_001081335	NA
CYB561D1	NM_001134400,NM_001134402,NM_001134403,NM_001134404,NM_182580	NM_001081320	NA
CYB5R1	NM_016243	NM_028057	NA
CYBASC3	NM_001161452,NM_001161454,NM_153611	NM_001282065,NM_201351,NM_001282064,NM_001282067	NA
CYP2S1	NM_030622	NM_028775	ENST00000595590
DAPK3	NM_001348	NM_001190474,NM_007828,NM_001190473	NA
DDIT3	NM_001195053,NM_001195054,NM_001195055,NM_001195056,NM_001195057,NM_004083	NM_001290183,NM_007837	NA
DDIT4	NM_019058	NM_029083	NA
DEDD2	NM_001270614,NM_001270615,NM_133328,NR_073046,NR_073047,NR_073048,NR_073049,NR_073050,NR_073051,NR_073052	NM_207677	NR_073046|NR_073049|NR_073051
DENND3	NM_014957	NM_001081066	ENST00000518198
DMBT1	NM_004406,NM_007329,NM_017579	NM_007769	NA
DNAJB1	NM_006145	NM_018808	NA
DNAJB2	NM_001039550,NM_006736	NM_178055,NM_001159884,NM_001159885	NA
DTX2	NM_001102594,NM_001102595,NM_001102596,NM_020892	NM_001256096	ENST00000435251
DUSP1	NM_004417	NM_013642	NA
DUSP2	NM_004418	NM_010090	NA
E2F1	NM_005225	NM_007891	NA
EFNA1	NM_004428,NM_182685	NM_010107	NA
ERF	NM_006494	NM_010155	NA
EVC	NM_153717	NM_021292	NA
FADD	NM_003824	NM_010175	NA
FAM108B1	NM_001025780,NM_016014	NM_146096	NA
FAM168A	NM_015159	NM_178764	NA
FAM193A	NM_001256666,NM_001256667,NM_001256668,NM_003704,NR_046335,NR_046336	NM_001243123	NR_046336
FAM43A	NM_153690	NM_177632	NA
FAM53B	NM_014661	NM_175268,NM_212473	NA
FBF1	NM_001080542	NM_172571	ENST00000588283
FBXL12	NM_017703	NM_013911	ENST00000589438|ENST00000590808|ENST00000592732
FHL3	NM_001243878,NM_004468	NM_010213	NA
FUK	NM_145059	NM_172283	ENST00000498702
GADD45B	NM_015675	NM_008655	NA
GATA2	NM_001145661,NM_001145662,NM_032638	NM_008090	NA
GBA2	NM_020944	NM_172692	NA
GFER	NM_005262	NM_023040	NA
GFOD2	NM_001243650,NM_030819,NR_027398	NM_027469	ENST00000602496
GLTPD1	NM_001029885	NM_024472	NA
GPN2	NM_018066	NM_133884	NA
GPR157	NM_024980	NM_177366	NA
H2AFX	NM_002105	NM_010436	NA
HINFP	NM_001243259,NM_015517,NM_198971	NM_172162	NA
HIST3H2A	NM_033445	NM_178218	NA
HSPG2	NM_005529	NM_008305	NA
IER2	NM_004907	NM_010499	NA
ING5	NM_032329	NM_025454	NA
INHBE	NM_031479	NM_008382	NA
IQCC	NM_001160042,NM_018134	NM_198026	NA
IRGQ	NM_001007561	NM_153134	NA
IRS2	NM_003749	NM_001081212	NA
ITPKC	NM_025194	NM_181593	NA
ITPRIP	NM_001272012,NM_001272013,NM_033397	NM_001001738	NA
JRK	NM_001077527,NM_003724	NM_008415	NA
JUN	NM_002228	NM_010591	NA
JUNB	NM_002229	NM_008416	NA
KCTD7	NM_001167961,NM_153033	NM_172509	ENST00000503687
KIAA0040	NM_001162893,NM_001162894,NM_001162895,NM_014656	NA	NA
KLF10	NM_001032282,NM_005655	NM_013692	NA
KLHL17	NM_198317	NM_198305	NA
LAMA5	NM_005560	NM_001081171	ENST00000370691|ENST00000474128
LAMC3	NM_006059	NM_011836	NA
LCAT	NM_000229	NM_008490	ENST00000573538|ENST00000575467
LDLR	NM_000527,NM_001195798,NM_001195799,NM_001195800,NM_001195802,NM_001195803	NM_001252659,NM_010700,NM_001252658	NA
LRRK1	NM_024652	NM_146191	ENST00000525284|ENST00000526457
LTBP3	NM_001130144,NM_001164266,NM_021070	NM_008520	NA
MAP3K12	NM_001193511,NM_006301	NM_009582,NM_001163643	ENST00000552365
MAP3K14	NM_003954	NM_016896	NA
MAST3	NM_015016	NM_199308	NA
MED15	NM_001003891,NM_015889	NM_001285884,NM_033609	ENST00000420849|ENST00000441501
MFI2	NM_005929,NM_033316	NM_013900	NA
MGAT5B	NM_001199172,NM_144677,NM_198955	NM_172948	ENST00000565043
MID1IP1	NM_001098790,NM_001098791,NM_021242	NM_026524,NM_001166635	NA
MIER2	NM_017550	NM_027422	NA
MLL4	NM_014727	NM_029274	NA
MOAP1	NM_022151	NM_022323,NM_001142937	NA
MOB2	NM_001172223,NM_053005	NM_028308	NA
MRC2	NM_006039	NM_008626	NA
MRM1	NM_024864	NM_145433	NA
MVD	NM_002461	NM_138656	ENST00000565610|ENST00000567064|ENST00000568133
MVK	NM_000431,NM_001114185	NM_023556	ENST00000537237|ENST00000545774
NAT9	NM_015654	NM_025400	ENST00000584022
NCOR2	NM_001077261,NM_001206654,NM_006312	NM_011424	NA
NOD1	NM_006092	NM_172729,NM_001171007	ENST00000434755
NPHP4	NM_015102	NM_153424	ENST00000466897|ENST00000489180
NPIP	NM_006985	NA	NA
NUDT16L1	NM_001193452,NM_032349	NM_025839	NA
OGFOD2	NM_024623	NM_025671	ENST00000540324
OSGIN1	NM_182981	NM_027950	NA
P4HA3	NM_182904	NM_177161	ENST00000524388|ENST00000532689
PCSK6	NM_002570,NM_138319,NM_138320,NM_138321,NM_138322,NM_138323,NM_138324,NM_138325	NM_011048	NA
PEA15	NM_003768	NM_011063	NA
PFKFB4	NM_004567	NM_173019	ENST00000417753|ENST00000445633
PGAP3	NM_033419	NM_001033537	ENST00000577337|ENST00000584620
PLAU	NM_001145031,NM_002658	NM_008873	NA
PLD6	NM_178836	NM_001290283,NM_183139	NA
PLEKHG3	NM_015549	NM_153804	NA
PLXND1	NM_015103	NM_026376	NA
POFUT2	NM_015227,NM_133635,NR_004858	NM_030262	NA
PPP1R15A	NM_014330	NM_008654	NA
PPP1R18	NM_001134870,NM_133471	NM_175242,NM_001146710,NM_001146711	NA
PPP1R37	NM_019121	NM_199149	NA
PPP6R2	NM_001242898,NM_001242899,NM_001242900,NM_014678	NM_026813	NA
PRDM11	NM_001256695,NM_001256696,NR_046338	NM_001177536	NR_046338
PRKCE	NM_005400	NM_011104	NA
PRKRIP1	NM_024653	NM_025774	NA
PRR5L	NM_001160167,NM_001160168,NM_001160169,NM_024841	NM_175181,NM_001083810,NM_001110849	NA
PTK6	NM_001256358,NM_005975	NM_009184	NA
PTPN18	NM_001142370,NM_014369	NM_011206	ENST00000428843
PYGB	NM_002862	NM_153781	NA
RAB3D	NM_004283	NM_031874	NA
RASSF1	NM_001206957,NM_007182,NM_170712,NM_170713,NM_170714	NM_001243748	NA
RFNG	NM_002917	NM_009053	NA
RGS3	NM_001276260,NM_001276261,NM_001276262,NM_017790,NM_021106,NM_130795,NM_134427,NM_144488,NM_144489,NR_074077,NR_074078	NM_134257	NR_074077
RNF123	NM_022064	NM_032543	ENST00000457726
RNF19B	NM_001127361,NM_153341	NM_029219	NA
RUNX3	NM_001031680,NM_004350	NM_019732	NA
SAP30BP	NM_013260	NM_020483	ENST00000293208|ENST00000580322|ENST00000583170|ENST00000583737
SCD	NM_005063	NA	NA
SDHAF1	NM_001042631	NM_001033140	NA
SEMA3B	NM_001005914,NM_004636	NM_009153,NM_001291539,NM_001042779	NA
SERTAD1	NM_013376	NM_018820	NA
SESN2	NM_031459	NM_144907	NA
SGK1	NM_001143676,NM_001143677,NM_001143678,NM_005627	NM_011361	NA
SGSM3	NM_015705	NM_134091	NA
SH3BP2	NM_001122681,NM_001145855,NM_001145856,NM_003023	NM_001145858	ENST00000513020|ENST00000515737
SLC25A25	NM_001006641,NM_001006642,NM_001265614,NM_052901,NR_049766	NM_001164358	ENST00000472769
SLC45A4	NM_001080431	NM_001033219	NA
SLC9A8	NM_001260491,NM_015266,NR_048537,NR_048538,NR_048539,NR_048540	NM_148929	NA
SMG5	NM_015327	NM_178246	NA
SNAI1	NM_005985	NM_011427	NA
SPEG	NM_001173476,NM_005876	NA	ENST00000403148|ENST00000420132|ENST00000452101
ST3GAL3	NM_001270459,NM_001270460,NM_001270461,NM_001270462,NM_001270463,NM_001270464,NM_001270465,NM_001270466,NM_006279,NM_174963,NM_174964,NM_174965,NM_174966,NM_174967,NM_174968,NM_174969,NM_174970,NM_174971,NR_073016,NR_073017,NR_073018,NR_073019,NR_073020,NR_073021,NR_073023	NM_001285520,NM_009176,NM_001161774	ENST00000461066|ENST00000479383|ENST00000530154|ENST00000532911|NR_073018|NR_073021
ST3GAL4	NM_001254757,NM_001254758,NM_001254759,NM_006278	NM_009178	ENST00000534733
STK16	NM_001008910,NR_026909	NM_011494,NM_001277992	NR_026909
STX1A	NM_001165903,NM_004603	NM_016801	NA
SUN2	NM_001199579,NM_001199580,NM_015374	NM_001205346	NA
SUV420H2	NM_032701	NM_146177,NM_001115018	NA
SWI5	NM_001040011	NM_175190	NA
SZT2	NM_015284	NM_198170	ENST00000406439
TADA2A	NM_001166105,NM_001488,NM_133439	NM_172562	ENST00000490992
TADA2B	NM_152293	NM_001170454	NA
TANGO2	NM_152906	NA	ENST00000399807
TBX3	NM_005996,NM_016569	NM_011535	NA
TFEB	NM_001167827,NM_001271943,NM_001271944,NM_001271945,NM_007162	NM_001161722,NM_001161723	NA
THAP3	NM_001195752,NM_001195753,NM_138350	NM_175152	ENST00000487819
THAP7	NM_001008695,NM_030573	NM_026909	NA
THEM6	NM_016647	NM_198607	NA
TIMM10B	NM_012192	NM_019502	NA
TLX3	NM_021025	NM_019916	NA
TMBIM1	NM_022152	NM_027154	NA
TMEM129	NM_001127266,NM_138385	NM_026698	ENST00000480360
TMEM222	NM_032125,NR_037576,NR_037577,NR_037580	NM_025667	NR_037576|NR_037577|NR_037580
TMEM234	NM_019118	NM_029748	ENST00000461402|ENST00000483001|ENST00000489170|ENST00000491434
TMEM25	NM_001144034,NM_001144035,NM_001144036,NM_001144037,NM_001144038,NM_032780	NM_027865	NA
TMEM41A	NM_080652	NM_025693	ENST00000382227
TMEM63A	NM_014698	NM_144794	NA
TMEM79	NM_032323,NR_026678	NM_024246	NR_026678
TNPO2	NM_001136195,NM_001136196,NM_013433	NM_145390,NM_001122843	ENST00000589572
TRIM35	NM_171982	NM_029979	NA
TRMT61A	NM_152307	NM_001099793,NM_177374,NM_001099792	NA
TSC22D1	NM_001243797,NM_001243798,NM_001243799,NM_006022,NM_183422	NM_207652	ENST00000486464
TTC31	NM_022492,NR_027749	NA	ENST00000449459
TUFT1	NM_001126337,NM_020127	NM_001293728,NM_011656	NA
TXNL4B	NM_001142317,NM_001142318,NM_017853	NM_175646	ENST00000565171
UBALD2	NM_182565	NM_176902	NA
UBR4	NM_020765	NM_001160319	NA
UCN2	NM_033199	NM_145077	NA
ULK1	NM_003565	NM_009469	NA
UNC119B	NM_001080533	NA	NA
UPP1	NM_003364,NM_181597	NM_009477,NM_001159401,NM_001159402	ENST00000421046
URM1	NM_001135947,NM_001265582,NM_030914,NR_049743	NM_026615	NA
USP35	NM_020798	NM_001177412	NA
USP36	NM_025090	NM_001033528	ENST00000587010|ENST00000587379|ENST00000589225|ENST00000591052
ZBTB17	NM_001242884,NM_003443	NM_009541	NA
ZFP36L2	NM_006887	NM_001001806	NA
ZFP41	NM_001271156,NM_173832	NM_011759,NM_001044718	NA
ZFYVE27	NM_001002261,NM_001002262,NM_001174119,NM_001174120,NM_001174121,NM_001174122,NM_144588	NM_001164531	NA
ZMIZ2	NM_031449,NM_174929	NM_028601	NA
ZNF142	NM_001105537,NR_073599,NR_073600	NM_029888	ENST00000450765|NR_073599|NR_073600
ZNF212	NM_012256	NM_001145881,NM_145576	ENST00000462724|ENST00000486371|ENST00000488917
ZNF213	NM_001134655,NM_004220	NM_001033496	NA
ZNF276	NM_001113525,NM_152287	NM_020497	ENST00000562530|ENST00000563541
ZNF317	NM_001190791,NM_020933	NM_172918	ENST00000591278
ZNF324B	NM_207395	NA	NA
ZNF335	NM_022095	NM_199027	NA
ZNF500	NM_021646	NA	NA
ZNF556	NM_024967	NA	NA
ZNF629	NM_001080417	NM_177226	NA
ZNF641	NM_001172681,NM_001172682,NM_152320	NM_173769	NA
ZNF672	NM_024836	NM_178761,NM_001256520,NM_001256517,NM_001256516,NM_001256519,NM_001256518	NA
ZNF687	NM_020832	NM_030074	ENST00000449313
ZNF689	NM_138447,NR_073480,NR_073481,NR_073482	NM_175163	NR_073481
ZNF696	NM_030895	NA	NA
ZNF697	NM_001080470	NM_172863	NA
ZNF707	NM_001100598,NM_001100599,NM_173831	NM_001081065	ENST00000525862|ENST00000527293|ENST00000528456
ZNF747	NM_023931	NA	NA
ZNF783	NM_001195220	NA	ENST00000378052|ENST00000476295|ENST00000481519
ZZEF1	NM_015113	NM_001045536	ENST00000571436|ENST00000572699|ENST00000572831
