# Supplementary material for: A GC-rich sequence feature in the 3′ UTR directs UPF1-dependent mRNA decay in mammalian cells
Source: HighWire-hosted journal article supplement (doi:10.1101/gr.206060.116), 2016-12-09
Supplement: Supplemental_Table_S5.xlsx [file Supplemental_Table_S5.xlsx]

## Sheet: Sheet1
Supplemental Table S5. GO term enrichment analysis for UPF1 targets (246 genes)
Term	Term name	Number of Genes	%	Fold Enrichment	P-Value	Adjusted
						P-value (Benjamini)
GO:	transcription	52	22.22	1.86	6.72e-06	0.00853
6350
GO:	regulation of	16	6.84	3.63	3.41e-05	0.0215
51726	cell cycle
GO:	regulation of transcription	56	23.93	1.62	0.000141	0.0584
45449
