# Supplementary figures and images for: A GC-rich sequence feature in the 3′ UTR directs UPF1-dependent mRNA decay in mammalian cells
Source: PubMed Central journal article supplement — Genome Res. 2017 Mar;27(3):407–18. doi: 10.1101/gr.206060.116 (PMC5340968; doi:10.1101/gr.206060.116), 2017-03

# Supplemental Fig S1.

**A**

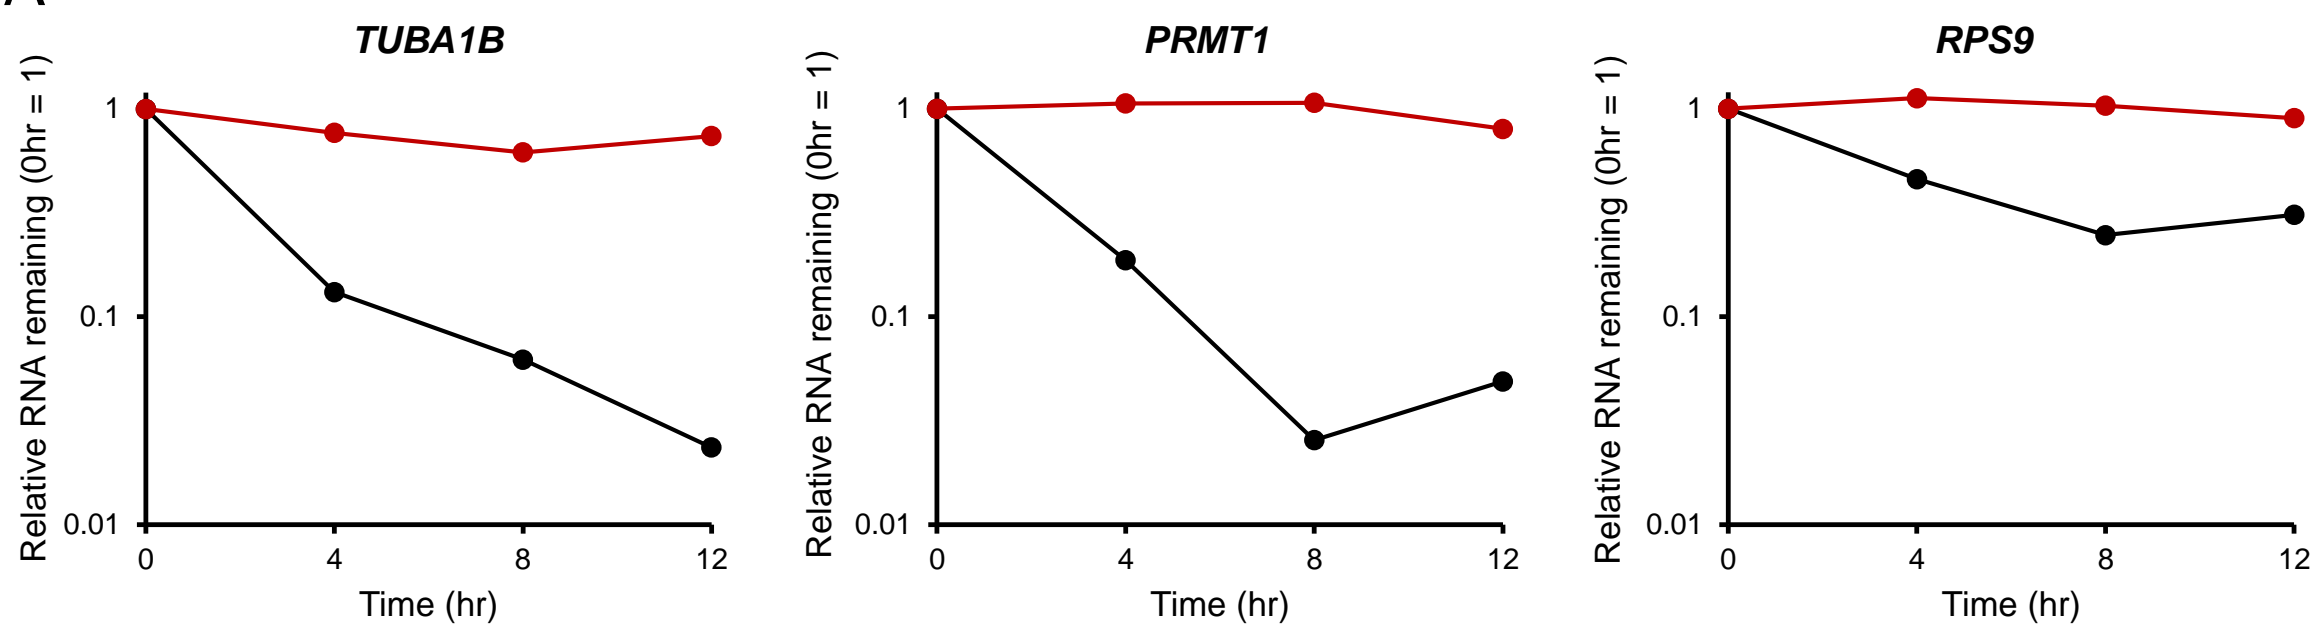

**B**

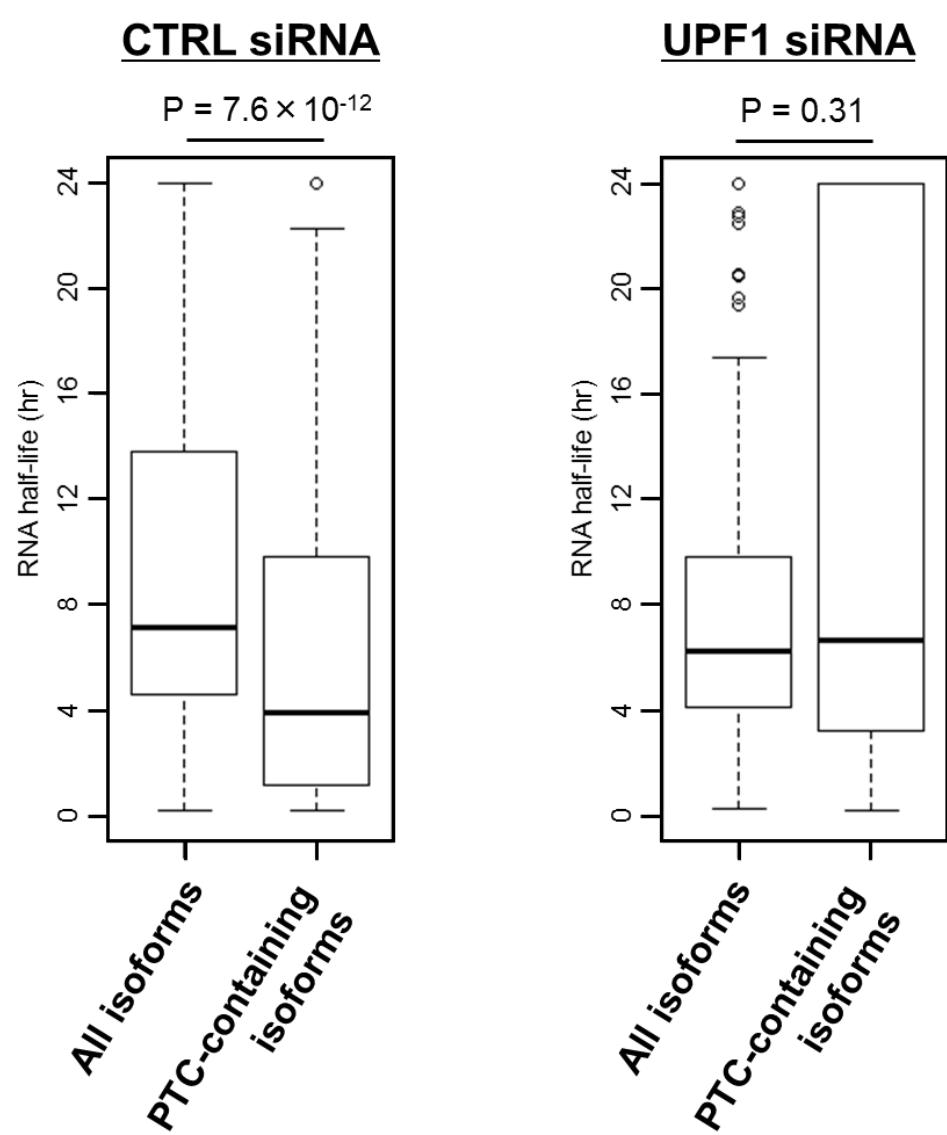

Supplement: supp_gr.206060.116_Supplemental_Fig_S1.pdf [file supp_gr.206060.116_Supplemental_Fig_S1.pdf]

## Supplemental Fig S11.

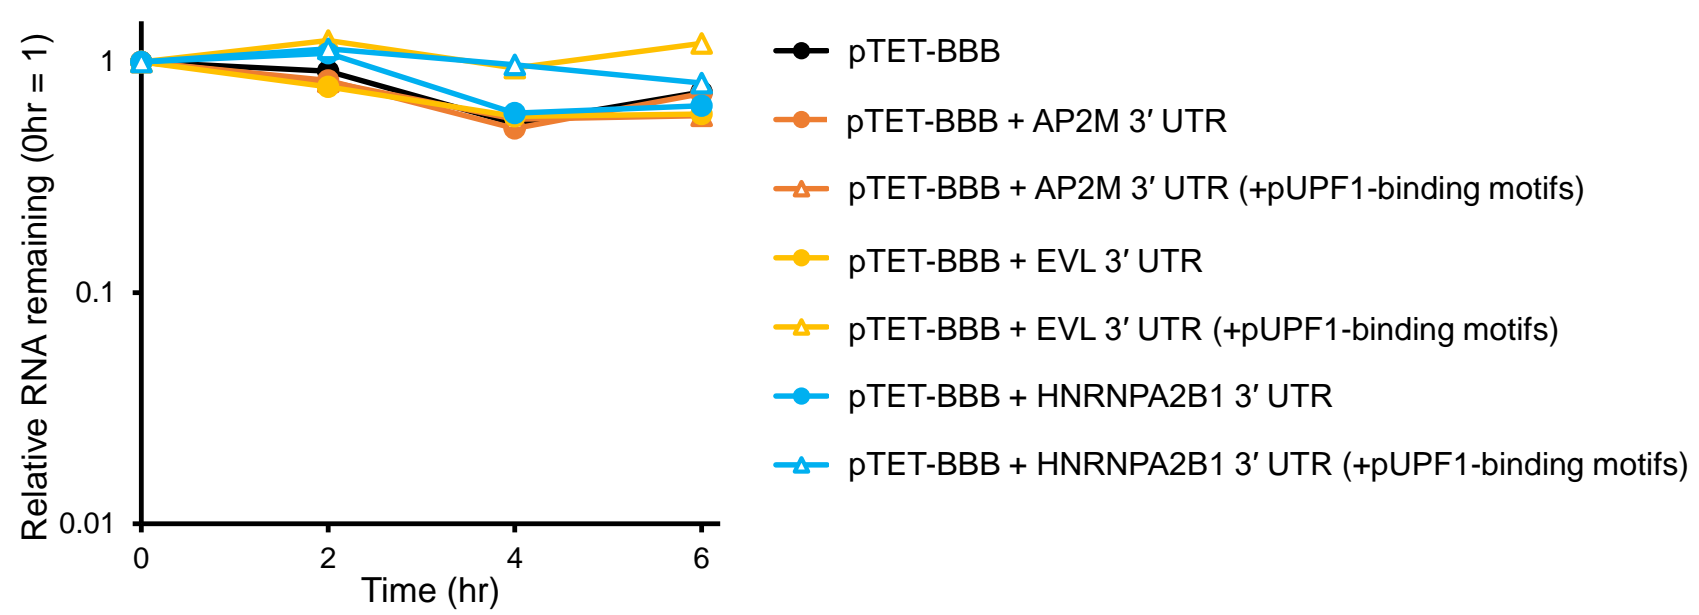

Supplement: supp_gr.206060.116_Supplemental_Fig_S11.pdf [file supp_gr.206060.116_Supplemental_Fig_S11.pdf]

# Supplemental Fig S2.

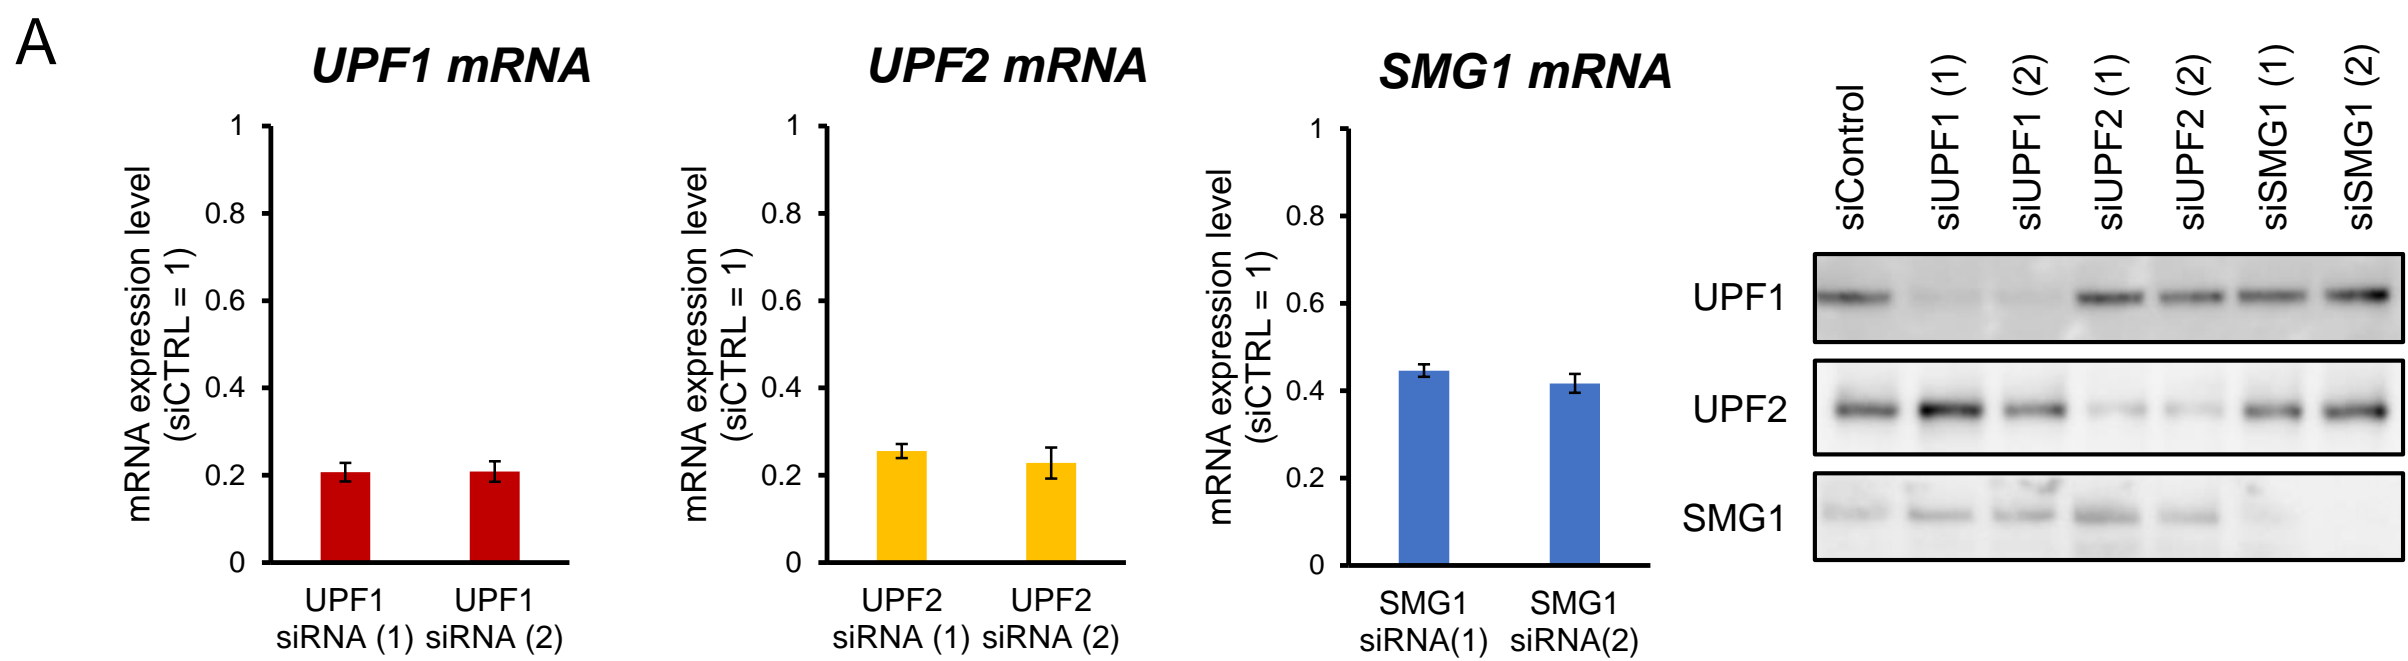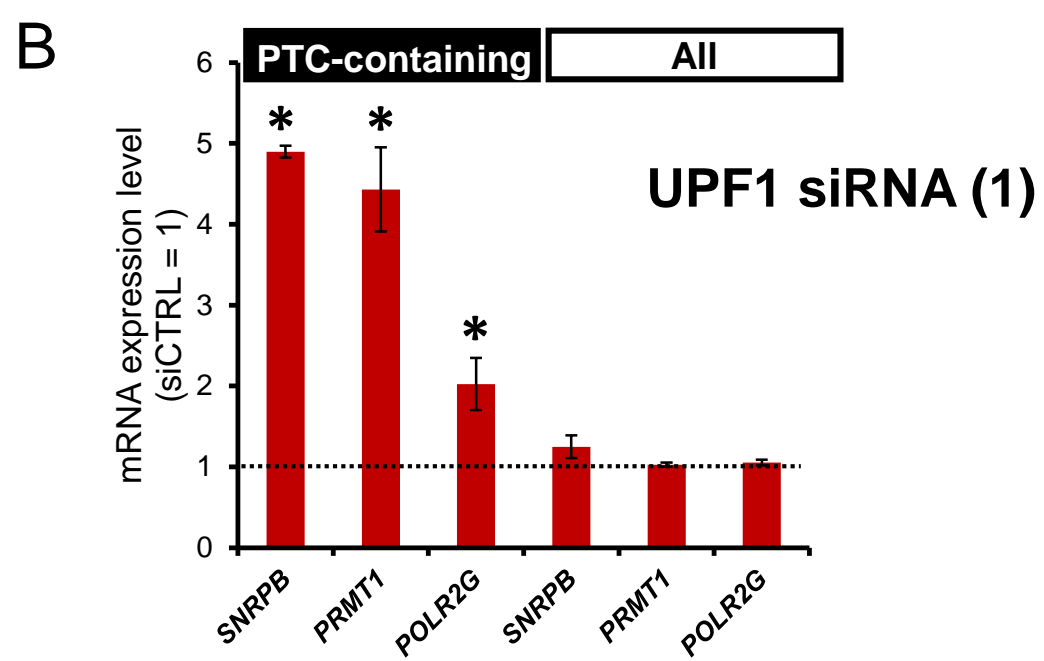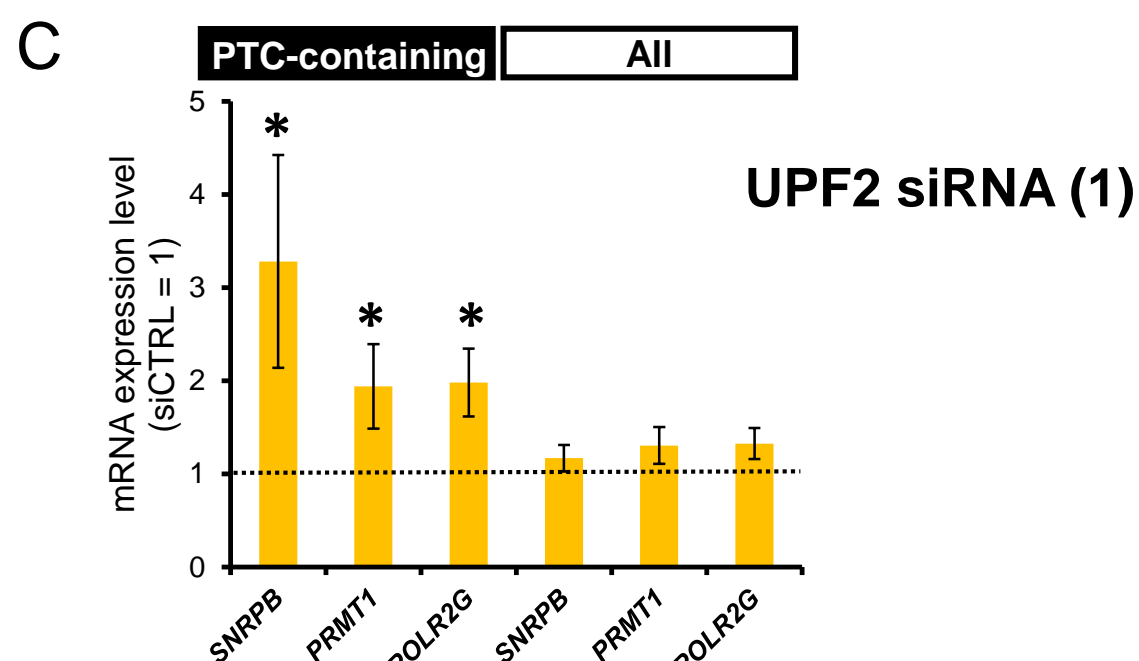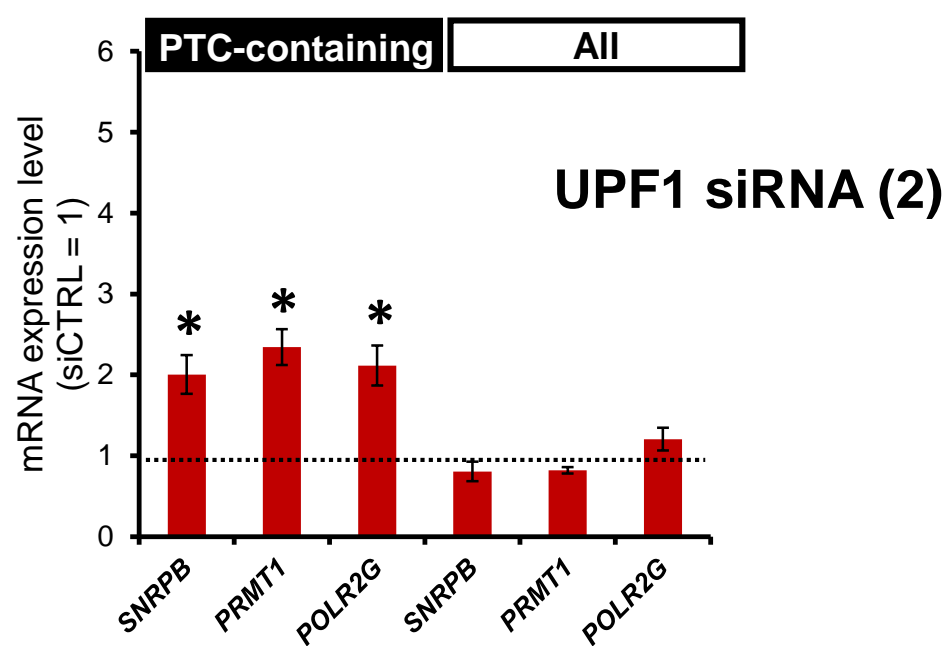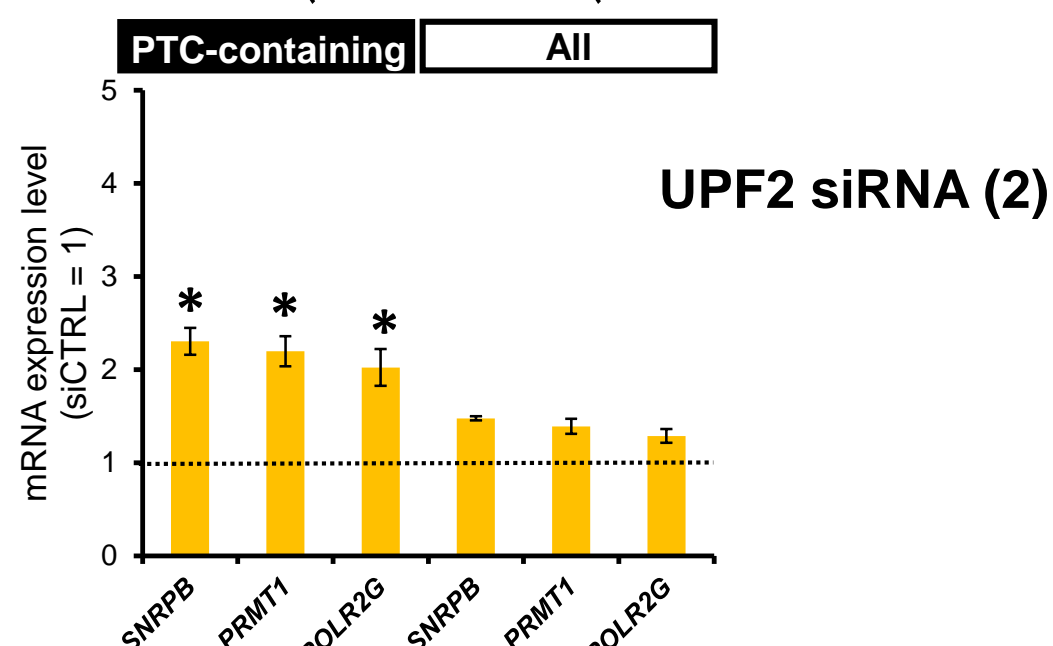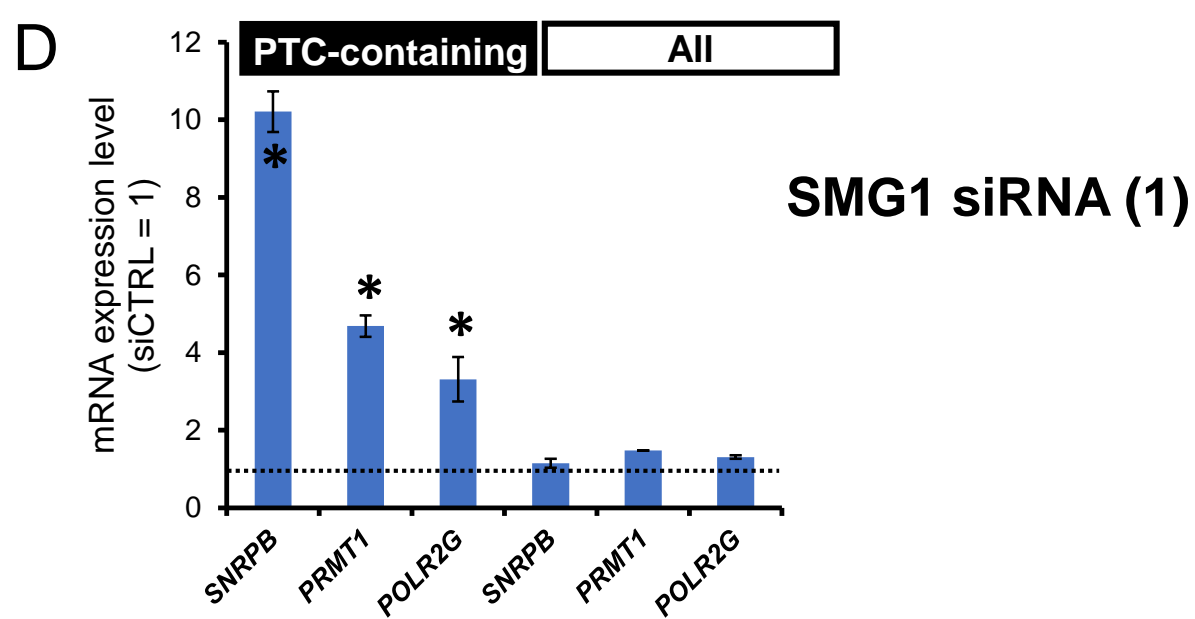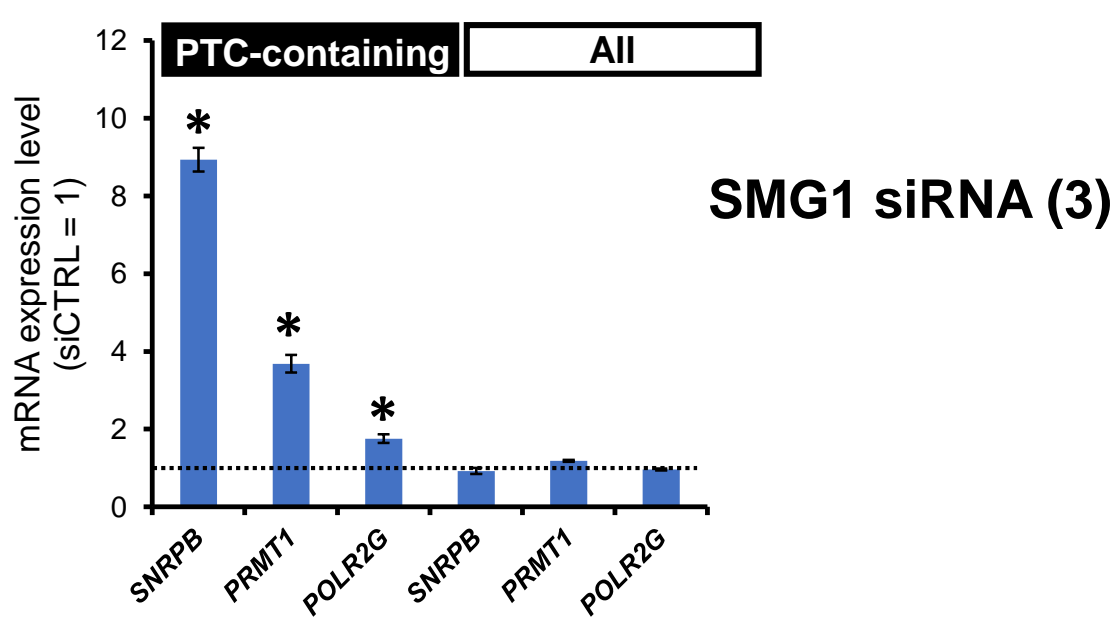

# Supplemental Fig S2.

E

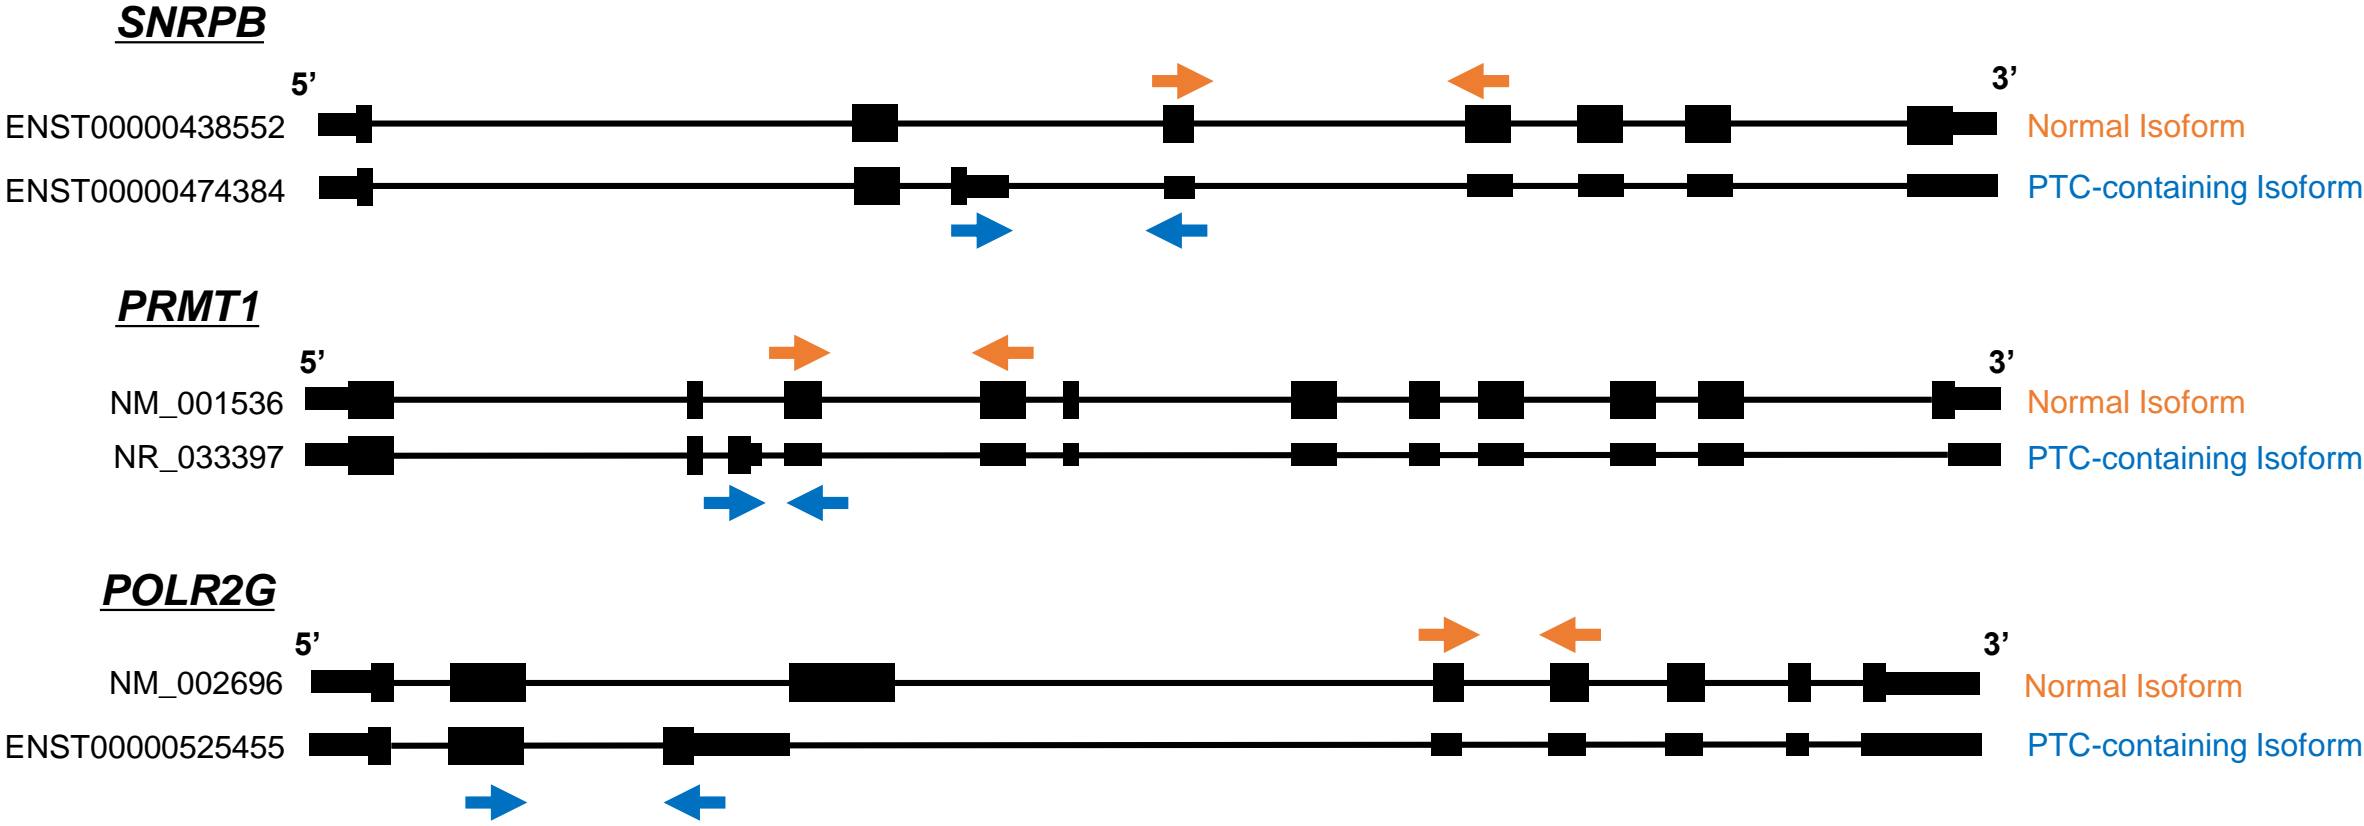

Supplement: supp_gr.206060.116_Supplemental_Fig_S2.pdf [file supp_gr.206060.116_Supplemental_Fig_S2.pdf]

# Supplemental Fig S3.

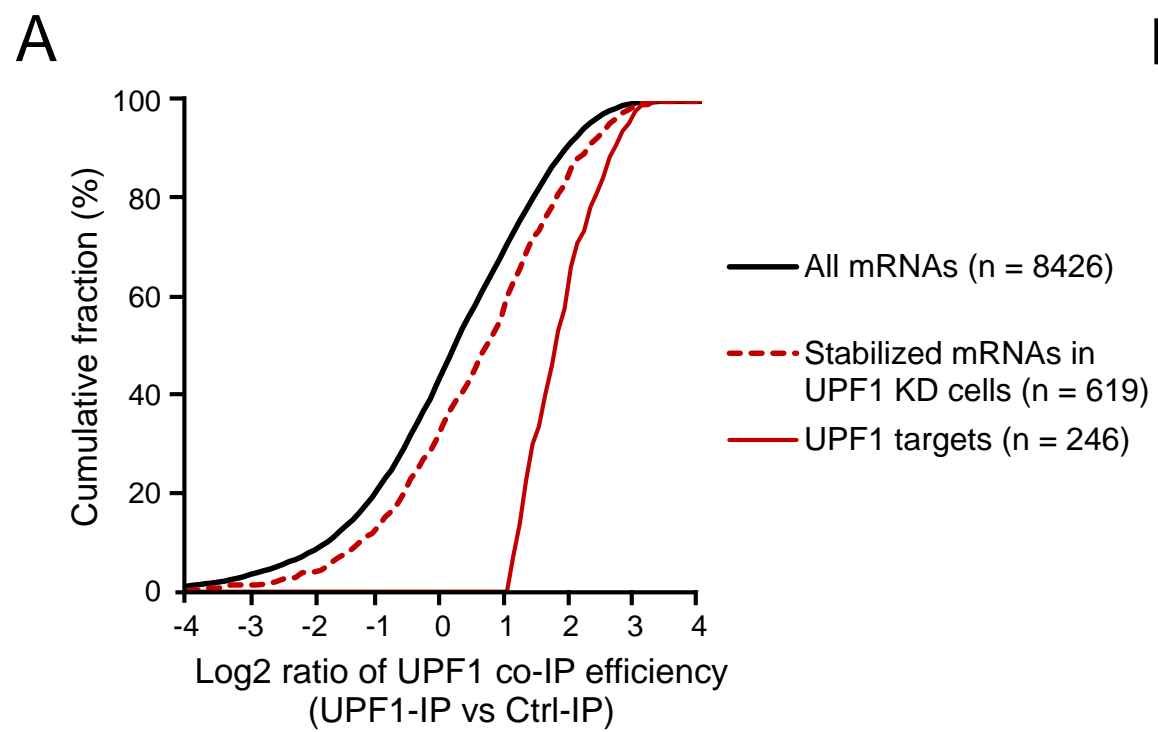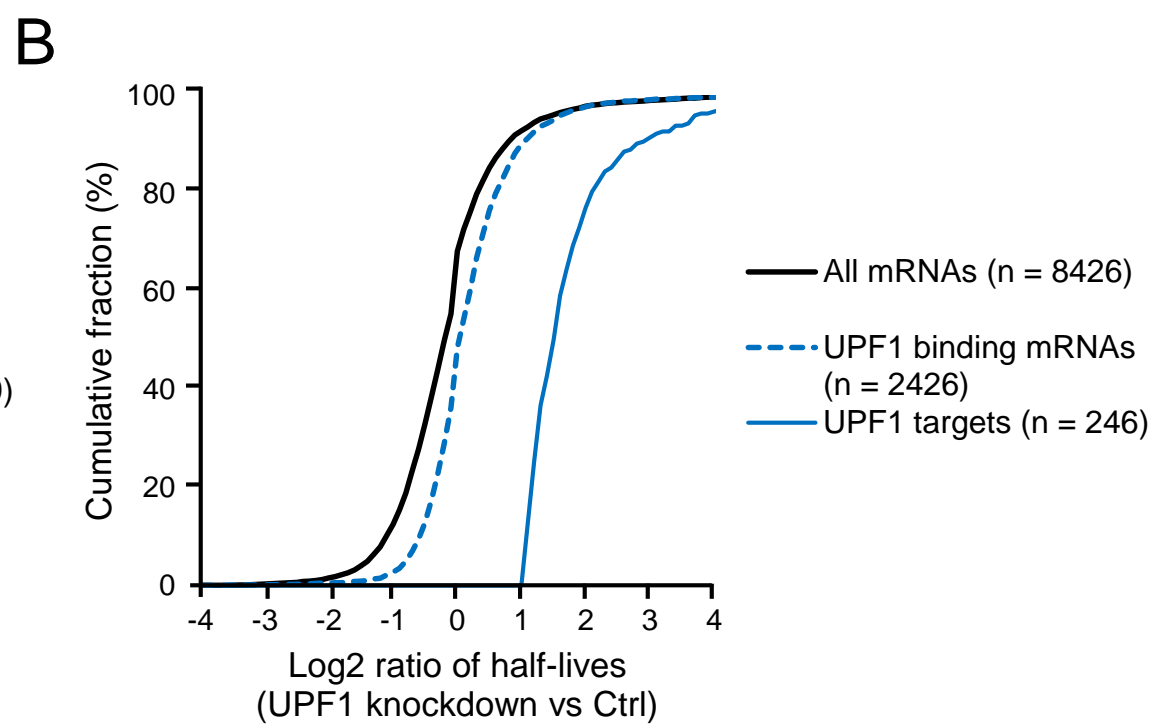

Supplement: supp_gr.206060.116_Supplemental_Fig_S3.pdf [file supp_gr.206060.116_Supplemental_Fig_S3.pdf]

# Supplemental Fig S4.

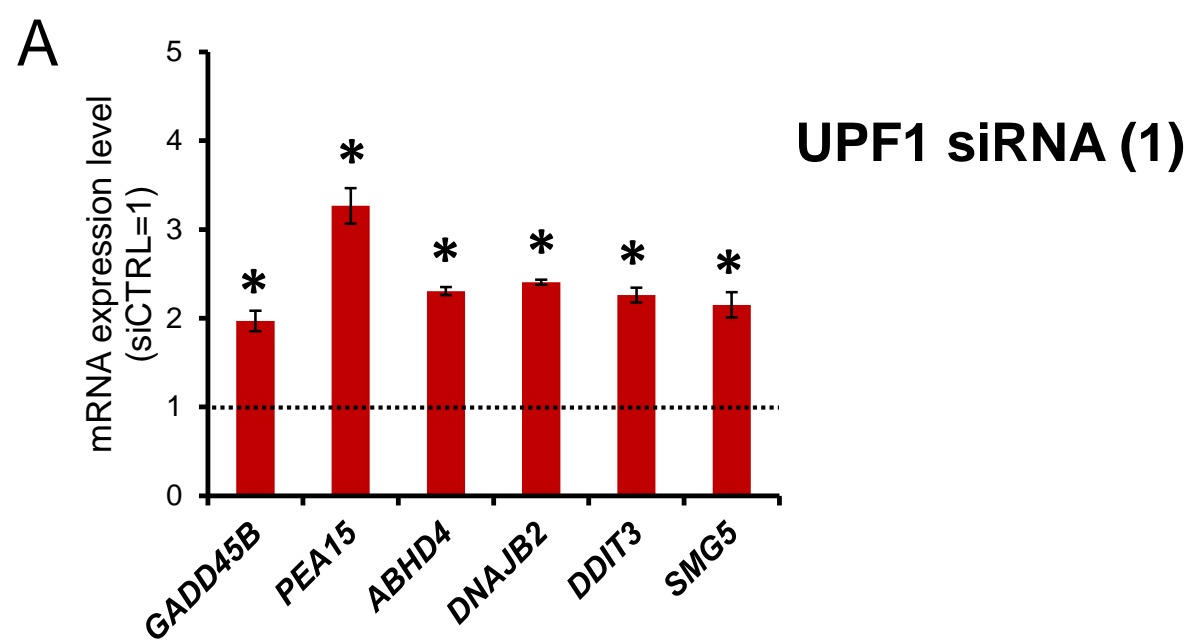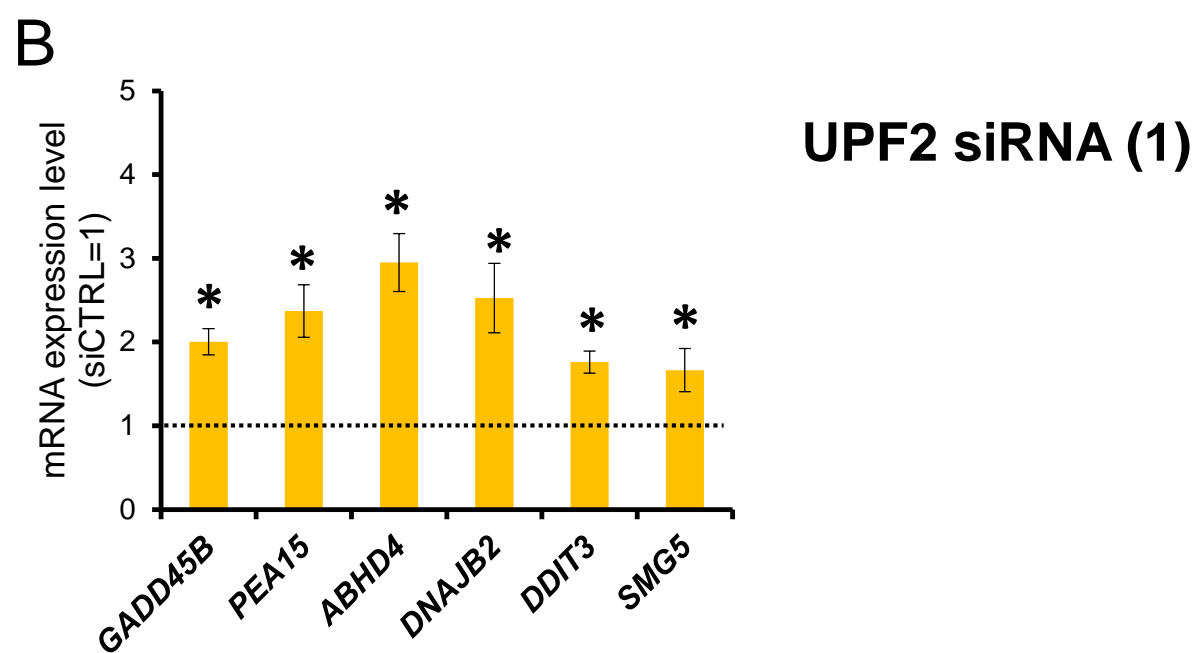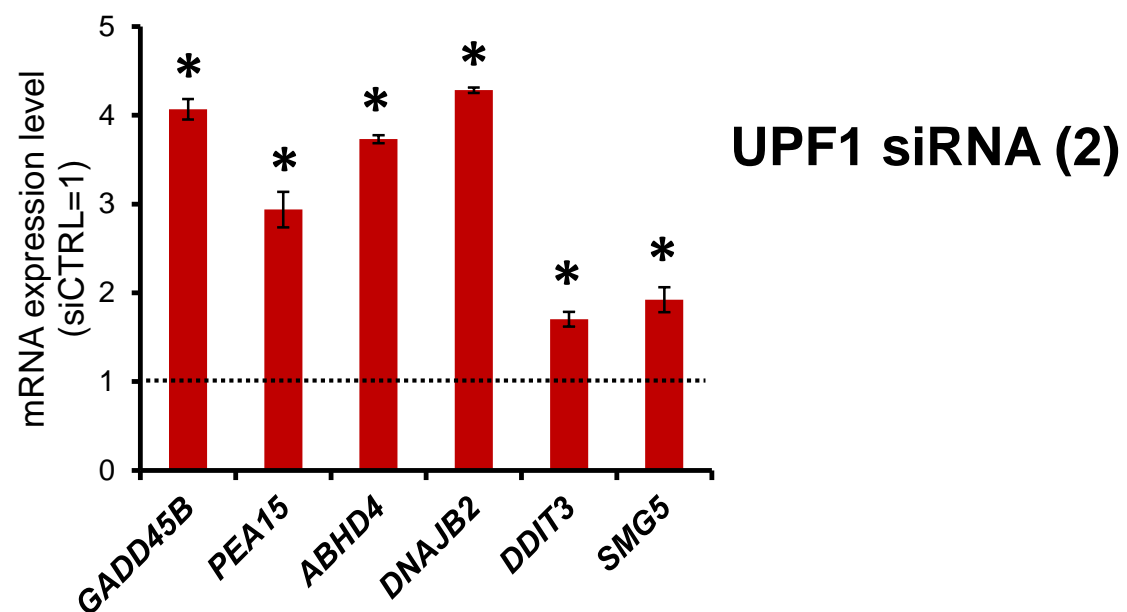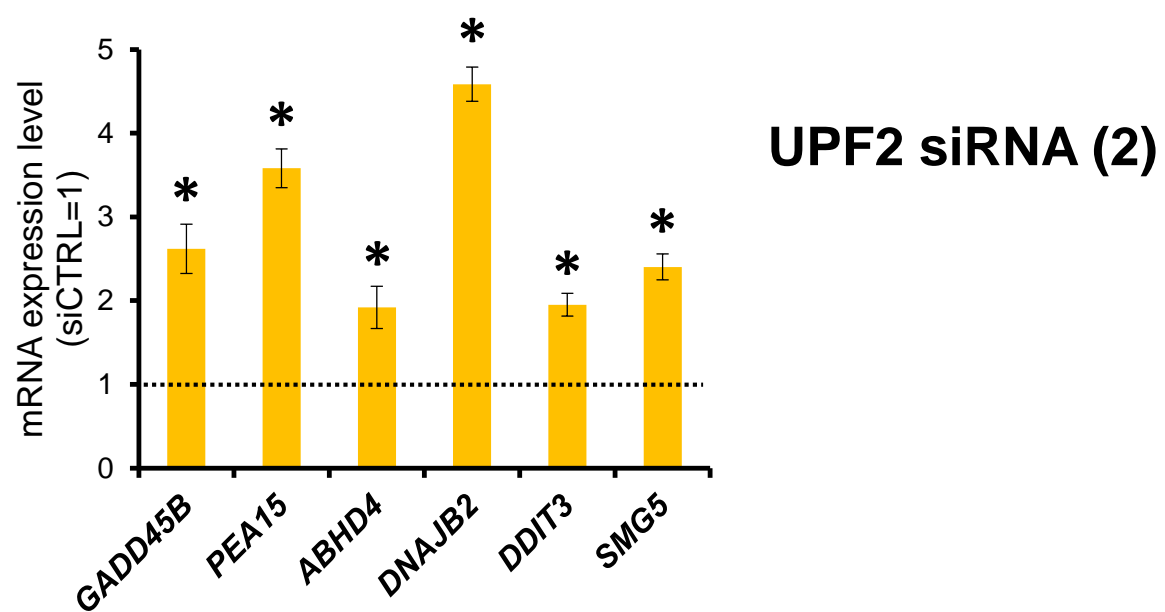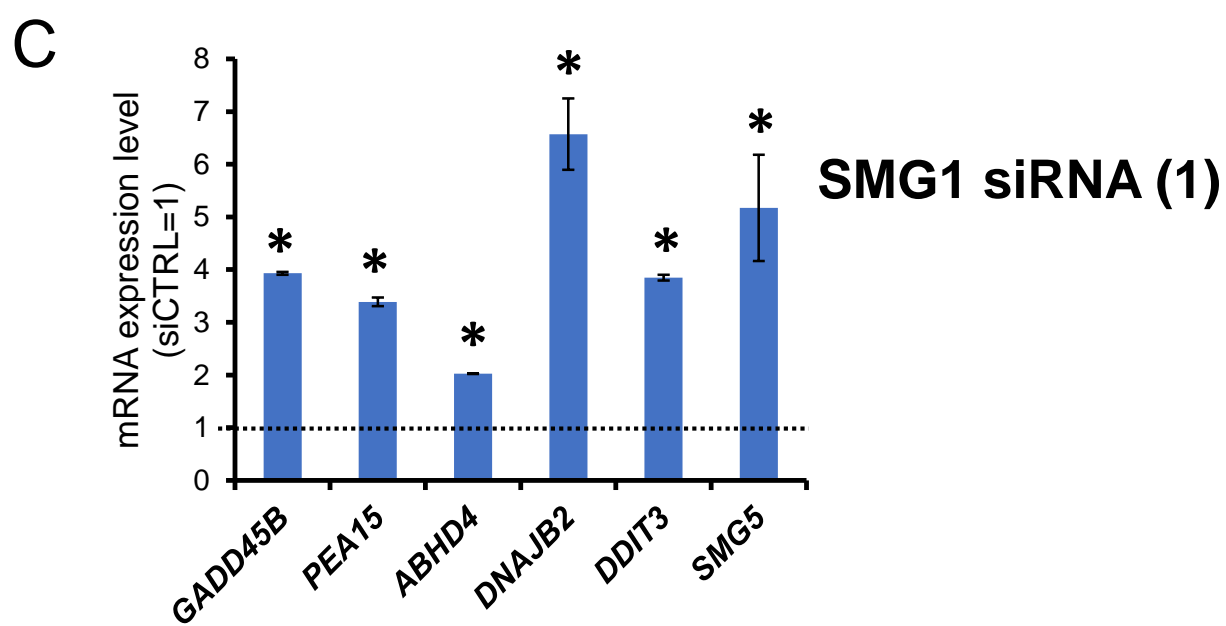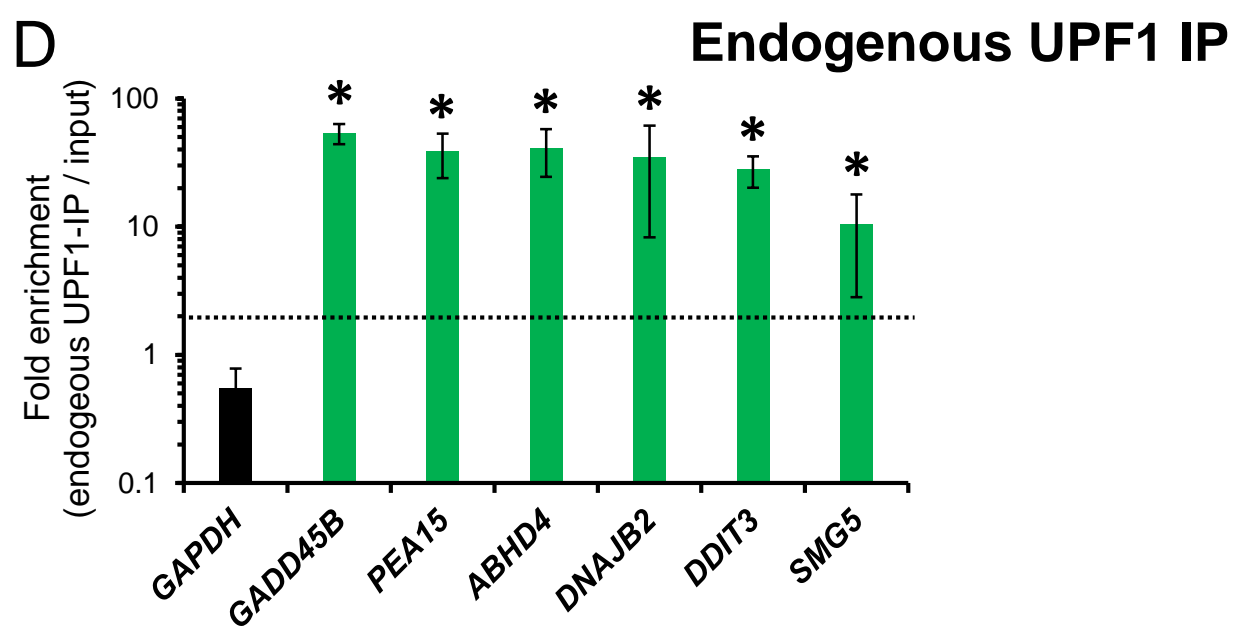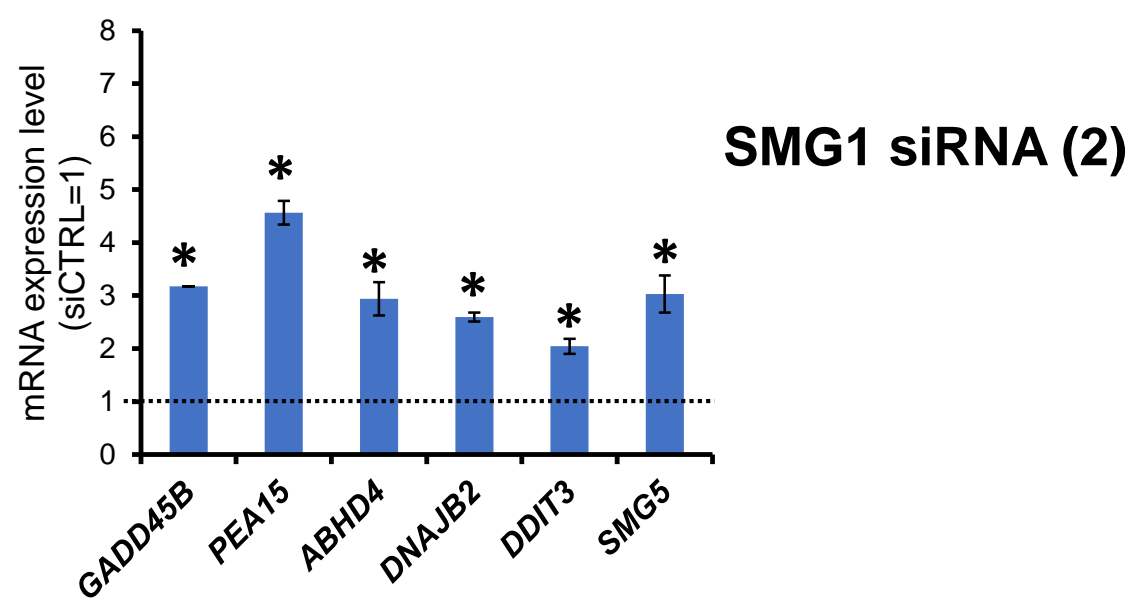

Supplement: supp_gr.206060.116_Supplemental_Fig_S4.pdf [file supp_gr.206060.116_Supplemental_Fig_S4.pdf]

# Supplemental Fig S5.

A

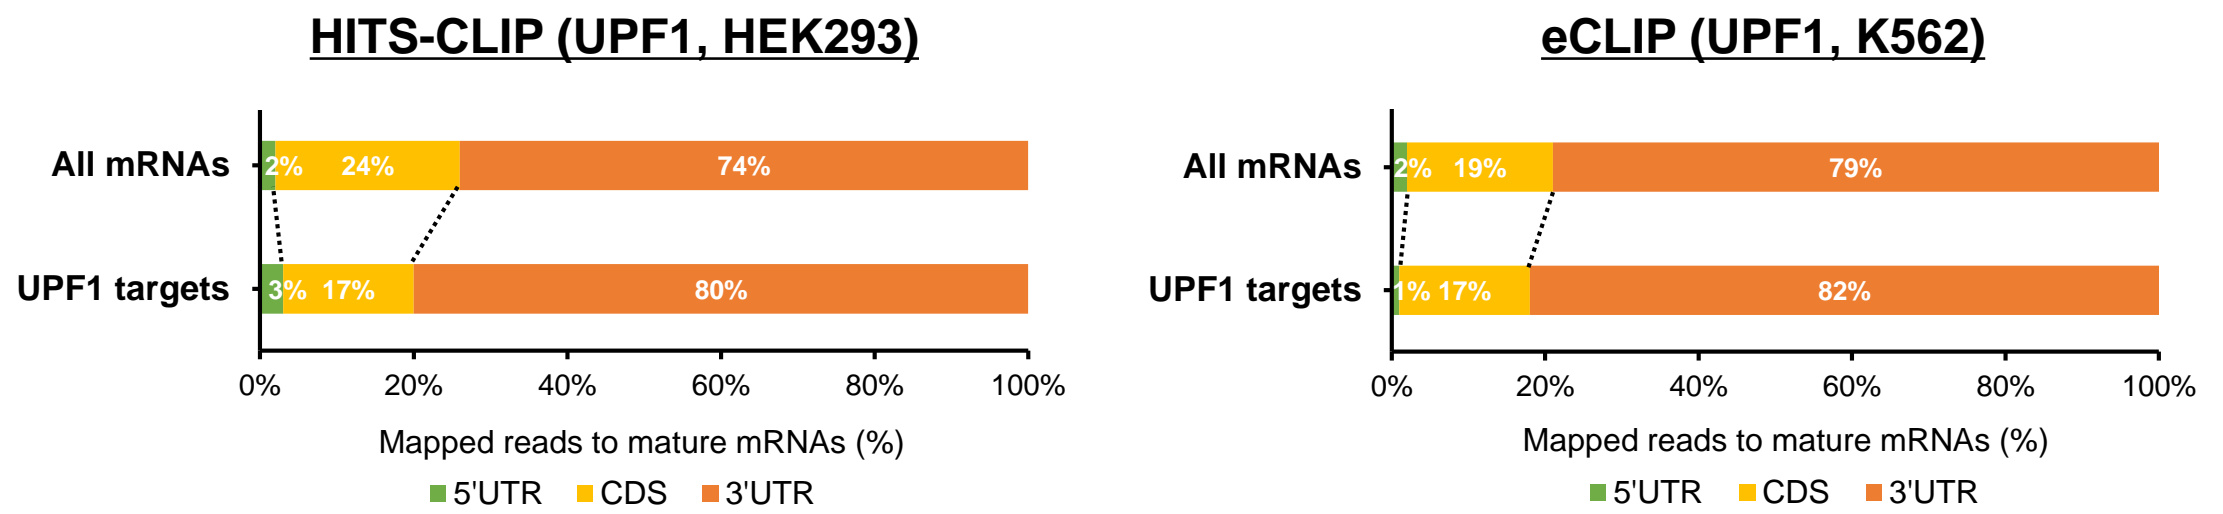

B

## PEA15

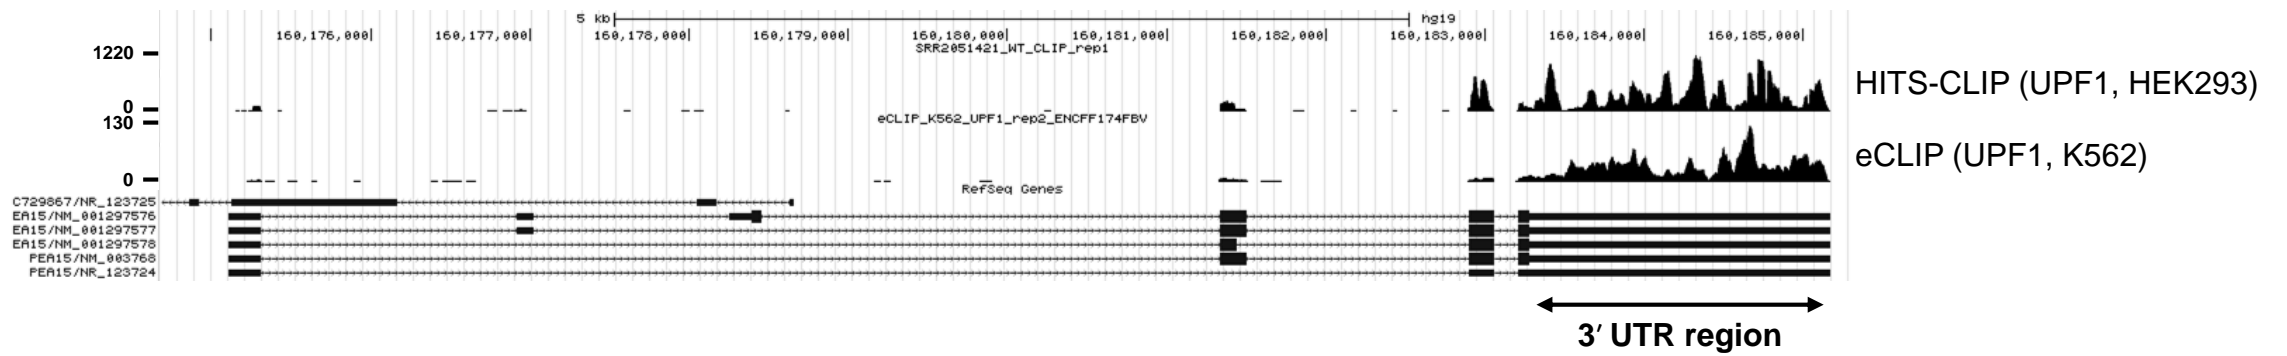

## NAT9

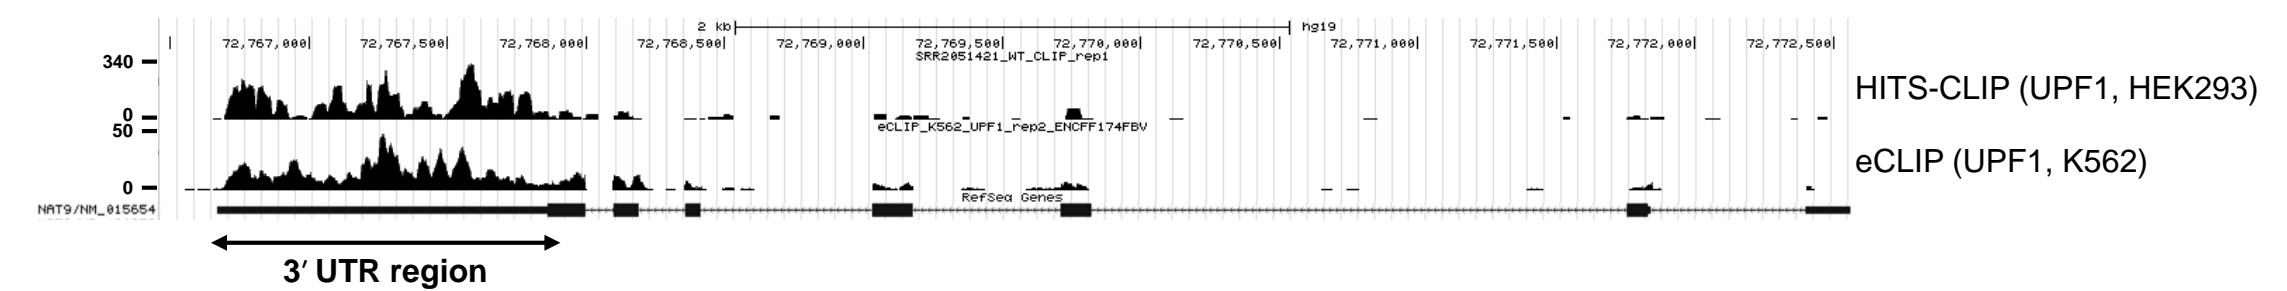

## RASSF1

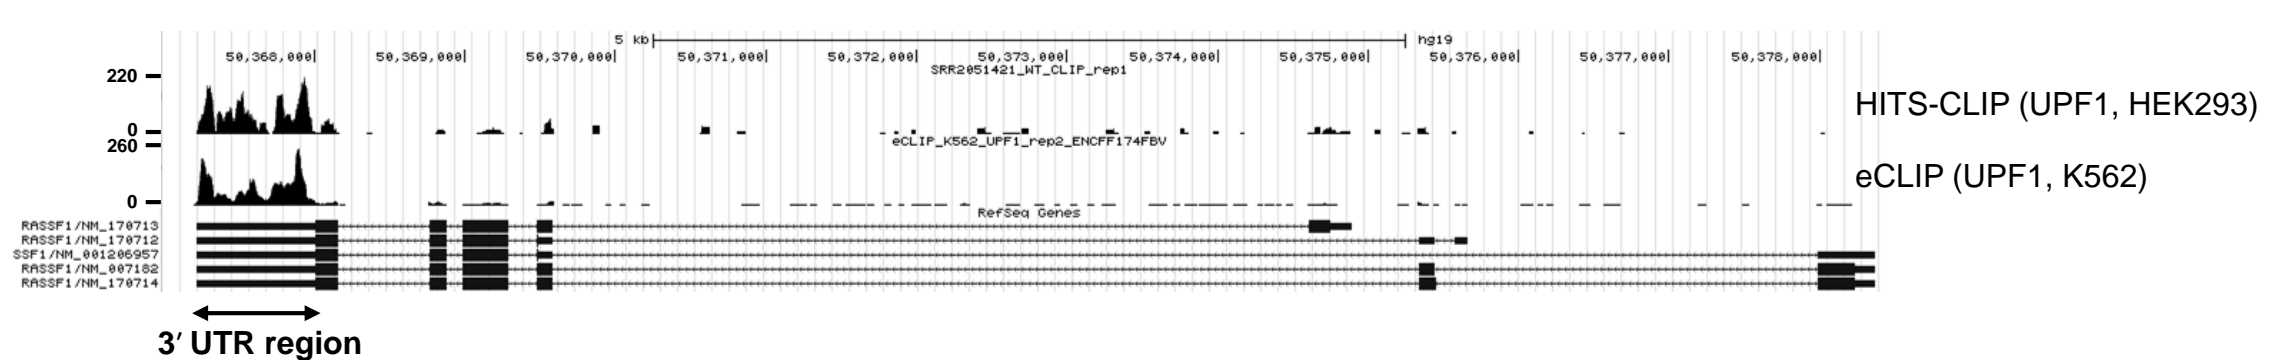

C

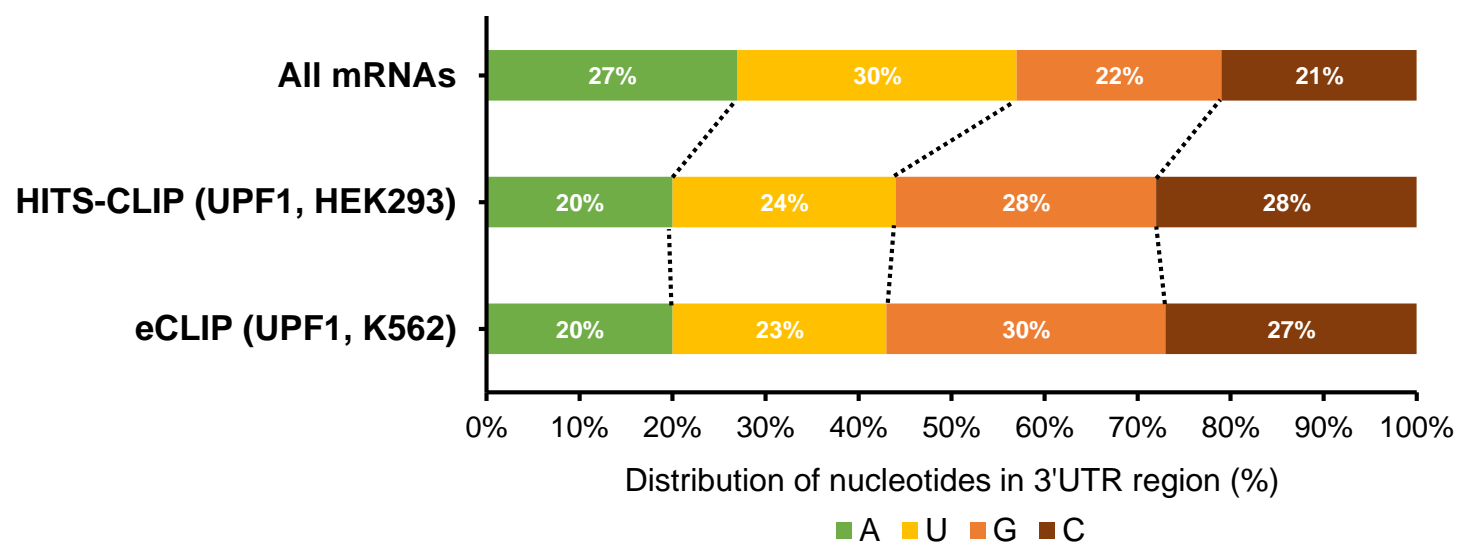

D

## HITS-CLIP (UPF1, HEK293)

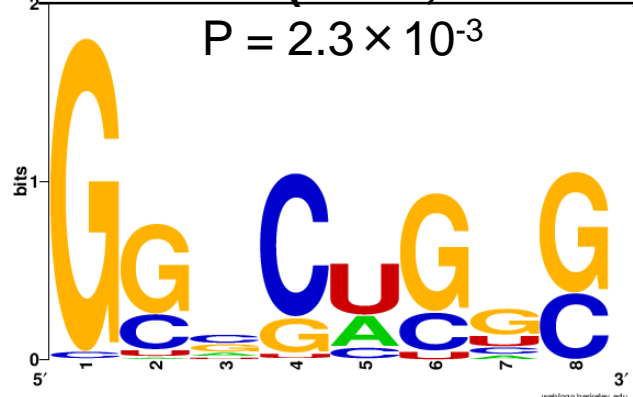

## eCLIP (UPF1, K562)

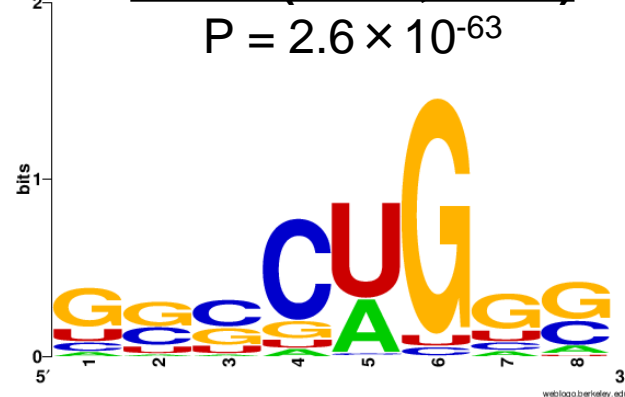

Supplement: supp_gr.206060.116_Supplemental_Fig_S5.pdf [file supp_gr.206060.116_Supplemental_Fig_S5.pdf]

# Supplemental Fig S7.

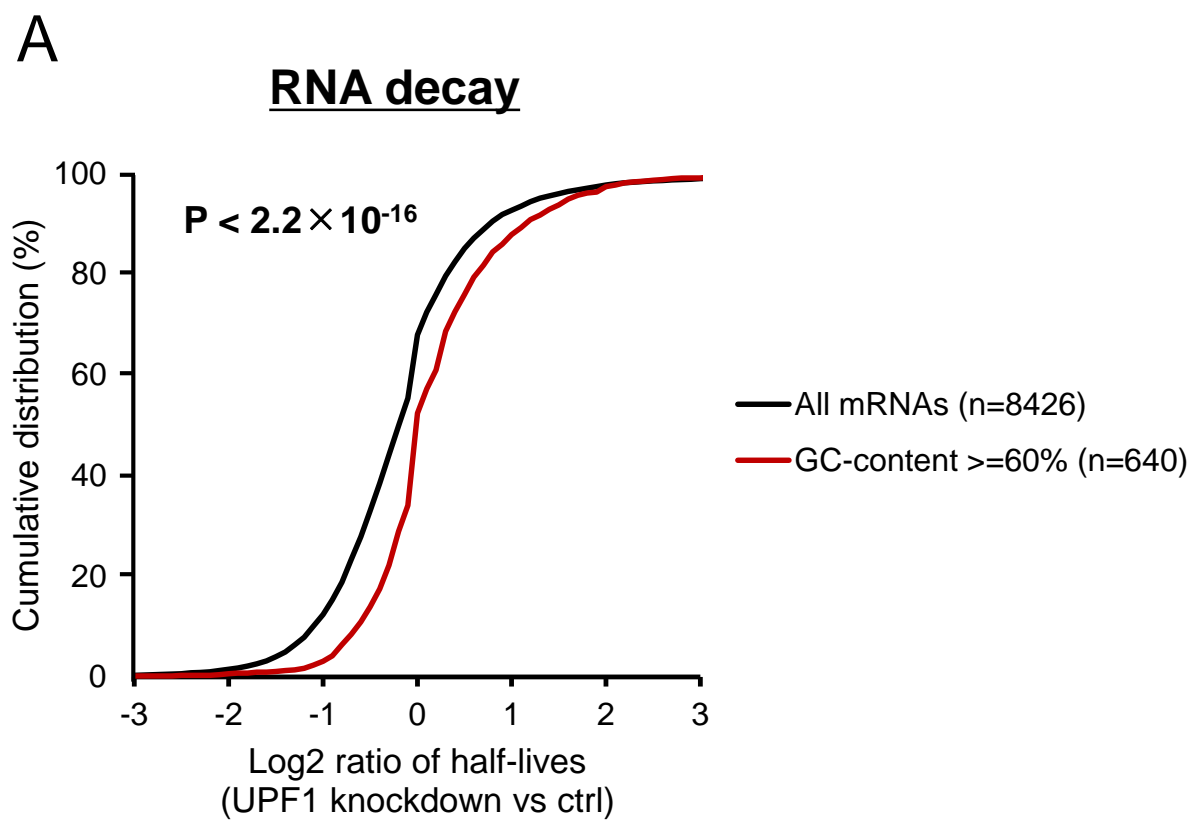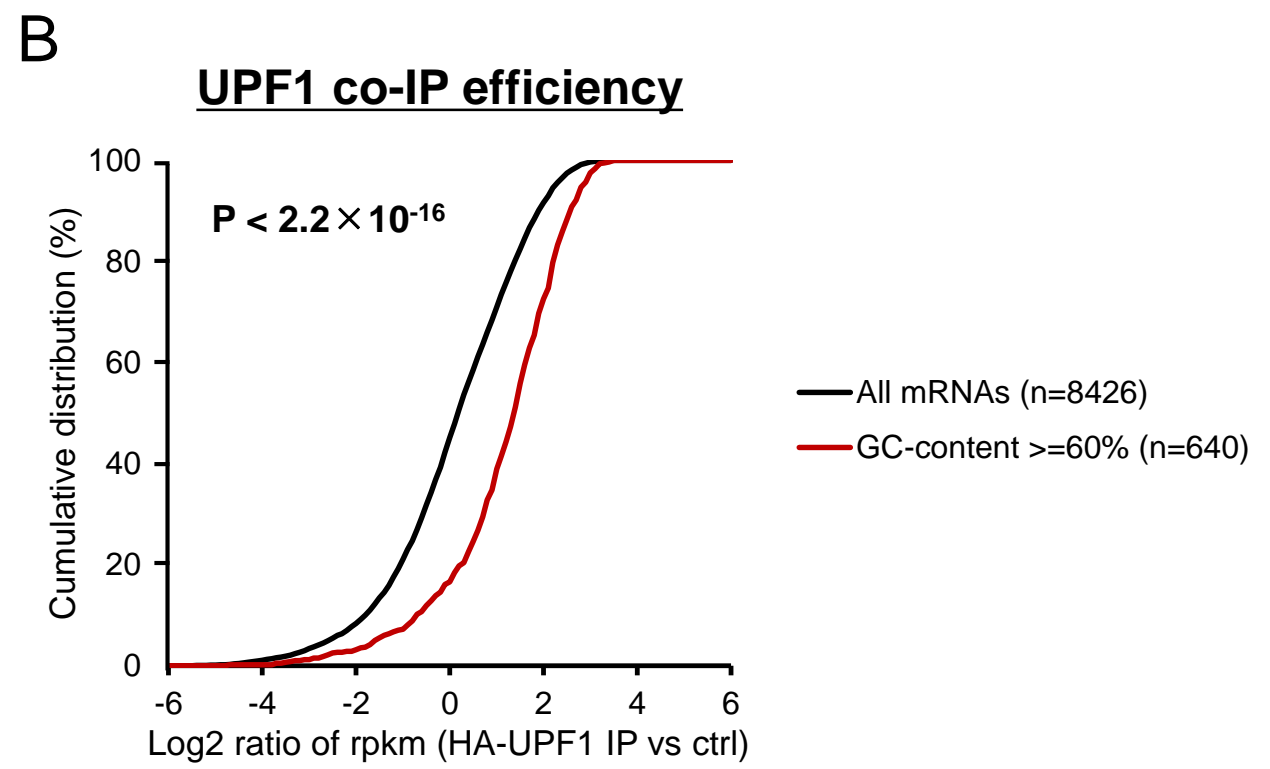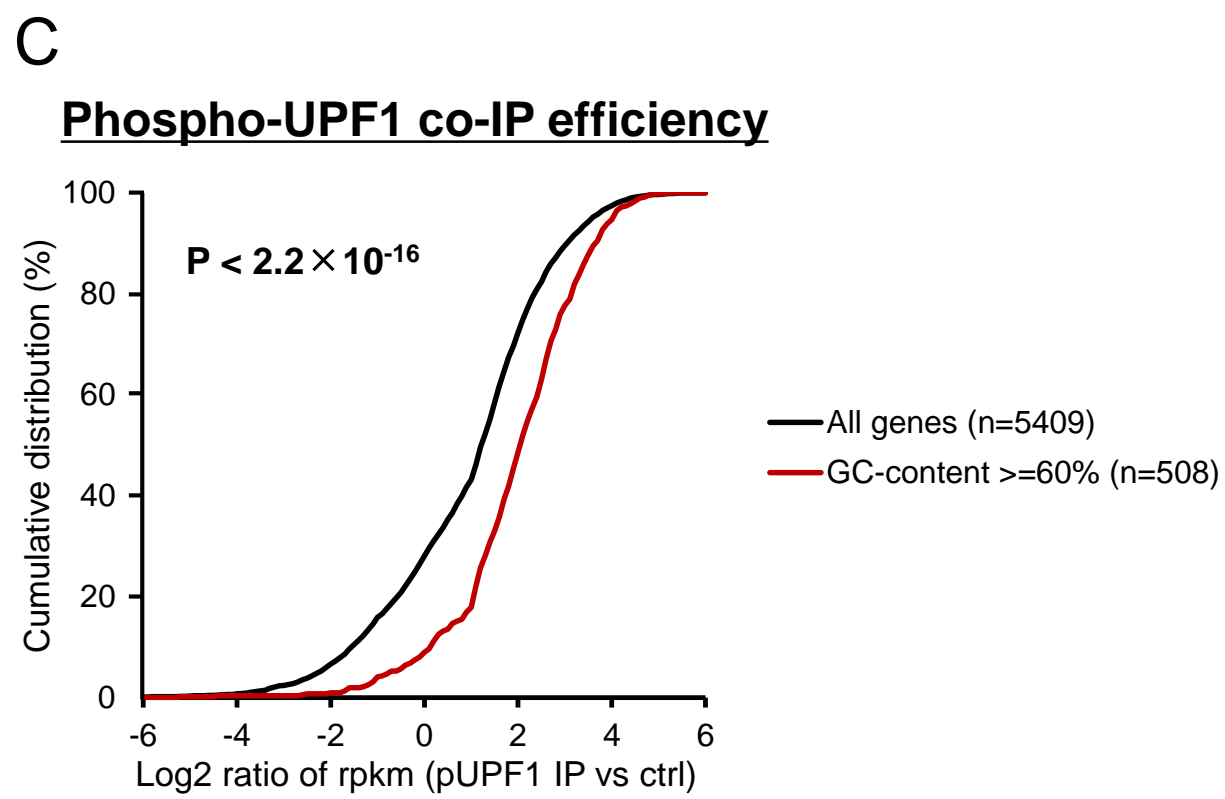

Supplement: supp_gr.206060.116_Supplemental_Fig_S7.pdf [file supp_gr.206060.116_Supplemental_Fig_S7.pdf]

# Supplemental Fig S8.

## A

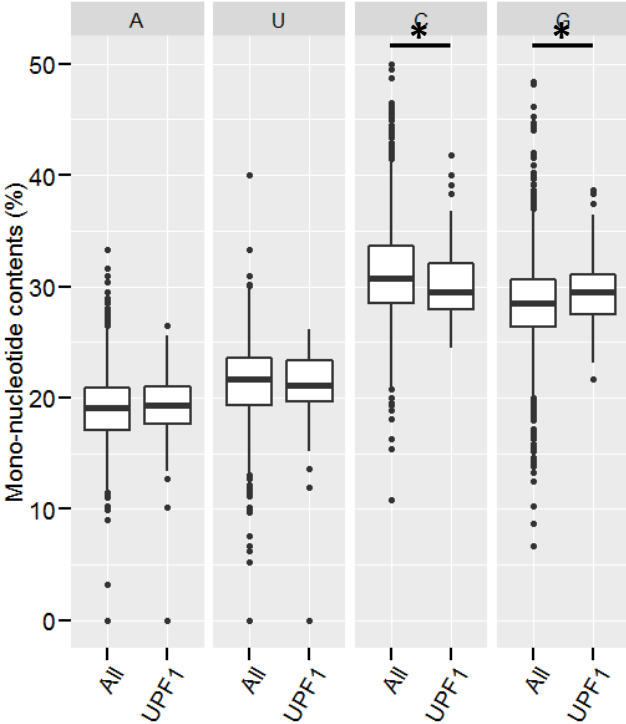

## B

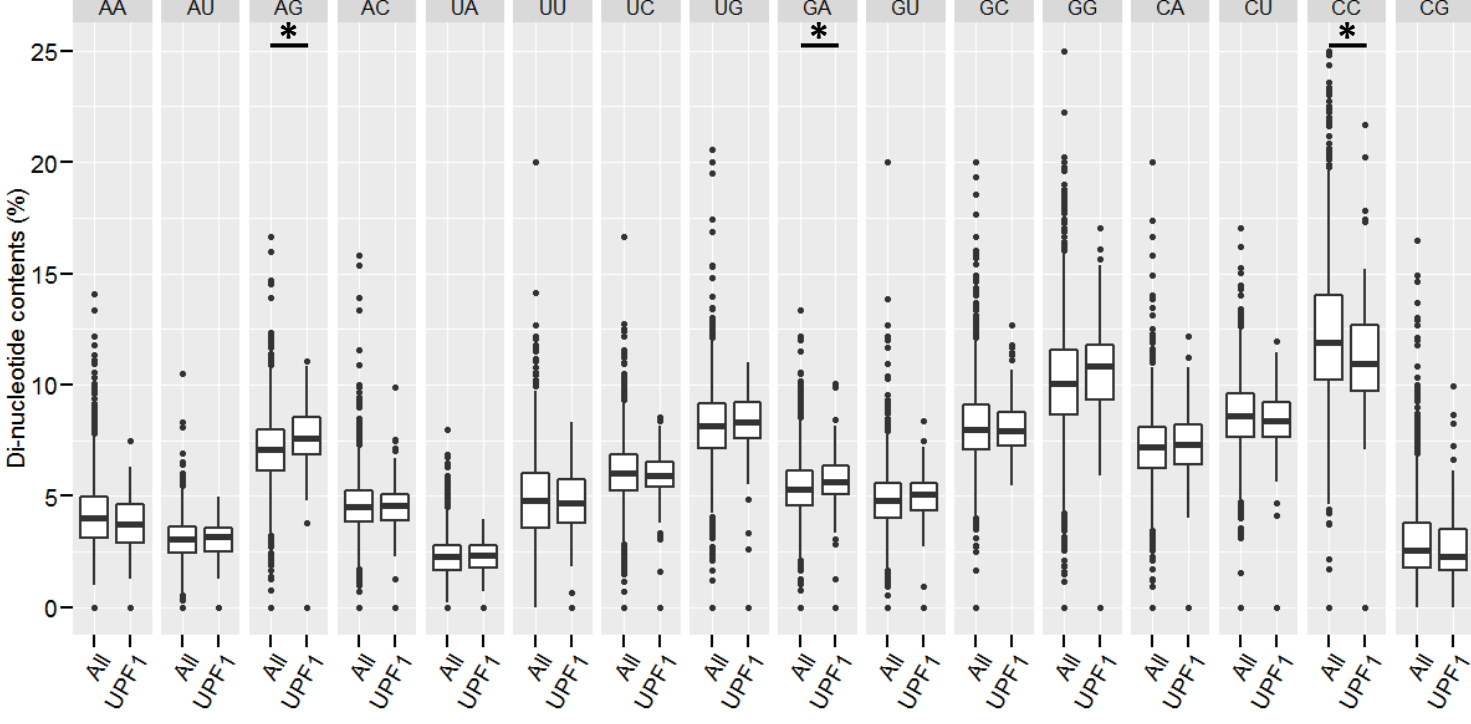

Supplement: supp_gr.206060.116_Supplemental_Fig_S8.pdf [file supp_gr.206060.116_Supplemental_Fig_S8.pdf]
